# Supplementary material for: Metagenomics Insights Into the Microbial Diversity and Microbiome Network Analysis on the Heterogeneity of Influent to Effluent Water
Source: Front Microbiol. 2022 Apr 14;13:779196. doi: 10.3389/fmicb.2022.779196 (PMC9048743; doi:10.3389/fmicb.2022.779196)
Supplement: Supplementary file 2 [file Table_1.XLSX]

## Sheet: Sheet1
specie	Inflluent Mean	Effluent Mean	Mean Difference	%
Klebsiella pneumoniae	2927.29	234.704	-2692.59	0.919822
Enterobacteriaceae_unclassified	1757.29	144.541	-1612.75	0.917747
Enterobacterales_unclassified	678.54	43.8929	-634.647	0.935313
Enterobacter cloacae	489.269	90.0946	-399.175	0.815859
Enterobacter_unclassified	219.659	35.413	-184.246	0.838782
Salmonella enterica	199.596	43.1349	-156.461	0.783889
Serratia marcescens	147.058	31.0055	-116.053	0.789162
Enterobacter hormaechei	101.775	17.4256	-84.3493	0.828783
Enterobacter roggenkampii	60.3444	9.36742	-50.977	0.844767
Morganella morganii	46.2284	10.8775	-35.3509	0.7647
Enterobacter asburiae	32.4407	4.15407	-28.2866	0.871949
Enterobacter kobei	26.2264	3.19198	-23.0344	0.878291
Serratia_unclassified	24.5894	4.85407	-19.7354	0.802595
Serratia quinivorans	20.5198	1.15847	-19.3614	0.943544
Proteus mirabilis	19.5826	2.5583	-17.0243	0.869358
Staphylococcus aureus	30.5438	17.3564	-13.1874	0.431752
Serratia plymuthica	15.6584	2.60988	-13.0485	0.833324
Enterococcus faecium	14.5673	3.09702	-11.4703	0.7874
Serratia sp. S1B	14.4301	3.04404	-11.3861	0.789049
Enterobacteriaceae bacterium S05	11.99	0.60982	-11.3801	0.949139
Enterobacter sp. 9-2	12.4244	1.23645	-11.1879	0.900482
Serratia sp. DD3	10.317	0.839692	-9.4773	0.918611
Enterobacter sp. WCHECl1597	9.91161	0.926853	-8.98476	0.906488
Enterobacter cancerogenus	9.74305	0.953719	-8.78933	0.902113
Obesumbacterium proteus	9.80449	1.09535	-8.70914	0.888281
Serratia fonticola	13.2407	4.62483	-8.61588	0.650711
Serratia ficaria	9.24752	0.67794	-8.56958	0.926689
Enterobacter cloacae complex sp. SMART_763	8.26762	0.739484	-7.52814	0.910557
Serratia sp. ATCC 39006	7.8427	0.620914	-7.22179	0.920829
Serratia oryzae	8.58315	1.45989	-7.12326	0.829912
Enterobacter cloacae complex sp. GN05753	8.06392	1.31189	-6.75202	0.837313
Salmonella phage 7-11	6.07001	0.338141	-5.73187	0.944293
[Enterobacter] lignolyticus	6.08938	0.375375	-5.714	0.938356
Enterobacter sp. 638	6.21087	0.499865	-5.71101	0.919518
Enterobacter cloacae complex sp. GN02693	6.33784	0.677058	-5.66078	0.893172
Proteus terrae	5.69118	0.0814003	-5.60978	0.985697
Enterobacter cloacae complex sp. GN02208	6.24134	0.685407	-5.55593	0.890183
Enterobacter sp. KINAN-G	6.19295	1.05159	-5.14136	0.830196
Salmonella phage SE131	4.91502	0.238388	-4.67663	0.951498
Enterobacter sp. HMSC16D10	5.49092	0.842695	-4.64823	0.846529
Enterobacter phage phiEap-2	5.3131	0.791197	-4.5219	0.851086
Enterobacter mori	4.41896	0.294519	-4.12444	0.933351
Serratia sp. MYb239	3.81739	0.122165	-3.69522	0.967998
Serratia rubidaea	3.97771	0.37166	-3.60605	0.906564
Serratia phage Eta	5.09463	1.56867	-3.52596	0.692093
Enterobacter cloacae complex sp. 35009	3.88627	0.61321	-3.27306	0.842211
Enterobacter cloacae complex sp. CIDEIMsCOL9	3.37143	0.151498	-3.21993	0.955064
Enterobacteriaceae bacterium LSJC7	3.55007	0.344432	-3.20563	0.902979
Enterobacteriaceae bacterium w17	3.33553	0.219775	-3.11575	0.934111
Enterobacteriaceae bacterium B14	4.95929	2.05848	-2.90081	0.584924
Serratia odorifera	3.0146	0.213755	-2.80085	0.929093
Serratia sp. Leaf50	2.63678	0.0486285	-2.58815	0.981558
Enterobacter sp. EGD-HP1	2.98507	0.456597	-2.52847	0.84704
Enterobacteriaceae bacterium 9_2_54FAA	2.48452	0.0964272	-2.3881	0.961189
Enterobacter sp. BIDMC100	2.4998	0.120521	-2.37928	0.951788
Enterobacter sp. DC1	2.5637	0.198472	-2.36523	0.922584
Salmonella virus SE1	2.72469	0.453302	-2.27139	0.833632
Salmonella phage IME207	2.78055	0.514462	-2.26608	0.814978
Serratia liquefaciens	3.06126	0.94871	-2.11255	0.690091
Enterobacter sp. FS01	2.58561	0.533924	-2.05169	0.793502
Morganellaceae_unclassified	2.05118	0.036723	-2.01445	0.982097
Serratia grimesii	2.93902	0.968964	-1.97006	0.670311
Enterobacter cloacae complex sp. 43444	2.06409	0.152618	-1.91147	0.92606
Salmonella bongori	1.97199	0.140468	-1.83152	0.928768
Enterobacter ludwigii	2.73322	0.917373	-1.81584	0.664361
Enterobacter sp. RIT 418	2.22078	0.444281	-1.7765	0.799943
Serratia phage 2050HW	1.74292	0	-1.74292	1
Enterobacter sp. FY-07	1.74582	0.0253563	-1.72047	0.985476
Enterobacter sp. MGH 24	1.95254	0.244873	-1.70766	0.874587
Enterobacter cloacae complex sp. GN03164	1.92376	0.268787	-1.65498	0.860281
Enterobacter sp. NFIX59	1.89837	0.258638	-1.63974	0.863758
Serratia sp. Nf2	1.65724	0.0803497	-1.57689	0.951516
Enterobacter sp. BIDMC92	1.83513	0.266398	-1.56873	0.854834
Enterobacter sp. ku-bf2	1.63431	0.150812	-1.4835	0.907721
Salmonella phage FSL SP-076	1.55873	0.079958	-1.47877	0.948703
Serratia sp. 14-2641	2.28584	0.878958	-1.40688	0.615477
Enterobacter sp. GER_MD16_1505_Eko_090	1.51607	0.124281	-1.39178	0.918024
Enterobacter cloacae complex sp. GN05729	1.52435	0.206994	-1.31736	0.864208
Enterobacter sp. CC120223-11	1.76934	0.494317	-1.27503	0.720621
Enterobacter cloacae complex sp. GN02570	1.52688	0.261052	-1.26583	0.82903
Enterobacter sp. CGMCC 5087	2.07546	0.827558	-1.2479	0.601265
Enterobacter sp. 10-1	1.35759	0.111803	-1.24578	0.917646
Enterobacter cloacae complex sp. GN02141	1.37124	0.133918	-1.23732	0.902338
Enterobacter cloacae complex sp. GN02283	1.32147	0.107365	-1.21411	0.918753
Enterobacter cloacae complex sp. 35699	1.2151	0.0644162	-1.15068	0.946987
Enterobacter sp. BIDMC99	1.25372	0.161439	-1.09228	0.871232
Enterobacter sp. BIDMC 29	1.2084	0.126345	-1.08205	0.895444
Salmonella phage St162	1.27881	0.211507	-1.0673	0.834606
Enterobacter cloacae complex sp.	2.04521	0.997479	-1.04773	0.512285
Enterobacter cloacae complex sp. SMART_930	1.13936	0.0970598	-1.0423	0.914812
Enterobacter sp. UCD-UG_FMILLET	1.15833	0.161582	-0.99675	0.860504
Enterobacter sp. MGH 14	1.06107	0.0752248	-0.985846	0.929105
Enterobacteriaceae bacterium w6	0.985166	0	-0.985166	1
Enterobacter cloacae complex sp. GN04787	0.929694	0.0361707	-0.893523	0.961094
Salmonella virus SP101	1.19243	0.330589	-0.861839	0.72276
Enterobacteriaceae bacterium ENNIH2	0.982997	0.122499	-0.860498	0.875382
Enterobacter sp. MGH 25	0.884343	0.0300702	-0.854273	0.965997
Serratia nematodiphila	0.947819	0.0964385	-0.851381	0.898252
Enterobacterales bacterium CwR94	1.06904	0.221588	-0.84745	0.792722
Enterobacter sp. ZOR0014	0.970773	0.125561	-0.845212	0.870658
Serratia sp. M24T3	0.871383	0.0285132	-0.84287	0.967278
Enterobacter cloacae complex sp. 20432	0.851543	0.05272	-0.798823	0.938089
Enterobacter cloacae complex sp. GN02440	0.895139	0.112486	-0.782653	0.874337
Enterobacter sp. OLF	0.790164	0.0657948	-0.724369	0.916733
Enterobacter sp. MGH 23	0.788595	0.0745878	-0.714007	0.905417
Salmonella phage PMBT28	0.77172	0.0851287	-0.686592	0.88969
Proteus hauseri	1.02269	0.337876	-0.684818	0.669621
Salmonella phage FSL SP-058	0.838869	0.161888	-0.676981	0.807017
Enterobacter cloacae complex sp. GN04826	0.786627	0.127483	-0.659143	0.837937
Salmonella virus VSiP	0.883359	0.22771	-0.655649	0.742223
Salmonella_unclassified	0.668398	0.0137592	-0.654639	0.979415
Salmonella virus FSLSP088	0.68055	0.02664	-0.65391	0.960855
Proteus_unclassified	0.668053	0.0180197	-0.650033	0.973027
Enterobacteriaceae bacterium ENNIH1	0.64767	0	-0.64767	1
Salmonella virus SETP3	0.932259	0.291111	-0.641148	0.687736
Enterobacter sp. Ag1	0.647562	0.0177493	-0.629813	0.972591
Enterobacter timonensis	0.761401	0.134924	-0.626477	0.822796
Enterobacteriaceae bacterium strain FGI 57	0.730026	0.117354	-0.612673	0.839247
Enterobacteriaceae bacterium bta3-1	0.560716	0	-0.560716	1
Serratia sp. FGI94	0.554006	0.0305857	-0.52342	0.944792
Enterobacter sp. WCHECl-C4	0.549258	0.0571742	-0.492084	0.895907
Enterobacter cloacae complex sp. GN03842	0.519621	0.0289207	-0.490701	0.944343
Helicobacter pylori	0.517033	0.0307348	-0.486298	0.940555
Salmonella virus LSPA1	0.551656	0.0777395	-0.473916	0.85908
Enterobacter sp. NFIX45	0.51973	0.0505792	-0.469151	0.902682
Enterobacter cloacae complex sp. GN04363	0.614759	0.153352	-0.461407	0.750549
Enterobacter cloacae complex sp. GN02692	0.514316	0.0602762	-0.45404	0.882803
Enterobacter sp. ODB01	0.453187	0	-0.453187	1
Enterobacter cloacae complex sp. SMART_454	0.558781	0.109559	-0.449222	0.803931
Proteus phage PM 75	1.00542	0.558512	-0.44691	0.4445
Salmonella virus Jersey	0.517048	0.0749167	-0.442131	0.855107
Enterobacter sp. HK169	0.471332	0.031233	-0.440099	0.933735
Enterobacter sp. BIDMC 26	0.517235	0.0850642	-0.432171	0.835541
Enterobacter cloacae complex sp. 35734	0.651493	0.233829	-0.417664	0.641088
Enterobacter cloacae complex sp. ECNIH16	0.400674	0.0201698	-0.380504	0.94966
Salmonella virus VSt10	0.484129	0.125366	-0.358763	0.741049
Salmonella phage S100	0.470905	0.119895	-0.35101	0.745395
Enterobacter sp. HPCN14	0.400884	0.0501077	-0.350776	0.875007
Enterobacter cloacae complex sp. 42192	0.42218	0.0716183	-0.350561	0.830361
Enterobacter sp. BIDMC 30	0.492943	0.148098	-0.344845	0.699563
Salmonella virus Chi	0.406104	0.074346	-0.331758	0.816929
Enterobacter cloacae complex sp. GN02548	0.686074	0.361886	-0.324187	0.472525
Enterobacter sp. NFIX58	0.560945	0.237162	-0.323783	0.577209
Enterobacter cloacae complex sp. 35651	0.346461	0.0245412	-0.32192	0.929166
Serratia sp. Ag1	0.320803	0	-0.320803	1
Enterobacter sp. Crenshaw	0.326252	0.00975817	-0.316493	0.97009
Serratia sp. TKO39	0.306059	0	-0.306059	1
Enterobacter sp. MGH128	0.293104	0	-0.293104	1
Enterobacter sp. Bisph1	0.283163	0	-0.283163	1
Salmonella sp.	0.313806	0.0309583	-0.282847	0.901346
Serratia sp. ISTD04	0.279795	0	-0.279795	1
Serratia sp. S4	0.275029	0	-0.275029	1
Enterobacter cloacae complex sp. FDA-CDC-AR_0132	0.289992	0.0191337	-0.270858	0.93402
Enterobacter sp. SA187	0.306267	0.0396918	-0.266575	0.870401
Serratia sp. GF96	0.288913	0.0312002	-0.257713	0.892008
Enterobacter bugandensis	0.284587	0.037221	-0.247366	0.86921
Enterobacteriaceae bacterium Kuo2-1	0.276384	0.029976	-0.246408	0.891542
Salmonella phage BPS11Q3	0.299595	0.0540352	-0.24556	0.819639
Salmonella phage FSL SP-049	0.427414	0.186637	-0.240777	0.563334
Enterobacter cloacae complex sp. 35618	0.29619	0.0678703	-0.22832	0.770855
Salmonella phage ST4	0.271215	0.043925	-0.22729	0.838044
Enterobacter virus F20	0.290764	0.067311	-0.223453	0.768503
Enterobacter sp. Bisph2	0.207872	0	-0.207872	1
Salmonella virus SP31	0.222695	0.0175737	-0.205121	0.921086
Salmonella phage St161	0.264319	0.059823	-0.204496	0.773671
Serratia sp. JKS000199	0.199146	0	-0.199146	1
Enterobacter soli	0.196388	0	-0.196388	1
Enterobacter cloacae complex sp. SMART_269	0.276956	0.0812178	-0.195738	0.706748
Enterobacter sp. MGH 3	0.195316	0.00761783	-0.187698	0.960997
Enterobacter sp. MGH119	0.19027	0.0106283	-0.179642	0.944141
Enterobacter sp. PDC34	0.231389	0.0573928	-0.173997	0.751964
Serratia sp. HMSC15F11	0.172259	0	-0.172259	1
Enterobacter sp. MGH 33	0.193938	0.0219128	-0.172025	0.887011
Enterobacteriaceae bacterium ATCC 29904	0.220952	0.052338	-0.168614	0.763125
Enterobacter sp. K66-74	0.225523	0.059427	-0.166096	0.736493
Salmonella phage vB_SpuS_Sp4	0.178502	0.0167772	-0.161725	0.906011
Salmonella phage 21	0.157053	0	-0.157053	1
Salmonella phage 118970_sal1	0.201577	0.0446443	-0.156933	0.778525
Salmonella phage SE1 (in:Nonagvirus)	0.894375	0.741528	-0.152847	0.170898
Proteus phage PM87	0.173234	0.0224598	-0.150775	0.87035
Serratia sp. TEL	0.150023	0	-0.150023	1
Enterobacter sp. DC4	0.177592	0.0347103	-0.142882	0.80455
Enterobacter cloacae complex sp. CIDEIMsCOL1	0.23627	0.0946588	-0.141611	0.599362
Salmonella phage SPAsTU	0.521652	0.391206	-0.130447	0.250064
Enterobacter sp. HP19	0.124716	0	-0.124716	1
Proteus sp. FJ2001126-3	0.120593	0	-0.120593	1
Proteus phage pPM_01	0.115992	0	-0.115992	1
Enterobacteria phage K1F	0.107788	0	-0.107788	1
Enterobacteria phage ECGD1	0.411646	0.312262	-0.099384	0.241431
Serratia sp. FS14	0.0975482	0	-0.0975482	1
Salmonella phage 41	0.0968278	0	-0.0968278	1
Serratia ureilytica	0.0962132	0	-0.0962132	1
Enterobacter sp. EC-NT1	0.0953743	0	-0.0953743	1
Enterobacter sp. NFR05	0.0943532	0	-0.0943532	1
Salmonella virus SSE121	0.182127	0.0915322	-0.0905948	0.497427
Enterobacterial phage mEp390	0.0886675	0	-0.0886675	1
Enterobacter sp. DC3	0.0883652	0	-0.0883652	1
Enterobacter sp. MGH 37	0.109517	0.026102	-0.0834147	0.761662
Salmonella virus VSe103	0.14205	0.0653268	-0.0767228	0.540113
Enterobacter sp. RC4	0.0747003	0	-0.0747003	1
Enterobacter sp. 50588862	0.125701	0.052817	-0.0728843	0.579821
Morganella_unclassified	0.0586275	0	-0.0586275	1
Enterobacter sp. T1-1	0.0970032	0.0427805	-0.0542227	0.558978
Enterobacter sp. HMSC055A11	0.0522568	0	-0.0522568	1
Salmonella phage STP03	0.0427615	0	-0.0427615	1
Salmonella phage 40	0.041287	0	-0.041287	1
Enterobacteria phage DT571/2	0.0456523	0.0150418	-0.0306105	0.670513
Salmonella virus Ent1	0.04928	0.0484803	-0.000799667	0.016227
Salmonella phage 19	0.0731712	0.0755877	0.0024165	-0.0330253
Morganella phage vB_MmoM_MP1	0.0637327	0.0674883	0.00375567	-0.0589284
Enterobacter phage Arya	0.693827	0.720255	0.026428	-0.0380902
Salmonella virus Maynard	0.0695218	0.0987148	0.029193	-0.419911
Salmonella phage S132	0	0.0405652	0.0405652	#DIV/0!
Serratia phage 2050H1	0	0.0526575	0.0526575	#DIV/0!
Salmonella virus FelixO1	0	0.0552177	0.0552177	#DIV/0!
Enterobacter cloacae complex sp. GN05526	0.0832802	0.13939	0.0561093	-0.673742
Thermoproteus sp. AZ2	0	0.058549	0.058549	#DIV/0!
Enterobacter cloacae complex sp. GN06232	0.251778	0.314086	0.0623075	-0.24747
Enterobacteria phage RB15	0	0.0635645	0.0635645	#DIV/0!
Salmonella phage BP12B	0	0.0675035	0.0675035	#DIV/0!
Salmonella virus VSt472	0.0192772	0.086872	0.0675948	-3.50647
Salmonella phage S118	0	0.070837	0.070837	#DIV/0!
Salmonella phage Mutine	0.0117503	0.0879357	0.0761853	-6.48367
Salmonella phage SP1	0.00761017	0.0864452	0.078835	-10.3592
Enterobacter cloacae complex sp. 35669	0.630939	0.71788	0.086941	-0.137796
Motiliproteus sp. MSK22-1	1.12423	1.2163	0.0920728	-0.0818984
Serratia sp. 506_PEND	0	0.104125	0.104125	#DIV/0!
Salmonella phage Stp1	0	0.11704	0.11704	#DIV/0!
Proteus genomosp. 4	0.296416	0.429797	0.133382	-0.449982
Salmonella virus Mushroom	0	0.146225	0.146225	#DIV/0!
Salmonella phage FSL SP-010	0	0.151849	0.151849	#DIV/0!
Salmonella virus Marshall	0.0692922	0.235811	0.166519	-2.40314
Salmonella phage LPST10	0.129083	0.303036	0.173953	-1.34761
Enterobacteria phage mEp021	0.134364	0.318145	0.183781	-1.36779
Serratia phage BF	1.19731	1.42206	0.224749	-0.187712
Proteus phage PM 116	0.0212977	0.261349	0.240051	-11.2713
Morganella psychrotolerans	0.542845	0.830353	0.287509	-0.529633
Salmonella phage vB_SenS-Ent2	0.00320717	0.366471	0.363264	-113.266
Serratia phage X20	0.0437015	0.479438	0.435736	-9.97074
Salmonella phage vB_SenS_Sasha	0.112457	0.59097	0.478513	-4.25508
Proteus penneri	0.0969347	0.60514	0.508206	-5.24276
Enterobacter phage phiKDA1	0.0222563	0.566568	0.544311	-24.4565
Enterobacter phage phiEM4	0	0.55079	0.55079	#DIV/0!
Enterobacter phage EcP1	0	0.639341	0.639341	#DIV/0!
Proteus phage phiP4-3	0.0500333	0.732443	0.68241	-13.6391
Salmonella virus STML131	0	0.700367	0.700367	#DIV/0!
Serratia sp. C-1	0.961108	1.69348	0.732367	-0.762003
Salmonella phage Vi II-E1	0.191579	1.0326	0.841022	-4.38995
Serratia phage Scapp	0	0.860811	0.860811	#DIV/0!
Proteus phage PM2	0.0370722	0.951076	0.914004	-24.6547
Proteus vulgaris	2.2571	3.20468	0.947577	-0.419821
Serratia entomophila	0	1.0235	1.0235	#DIV/0!
Salmonella virus 9NA	0.105612	1.16784	1.06223	-10.0579
Salmonella phage BSP101	0	1.08668	1.08668	#DIV/0!
Proteus phage VB_PmiS-Isfahan	0	1.19203	1.19203	#DIV/0!
Salmonella virus SKML39	0.0999385	1.3026	1.20266	-12.034
Serratia symbiotica	0.306294	1.58157	1.27528	-4.16357
Serratia sp. JKS296	0.016159	1.3915	1.37534	-85.1129
Salmonella phage vB_SnwM_CGG4-1	0.0516237	1.61078	1.55916	-30.2024
Enterobacteria phage phi92	3.45251	5.11352	1.66101	-0.481103
Enterobacteria phage EcoDS1	0.221979	2.14403	1.92205	-8.65871
Serratia sp. Leaf51	0.905245	3.00146	2.09622	-2.31564
Motiliproteus coralliicola	0.991815	3.15247	2.16065	-2.17848
Enterobacter cloacae complex sp. ECNIH14	1.75199	4.03311	2.28112	-1.30202
Enterobacter cloacae complex sp. FDA-CDC-AR_0164	0	3.28012	3.28012	#DIV/0!
Serratia proteamaculans	2.87605	6.20737	3.33133	-1.1583
Enterobacteria phage vB_KleM-RaK2	0.241614	4.0913	3.84968	-15.9332
Enterobacter sp. 50793107	0.234662	5.09028	4.85562	-20.692
Serratia sp. BW106	0.606287	5.96448	5.35819	-8.83772
Salmonella virus S16	0.0908845	7.34152	7.25064	-79.7786
Pseudomonas fragi	173086	30125.2	-142961	0.825952
Pseudomonas_unclassified	80569	10388	-70181	0.871067
Pseudomonas psychrophila	40189.2	8024.89	-32164.3	0.800322
Pseudomonas deceptionensis	32851.6	8090.91	-24760.7	0.753713
Shewanella_unclassified	15387.3	197.869	-15189.4	0.987141
Janthinobacterium_unclassified	16789.5	2303.22	-14486.3	0.862818
Pseudomonas versuta	14975.3	2689.56	-12285.8	0.8204
Pseudomonas helleri	12787.9	508.823	-12279	0.96021
Pseudomonas fluorescens	12949.2	1310.88	-11638.3	0.898767
Tolumonas auensis	10268.3	680.76	-9587.56	0.933703
Pseudomonas lundensis	10092.9	740.961	-9351.89	0.926586
Janthinobacterium lividum	8945.65	686.821	-8258.83	0.923223
Pseudomonas sp. Irchel 3H3	8072.29	340.503	-7731.79	0.957818
Flavobacterium aquatile	7668.92	50.9677	-7617.95	0.993354
Aeromonas_unclassified	7368.18	356.142	-7012.03	0.951665
Prevotella copri	7093.17	214.127	-6879.04	0.969812
Pseudomonas guineae	6836.7	8.45762	-6828.25	0.998763
Acidovorax temperans	7097.53	511.272	-6586.26	0.927965
Pseudomonas grimontii	7157.93	589.008	-6568.92	0.917712
Tolumonas lignilytica	7032.83	490.421	-6542.41	0.930267
Rivicola pingtungensis	8574.25	2042.74	-6531.52	0.761759
Flavobacterium sasangense	6972.57	739.593	-6232.98	0.893928
Shewanella xiamenensis	5962.48	21.8911	-5940.59	0.996329
Pseudomonas pohangensis	5137.89	48.0418	-5089.85	0.99065
Pseudomonas extremaustralis	6622.53	1782.64	-4839.89	0.730822
Parabacteroides chartae	4660.03	320.804	-4339.23	0.931158
Comamonadaceae bacterium CCH4-C5	4625.63	393.924	-4231.71	0.914839
Cloacibacterium normanense	4418.7	443.409	-3975.29	0.899652
Treponema sp. J25	4225.11	396.401	-3828.71	0.90618
Janthinobacterium sp. 13	3845.98	102.163	-3743.81	0.973436
Acidovorax sp. CCH12-A4	3974.35	303.137	-3671.21	0.923726
Aeromonas veronii	3630.61	129.553	-3501.05	0.964316
Paludibacter propionicigenes	3663.72	303.896	-3359.82	0.917053
Pseudomonas veronii	3895.78	561.856	-3333.92	0.855778
Flavobacterium aquaticum	3674.91	623.419	-3051.49	0.830358
Janthinobacterium sp. TND4EL3	4467.55	1480.7	-2986.85	0.668566
Undibacterium pigrum	3409.51	586.442	-2823.07	0.827998
Pseudomonas sp. CBZ-4	3138.18	383.52	-2754.66	0.877789
Janthinobacterium sp. LM6	2797.9	77.8694	-2720.03	0.972169
Bacteroides_unclassified	2888.51	287.483	-2601.03	0.900474
Methylotenera sp. G11	2592.07	42.8322	-2549.23	0.983476
Escherichia coli	2803.87	283.919	-2519.96	0.89874
Pseudomonas taetrolens	2732.76	218.59	-2514.17	0.920011
Aeromonas caviae	2609.47	154.084	-2455.39	0.940952
Pseudomonas sp. Irchel 3E20	2472.9	43.6015	-2429.3	0.982368
Pseudomonas sp. PGPPP3	2413.46	25.2392	-2388.22	0.989542
Aliiarcobacter cryaerophilus	2417.6	30.1824	-2387.42	0.987516
Janthinobacterium sp. 78	2673.8	372.04	-2301.76	0.860857
Shewanella baltica	2770.78	476.077	-2294.7	0.828179
Flavobacterium_unclassified	2305.63	82.3318	-2223.29	0.964291
Janthinobacterium sp. 35	2476.59	368.858	-2107.73	0.851062
Bacteroides graminisolvens	2299.09	193.314	-2105.77	0.915917
Proteobacteria_unclassified	2437.79	400.34	-2037.45	0.835778
Gammaproteobacteria bacterium HGW-Gammaproteobacteria-13	1865.81	5.94967	-1859.86	0.996811
Burkholderiales bacterium RIFCSPHIGHO2_12_FULL_63_20	2070.74	223.91	-1846.83	0.891869
Chryseobacterium_unclassified	1855.04	11.3917	-1843.64	0.993859
Pseudarcobacter caeni	1824.02	17.331	-1806.69	0.990498
Pseudomonas koreensis	2021.79	252.565	-1769.22	0.875078
Pseudomonas sp. Lz4W	2009.88	271.463	-1738.42	0.864936
Pseudomonas syringae	2005.65	281.725	-1723.93	0.859534
Dechloromonas agitata	4742.32	3060.01	-1682.31	0.354744
Aeromonas allosaccharophila	1694.58	39.285	-1655.29	0.976817
Janthinobacterium sp. 64	1805.94	178.826	-1627.11	0.900979
Janthinobacterium svalbardensis	1806.37	215.543	-1590.82	0.880676
Acidovorax_unclassified	1924.64	338.654	-1585.98	0.824043
Pseudomonas sp. RIT357	1883.99	307.858	-1576.14	0.836593
Shewanella sp. ZOR0012	1561.82	2.56038	-1559.26	0.998361
Acidovorax caeni	2009.36	470.271	-1539.09	0.76596
Shewanella oneidensis	1539.13	3.83425	-1535.3	0.997509
Janthinobacterium sp. BJB426	1554.64	55.304	-1499.34	0.964427
Gammaproteobacteria_unclassified	1597.78	127.178	-1470.6	0.920403
Porphyromonadaceae bacterium CG2_30_38_12	1587.88	123.731	-1464.15	0.922078
Pseudomonas sp. PGPPP2	1733.21	274.288	-1458.92	0.841745
Pseudomonas phage 201phi2-1	1457.41	4.85754	-1452.55	0.996667
Rheinheimera sp. KL1	1411.48	2.25793	-1409.22	0.9984
Janthinobacterium sp. 61	1516.74	108.542	-1408.2	0.928437
Shewanella sp. Sh95	1390.72	2.87339	-1387.84	0.997934
Pseudomonas peli	1396.29	18.2947	-1378	0.986898
Shewanella sp. FDAARGOS_354	1363.11	2.96466	-1360.15	0.997825
Pseudomonas sp. Irchel 3H9	1581.9	251.4	-1330.5	0.841077
Chryseobacterium scophthalmum	1331.8	3.10281	-1328.69	0.99767
Prevotella sp. TF12-30	1347.54	47.1552	-1300.38	0.965006
Pseudomonas aeruginosa	1751.93	460.667	-1291.26	0.737051
Flavobacterium cucumis	1605.99	364.473	-1241.52	0.773054
Pseudomonas sp. 2995-1	1473.75	238.533	-1235.22	0.838146
Pseudomonas weihenstephanensis	1371.1	143.384	-1227.72	0.895424
Bacteroidales_unclassified	1324.65	100.317	-1224.33	0.924269
Macellibacteroides sp. HH-ZS	1306.34	94.3152	-1212.02	0.927802
Bacteroides vulgatus	1329.44	134.634	-1194.8	0.898728
Shewanella putrefaciens	1220.67	58.2821	-1162.39	0.952254
Malikia granosa	1619.21	457.763	-1161.45	0.717293
Janthinobacterium sp. BJB304	1200.28	69.5081	-1130.77	0.94209
Macromonas bipunctata	1199.07	87.4311	-1111.64	0.927084
Aeromonas sanarellii	1115.13	19.0249	-1096.11	0.982939
Bifidobacterium adolescentis	1105.57	48.4825	-1057.09	0.956147
Pseudomonas putida	1260.81	207.795	-1053.02	0.83519
Aeromonas salmonicida	1096.67	47.1915	-1049.47	0.956968
Subdoligranulum sp. APC924/74	1069.32	38.0658	-1031.25	0.964402
Pseudomonas sp. HAR-UPW-AIA-41	1109.48	79.5679	-1029.91	0.928283
Aeromonas hydrophila	1081.73	65.5683	-1016.17	0.939386
Bacteroides stercoris	1124.92	109.002	-1015.92	0.903103
Prevotella copri CAG:164	1026.09	29.3187	-996.775	0.971427
Bacteria_unclassified	1203.43	211.596	-991.832	0.824172
[Eubacterium] rectale	980.365	27.0477	-953.317	0.972411
Chryseobacterium indoltheticum	933.85	7.41892	-926.431	0.992056
Williamwhitmania taraxaci	948.963	42.9062	-906.056	0.954786
Janthinobacterium sp. BJB301	915.268	31.4327	-883.835	0.965657
Janthinobacterium sp. YR213	899.816	27.4521	-872.364	0.969491
Pseudomonas sp. DP16D-R1	1020.68	161.976	-858.707	0.841306
Janthinobacterium sp. BJB312	887.478	33.1478	-854.33	0.962649
Janthinobacterium sp. HH107	896.992	48.1981	-848.794	0.946267
Alistipes putredinis	961.107	113.059	-848.048	0.882366
Pseudomonas marginalis	918.697	73.1222	-845.575	0.920407
Janthinobacterium sp. 67	898.075	54.3171	-843.758	0.939518
Faecalibacterium prausnitzii	912.541	68.8738	-843.667	0.924525
Aquaspirillum serpens	886.275	49.0559	-837.219	0.944649
Aeromonas sobria	850.509	18.9056	-831.604	0.977771
Pseudomonas sp. PGPPP1	919.27	99.1228	-820.148	0.892172
Pseudomonas syringae group genomosp. 3	941.93	129.748	-812.182	0.862253
Pseudomonas sp. FEMGT703P	811.758	4.61722	-807.141	0.994312
Janthinobacterium sp. HH106	829.987	35.8355	-794.151	0.956824
Pseudomonas sp. LH1G9	877.578	118.808	-758.77	0.864618
Pseudomonadales bacterium RIFCSPHIGHO2_02_FULL_60_43	749.154	4.85735	-744.296	0.993516
Bacteroides uniformis	828.832	94.9762	-733.856	0.88541
Pseudomonadales bacterium RIFCSPLOWO2_12_59_9	742.569	9.20447	-733.364	0.987605
Klebsiella_unclassified	773.797	47.104	-726.693	0.939126
Comamonadaceae bacterium CCH12-A10	785.379	59.4686	-725.91	0.92428
Pseudomonas anguilliseptica	733.232	21.6593	-711.573	0.97046
Flavobacterium sp. 83	711.322	3.71694	-707.605	0.994775
Shewanella sp. POL2	685.889	1.6078	-684.281	0.997656
Sulfurospirillum sp. UCH001	760.637	90.6869	-669.95	0.880775
Pseudomonas chlororaphis	867.756	201.953	-665.802	0.767269
Flavobacterium hibernum	657.364	1.05564	-656.309	0.998394
Flavobacteria bacterium GWF1_32_7	1072.56	421.552	-651.009	0.606967
Pseudomonas simiae	749.61	102.272	-647.338	0.863567
Aeromonas media	686.87	41.4633	-645.407	0.939634
Pseudomonas endophytica	727.375	83.3284	-644.046	0.885439
Janthinobacterium sp. RA13	668.699	25.0136	-643.685	0.962594
Janthinobacterium sp. BJB446	660.012	18.2542	-641.758	0.972343
Janthinobacterium sp. HH104	675.425	35.2952	-640.13	0.947744
Bacteroidales bacterium 36-12	695.059	56.4237	-638.635	0.918822
Janthinobacterium sp. MP5059B	665.263	30.719	-634.544	0.953824
Pseudomonas poae	710.68	79.6993	-630.98	0.887855
Candidatus Propionivibrio aalborgensis	996.737	370.969	-625.768	0.627817
Janthinobacterium sp. ROICE36	686.88	64.6912	-622.189	0.905819
Bacteroides plebeius	657.065	36.5653	-620.5	0.944351
Paludibacter sp. 47-17	663.971	49.7243	-614.246	0.925111
Pseudomonas sp. MF4836	612.001	23.4076	-588.593	0.961752
Flavobacterium sp. AED	589.919	5.41859	-584.501	0.990815
Acinetobacter harbinensis	603.525	30.4171	-573.108	0.949601
Janthinobacterium sp. AD80	656.624	87.0053	-569.618	0.867496
Comamonas testosteroni	800.838	234.407	-566.431	0.707298
Janthinobacterium sp. KBS0711	593.122	30.9539	-562.168	0.947812
Pseudomonas synxantha	654.653	97.9477	-556.705	0.850382
Prevotella sp. AM42-24	564.434	10.5563	-553.878	0.981297
Janthinobacterium sp. Ant5-2-1	545.095	23.6269	-521.468	0.956655
Janthinobacterium sp. 1_2014MBL_MicDiv	573.704	52.8491	-520.855	0.907881
Paludibacter jiangxiensis	562.633	48.9679	-513.666	0.912967
Dialister sp. CAG:486	531.452	20.1123	-511.34	0.962156
Janthinobacterium sp. OK676	539.978	30.5566	-509.422	0.943411
Pseudomonas phage PhiPA3	515.079	7.23299	-507.846	0.985958
Pseudomonas sp. R9.37	544.19	39.206	-504.984	0.927955
Pseudomonas mohnii	613.684	109.228	-504.456	0.822013
Chryseobacterium balustinum	498.213	1.56838	-496.645	0.996852
Comamonas terrigena	497.979	18.3355	-479.643	0.96318
Acidovorax sp. ST3	534.914	62.7488	-472.165	0.882694
Pseudomonas sp. MIACH	519.833	51.6729	-468.16	0.900597
Methylotenera sp.	848.605	382.431	-466.174	0.549342
Zoogloea sp. LCSB751	1196.05	735.754	-460.295	0.384847
Arcobacter sp. L	463.254	4.71788	-458.536	0.989816
Bacteroides ovatus	502.28	44.4324	-457.848	0.911539
Aquaspirillum sp. LM1	605.807	159.31	-446.497	0.737029
Massilia_unclassified	495.16	48.9038	-446.257	0.901236
Aeromonas jandaei	468.023	26.2152	-441.808	0.943987
Pseudomonas sp. 1 R 17	471.297	30.3682	-440.929	0.935565
Pseudomonas frederiksbergensis	474.267	49.3304	-424.936	0.895986
Flavobacterium sp. HMWF030	424.375	1.09968	-423.275	0.997409
Flavobacteriia bacterium 40-80	506.679	87.1439	-419.535	0.82801
Klebsiella quasipneumoniae	438.26	25.2262	-413.034	0.94244
Pseudomonas sp. NFACC42-2	454.578	42.8863	-411.692	0.905657
Pseudomonas sp. MF6394	426.408	18.1022	-408.305	0.957547
Pseudomonas amygdali	464.623	61.2086	-403.414	0.868262
Pseudomonas sp. 8 R 14	425.786	24.2297	-401.556	0.943094
Pseudomonas alcaligenes	429.799	30.1892	-399.61	0.92976
Parabacteroides distasonis	426.923	30.5051	-396.418	0.928546
Shewanella decolorationis	394.982	1.83112	-393.151	0.995364
Aeromonas sp. YN13HZO-058	401.322	8.74702	-392.575	0.978204
Pararheinheimera mesophila	393.282	0.79767	-392.485	0.997972
Shewanella sp. WE21	408.035	15.8794	-392.156	0.961083
Brachymonas denitrificans	438.31	49.1283	-389.182	0.887914
Aeromonas sp. RU39B	413.265	25.63	-387.635	0.937982
Flavobacterium sp. 11	388.84	3.33617	-385.504	0.99142
Flavobacterium terrigena	411.542	26.5874	-384.954	0.935396
Pseudomonas sp. OV081	396.641	21.7966	-374.844	0.945047
Comamonadaceae_unclassified	481.772	111.322	-370.45	0.768932
Pseudomonas protegens	408.638	40.3718	-368.267	0.901204
Ruminococcus bromii	393.069	27.3748	-365.694	0.930356
Pedobacter sp. Hv1	403.499	38.1109	-365.388	0.905549
Akkermansia muciniphila	390.137	29.274	-360.863	0.924965
Collinsella aerofaciens	373.185	13.5536	-359.632	0.963681
Pseudomonas azotoformans	414.368	58.6822	-355.685	0.858381
Bacteroides luti	397.042	46.8949	-350.147	0.881889
Duganella sp. Leaf126	348.361	3.05423	-345.307	0.991233
Prevotella sp. CAG:386	348.419	4.53231	-343.887	0.986992
Bacteroidia bacterium 44-10	368.519	26.2027	-342.316	0.928897
Acidovorax sp. 62	385.299	43.9947	-341.304	0.885817
Pseudomonas sp. LG1D9	354.452	13.8431	-340.609	0.960945
Candidatus Fluviicola riflensis	585.533	246.834	-338.699	0.578445
Pseudomonas stutzeri	511.42	173.895	-337.525	0.659976
Pseudomonas sp. VI4.1	368.328	30.8312	-337.497	0.916294
Bacteroides xylanisolvens	360.958	25.5997	-335.359	0.929079
Acidovorax delafieldii	430.989	98.4347	-332.555	0.771608
Acidovorax sp. KKS102	403.5	71.3712	-332.129	0.82312
Gemmiger formicilis	350.518	18.9473	-331.571	0.945945
Pseudomonas costantinii	379.834	49.1028	-330.731	0.870726
Parvibaculum lavamentivorans	336.422	5.87759	-330.544	0.982529
Bacteroidetes bacterium 41-46	358.715	29.2509	-329.464	0.918456
Flavobacteria bacterium RIFCSPLOWO2_12_FULL_31_7	334.355	5.2255	-329.13	0.984371
Aeromonas taiwanensis	329.76	10.1174	-319.642	0.969319
Prevotella sp. 885	321.147	4.86812	-316.279	0.984841
Duganella phyllosphaerae	322.481	6.93578	-315.545	0.978492
Hydromonas sp. F02	347.701	33.8175	-313.884	0.90274
Phenylobacterium sp. Root700	373.89	60.9407	-312.949	0.837009
Pseudomonas mandelii	361.158	49.4969	-311.662	0.86295
Propionivibrio dicarboxylicus	1454.35	1143.02	-311.329	0.214067
Pseudomonas proteolytica	327.553	17.277	-310.276	0.947254
Prevotellamassilia timonensis	314.044	7.09666	-306.948	0.977402
uncultured Desulfovibrio sp.	383.712	77.3883	-306.324	0.798317
Flavobacteriaceae bacterium	343.038	37.6606	-305.378	0.890215
Aeromonas simiae	325.08	19.7051	-305.375	0.939384
Comamonas aquatica	436.508	131.657	-304.852	0.698386
Comamonas terrae	323.361	18.742	-304.619	0.94204
Parabacteroides merdae	342.979	39.2611	-303.718	0.885529
Succinatimonas sp. CAG:777	307.738	5.25786	-302.481	0.982915
Pseudomonas gingeri	311.4	12.0594	-299.341	0.961274
Flavobacterium succinicans	314.332	16.5475	-297.785	0.947357
Flavobacterium sp. YH5	390.178	94.3253	-295.853	0.758251
Mehylophilales bacterium 35-46-6	307.15	11.8023	-295.348	0.961575
Comamonadaceae bacterium SCN 68-20	415.518	120.566	-294.952	0.709841
Legionella feeleii	345.587	53.2642	-292.323	0.845873
Pseudomonas sp. 11/12A	347.737	58.791	-288.946	0.830932
Pseudomonas jessenii	341.888	53.1919	-288.696	0.844417
Pseudomonas sp. OV508	332.798	44.9512	-287.847	0.86493
Pseudochrobactrum asaccharolyticum	290.272	4.35236	-285.92	0.985006
Pseudomonas sp. OV286	336.004	50.7956	-285.209	0.848825
Acidovorax sp. 56	319.237	34.824	-284.413	0.890915
Porphyromonadaceae bacterium COT-184 OH4590	305.488	24.9332	-280.555	0.918382
Pseudomonas sp. LAB-08	322.688	42.6316	-280.056	0.867886
Leifsonia sp. Root4	317.375	40.5298	-276.845	0.872297
Klebsiella variicola	301.761	27.4945	-274.266	0.908886
Alistipes sp. CAG:435	287.839	16.5881	-271.251	0.94237
Pseudomonas antarctica	307.388	36.8107	-270.577	0.880247
Pseudomonas moraviensis	309.561	39.5493	-270.012	0.872241
Curvibacter lanceolatus	378.397	109.096	-269.301	0.711688
Pseudomonas sp. CF150	294.474	25.927	-268.547	0.911955
Shewanella sp. Shew256	268.34	1.44405	-266.896	0.994619
Giesbergeria anulus	361.389	96.1334	-265.255	0.733989
Janthinobacterium sp. 551a	413.99	152.489	-261.501	0.63166
Haemophilus pittmaniae	284.658	26.3372	-258.32	0.907478
Pseudomonas viridiflava	299.99	41.7171	-258.273	0.860938
uncultured prokaryote	305.555	50.4104	-255.144	0.83502
Aeromonas sp. ASNIH8	274.124	20.3546	-253.769	0.925747
Pseudomonas sp. CF161	275.836	22.7734	-253.062	0.917439
Pseudomonas sp. 22 E 5	291.995	40.381	-251.614	0.861707
Pseudomonas fuscovaginae	293.468	42.2204	-251.247	0.856133
Janthinobacterium sp. HH100	262.726	13.4967	-249.229	0.948628
Aeromonas schubertii	267.054	17.9672	-249.087	0.932721
Aeromonas diversa	263.181	14.1658	-249.015	0.946175
Aliiarcobacter butzleri	250.385	3.10929	-247.276	0.987582
Pseudomonas sp. S09G 359	286.665	41.5448	-245.12	0.855076
Aeromonas sp. L_1B5_3	255.438	13.887	-241.551	0.945634
Flavobacterium oncorhynchi	247.004	5.62231	-241.382	0.977238
Bacteroides thetaiotaomicron	255.697	17.4881	-238.209	0.931606
Pseudomonas sp. KG01	270.786	34.2524	-236.533	0.873507
Xanthomonas citri	316.127	79.8748	-236.253	0.747333
Pseudomonas sp. ES3-33	256.02	21.4647	-234.555	0.91616
Bacteroides dorei	257.188	22.7421	-234.446	0.911574
Pseudomonas mucidolens	265.365	31.505	-233.86	0.881277
Pseudomonas trivialis	269.874	36.7152	-233.159	0.863954
Pseudomonas brenneri	245.119	13.7995	-231.32	0.943703
Bacteroides caccae	250.147	19.4426	-230.704	0.922275
Pseudomonas sp. 06C 126	241.554	12.3292	-229.225	0.948959
Methylovorus sp. MP688	274.306	47.4939	-226.812	0.826858
Alishewanella jeotgali	241.233	19.1103	-222.122	0.920781
Pseudomonas panacis	259.622	37.7451	-221.877	0.854615
Shewanella sp. BC20	223.041	1.32734	-221.714	0.994049
Bacteroidetes oral taxon 274	236.811	17.2343	-219.576	0.927223
Alphaproteobacteria bacterium HGW-Alphaproteobacteria-11	220.564	1.09871	-219.466	0.995019
Curvibacter gracilis	295.553	76.5542	-218.999	0.74098
Porphyromonadaceae bacterium H1	238.875	20.8504	-218.025	0.912714
Pseudomonas sp. S3E12	236.431	19.1411	-217.29	0.919041
Pseudomonas phage Phabio	216.626	1.45679	-215.169	0.993275
Pseudomonas sp. FW300-N1A1	238.806	24.4988	-214.307	0.897411
Chryseobacterium sp. 5_R23647	217.282	3.62132	-213.66	0.983334
Pseudomonas cedrina	246.528	33.2487	-213.279	0.865132
Pseudomonas sp. LG1E9	245.274	32.5798	-212.694	0.867169
Paludibacter sp. SCN 50-10	226.687	15.0392	-211.648	0.933657
Flavobacterium johnsoniae	216.836	7.57866	-209.257	0.965049
Comamonas sp. 26	216.416	7.64047	-208.776	0.964695
Shewanella sp. ANA-3	207.264	1.16449	-206.099	0.994382
Flavobacterium haoranii	247.433	42.2591	-205.174	0.82921
Pseudomonas yamanorum	228.946	23.8414	-205.105	0.895865
Pseudomonas silesiensis	228.125	24.3045	-203.82	0.89346
Simplicispira psychrophila	223.129	19.9124	-203.217	0.910759
Bacteroides fragilis	230.098	27.3594	-202.738	0.881097
Pseudomonas sp. NS1(2017)	229.453	29.2286	-200.224	0.872616
Aeromonas sp. HMWF016	208.372	10.8255	-197.546	0.948047
Methylovorus glucosotrophus	224.155	27.7231	-196.432	0.876322
Pseudomonas tolaasii	229.271	33.9965	-195.275	0.851719
Pseudochrobactrum sp. B5	197.546	3.18925	-194.357	0.983856
Vibrio cholerae	211.104	19.5961	-191.508	0.907174
Pseudomonas orientalis	220.175	28.6893	-191.485	0.869697
Pseudomonas sp. Irchel s3h17	200.89	12.1503	-188.74	0.939518
Pseudomonas sp. K2I15	208.134	20.6438	-187.49	0.900815
Acidovorax sp. SCN 65-28	225.781	40.1738	-185.607	0.822067
Pararheinheimera texasensis	190.258	5.01199	-185.246	0.973657
Pseudomonas sp. MYb115	197.088	12.1447	-184.943	0.938379
Parabacteroides_unclassified	196.943	12.9286	-184.014	0.934353
Pseudomonas batumici	203.445	20.6823	-182.763	0.89834
Bifidobacterium longum	191.225	8.55782	-182.667	0.955247
Prevotella sp. Marseille-P4119	185.116	3.0181	-182.098	0.983696
Achromobacter marplatensis	194.045	12.296	-181.749	0.936633
Aeromonas sp. ASNIH2	191.603	11.4198	-180.183	0.940399
Pseudomonas sp. GL93	198.731	18.5529	-180.178	0.906643
Pseudomonas sp. FH1	207.778	27.6366	-180.141	0.86699
Shewanella bicestrii	180.413	1.31242	-179.101	0.992725
Bacteroidales bacterium 45-6	189.26	11.3191	-177.941	0.940193
Pseudomonas sp. IB20	201.561	24.7361	-176.825	0.877278
Shewanella sp. SACH	207.529	31.5534	-175.976	0.847957
Chryseobacterium piscium	177.129	1.29966	-175.829	0.992663
Bifidobacterium ruminantium	176.993	1.90754	-175.085	0.989222
Pseudomonas sp. FDAARGOS_380	185.086	10.8636	-174.222	0.941305
Chryseobacterium hominis	201.538	28.9665	-172.572	0.856273
Glaciimonas sp. PCH181	194.013	21.4994	-172.513	0.889186
Desulfovibrio desulfuricans	201.014	29.6643	-171.35	0.852427
Pedobacter namyangjuensis	195.006	25.2876	-169.718	0.870324
Pseudomonas coronafaciens	197.716	29.6025	-168.114	0.850278
Arcobacter_unclassified	169.155	1.80261	-167.352	0.989343
Flavobacterium soli	170.359	4.69087	-165.668	0.972465
Photobacterium damselae	181.018	16.2028	-164.816	0.910491
Chlamydia trachomatis	184.82	20.5142	-164.305	0.889004
Aeromonas sp. CU5	167.888	3.63262	-164.256	0.978363
Pseudomonas brassicacearum	210.021	46.6206	-163.4	0.778019
Pseudomonas sp. CHM02	201.818	39.1599	-162.658	0.805964
Pseudomonas sp. NZIPFR-PS2	189.163	26.6984	-162.465	0.858861
Pseudomonas sp. NFR02	179.313	17.5918	-161.721	0.901893
Aeromonas sp. SCS5	170.562	10.0815	-160.481	0.940892
Flavobacteria bacterium BAL38	501.104	341.227	-159.877	0.319049
Pseudomonas gessardii	170.887	11.9531	-158.934	0.930053
Pseudomonas sp. BTN1	174.467	16.303	-158.164	0.906556
Pseudomonas sp. MWU13-2860	172.898	15.0453	-157.853	0.912982
Janthinobacterium sp. BJB1	186.022	28.2135	-157.808	0.848332
Pseudomonas savastanoi	185.781	29.3328	-156.448	0.842111
Pseudomonas mendocina	179.621	23.3526	-156.268	0.869989
Aeromonas enteropelogenes	165.955	10.2533	-155.701	0.938216
Massilia violaceinigra	166.522	10.9395	-155.583	0.934306
Methylotenera mobilis	209.734	55.0998	-154.634	0.737287
Pseudomonas sp. GV047	174.155	19.657	-154.498	0.887129
Clostridiales_unclassified	166.776	12.41	-154.366	0.925589
Prevotella stercorea	154.697	1.79721	-152.9	0.988382
Aeromonas sp. EERV15	156.203	3.47277	-152.73	0.977768
Rheinheimera sp. A13L	152.975	0.554213	-152.42	0.996377
Aeromonas sp. ASNIH1	164.722	12.4805	-152.241	0.924233
Blautia obeum	158.787	6.79434	-151.993	0.957211
Flavobacterium psychrophilum	183.691	32.1697	-151.521	0.82487
Paraburkholderia monticola	154.172	3.62745	-150.544	0.976471
Acidovorax sp. 99	185.613	35.1371	-150.476	0.810697
Alphaproteobacteria bacterium HGW-Alphaproteobacteria-3	161.124	10.978	-150.146	0.931866
Shewanella sp. MR-7	152.622	2.51021	-150.112	0.983553
Pseudomonas sp. ATCC PTA-122608	167.539	17.4844	-150.054	0.89564
Pseudomonas sp. QTF5	185.643	35.6323	-150.01	0.80806
Shewanella sp. MR-4	150.553	1.65729	-148.895	0.988992
Pseudomonas sp. ICMP 8385	159.809	11.3984	-148.41	0.928675
Pseudomonas migulae	166.435	18.3951	-148.04	0.889476
Pseudomonas delhiensis	159.016	11.4026	-147.613	0.928293
Achromobacter xylosoxidans	311.429	164.303	-147.126	0.472423
Acinetobacter baumannii	287.832	141.082	-146.75	0.509845
Flavobacterium lindanitolerans	148.748	2.22685	-146.521	0.985029
Alphaproteobacteria bacterium HGW-Alphaproteobacteria-12	156.424	10.5212	-145.903	0.93274
Pseudomonas rhodesiae	164.42	19.0456	-145.375	0.884165
Bacteroides coprocola	155.694	10.3254	-145.368	0.933682
Pseudomonas prosekii	167.003	21.9352	-145.068	0.868654
Pseudomonas sp. PAMC 25886	159.554	14.8316	-144.723	0.907044
Pseudomonas canadensis	168.442	23.9516	-144.49	0.857805
Pseudomonas salomonii	179.146	35.5544	-143.592	0.801534
Flavobacterium aciduliphilum	170.318	27.9561	-142.362	0.83586
Pseudomonas phage PMBT14	141.361	0.138846	-141.223	0.999018
Achromobacter sp. KAs 3-5	174.771	33.6824	-141.089	0.807277
Prevotella sp. CAG:5226	144.495	3.61831	-140.877	0.974959
Massilia oculi	158.03	17.6346	-140.396	0.88841
Brachymonas chironomi	165.159	27.9384	-137.221	0.83084
Burkholderia sp. RPE67	183.208	46.2426	-136.965	0.747595
Pseudomonas sp. S5D5	160.831	24.7706	-136.061	0.845984
Prevotella sp. CAG:604	138.467	2.48249	-135.984	0.982072
Bacteroides sp. OM05-10AA	146.826	10.9104	-135.916	0.925692
Aeromonas sp. ASNIH5	144.19	9.29483	-134.895	0.935538
Pseudomonas libanensis	147.869	14.0739	-133.795	0.904822
Pseudomonas benzenivorans	137.384	3.94602	-133.438	0.971277
Burkholderiales bacterium 21-58-4	140.446	8.71152	-131.735	0.937973
Pseudomonas borbori	137.176	5.54731	-131.628	0.959561
Methylotenera sp. 24-45-7	132.913	3.17132	-129.742	0.97614
Pseudomonas resinovorans	138.191	9.27569	-128.915	0.932878
Flavobacterium xinjiangense	132.805	3.90591	-128.899	0.970589
Pseudomonas sp. QS1027	132.937	4.81904	-128.118	0.96375
Pseudomonas palleroniana	148.524	20.8496	-127.674	0.859621
Aeromonas sp. ASNIH3	138.669	11.0228	-127.646	0.92051
Janthinobacterium sp. Marseille	194.478	67.0258	-127.452	0.655355
Pseudomonas sp. TKP	152.921	25.8601	-127.06	0.830892
Pseudomonas sp. FSL W5-0203	140.198	13.3372	-126.86	0.904868
Janthinobacterium sp. BJB303	159.93	34.3296	-125.6	0.785346
Pseudomonas sp. OV467	135.908	10.4364	-125.471	0.92321
Pseudomonas taeanensis	128.285	3.15846	-125.127	0.975379
Shewanella sp. Pdp11	143.094	18.4969	-124.597	0.870736
Aeromonas sp. HMWF015	129.17	4.60677	-124.564	0.964336
Pseudomonas sp. HMWF006	148.895	24.6908	-124.204	0.834173
Aquabacterium sp. NJ1	205.647	81.787	-123.86	0.602295
Parabacteroides sp. 20_3	131.296	7.85434	-123.442	0.940178
Curvibacter putative symbiont of Hydra magnipapillata	236.277	113.626	-122.651	0.519097
Pseudomonas sp. 2822-17	138.263	16.4519	-121.811	0.88101
Janthinobacterium agaricidamnosum	135.408	14.1347	-121.274	0.895614
Duganella sp. BJB476	130.583	9.42368	-121.16	0.927834
Pseudomonas sp. RIT-PI-q	134.858	14.472	-120.386	0.892687
Pseudomonas sp. TAD18	138.703	18.6079	-120.095	0.865844
Burkholderiales bacterium RIFCSPLOWO2_12_FULL_64_99	130.078	11.8117	-118.267	0.909196
Flavobacterium psychrolimnae	119.793	2.17675	-117.616	0.981829
Cupriavidus sp. IDO	124.183	6.84668	-117.336	0.944866
Eubacterium sp. CAG:202	117.741	1.62059	-116.121	0.986236
Polynucleobacter sp. 17-46-58	129.254	13.2743	-115.98	0.897301
Flavobacterium sp. F52	119.962	4.13139	-115.83	0.965561
Pseudochrobactrum sp. AO18b	117.114	1.6497	-115.464	0.985914
Pseudomonas pseudoalcaligenes	153.466	38.3286	-115.137	0.750247
Pseudomonas lactis	125.479	10.7351	-114.743	0.914446
Acidovorax defluvii	158.79	44.3811	-114.409	0.720505
Aeromonas dhakensis	120.194	6.45275	-113.741	0.946314
Pseudomonas sp. NC02	121.028	8.62006	-112.408	0.928776
Flavobacterium sp. Kopri-42	120.018	7.74901	-112.269	0.935435
Succinivibrio sp.	114.3	2.07112	-112.229	0.98188
Pseudomonas sp. MPR-ANC1	134.003	22.2366	-111.766	0.834058
Acidovorax soli	137.942	26.6804	-111.262	0.806583
Flavobacterium tistrianum	113.07	1.83526	-111.235	0.983769
Pseudomonas sp. URHB0015	114.356	3.43465	-110.921	0.969965
Pseudomonas extremorientalis	122.406	11.5249	-110.881	0.905847
Pseudomonas sp. CFII64	125.508	15.0447	-110.463	0.88013
Pseudomonas paralactis	121.274	10.8387	-110.435	0.910626
Acidovorax sp. BoFeN1	152.783	42.9515	-109.831	0.718872
Pseudomonas sp. HMWF031	127.539	17.9265	-109.613	0.859444
Pseudomonas abietaniphila	122.809	13.8401	-108.969	0.887304
Burkholderiales bacterium RIFCSPLOWO2_12_FULL_65_40	189.904	81.2563	-108.648	0.57212
Flavobacterium sp. Leaf359	110.239	1.738	-108.501	0.984234
Acidovorax carolinensis	192.502	84.531	-107.971	0.560882
Bacteroides sp. 4_1_36	121.322	13.5893	-107.733	0.88799
Pseudomonas sp. bs2935	117.884	10.433	-107.451	0.911498
Aeromonas finlandiensis	111.157	3.77671	-107.381	0.966024
Pseudomonas sp. ICMP 19500	115.845	8.88514	-106.96	0.923301
Pseudomonas sp. BMS12	108.173	2.34717	-105.826	0.978302
Flavobacterium sp. A7.6	106.05	0.504269	-105.546	0.995245
Chryseobacterium sp. MOF25P	104.905	0.0659785	-104.839	0.999371
Bacteroidetes_unclassified	118.787	14.4083	-104.379	0.878705
Pseudomonas sp. OV546	119.749	15.8154	-103.933	0.867928
Pseudomonas sp. NFPP02	111.192	7.31635	-103.875	0.9342
Flavobacterium ginsenosidimutans	104.775	1.00323	-103.772	0.990425
Methylovorus_unclassified	153.477	50.4432	-103.034	0.671331
Shewanella benthica	111.101	8.26484	-102.837	0.92561
Pseudomonas sp. BBP2017	111.729	9.61912	-102.11	0.913907
Pseudomonas sp. CC6-YY-74	104.849	2.75647	-102.093	0.97371
Sulfurospirillum multivorans	108.855	6.93719	-101.918	0.936272
Janthinobacterium sp. GW458P	114.354	12.8011	-101.553	0.888058
Pseudomonas sp. AP19	129.199	28.2637	-100.935	0.781239
Shewanella mangrovi	109.311	8.43618	-100.875	0.922824
Flavobacterium cauense	142.622	42.8167	-99.8056	0.69979
Pseudomonas sp. GV105	117.109	17.7582	-99.3507	0.848362
Bacteroides salanitronis	101.454	2.22626	-99.2277	0.978056
Pseudomonas sp. MWU12-2115	107.037	8.04447	-98.9925	0.924844
Flavobacterium sp. LM5	100.282	2.58609	-97.6956	0.974212
Collinsella_unclassified	101.19	3.73465	-97.4549	0.963092
Pseudomonas sp. 31-12	108.537	11.2663	-97.2704	0.896198
Herminiimonas arsenitoxidans	124.041	26.9936	-97.0471	0.782381
Bacteroidales bacterium CF	106.867	9.96486	-96.9022	0.906755
Collimonas_unclassified	98.3773	1.72841	-96.6489	0.982431
Providencia stuartii	103.576	6.99385	-96.5819	0.932476
Pseudomonas agarici	112.654	16.0845	-96.57	0.857223
Pseudomonas kilonensis	113.115	16.8189	-96.2962	0.851312
Legionella adelaidensis	124.019	28.3201	-95.6987	0.771647
Flavobacterium anhuiense	96.0481	0.38811	-95.66	0.995959
Diaphorobacter sp. LR2014-1	134.845	39.4587	-95.3865	0.707378
Pseudomonas sp. G5(2012)	108.095	12.7508	-95.3437	0.88204
Pseudomonas sp. GM48	112.639	18.0258	-94.6136	0.839969
Pseudomonas sp. Ag1	101.192	6.58624	-94.6058	0.934913
Pseudomonas sp. GM49	114.311	19.7125	-94.5989	0.827555
Aliiarcobacter skirrowii	95.6858	1.24666	-94.4391	0.986971
Pseudomonas moorei	115.483	21.052	-94.4308	0.817704
Pseudomonas alkylphenolica	98.9655	4.97626	-93.9892	0.949717
Janthinobacterium sp. S3-2	111.806	18.8253	-92.9803	0.831625
Flavobacterium lacus	101.009	8.27392	-92.7348	0.918087
Aquabacterium olei	119.965	27.348	-92.6173	0.772034
Collinsella sp. OM06-18AC	95.3624	3.09488	-92.2676	0.967546
Pseudomonas sp. GM67	107.776	15.5257	-92.2498	0.855944
Flavobacterium sp. 2	94.2811	2.63217	-91.6489	0.972082
Pseudomonas sp. AD21	106.708	15.1196	-91.5888	0.858309
Pseudomonas sp. GM60	106.989	15.4139	-91.5747	0.855929
Flavobacterium ummariense	93.3015	2.42795	-90.8736	0.973977
Pseudomonas lurida	103.685	12.9237	-90.7615	0.875356
Pseudomonas vancouverensis	101.709	11.1127	-90.5961	0.89074
Pseudomonas sp. HMWF021	107.269	16.8724	-90.3968	0.84271
Pseudomonas phage phi-2	90.0569	0.0288753	-90.028	0.999679
Vibrio parahaemolyticus	129.372	39.4064	-89.9652	0.695401
Pseudomonas reinekei	98.6704	8.81652	-89.8539	0.910647
Aeromonas sp. 62-46	95.4497	5.83419	-89.6155	0.938877
Flavobacterium nitrogenifigens	90.1666	0.851875	-89.3147	0.990552
Aeromonas sp. HZM	94.7016	5.43239	-89.2692	0.942637
Pseudomonas umsongensis	107.886	18.6269	-89.2591	0.827347
Flavobacterium sp. 38-13	90.0793	0.986566	-89.0927	0.989048
Pseudomonas sp. P1.8	100.736	12.0362	-88.6996	0.880517
Pseudomonas arsenicoxydans	97.5768	9.38644	-88.1904	0.903805
Elizabethkingia anophelis	114.435	26.7814	-87.6531	0.765967
Pseudomonas sp. PH1b	92.8761	5.26881	-87.6073	0.943271
Burkholderiales_unclassified	127.919	40.3365	-87.5829	0.684673
Pseudomonas sp. ICMP 460	100.385	12.8857	-87.4989	0.871636
Aeromonas fluvialis	91.5662	4.13005	-87.4362	0.954896
Shigella sonnei	94.5686	7.73962	-86.829	0.918159
Pseudomonas virus phiKZ	87.0795	0.394445	-86.6851	0.99547
Pseudomonas sp. MWU12-2312b	98.9219	12.5524	-86.3694	0.873108
Chryseobacterium antarcticum	87.6671	1.52804	-86.139	0.98257
Pseudomonas sp. AP42	89.4097	3.9925	-85.4172	0.955346
Pseudomonas sp. Eur1 9.41	96.3937	11.0192	-85.3744	0.885685
Flavobacterium sinopsychrotolerans	88.6282	3.31146	-85.3167	0.962637
Pseudomonas sp. Root9	90.6129	5.51584	-85.097	0.939127
Pseudomonas sp. PAMC 26793	92.5228	7.56034	-84.9624	0.918287
Aeromonas aquatica	89.1514	4.65129	-84.5001	0.947827
Aeromonas australiensis	88.0286	3.5813	-84.4473	0.959317
Subdoligranulum sp. 60_17	88.5683	4.23692	-84.3314	0.952162
Pseudomonas sp. SCPG-7	97.5763	13.4156	-84.1606	0.862511
Pseudomonas laurylsulfatovorans	96.9377	13.0204	-83.9173	0.865683
Betaproteobacteria bacterium HGW-Betaproteobacteria-22	110.88	27.1036	-83.7767	0.75556
Pseudomonas sp. FFUP_PS_473	93.4044	9.94429	-83.4601	0.893535
Pseudomonas sp. GZJR-8	88.2982	4.90913	-83.3891	0.944403
uncultured Caudovirales phage	106.273	23.1625	-83.1108	0.782048
Pseudomonas sp. 443	98.2063	15.2293	-82.9771	0.844926
Tolumonas_unclassified	88.1685	5.42016	-82.7483	0.938525
Delftia_unclassified	118.928	36.2249	-82.7035	0.695406
Aeromonas sp. DNP9	85.757	3.77447	-81.9825	0.955986
Alistipes putredinis CAG:67	92.7048	11.0895	-81.6153	0.880379
Candidatus Saccharibacteria bacterium 32-50-10	163.731	82.3275	-81.4034	0.497178
Aeromonas encheleia	86.4363	5.38762	-81.0487	0.937669
Pseudomonas sp. OV529	88.2718	7.23267	-81.0392	0.918064
Pseudomonas oryzae	93.2311	12.2556	-80.9755	0.868546
Bacteroides sp. D20	91.8846	11.0439	-80.8407	0.879806
Pseudomonas sp. GM78	90.736	10.0471	-80.6888	0.889271
Acidovorax sp. GW101-3H11	126.613	46.2144	-80.3983	0.634994
Pseudomonas sp. Irchel 3A7	92.1529	11.8156	-80.3374	0.871783
Pseudomonas sp. QC2	93.37	13.1554	-80.2146	0.859104
Corynebacterium urealyticum	105.036	25.0907	-79.9452	0.761123
Acidovorax sp. NO-1	138.048	58.2357	-79.812	0.578148
Flavobacterium glaciei	86.4085	6.9565	-79.452	0.919493
Flavobacterium croceum	98.5142	19.5533	-78.9609	0.801518
Methylotenera sp. RIFCSPLOWO2_02_FULL_45_14	126.843	47.9982	-78.8445	0.621593
Beta vulgaris	141.445	62.9665	-78.4784	0.554834
Flavobacterium sp. ACN2	79.6393	1.29037	-78.3489	0.983797
Pseudomonas sp. NFACC25	87.9286	9.71924	-78.2094	0.889464
Pseudomonas sp. 25 R 14	82.6129	4.61595	-77.9969	0.944126
Pseudomonas baetica	89.9498	12.0855	-77.8643	0.865641
Chryseobacterium haifense	90.4392	12.5964	-77.8429	0.86072
Pseudomonas sp. PE-S1G-1	84.435	6.93262	-77.5024	0.917894
Pseudomonas sp. PICF141	92.8503	15.3586	-77.4917	0.834588
Flavobacterium columnare	91.6406	14.4656	-77.1749	0.842148
Aeromonas cavernicola	84.2291	7.17974	-77.0494	0.914759
Aeromonas sp. ARM81	82.037	5.07941	-76.9576	0.938084
Bacteroides stercoris CAG:120	84.7696	7.86801	-76.9016	0.907184
Fluviicola taffensis	258.632	181.838	-76.7941	0.296924
Acidovorax sp. HMWF029	93.9664	17.2304	-76.736	0.816632
Aeromonas lusitana	81.3538	4.89169	-76.4621	0.939871
Pseudomonas sp. 2588-5	86.0688	9.71653	-76.3523	0.887107
Aeromonas rivuli	80.7294	4.39744	-76.332	0.945529
uncultured Ruminococcus sp.	84.9346	8.75628	-76.1783	0.896906
Pseudomonas sp. GM21	84.9557	8.99566	-75.9601	0.894114
Flavobacterium urocaniciphilum	91.7347	15.8696	-75.8652	0.827006
Acinetobacter_unclassified	92.4353	16.7868	-75.6485	0.818394
Pseudomonas sp. ERMR1:02	86.2886	11.005	-75.2836	0.872463
Collinsella sp. TF07-1	78.0613	3.04438	-75.0169	0.961
Acidovorax sp. RAC01	135.624	60.6932	-74.9307	0.552489
Pseudochrobactrum_unclassified	74.8639	0.111324	-74.7526	0.998513
Flavobacterium frigidimaris	74.8295	0.113457	-74.7161	0.998484
Pseudomonas sp. DR 5-09	87.1842	12.7983	-74.3859	0.853204
Pseudomonas xanthomarina	84.5764	10.252	-74.3244	0.878784
Pseudomonas sp. 424	85.7811	11.5976	-74.1835	0.8648
Bacteroides eggerthii	80.7121	6.7515	-73.9606	0.916351
Pseudomonas sp. WCHPs060044	78.0314	4.83691	-73.1945	0.938013
Collinsella sp. OM04-5	75.7487	2.57071	-73.178	0.966063
Flavobacterium sp. HYN0056	73.5985	0.56216	-73.0364	0.992362
Pseudomonas monteilii	85.9448	13.6435	-72.3013	0.841253
Campylobacter sputorum	74.5928	2.80701	-71.7858	0.962369
Pseudomonas sp. ML96	73.6592	1.95229	-71.7069	0.973496
Acidovorax sp. SD340	108.668	37.2566	-71.4111	0.657151
Collinsella sp. TF08-11AT	74.2601	2.87044	-71.3897	0.961346
Bacteroides massiliensis	79.2981	7.99004	-71.308	0.89924
Pseudomonas sp. Irchel s3b2	85.3755	14.0762	-71.2993	0.835126
Pseudomonas sp. Os17	81.7896	11.1484	-70.6413	0.863695
Pseudomonas guangdongensis	79.2966	8.68434	-70.6123	0.890483
Pseudomonas sp. 2822-15	79.0122	8.74178	-70.2704	0.889362
Methylotenera sp. L2L1	78.1529	7.88548	-70.2674	0.899102
Pseudomonas sp. GM55	84.0345	13.8482	-70.1863	0.835208
Pseudomonas mediterranea	77.8333	7.80464	-70.0286	0.899726
Blautia wexlerae	73.8008	3.81069	-69.9902	0.948365
uncultured Bacteroides sp.	74.9204	5.01599	-69.9044	0.933049
Collinsella sp. TF06-26	72.2769	2.48105	-69.7959	0.965673
Pseudomonas sp. GM79	84.4837	14.8027	-69.681	0.824786
Aeromonas sp. ZOR0001	72.7979	3.19547	-69.6024	0.956105
Escherichia_unclassified	76.3937	6.9091	-69.4846	0.909559
Pseudomonas sp. ZYSR67-Z	74.2658	4.78964	-69.4762	0.935507
Flavobacterium phragmitis	72.6726	3.22857	-69.4441	0.955574
beta proteobacterium L13	86.7102	17.4125	-69.2977	0.799188
Shigella flexneri	76.4414	7.27572	-69.1657	0.90482
Dysgonamonadaceae bacterium	79.3848	10.3676	-69.0172	0.869401
Aliiarcobacter cibarius	69.9797	0.985296	-68.9944	0.98592
Pseudomonas lini	79.0357	10.0679	-68.9678	0.872616
Bacteroides plebeius CAG:211	72.9546	4.24136	-68.7133	0.941863
Aeromonas molluscorum	72.6816	3.97553	-68.7061	0.945302
Pseudomonas corrugata	78.2402	9.64844	-68.5918	0.876682
Pseudomonas sp. OV226	76.2487	7.93822	-68.3104	0.89589
Pseudomonas sp. In5	77.0232	10.0448	-66.9784	0.869587
Bacteroidetes bacterium GWB2_41_8	121.88	55.4658	-66.4142	0.544915
Prevotella sp. CAG:520	67.4948	1.10001	-66.3948	0.983702
Flavobacterium sp. KBS0721	66.9102	0.708533	-66.2017	0.989411
Aeromonas tecta	69.6995	3.90394	-65.7956	0.943989
Chromatiales bacterium RIFOXYA1_FULL_46_5	65.6916	0.173613	-65.518	0.997357
Pseudomonas sp. ICMP 564	73.0941	7.63808	-65.4561	0.895504
Collinsella sp. TF05-9AC	67.6343	2.35185	-65.2825	0.965227
Aeromonas rivipollensis	69.309	4.09546	-65.2135	0.94091
Janthinobacterium sp. PC23-8	103.525	38.5843	-64.9407	0.627295
Pseudomonas sp. UW4	76.7582	11.8982	-64.86	0.844991
Pseudomonas sp. R37(2017)	70.4959	5.67504	-64.8208	0.919498
Collinsella sp. TF11-5AC	67.3215	2.54431	-64.7771	0.962207
Prevotella_unclassified	67.4176	2.71645	-64.7012	0.959707
Chryseobacterium hispanicum	75.6695	11.0238	-64.6457	0.854317
Alistipes sp. CAG:514	68.0155	3.4528	-64.5627	0.949235
Pseudomonas phage PaBG	70.5751	6.53618	-64.0389	0.907387
Bacteroides sp. 4_3_47FAA	70.9008	6.8971	-64.0037	0.902722
uncultured Clostridium sp.	71.8357	8.48852	-63.3472	0.881834
Pseudomonas sp. ABAC61	71.5108	8.58279	-62.928	0.879979
Alicycliphilus sp. B1	80.7405	17.8251	-62.9154	0.77923
Pseudomonas sp.	78.5293	15.6737	-62.8556	0.80041
Pseudomonas sp. Irchel s3h14	73.454	10.8776	-62.5764	0.851913
Pseudomonas sp. Ant30-3	68.7926	6.24519	-62.5474	0.909217
Pseudomonas sp. 478	68.8036	6.59412	-62.2094	0.90416
Bacteroides sp. 3_1_33FAA	79.5779	17.3804	-62.1975	0.781592
Pseudomonas sp. FH4	67.2062	5.1533	-62.0529	0.923321
Pedobacter insulae	89.5181	27.7834	-61.7347	0.689633
Pseudomonas sp. TCU-HL1	68.1281	6.46897	-61.6591	0.905047
Pseudomonas sp. ACN8	73.6458	12.0961	-61.5497	0.835753
uncultured Pseudomonadales bacterium HF0500_12O04	75.2637	13.8667	-61.397	0.815758
Streptococcus minor	66.5283	5.28769	-61.2406	0.92052
Aquabacterium parvum	74.0563	13.1276	-60.9287	0.822735
Bacteroides coprophilus	65.0269	4.19613	-60.8308	0.935471
Pseudomonas sp. Root329	70.4868	9.9283	-60.5585	0.859147
Bacteroides finegoldii	65.8242	5.36837	-60.4558	0.918444
Prevotella sp. CAG:732	61.8484	1.43809	-60.4104	0.976748
Pseudomonas sp. GM18	73.9248	13.6172	-60.3075	0.815796
Pseudomonas sp. DSM 29142	68.5436	8.25694	-60.2866	0.879537
Rheinheimera sp. F8	62.1251	1.8858	-60.2393	0.969645
Aeromonas sp. ZOR0002	63.7135	3.84214	-59.8714	0.939697
Vibrio vulnificus	67.8844	8.25573	-59.6287	0.878385
Bifidobacterium_unclassified	62.3768	2.81288	-59.5639	0.954905
Chryseobacterium taklimakanense	70.2648	10.8311	-59.4337	0.845852
Chryseobacterium sp. FP211-J200	69.671	10.4556	-59.2154	0.849929
Pseudomonas sp. HLS-6	62.8305	3.8728	-58.9577	0.938361
Burkholderiales bacterium 68-12	107.416	48.5523	-58.864	0.547999
Pseudomonas sp. GM30	69.6676	11.2665	-58.4011	0.838282
Pseudomonas indica	63.0055	5.04984	-57.9557	0.919851
Pseudomonas sp. NFR09	65.7971	7.95454	-57.8425	0.879105
Shewanella sp. W3-18-1	62.7044	4.90802	-57.7964	0.921728
Pseudomonas fluvialis	59.9811	2.21193	-57.7692	0.963123
Janthinobacterium sp. HH103	61.0734	3.47514	-57.5983	0.943099
Pseudomonas sp. NFIX28	61.4139	3.83047	-57.5834	0.937629
Pseudomonas asplenii	67.2946	9.87937	-57.4153	0.853192
Arcobacter sp. LMG 29976	57.7246	0.655589	-57.069	0.988643
Bacteroidetes bacterium GWC2_46_850	64.0329	7.01932	-57.0136	0.890379
Pseudomonas sp. 28 E 9	62.5256	5.56036	-56.9653	0.911071
Pseudomonas sp. PIC25	59.9558	3.19739	-56.7584	0.946671
Pseudomonas sp. GM50	63.6017	6.93584	-56.6658	0.890949
Pseudomonas sp. OV577	71.0926	14.541	-56.5516	0.795464
Prevotella stercorea CAG:629	56.9479	0.453648	-56.4943	0.992034
Flavobacterium sp. FPG59	61.501	5.03756	-56.4634	0.91809
Flavobacterium gelidilacus	67.8488	11.4124	-56.4364	0.831796
Pseudomonas sp. NFPP24	63.6826	7.26918	-56.4134	0.885853
Collinsella sp. TM06-3	58.2925	1.95487	-56.3376	0.966464
Pseudomonas sp. Irchel 3E13	60.4845	4.47908	-56.0054	0.925947
Bacteroides faecis	58.5459	2.57725	-55.9686	0.955979
Flavobacterium aquidurense	56.2175	0.293405	-55.9241	0.994781
Pseudomonas sp. CFT9	61.134	5.70048	-55.4335	0.906754
Acidovorax sp. 69	77.661	22.3539	-55.3071	0.712161
Collinsella sp. TM04-9	57.2131	2.10532	-55.1078	0.963202
Comamonas_unclassified	58.4652	3.57189	-54.8933	0.938906
Tepidicaulis marinus	57.9325	3.41002	-54.5225	0.941138
[Ruminococcus] torques	57.9091	3.41062	-54.4985	0.941104
Plesiomonas shigelloides	61.6005	7.10555	-54.495	0.884651
Aeromonas lacus	57.2724	2.9538	-54.3186	0.948425
Acidovorax sp. SCN 65-108	65.151	10.8561	-54.2949	0.833371
Bacteroides sp. OM05-12	59.3635	5.22983	-54.1337	0.911902
Janthinobacterium sp. CG3	117.202	63.1908	-54.0109	0.460837
Flavobacterium sp. HYN0086	54.1922	0.252423	-53.9398	0.995342
Pseudomonas sp. Irchel s3f7	59.476	5.57022	-53.9058	0.906345
Pseudomonas sp. FSL W5-0299	65.6255	11.8727	-53.7529	0.819085
Flavobacterium sp. ACN6	54.4466	0.801426	-53.6452	0.985281
Flavobacterium aurantiibacter	64.0244	10.4787	-53.5457	0.836333
Collinsella sp. TF10-11AT	55.3786	1.99009	-53.3886	0.964064
Flavobacterium sp. IMCC34758	56.1215	2.86481	-53.2567	0.948954
Comamonas composti	64.2061	11.0723	-53.1339	0.827551
Corchorus olitorius	59.8334	6.70103	-53.1324	0.888005
Flavobacterium piscis	53.2501	0.285968	-52.9641	0.99463
Pseudomonas virus EL	52.888	0.0203793	-52.8676	0.999615
Sutterella wadsworthensis	61.8292	9.04328	-52.7859	0.853738
Ruminococcus sp. CAG:108	56.222	3.59514	-52.6268	0.936055
Pseudomonas sp. GR 6-02	60.8509	8.28969	-52.5612	0.86377
Acidovorax kalamii	94.7887	42.2364	-52.5523	0.554415
Pseudomonas sp. HMSC05H02	61.8847	9.45233	-52.4324	0.847259
Pseudomonas plecoglossicida	69.7618	17.3319	-52.4299	0.751556
Pseudomonas donghuensis	61.3389	8.91159	-52.4273	0.854716
Flavobacterium sp. Root935	52.4221	0.0213093	-52.4007	0.999594
Zobellella denitrificans	57.6117	5.47377	-52.1379	0.904989
Pseudomonas sp. H1h	61.159	9.24741	-51.9116	0.848797
Pseudomonas sp. ARP3	54.496	3.13515	-51.3608	0.94247
Pseudomonas sp. 31 R 17	58.2742	6.95514	-51.3191	0.880648
Bacteroidia bacterium 43-41	57.6929	6.59933	-51.0935	0.885613
Aeromonas bestiarum	54.7071	3.67	-51.0371	0.932915
Acidaminococcus_unclassified	55.3996	4.53047	-50.8691	0.918222
Janthinobacterium sp. 344	73.1484	22.4025	-50.7459	0.693739
uncultured beta proteobacterium HF0010_04H24	54.9414	4.25917	-50.6822	0.922478
Pseudomonas segetis	59.5735	9.05538	-50.5181	0.847996
Bacteroides sp. AM25-34	57.3356	6.94816	-50.3874	0.878816
Bacteroidetes bacterium HGW-Bacteroidetes-10	53.3558	3.04285	-50.3129	0.942971
Acidovorax sp. 65-7	56.3564	6.24165	-50.1148	0.889247
Prevotella lascolaii	51.637	1.62549	-50.0115	0.968521
Dialister sp. Marseille-P5638	53.3206	3.49847	-49.8221	0.934388
Eubacterium sp. 41_20	51.0723	1.34472	-49.7276	0.97367
Collinsella sp. OM08-14AT	51.5368	1.89099	-49.6458	0.963308
Simplicispira_unclassified	123.058	73.4657	-49.5926	0.403001
Bacteroides sp. AM16-13	53.0278	3.51854	-49.5092	0.933647
Pseudomonas syringae pv. coryli	57.9749	8.6353	-49.3396	0.851051
Pseudomonas alcaliphila	53.5638	4.27583	-49.288	0.920173
Bacteroides ihuae	54.3254	5.05467	-49.2707	0.906956
Aeromonas piscicola	51.3637	2.15275	-49.2109	0.958088
Methylotenera sp. 17-45-7	50.4384	1.26685	-49.1715	0.974883
Pseudomonas sp. 57B-090624	50.8784	1.87992	-48.9984	0.963051
Comamonas thiooxydans	66.3268	17.391	-48.9358	0.737799
Edwardsiella tarda	53.1683	4.25346	-48.9148	0.92
Pseudomonas sp. GM80	54.4018	5.50345	-48.8984	0.898837
Aerococcus urinae	51.5687	2.69635	-48.8723	0.947713
Burkholderiales bacterium 68-20	62.3894	13.6281	-48.7613	0.781563
Lishizhenia tianjinensis	102.855	54.4239	-48.431	0.470868
Aeromonas eucrenophila	51.4997	3.24894	-48.2507	0.936913
Collinsella sp. 4_8_47FAA	53.8853	5.64875	-48.2365	0.895171
Pseudomonas sp. 2995-3	55.3251	7.16545	-48.1597	0.870485
Duganella_unclassified	66.7671	18.6106	-48.1565	0.721261
Oceanimonas marisflavi	52.8124	4.66043	-48.152	0.911755
Sphingobacterium multivorum	58.0636	10.5998	-47.4638	0.817445
Pseudomonas sp. Root401	55.7377	8.36626	-47.3714	0.849899
Pseudomonas sp. NFPP28	52.701	5.5404	-47.1606	0.894871
Vibrio mimicus	49.9355	2.79666	-47.1388	0.943995
Flavobacterium cutihirudinis	48.309	1.47745	-46.8316	0.969417
Pseudomonas sp. 35 E 8	56.6305	10.0928	-46.5377	0.821778
Methylotenera_unclassified	68.5063	22.0146	-46.4916	0.678648
Pseudomonas caricapapayae	52.3429	5.90773	-46.4352	0.887134
Pseudomonas syringae group genomosp. 7	52.7103	6.29933	-46.411	0.880492
Pseudomonas sp. 58 R 12	56.5109	10.1392	-46.3717	0.820579
Flavobacterium sp. 9	48.8955	2.52522	-46.3702	0.948355
Chryseobacterium bovis	54.5474	8.21017	-46.3372	0.849486
Burkholderiales bacterium RIFCSPHIGHO2_01_FULL_63_240	72.2173	26.1911	-46.0263	0.63733
Oxalobacteraceae_unclassified	51.6522	5.90417	-45.748	0.885694
Aeromonas sp. ASNIH7	49.7054	4.07961	-45.6257	0.917924
Pseudomonas sp. 37 R 15	51.2318	5.66023	-45.5715	0.889517
Pseudomonas parafulva	51.8545	6.36227	-45.4922	0.877305
Pseudomonas sp. 24 E 1	54.2462	8.86657	-45.3796	0.83655
Firmicutes_unclassified	48.4685	3.11074	-45.3578	0.935819
Pseudomonas sp. Leaf48	51.8601	6.5116	-45.3485	0.874439
Pseudomonas sp. GM74	51.9301	6.98	-44.9501	0.865589
Pseudomonas sp. BRG-100	47.8499	2.99199	-44.8579	0.937471
Firmicutes bacterium CAG:83	47.29	2.479	-44.811	0.947579
Pseudomonas wadenswilerensis	49.7752	5.04053	-44.7347	0.898734
Bacteroides coprocola CAG:162	47.1531	2.45053	-44.7026	0.94803
Flavobacterium chilense	46.7041	2.08176	-44.6223	0.955427
Flavobacteriaceae_unclassified	53.1411	9.00673	-44.1344	0.830513
Pseudomonas bohemica	52.984	8.88197	-44.1021	0.832365
Pseudomonas sp. GLE121	44.9933	1.00745	-43.9858	0.977609
Pseudomonas sp. SST3	48.085	4.19921	-43.8857	0.912671
Pseudomonas sp. Root562	47.8019	3.9786	-43.8233	0.916769
Pseudomonas sp. 24 R 17	49.4371	5.73114	-43.706	0.884072
Blattabacterium sp. (Nauphoeta cinerea)	48.2112	4.54575	-43.6655	0.905712
Flavobacterium hydatis	46.9378	3.31523	-43.6226	0.92937
Flavobacterium xueshanense	47.3677	3.75113	-43.6166	0.920808
Flavobacterium swingsii	50.9817	7.4487	-43.533	0.853895
Rhodobiaceae bacterium	46.7375	3.62096	-43.1165	0.922525
Acidovorax valerianellae	60.9141	17.882	-43.0321	0.706439
Ruminococcus sp. AM31-32	45.9707	3.00061	-42.9701	0.934728
Pseudomonadales bacterium RIFCSPLOWO2_02_FULL_63_210	56.2162	13.2707	-42.9455	0.763934
Bifidobacterium pseudocatenulatum	45.6442	2.90969	-42.7345	0.936253
Pseudomonas sp. 58 R 3	49.0346	6.32927	-42.7053	0.870922
Vibrio_unclassified	48.2356	5.79301	-42.4426	0.879902
Pseudomonas sp. PDC86	54.0218	11.6183	-42.4035	0.784934
Parabacteroides johnsonii	45.9724	3.59261	-42.3798	0.921853
Parabacteroides sp. AM25-14	45.2676	2.92396	-42.3436	0.935407
Bacteroides sp. 3_1_40A	47.1896	4.85163	-42.338	0.897189
Flavobacterium araucananum	44.5313	2.30603	-42.2253	0.948216
Pseudomonas phage SL2	42.1739	0.0155897	-42.1584	0.99963
Acidovorax sp. 35-64-16	54.6416	12.6477	-41.9939	0.768533
Aeromonas sp. A35_P	44.1732	2.18203	-41.9912	0.950603
Bacteroidales bacterium	47.3035	5.35721	-41.9463	0.886748
Flavobacterium sp. MEBiC07310	51.7021	9.82269	-41.8794	0.810014
Deltaproteobacteria bacterium HGW-Deltaproteobacteria-24	42.0033	0.431143	-41.5722	0.989735
Flavobacterium plurextorum	42.5035	0.937058	-41.5664	0.977953
Bacteroidetes bacterium GWF2_40_14	48.4354	6.98703	-41.4484	0.855746
Pseudomonas sp. P1.31	50.7862	9.35904	-41.4272	0.815717
Flavobacterium sp. AJ004	47.1072	5.70601	-41.4012	0.878872
Odoribacter splanchnicus	48.4311	7.03445	-41.3966	0.854753
Candidatus Saccharibacteria bacterium 32-49-12	91.3316	49.9793	-41.3524	0.452772
Flavobacterium urumqiense	43.0379	1.71446	-41.3234	0.960164
Acidovorax sp. JS42	57.2748	16.2142	-41.0606	0.716904
Aliivibrio wodanis	45.02	3.96701	-41.053	0.911883
Coprobacter sp.	44.7997	3.84159	-40.9581	0.91425
Pseudomonas sp. M30-35	45.038	4.11752	-40.9205	0.908577
Pseudomonas sp. WCS374	43.969	3.06326	-40.9058	0.930331
uncultured Dysgonomonas sp.	46.8012	6.06068	-40.7405	0.870502
Pseudomonas sp. Irchel s3a18	47.6861	6.95659	-40.7295	0.854117
Laribacter hongkongensis	425.753	385.033	-40.72	0.0956424
Pseudomonas sp. GM41(2012)	45.494	4.91571	-40.5783	0.891948
Bacteroides sp. AM56-10ce	43.9106	3.47077	-40.4399	0.920958
Flavobacterium indicum	92.2331	51.8615	-40.3716	0.437713
Parabacteroides sp. Marseille-P4001	45.9691	5.66718	-40.3019	0.876718
Eubacterium rectale CAG:36	41.0461	1.03243	-40.0137	0.974847
Collinsella sp. TM09-10AT	41.1846	1.28661	-39.898	0.96876
Duganella sp. BJB475	40.9001	1.02114	-39.879	0.975033
Ruminococcus sp. AF37-3AC	42.5921	2.71388	-39.8782	0.936282
Candidatus Saccharibacteria oral taxon TM7x	61.8253	22.23	-39.5952	0.640438
Klebsiella sp. MS 92-3	41.5898	2.3446	-39.2453	0.943626
Zobellella maritima	42.456	3.43994	-39.0161	0.918977
Dickeya phage phiDP23.1	39.8321	0.84797	-38.9841	0.978711
Phascolarctobacterium faecium	41.5524	2.62253	-38.9299	0.936886
Blautia_unclassified	41.7891	2.96279	-38.8263	0.929101
Pseudomonas sp. MWU13-2625	46.9707	8.21692	-38.7538	0.825063
Petrimonas sp. IBARAKI	43.5751	5.14841	-38.4267	0.88185
Tannerella forsythia	42.3684	3.98817	-38.3803	0.905869
uncultured crAssphage	40.763	2.60327	-38.1597	0.936136
Zobellella taiwanensis	41.0021	2.87407	-38.1281	0.929904
Flavobacterium sp. 316	65.2504	27.3491	-37.9013	0.58086
Melaminivora sp. SC2-9	52.9162	15.1977	-37.7185	0.712797
Pseudomonas sp. B28(2017)	41.7292	4.02397	-37.7053	0.90357
Ruminococcus sp. AF16-40	40.2472	2.65033	-37.5969	0.934149
Pseudomonas sp. 34-62-33	42.9662	5.6434	-37.3228	0.868655
Pseudomonas sp. NBRC 111138	39.9558	2.74965	-37.2062	0.931183
Flavobacterium cyanobacteriorum	83.389	46.4356	-36.9534	0.443145
Pseudomonas sp. RIT288	43.2438	6.3335	-36.9103	0.85354
Shewanella sp. HN-41	37.9254	1.02103	-36.9043	0.973078
Flavobacterium sp. Fl	38.7925	1.8943	-36.8982	0.951168
Paucimonas lemoignei	42.7004	5.81806	-36.8823	0.863747
Pseudomonas saponiphila	48.4853	11.7089	-36.7765	0.758507
Pseudomonas sp. TTU2014-080ASC	39.3913	2.77535	-36.616	0.929544
Nitrosomonas mobilis	49.5906	13.1509	-36.4397	0.73481
Azotobacter beijerinckii	81.3751	45.0328	-36.3423	0.446602
Ruminococcus sp. AM28-29LB	38.5505	2.2102	-36.3403	0.942667
Megasphaera_unclassified	40.4138	4.07579	-36.338	0.899148
Prevotella sp. CAG:279	37.5606	1.32473	-36.2358	0.964731
Sphingobacterium faecium	38.918	2.77449	-36.1435	0.928709
Pseudomonas sp. M47T1	39.3872	3.55758	-35.8296	0.909677
Acidovorax sp. OV235	58.5127	22.7894	-35.7233	0.610523
Barnesiella intestinihominis	38.9361	3.25878	-35.6773	0.916304
Bacteroides sp. OM08-17BH	41.0065	5.35115	-35.6554	0.869505
Melaminivora alkalimesophila	54.0402	18.4466	-35.5936	0.65865
Bacteroides fluxus	39.8157	4.29019	-35.5255	0.892249
Pseudomonas sp. HMWF011	39.1072	3.61536	-35.4919	0.907553
Gammaproteobacteria bacterium DM2	39.6996	4.36395	-35.3356	0.890076
Dialister succinatiphilus	36.7013	1.37165	-35.3297	0.962627
Acidovorax sp. Leaf78	50.9235	16.0108	-34.9128	0.685592
Flavobacterium omnivorum	39.2785	4.457	-34.8215	0.886528
Flavobacterium fontis	43.7542	8.97706	-34.7771	0.79483
Pseudomonas granadensis	39.4859	4.88985	-34.596	0.876162
Pseudomonas sp. AP3_16	39.9779	5.39353	-34.5844	0.865087
Pseudomonas sp. GV085	37.642	3.07162	-34.5704	0.918399
Flavobacterium granuli	36.8445	2.29166	-34.5528	0.937802
Cytophaga xylanolytica	40.4025	5.99222	-34.4102	0.851687
Flavobacterium xanthum	36.7122	2.43672	-34.2755	0.933626
Pseudomonas sp. Chol1	38.5272	4.39859	-34.1287	0.885832
Bacteroides cellulosilyticus	37.3666	3.23972	-34.1269	0.913299
Pseudomonas sp. KK4	37.3142	3.4104	-33.9038	0.908603
Collinsella sp. CAG:166	34.9224	1.08836	-33.834	0.968835
Parabacteroides sp. Marseille-P3160	38.3626	4.53106	-33.8315	0.881889
Acidovorax sp. Root70	69.7313	35.9146	-33.8166	0.484956
Chitinophaga sp. K20C18050901	40.1296	6.33909	-33.7905	0.842035
Pseudomonas sp. 655	37.476	3.69092	-33.7851	0.901512
Comamonas sp. AG1104	35.879	2.12322	-33.7557	0.940823
Ruminococcus sp. AM36-18	35.9333	2.26411	-33.6692	0.936991
Pseudomonas sp. 34 E 7	39.0948	5.72924	-33.3656	0.853453
Pseudomonas sp. 52 E 6	39.1923	5.84183	-33.3505	0.850944
Mus musculus	77.6871	44.4514	-33.2356	0.427814
Pseudomonas ficuserectae	39.3906	6.29302	-33.0975	0.84024
uncultured Faecalibacterium sp.	35.6978	2.73237	-32.9655	0.923458
Pseudomonas sihuiensis	33.5751	0.673469	-32.9016	0.979941
Diaphorobacter sp. J5-51	54.4098	21.6131	-32.7967	0.602772
Nematostella vectensis	36.2264	3.43046	-32.7959	0.905305
Burkholderiales bacterium RIFCSPHIGHO2_02_FULL_64_19	42.1316	9.39137	-32.7403	0.777095
Bacteroides sp. AM07-18	37.1796	4.44381	-32.7358	0.880477
Nostoc linckia	45.8359	13.1052	-32.7307	0.714084
Acidovorax ebreus	51.0878	18.3939	-32.6939	0.639954
Pseudomonas sp. Irchel s3b6	35.395	2.8099	-32.5851	0.920613
Pseudomonas congelans	39.3234	6.77291	-32.5505	0.827764
Parabacteroides goldsteinii	35.3795	2.88242	-32.4971	0.918529
Burkholderia ubonensis	210.428	177.952	-32.4753	0.15433
Pseudomonas sp. ok602	33.7049	1.31313	-32.3917	0.96104
Photobacterium gaetbulicola	34.7013	2.33963	-32.3617	0.932578
Pseudomonas sp. MF6396	35.7122	3.36691	-32.3453	0.905721
Janthinobacterium sp. HH102	36.5555	4.21943	-32.336	0.884575
Bacteroidetes bacterium HGW-Bacteroidetes-14	33.7229	1.44963	-32.2732	0.957013
Collinsella sp. TF12-2AT	33.5769	1.30521	-32.2716	0.961128
Pseudomonas sp. B1(2018)	36.7837	4.66498	-32.1187	0.873178
Acidovorax sp. JHL-3	41.7962	9.73022	-32.0659	0.767198
Ralstonia phage RP12	33.8716	1.81965	-32.052	0.946278
Rheinheimera sp. SA_1	34.333	2.2965	-32.0365	0.933111
Pseudomonas sp. RIT-PI-o	36.7168	4.7466	-31.9702	0.870724
Pseudomonas sp. Irchel s3b5	35.1036	3.148	-31.9556	0.910323
Zobellella sp. 59N8	34.1128	2.27661	-31.8361	0.933262
Parabacteroides sp. D26	34.1418	2.31444	-31.8274	0.932211
Pseudomonas sp. HMWF005	40.8516	9.03883	-31.8128	0.77874
Pseudomonas sp. WP001	35.7913	3.98563	-31.8057	0.888642
Pseudomonas marincola	33.2073	1.43577	-31.7715	0.956763
Pseudomonas sp. NBRC 111129	37.0796	5.36542	-31.7142	0.8553
Stenotrophomonas rhizophila	38.8578	7.25259	-31.6052	0.813355
Pseudomonas zhaodongensis	35.0803	3.48459	-31.5957	0.900668
Pseudomonas sp. WCHP16	38.4461	6.8653	-31.5808	0.821431
Streptococcus suis	35.4331	3.88479	-31.5483	0.890363
Pseudomonas sp. TC-11	33.8326	2.46887	-31.3637	0.927027
Aeromonas popoffii	33.4871	2.14286	-31.3443	0.936009
Klebsiella aerogenes	39.5114	8.33344	-31.178	0.789088
Pseudomonas sp. Root569	35.192	4.03029	-31.1617	0.885477
Flavobacterium sp. 103	33.9095	2.74834	-31.1612	0.918951
Pseudomonas sp. GM17	33.878	2.86053	-31.0174	0.915564
Petrimonas mucosa	35.8809	5.02348	-30.8574	0.859996
Arcobacter sp.	31.675	1.10047	-30.5745	0.965257
Bacteroidales bacterium 43_36	36.7201	6.18277	-30.5373	0.831624
Pseudomonas sp. St29	37.3786	6.84228	-30.5363	0.816947
Collimonas sp. OK607	41.5598	11.0345	-30.5253	0.734491
Flavobacterium sp. Leaf82	30.7041	0.180272	-30.5239	0.994129
Aeromonas sp. CA23	32.8239	2.34725	-30.4767	0.92849
Pseudomonas sp. 5	32.776	2.37161	-30.4044	0.927642
Pseudomonas sp. ACN5	34.2651	3.88118	-30.3839	0.886731
Pseudomonas sp. ok272	31.4052	1.15643	-30.2487	0.963177
Pseudomonas sp. EGD-AK9	32.0767	1.82987	-30.2468	0.942953
Flavobacterium alvei	33.7625	3.537	-30.2255	0.895239
Gulbenkiania indica	34.5938	4.40588	-30.1879	0.872639
Blautia sp. Marseille-P2398	31.9664	1.80661	-30.1598	0.943484
Dorea longicatena	31.4453	1.2976	-30.1477	0.958735
Corallincola sp. C4	32.4031	2.26827	-30.1349	0.929998
Pseudomonas sp. LAMO17WK12:I1	33.0776	2.9709	-30.1067	0.910184
Pseudomonas sp. GM33	32.8149	2.75023	-30.0647	0.91619
Pseudomonas sp. ABAC21	37.4754	7.41227	-30.0632	0.80221
Pseudomonas thivervalensis	36.6613	6.65788	-30.0034	0.818395
Flavobacterium sp. HTF	31.2406	1.26373	-29.9769	0.959549
Flavobacterium defluvii	30.6626	0.751816	-29.9108	0.975481
Flavobacterium frigoris	34.5982	4.71315	-29.8851	0.863775
Arcobacter sp. RW43-9	30.3301	0.458997	-29.8711	0.984867
Flavobacterium noncentrifugens	32.9586	3.1155	-29.8431	0.905472
Pseudomonas flavescens	34.809	5.07277	-29.7362	0.854268
Citrobacter amalonaticus	32.4659	2.73538	-29.7305	0.915746
Chryseobacterium sp. AG844	32.2538	2.52541	-29.7284	0.921702
Eubacterium sp. OM08-24	30.1724	0.497226	-29.6751	0.98352
Clostridiales bacterium 42_27	32.317	2.64427	-29.6727	0.918177
Pseudomonas sp. GM102	34.4963	4.83255	-29.6638	0.859911
Flavobacterium marinum	35.5967	6.00683	-29.5898	0.831253
Flavobacterium sp. 1	34.8276	5.26356	-29.5641	0.848868
Pseudomonas balearica	59.1539	29.7937	-29.3602	0.496336
Pseudomonas punonensis	31.9131	2.6215	-29.2916	0.917855
[Flexibacter] sp. ATCC 35103	31.9322	2.68876	-29.2434	0.915798
Acidovorax sp. JHL-9	43.9267	14.7396	-29.187	0.664449
Pseudomonas sp. W15Feb9B	33.9468	4.77918	-29.1676	0.859216
Dysgonomonas sp. 37-18	34.0378	4.88588	-29.152	0.856457
Alicycliphilus_unclassified	42.9814	13.845	-29.1363	0.677883
Bacteroides sp. 2_1_33B	31.3418	2.22737	-29.1144	0.928933
Pseudomonas sp. Irchel s3a10	33.2448	4.22237	-29.0224	0.872991
Flavobacterium sp. KMS	29.6123	0.736736	-28.8755	0.975121
Acidaminococcus intestini	31.3862	2.52489	-28.8614	0.919554
Betaproteobacteria_unclassified	53.6072	24.8756	-28.7316	0.535966
Pseudomonas sp. MRSN12121	30.4127	1.6918	-28.7209	0.944372
Chryseobacterium sp. Leaf394	30.6871	1.97972	-28.7074	0.935487
Flavobacteriales bacterium 32-34-25	32.0394	3.34882	-28.6906	0.895478
Pseudomonas sp. ok266	34.7578	6.08942	-28.6684	0.824804
Shewanella sp. CG12_big_fil_rev_8_21_14_0_65_47_15	30.6823	2.0871	-28.5952	0.931977
Bacteroides oleiciplenus	31.2611	2.69695	-28.5642	0.913728
Pseudomonas sp. NFACC11-2	34.6083	6.12049	-28.4878	0.823149
Chryseobacterium chaponense	31.7898	3.32774	-28.462	0.89532
Pseudomonas sp. PGPPP4	33.7881	5.33459	-28.4535	0.842116
Chryseobacterium sp. CF356	28.8944	0.493673	-28.4007	0.982915
Flavobacterium sp. WG21	29.0964	0.761227	-28.3352	0.973838
Parabacteroides sp. SN4	32.4653	4.32534	-28.14	0.86677
Elusimicrobium sp. An273	29.0423	0.952165	-28.0901	0.967214
Collinsella sp. OM07-12	29.0119	0.940677	-28.0712	0.967576
Alteromonas sp. 190	29.9738	2.02486	-27.9489	0.932446
Flavobacterium aquicola	32.6119	4.66351	-27.9484	0.856999
Bacteroides clarus	30.2281	2.30024	-27.9278	0.923904
Pseudomonas sp. Choline-02u-1	33.222	5.31276	-27.9092	0.840083
Dysgonomonas sp. Marseille-P4361	30.6468	2.90595	-27.7409	0.90518
Aeromonas sp. 159	28.7225	0.990665	-27.7318	0.965509
Acidithiobacillus caldus	126.49	98.958	-27.5324	0.217664
Neisseria meningitidis	39.1096	11.5785	-27.531	0.703947
Candidatus Accumulibacter sp. SK-02	67.6013	40.2314	-27.3699	0.404872
Pseudomonas sp. SDI	33.1316	5.76232	-27.3692	0.826078
Flavobacterium sp. 5	29.7262	2.36761	-27.3586	0.920353
Pseudomonas sp. GW456-E7	30.6627	3.30435	-27.3583	0.892235
Pseudomonas kribbensis	32.0951	4.80444	-27.2907	0.850306
Burkholderiales bacterium 64-34	32.2514	5.01752	-27.2339	0.844425
Acidovorax sp. Leaf160	46.3698	19.2102	-27.1596	0.585717
Dorea formicigenerans	27.8926	0.763102	-27.1295	0.972641
Microvirgula_unclassified	52.3007	25.2131	-27.0876	0.517921
Elizabethkingia_unclassified	45.5362	18.4774	-27.0588	0.594227
Aeromonas bivalvium	28.3555	1.30727	-27.0482	0.953897
Acidovorax radicis	35.1123	8.08829	-27.024	0.769645
Flavobacterium fluvii	35.1236	8.14028	-26.9833	0.768239
Pseudomonas sp. 45MFCol3.1	30.1008	3.21923	-26.8816	0.893052
Pseudomonas sp. Irchel s3f10	33.5491	6.70976	-26.8393	0.800001
Burkholderiales bacterium GWA2_64_37	37.2243	10.5061	-26.7182	0.717763
uncultured bacterium A1Q1_fos_150	30.2501	3.66088	-26.5892	0.878979
Bacteroidetes bacterium HGW-Bacteroidetes-23	32.3994	5.8434	-26.556	0.819645
Burkholderiales bacterium RIFCSPHIGHO2_01_FULL_64_960	51.0467	24.5147	-26.5321	0.519761
Clostridioides difficile	31.3458	4.84566	-26.5002	0.845413
Pseudomonas floridensis	30.4708	4.04602	-26.4248	0.867216
Flavobacterium micromati	32.0047	5.76875	-26.2359	0.819753
Pseudomonas sp. 43mfcvi1.1	30.8225	4.63322	-26.1893	0.849681
Pseudomonas sp. LFM046	30.7008	4.54698	-26.1538	0.851894
Chryseobacterium jeonii	27.523	1.41479	-26.1082	0.948596
Acinetobacter celticus	26.5781	0.514228	-26.0639	0.980652
Collimonas pratensis	33.9313	7.87835	-26.0529	0.767815
Fluviicola sp.	260.102	234.049	-26.0528	0.100164
Vibrio diazotrophicus	29.7383	3.71558	-26.0227	0.875057
Marinobacter sp. T13-3	29.1245	3.12127	-26.0032	0.89283
Pseudomonas tremae	32.0455	6.18661	-25.8589	0.806943
Massilibacillus massiliensis	31.6744	5.81766	-25.8567	0.816329
Pseudomonas sp. URMO17WK12:I11	28.622	2.7737	-25.8483	0.903092
Photobacterium proteolyticum	27.4829	2.09573	-25.3872	0.923744
Oceanimonas doudoroffii	27.4075	2.0511	-25.3564	0.925163
Pseudomonas sp. NBRC 111131	26.2095	0.885742	-25.3237	0.966205
Lachnospiraceae_unclassified	26.2617	1.04745	-25.2142	0.960115
Pseudomonas sp. OV221	34.4226	9.22402	-25.1986	0.732036
Paenibacillus sp. VT-16-81	33.9148	8.81188	-25.1029	0.740176
Bacteroides vulgatus CAG:6	27.7519	2.68346	-25.0684	0.903305
Pseudomonas sp. 43NM1	28.6925	3.63327	-25.0593	0.873372
Pseudomonas jinjuensis	27.4874	2.49926	-24.9882	0.909076
Prevotella multisaccharivorax	28.1021	3.12124	-24.9809	0.888932
Megamonas_unclassified	26.0193	1.06061	-24.9587	0.959237
Shewanella morhuae	26.5241	1.57409	-24.95	0.940654
Cruoricaptor ignavus	32.8997	7.95386	-24.9458	0.758239
Ruminococcus sp. TM10-9AT	26.1291	1.26201	-24.8671	0.951701
Flavobacteriaceae bacterium CRH	25.2543	0.395188	-24.8591	0.984352
Chryseobacterium sp. SCN 40-13	33.102	8.30722	-24.7948	0.749042
Flavobacterium terrae	35.002	10.2943	-24.7077	0.705895
Chryseobacterium sp. VAUSW3	28.3834	3.70659	-24.6768	0.86941
Pseudomonas fulva	26.5311	1.91767	-24.6135	0.92772
Bacteroides sp. HPS0048	27.6307	3.07843	-24.5523	0.888587
Alistipes shahii	26.5158	2.00779	-24.508	0.924279
Pseudomonas caspiana	27.3791	2.88269	-24.4964	0.894712
Oceanisphaera psychrotolerans	26.2664	1.78152	-24.4849	0.932175
Bacteroides neonati	27.0877	2.62153	-24.4662	0.903221
uncultured Blautia sp.	25.7742	1.33505	-24.4392	0.948202
Pseudomonas thermotolerans	28.0783	3.73874	-24.3396	0.866846
Aeromonas sp. HMWF014	26.3901	2.0772	-24.3129	0.921289
Pseudomonas sp. FW104-R4	25.7774	1.51226	-24.2652	0.941334
Pseudomonas sp. ICMP 561	28.6946	4.44023	-24.2543	0.845259
Megamonas funiformis	25.43	1.23517	-24.1948	0.951429
Pseudomonas sp. MYb193	25.0814	0.988355	-24.093	0.960594
Chryseobacterium piscicola	26.4347	2.36856	-24.0662	0.9104
Dysgonomonas macrotermitis	27.1355	3.06971	-24.0657	0.886874
Bacteroides salyersiae	26.7546	2.73787	-24.0167	0.897667
Neisseriales_unclassified	30.1684	6.21139	-23.957	0.794109
Alistipes sp. ZOR0009	29.7946	5.8923	-23.9023	0.802236
Bacteroides sp. An269	26.683	2.7923	-23.8907	0.895353
Bacillus cereus	52.5602	28.6848	-23.8754	0.454249
Burkholderiales bacterium RIFCSPHIGHO2_12_63_9	32.7164	8.8587	-23.8577	0.729228
Pararhodospirillum photometricum	38.8919	15.0839	-23.808	0.612157
Elizabethkingia miricola	29.8845	6.23982	-23.6446	0.791202
Ruminococcus sp. AF17-11	25.088	1.48299	-23.605	0.940888
Oceanimonas smirnovii	25.5951	1.99807	-23.597	0.921935
Barnesiella sp. An55	25.4666	1.88139	-23.5852	0.926123
Klebsiella oxytoca	29.0655	5.53875	-23.5268	0.809439
Sulfurospirillum arsenophilum	25.7096	2.346	-23.3636	0.90875
Pseudomonas sp. NBRC 111137	25.7212	2.48252	-23.2387	0.903483
Pseudomonas sp. HMWF007	28.5849	5.38553	-23.1994	0.811596
Alistipes finegoldii	25.5167	2.37725	-23.1395	0.906836
Oryzisolibacter propanilivorax	38.7501	15.6136	-23.1365	0.597068
Pseudomonas japonica	24.4576	1.41306	-23.0446	0.942224
Pseudomonas aestusnigri	24.9611	1.94254	-23.0185	0.922177
Ruminococcus sp. AM34-10LB	24.3411	1.39867	-22.9424	0.942539
Pseudomonas phage phiAH14a	24.6604	1.72081	-22.9396	0.93022
Chlorobaculum tepidum	24.5181	1.58507	-22.933	0.935351
Pseudomonas sp. S06B 330	25.2867	2.49658	-22.7902	0.901269
Flavobacterium reichenbachii	23.6975	0.969128	-22.7284	0.959104
[Arcobacter] porcinus	23.1361	0.481639	-22.6544	0.979182
Ruminobacter_unclassified	24.0125	1.36242	-22.65	0.943262
Anabaena sp. WA113	23.0077	0.388984	-22.6187	0.983093
Chryseobacterium sp. 52	23.273	0.65563	-22.6174	0.971829
Flavobacterium sp. IR1	24.2563	1.65176	-22.6045	0.931904
Holdemanella biformis	22.9219	0.361052	-22.5608	0.984249
Pseudomonas sp. ZH-FAD	25.3528	2.88067	-22.4722	0.886377
Collinsella sp. 60_9	23.1726	0.719943	-22.4527	0.968931
Pseudomonas sp. OV657	63.5565	41.1614	-22.3952	0.352366
Parabacteroides sp. merdae-related_45_40	23.703	1.33858	-22.3645	0.943527
Pseudomonas indoloxydans	27.8617	5.54919	-22.3125	0.800831
Chromatiaceae_unclassified	22.3076	0.0695638	-22.238	0.996882
Candidatus Chryseobacterium massiliae	24.8344	2.63566	-22.1988	0.893871
Flavobacterium sp. IMCC34759	25.3589	3.16089	-22.198	0.875354
Pseudomonas sp. MYb187	23.2577	1.06536	-22.1923	0.954193
Aeromonas sp. w55	24.9344	2.74355	-22.1909	0.889969
Daphnia pulex	41.5285	19.3786	-22.1499	0.533366
Pseudomonas sp. SHC52	25.8114	3.67666	-22.1347	0.857557
Flavobacterium sp. A45	24.4818	2.36264	-22.1192	0.903494
Bacteroides nordii	24.4023	2.31535	-22.0869	0.905118
Acidaminococcus sp. BV3L6	23.7986	1.75245	-22.0461	0.926363
Pseudomonas sp. URMO17WK12:I12	24.346	2.32825	-22.0178	0.904368
Pseudomonas sp. OV397	26.9141	4.94105	-21.973	0.816414
Flavobacterium spartansii	23.2895	1.32302	-21.9665	0.943192
Pseudomonas sp. GV091	30.4279	8.63041	-21.7975	0.716365
Flavobacterium sp. LM4	24.0652	2.28374	-21.7815	0.905102
Proteiniphilum saccharofermentans	24.746	3.08805	-21.6579	0.87521
Acidovorax cattleyae	32.5369	10.9091	-21.6278	0.664715
Pseudomonas knackmussii	24.0804	2.45363	-21.6268	0.898107
Bacteroides sp. 3_1_13	23.0739	1.46859	-21.6053	0.936353
Acidovorax sp. Root568	49.1793	27.6408	-21.5385	0.437959
Pseudomonas sp. 09C 129	23.5549	2.04947	-21.5054	0.912992
Pseudomonas argentinensis	23.6878	2.18539	-21.5024	0.907742
Pseudomonas mosselii	26.6341	5.17525	-21.4588	0.805691
Eubacterium sp. TM06-47	21.7655	0.328762	-21.4368	0.984895
Desulfovibrio sp. G11	25.6524	4.23891	-21.4135	0.834756
Arsukibacterium ikkense	23.1547	1.75677	-21.398	0.924129
Pseudomonas composti	25.2773	3.88478	-21.3926	0.846314
Pseudomonas asturiensis	23.9073	2.55503	-21.3522	0.893127
Pseudomonas linyingensis	58.5817	37.2411	-21.3406	0.364288
Candidatus Magnetoovum chiemensis	25.4086	4.10344	-21.3052	0.838502
[Eubacterium] eligens	22.0471	0.746106	-21.301	0.966158
Comamonas sp. JNW	36.2291	14.9888	-21.2404	0.586279
Bacteroides caecimuris	22.5809	1.41785	-21.163	0.93721
Bacteroides sp. CAG:144	23.5727	2.44667	-21.126	0.896207
Bacteroides sp. AR29	23.5757	2.53504	-21.0407	0.892472
Microvirgula sp. AG722	25.3117	4.34412	-20.9676	0.828375
Ruminococcus sp. TF12-19AC	22.5224	1.58124	-20.9412	0.929792
Pedobacter xixiisoli	25.6814	4.82996	-20.8514	0.811928
Bacteroides sp. KFT8	26.1143	5.29564	-20.8186	0.797213
Saccharospirillum impatiens	21.6827	0.897335	-20.7853	0.958615
Vibrio sp. 10N.286.49.B3	22.6998	1.92172	-20.7781	0.915342
Pseudomonas sp. Leaf127	21.7752	1.02451	-20.7507	0.952951
Vibrio anguillarum	23.0873	2.44492	-20.6423	0.894101
Ruminococcus sp. CAG:108-related_41_35	22.0325	1.39698	-20.6355	0.936594
Collinsella sp. TM10-22	21.1756	0.609596	-20.566	0.971212
Acidovorax sp. 59	22.5888	2.04891	-20.5399	0.909295
Curvibacter_unclassified	40.3775	19.9076	-20.4699	0.506963
Flavobacterium sp. GV028	21.533	1.11197	-20.421	0.94836
Pseudomonas sp. 31 E 5	22.4046	2.02632	-20.3783	0.909558
Oceanimonas sp. GK1	21.6688	1.38245	-20.2864	0.936201
Ruminococcus sp. CAG:9-related_41_34	21.462	1.18727	-20.2748	0.94468
Parabacteroides sp. CAG:409	22.1853	1.93679	-20.2485	0.912699
Pseudomonas azotifigens	23.9521	3.718	-20.2341	0.844773
Providencia alcalifaciens	21.3363	1.25918	-20.0772	0.940985
Pseudomonas sp. URIL14HWK12:I6	24.6678	4.60854	-20.0593	0.813176
Pseudomonas toyotomiensis	23.8872	3.83005	-20.0572	0.839661
Duganella sacchari	24.9253	4.87001	-20.0553	0.804616
Roseburia inulinivorans	24.4099	4.36249	-20.0474	0.821282
Pseudomonas sp. MWU12-2534b	21.4542	1.40692	-20.0472	0.934422
Rugamonas rubra	29.5655	9.5277	-20.0378	0.677742
Circular genetic element sp.	21.2712	1.25149	-20.0197	0.941165
Chryseobacterium sp. FF12	22.3496	2.39535	-19.9543	0.892824
Bacteroidaceae_unclassified	20.8434	0.898023	-19.9454	0.956916
Pseudomonas coleopterorum	21.3614	1.42349	-19.9379	0.933362
Sinorhizobium sp. GL28	20.7407	0.840266	-19.9004	0.959487
Bacteroides intestinalis	31.144	11.2515	-19.8925	0.638725
Pseudomonas oleovorans	26.0646	6.18537	-19.8793	0.762691
Rugosibacter aromaticivorans	44.3251	24.6405	-19.6846	0.444096
Oxalobacteraceae bacterium AB_14	24.0431	4.42353	-19.6196	0.816017
Clostridiales bacterium 59_14	22.0446	2.44315	-19.6014	0.889172
Dysgonomonas alginatilytica	22.4956	2.90686	-19.5888	0.870781
Pseudomonas sp. GV041	22.1118	2.53927	-19.5726	0.885162
Bacteroides sp. 43_46	20.6506	1.10627	-19.5444	0.946429
Pseudomonas phage ventosus	22.1781	2.72039	-19.4577	0.877339
Flavobacterium denitrificans	21.6663	2.23677	-19.4295	0.896763
Bacteroides paurosaccharolyticus	22.1244	2.69853	-19.4259	0.878029
uncultured phage	19.6415	0.229988	-19.4115	0.988291
Streptococcus pneumoniae	23.9677	4.57614	-19.3915	0.80907
Pseudomonas sp. XWY-1	23.2911	3.90869	-19.3824	0.832181
Prevotella sp. 10(H)	20.6011	1.32426	-19.2769	0.935719
Flavobacteriaceae bacterium CG2_30_31_66	19.8458	0.607646	-19.2382	0.969382
Bacteroides sp. AF39-10AT	21.4851	2.25635	-19.2287	0.894981
Paludibacter sp.	21.0247	1.82832	-19.1964	0.913039
Pseudomonas guariconensis	20.1448	0.954661	-19.1901	0.95261
Daphnia magna	25.0102	5.84589	-19.1643	0.76626
Flavobacterium sp. Root186	19.6499	0.531821	-19.1181	0.972935
Pseudomonas sp. NFPP04	21.9166	2.80034	-19.1163	0.872228
Vibrio alginolyticus	22.7534	3.71388	-19.0395	0.836777
Flavobacterium tructae	19.5274	0.491048	-19.0364	0.974853
Erwinia phage vB_EamM_RisingSun	19.0422	0.0214498	-19.0208	0.998874
Arcobacter sp. LPB0137	19.3762	0.369029	-19.0072	0.980955
Mariniphaga anaerophila	34.1911	15.1997	-18.9914	0.555449
Burkholderiales bacterium PBB4	52.0896	33.1708	-18.9189	0.363198
Megamonas rupellensis	19.5448	0.648129	-18.8967	0.966839
Brumimicrobium sp. C305	25.6849	6.79748	-18.8874	0.735351
Pseudomonas sp. NFPP12	18.8884	0.0137592	-18.8746	0.999272
Acidovorax sp.	25.1365	6.29224	-18.8443	0.749677
Burkholderia cenocepacia	78.4683	59.6343	-18.834	0.24002
Pseudomonas sp. NFACC13-1	22.5826	3.78831	-18.7943	0.832247
Pseudomonas sp. 25 E 4	20.991	2.21215	-18.7788	0.894615
Chryseobacterium formosense	19.18	0.426748	-18.7533	0.97775
Bacteroides timonensis	20.3223	1.59702	-18.7253	0.921416
Dysgonomonas sp. Marseille-P4356	23.2266	4.53603	-18.6906	0.804705
gamma proteobacterium L18	22.3395	3.67448	-18.6651	0.835517
Pectobacterium carotovorum	28.7086	10.0448	-18.6638	0.650111
Collinsella sp. TM05-38	19.4075	0.778014	-18.6295	0.959912
Pseudomonas sp. M1	20.6588	2.03637	-18.6224	0.901428
Aliiarcobacter trophiarum	18.8621	0.272558	-18.5895	0.98555
Aeromonas sp. HMWF036	19.3741	0.808104	-18.566	0.958289
Pseudomonas cichorii	20.3887	1.82923	-18.5594	0.910282
Collinsella sp. TF09-1AT	19.1465	0.630755	-18.5157	0.967056
Bacteroides ilei	20.0223	1.51294	-18.5094	0.924437
Shimwellia blattae	19.3994	0.96239	-18.4371	0.950391
Sutterella wadsworthensis CAG:135	31.5506	13.1302	-18.4204	0.583836
Flavobacterium sp. RB1R5	25.6243	7.2503	-18.374	0.717054
Flavobacterium commune	19.6662	1.30811	-18.3581	0.933484
Pseudomonas cannabina	21.608	3.27258	-18.3354	0.848548
Flavobacterium suncheonense	31.7458	13.4492	-18.2966	0.576347
Pseudomonas sp. 1-7	19.2671	0.991397	-18.2757	0.948545
Pseudomonas sp. Pf153	20.7119	2.48297	-18.2289	0.880118
Culturomica massiliensis	21.5374	3.41176	-18.1256	0.841589
Poseidonibacter lekithochrous	18.6895	0.577758	-18.1117	0.969086
Pseudogulbenkiania sp. MAI-1	26.1923	8.08738	-18.105	0.691231
Comamonas granuli	80.1028	62.0376	-18.0652	0.225525
Flavobacterium sp. CF136	20.3935	2.3759	-18.0176	0.883497
Flavobacterium tegetincola	25.0823	7.07278	-18.0096	0.718017
Flavobacterium branchiophilum	49.3461	31.3697	-17.9764	0.364292
Chryseobacterium sp.	19.7175	1.79706	-17.9204	0.90886
Massilibacteroides vaginae	19.7878	1.90935	-17.8784	0.903509
Variovorax sp. GV040	22.4952	4.61951	-17.8757	0.794644
Pseudomonas sp. Z003-0.4C(8344-21)	21.4926	3.66275	-17.8299	0.829581
Dysgonomonas gadei	20.3726	2.57198	-17.8006	0.873753
Bacteroides mediterraneensis	18.8463	1.05027	-17.7961	0.944272
Chryseobacterium aquaticum	19.8723	2.1006	-17.7717	0.894295
Sulfurospirillum deleyianum	19.3201	1.58381	-17.7363	0.918023
Pseudomonas sp. Irchel 3E19	21.7584	4.02693	-17.7315	0.814925
Paludibacterium yongneupense	26.1157	8.39119	-17.7245	0.678692
Pseudomonas sp. BS-2016	18.3784	0.654627	-17.7238	0.964381
Flavobacterium sp. AJR	20.2347	2.53375	-17.7009	0.874782
Paludibacter sp. SCN 51-9	18.8953	1.20445	-17.6908	0.936256
Pseudomonas sp. URMO17WK12:I6	19.7072	2.03072	-17.6765	0.896955
Porphyromonas sp. 31_2	18.5779	0.906854	-17.671	0.951186
Flavobacterium sp. BFFFF1	22.4381	4.78381	-17.6543	0.7868
Flavobacterium fryxellicola	19.836	2.20164	-17.6343	0.889008
Bacteroides sartorii	19.6513	2.02729	-17.624	0.896837
Pseudomonas sp. YY-1	20.3713	2.81017	-17.5611	0.862053
Flavobacterium sp. TAB 87	20.478	3.00056	-17.4775	0.853474
Bacteroides sp. 2_2_4	18.9256	1.47374	-17.4518	0.92213
Pseudomonas sp. Leaf129	18.8109	1.38306	-17.4279	0.926476
Pseudomonas sp. A46	18.6068	1.18961	-17.4172	0.936066
Aquitalea magnusonii	48.9458	31.54	-17.4058	0.355613
Pseudomonas kunmingensis	19.3089	1.9401	-17.3688	0.899523
Rheinheimera baltica	19.3341	1.98167	-17.3525	0.897504
Massilia namucuonensis	27.153	9.82215	-17.3308	0.638266
Pseudomonas sp. PA15(2017)	21.5334	4.22656	-17.3068	0.803721
Subdoligranulum variabile	19.1742	1.96143	-17.2127	0.897704
Photorhabdus luminescens	18.7582	1.55194	-17.2062	0.917266
Candidatus Symbiothrix dinenymphae	19.3016	2.16695	-17.1347	0.887732
Pseudomonas sp. R81	20.2522	3.1657	-17.0865	0.843686
Janthinobacterium sp. BJB412	26.816	9.74494	-17.071	0.6366
Pseudomonas sp. Irchel 3A5	20.8151	3.74991	-17.0651	0.819846
Duganella sp. CF517	22.6657	5.61413	-17.0516	0.752307
Flavobacterium sp. URHB0058	17.7958	0.787466	-17.0084	0.95575
Bacteroides sp. NMBE5	18.8958	1.94045	-16.9554	0.897308
Acidovorax sp. Root267	18.9088	1.95611	-16.9527	0.89655
Melaminivora sp. SC2-7	26.8238	9.87983	-16.944	0.631677
Tannerella sp. 6_1_58FAA_CT1	18.6585	1.71589	-16.9426	0.908037
Aliiarcobacter thereius	17.2787	0.336374	-16.9423	0.980532
Clostridiales bacterium 52_15	19.449	2.54019	-16.9089	0.869393
Pseudomonas sp. 24 E 13	18.8309	1.94904	-16.8819	0.896498
Fusicatenibacter saccharivorans	17.8659	0.988568	-16.8773	0.944667
Methylophilales bacterium 16-45-9	23.7688	6.91035	-16.8584	0.709268
Acinetobacter towneri	18.8257	2.01354	-16.8121	0.893043
Riemerella anatipestifer	26.5488	9.77151	-16.7773	0.631942
Pseudomonas sp. FW507-12TSA	18.7172	1.94307	-16.7741	0.896188
Delftia lacustris	36.2323	19.4991	-16.7333	0.461832
Porphyromonadaceae_unclassified	19.2677	2.53525	-16.7324	0.86842
Pseudomonas sp. Bc-h	17.7764	1.06743	-16.709	0.939952
Marinilabilia salmonicolor	24.6409	7.9334	-16.7076	0.67804
Flavobacterium sp. IMCC34762	18.1548	1.50842	-16.6464	0.916914
Flavobacteriales bacterium 32-35-8	21.0848	4.4588	-16.626	0.78853
Pseudomonas sp. P97.38	18.7582	2.15204	-16.6061	0.885275
Chryseobacterium sp. Leaf405	17.0708	0.46777	-16.603	0.972598
Klebsiella michiganensis	17.5001	0.919054	-16.5811	0.947483
Bacteroidetes bacterium GWF2_49_14	21.0669	4.50431	-16.5626	0.78619
Chromobacterium sp. IIBBL 112-1	70.5012	53.9566	-16.5446	0.234671
Oscillibacter sp. ER4	20.5741	4.08059	-16.4935	0.801664
Staphylococcus phage IME1354_01	16.6625	0.189234	-16.4733	0.988643
Parabacteroides sp. D13	17.4032	0.999435	-16.4038	0.942572
Barnesiella viscericola	17.7922	1.41129	-16.3809	0.920679
Collimonas arenae	40.6447	24.2671	-16.3776	0.402946
Dickeya zeae	18.725	2.40669	-16.3183	0.871472
Pseudomonas sp. CMR5c	17.3494	1.03128	-16.3182	0.940558
Streptococcus varani	17.9227	1.60887	-16.3138	0.910233
Pseudomonas sp. 44 R 15	18.5888	2.29339	-16.2954	0.876625
Pseudomonas sp. 1033	18.7265	2.45452	-16.2719	0.868928
Flavobacteriaceae bacterium 3519-10	21.081	4.82331	-16.2577	0.771202
Flavobacterium caeni	20.0266	3.78241	-16.2442	0.811131
Candidatus Snodgrassella sp. T4_34144	17.9459	1.7104	-16.2355	0.904692
Betaproteobacteria bacterium HGW-Betaproteobacteria-13	24.6358	8.41733	-16.2185	0.65833
Flavobacterium sp. Root901	17.4215	1.20384	-16.2176	0.930899
Pseudomonas sp. GW531-R1	17.6919	1.52888	-16.163	0.913583
Chryseobacterium taihuense	18.6519	2.49279	-16.1591	0.866352
Comamonas sp. E6	21.0017	4.8739	-16.1278	0.767928
Colwellia chukchiensis	18.7444	2.62044	-16.124	0.860202
Pseudomonas sp. A214	17.7097	1.58874	-16.1209	0.91029
Chryseobacterium arachidis	16.8043	0.73825	-16.066	0.956068
Flavobacterium sp. 40-81	19.2399	3.20636	-16.0336	0.833349
Bacteroides sp. D2	17.8471	1.85689	-15.9903	0.895956
Flavobacterium pectinovorum	17.0262	1.10186	-15.9243	0.935284
Bacteroidetes bacterium GWE2_42_24	21.9159	6.00026	-15.9156	0.726214
Enterococcus faecalis	17.9142	2.01062	-15.9036	0.887764
Pseudomonas cuatrocienegasensis	19.6193	3.72064	-15.8987	0.810358
Hydrogenophilales bacterium CG18_big_fil_WC_8_21_14_2_50_58_12	32.7325	16.86	-15.8724	0.484914
Chryseobacterium sp. 39-10	19.3778	3.51224	-15.8656	0.81875
Bacteroides sp. AR20	18.3931	2.59859	-15.7945	0.85872
Pseudoalteromonas phage vB_PspS-H40/1	16.0076	0.253871	-15.7537	0.984141
Bacteroides sp. 43_108	17.7664	2.01275	-15.7537	0.886711
Pseudomonas sp. StFLB209	16.9728	1.23693	-15.7359	0.927123
Vibrio breoganii	17.6183	1.91385	-15.7044	0.891371
Butyricimonas sp. Marseille-P3923	19.1044	3.41536	-15.689	0.821226
Acidovorax sp. Root217	22.3966	6.75722	-15.6394	0.698292
Pseudomonas chloritidismutans	17.3842	1.74909	-15.6351	0.899386
Arcobacter nitrofigilis	15.9189	0.309173	-15.6097	0.980578
Pseudomonas sp. A25(2017)	18.6169	3.05255	-15.5643	0.836033
Sulfurospirillum cavolei	18.3373	2.81842	-15.5189	0.846302
Chryseobacterium tenax	16.7636	1.25141	-15.5121	0.92535
Bacteroides sp. 3_1_23	16.7726	1.27204	-15.5006	0.924159
bacterium F082	16.9645	1.53754	-15.4269	0.909367
Pseudomonas sp. Irchel s3h9	18.996	3.61325	-15.3827	0.809789
Acinetobacter johnsonii	17.8855	2.51528	-15.3702	0.859368
Polaribacter gangjinensis	24.7898	9.46058	-15.3292	0.618368
Polaromonas glacialis	38.6663	23.3644	-15.3019	0.395743
Spirochaetae bacterium HGW-Spirochaetae-5	19.8572	4.56014	-15.2971	0.770354
Rickettsia prowazekii	19.9633	4.67547	-15.2878	0.765797
Vibrio harveyi	16.3195	1.04588	-15.2736	0.935912
Coprobacter fastidiosus	16.9808	1.73515	-15.2457	0.897817
Bacteroides coprosuis	18.1776	2.9431	-15.2345	0.838092
Anaerophaga thermohalophila	19.9784	4.7777	-15.2007	0.760856
Burkholderia mallei	29.7503	14.5627	-15.1876	0.510502
Iodobacter sp. BJB302	18.1565	2.9848	-15.1717	0.835607
Oceanimonas baumannii	16.6431	1.49523	-15.1479	0.910159
Pseudomonas sp. UC 17F4	16.7832	1.64732	-15.1358	0.901847
Pseudomonas phage Lu11	15.2486	0.141188	-15.1074	0.990741
Brumimicrobium salinarum	20.5184	5.44732	-15.0711	0.734515
Pseudomonas sp. B15(2017)	15.9937	0.934164	-15.0595	0.941592
Pseudomonas massiliensis	17.1151	2.08655	-15.0285	0.878087
Ochrobactrum rhizosphaerae	15.9131	0.893975	-15.0191	0.943821
Pseudomonas sp. Irchel 3F6	17.9467	2.93058	-15.0161	0.836706
Parabacteroides bouchesdurhonensis	16.3027	1.28713	-15.0156	0.921048
Flavobacterium sp. HYN0048	20.9646	5.99257	-14.972	0.714157
Flavobacterium crassostreae	21.2566	6.30285	-14.9537	0.703487
Pseudomonas graminis	17.0932	2.21271	-14.8805	0.870551
Duganella sp. HH105	22.2511	7.382	-14.8691	0.668241
Flavobacterium saccharophilum	15.5421	0.677156	-14.8649	0.956431
Flavobacterium sp. JRM	15.487	0.627957	-14.8591	0.959453
Mediterranea massiliensis	15.9521	1.11915	-14.8329	0.929843
Lentimicrobium saccharophilum	25.4063	10.5775	-14.8289	0.583668
Chryseobacterium zeae	15.6338	0.970907	-14.6629	0.937897
Aeromonas sp. HMWF017	15.291	0.660798	-14.6302	0.956785
Butyricimonas virosa	16.61	1.98414	-14.6258	0.880545
Flavobacterium glycines	15.9527	1.34622	-14.6064	0.915612
Phascolarctobacterium sp. CAG:207	16.8443	2.24658	-14.5978	0.866627
Chryseobacterium koreense	17.6627	3.06539	-14.5973	0.826449
Pseudomonas sp. 10B238	15.1584	0.59565	-14.5628	0.960705
Bacteroides bouchesdurhonensis	15.659	1.15024	-14.5087	0.926544
Flavobacterium sp. ov086	14.5304	0.0257513	-14.5046	0.998228
Ixodes scapularis	17.1777	2.6768	-14.5009	0.84417
Escherichia fergusonii	16.688	2.18917	-14.4988	0.868818
Vibrio sp. OULL4	14.5189	0.043776	-14.4751	0.996985
Porphyromonadaceae bacterium KH3R12	16.199	1.73961	-14.4594	0.89261
Parabacteroides gordonii	15.9367	1.52555	-14.4112	0.904275
Comamonadaceae bacterium CD01	48.2178	33.8114	-14.4065	0.298779
Flavobacterium sp. LB2P30	23.9943	9.67474	-14.3196	0.59679
Thermophagus xiamenensis	18.3203	4.00722	-14.3131	0.781269
Chryseobacterium humi	16.6219	2.37059	-14.2513	0.857381
Alteromonadales_unclassified	15.5522	1.32595	-14.2263	0.914742
Pseudomonas sp. Leaf58	16.3956	2.17687	-14.2187	0.867228
Acinetobacter bohemicus	17.062	2.87666	-14.1853	0.831399
Sulfurospirillum_unclassified	16.2997	2.12395	-14.1758	0.869694
Tannerella sp. oral taxon HOT-286	15.3891	1.26338	-14.1258	0.917904
Pseudomonas sp. GTC 16482	15.2838	1.19672	-14.0871	0.9217
Chryseobacterium sp. CBo1	17.508	3.4445	-14.0635	0.803262
Ochrobactrum thiophenivorans	14.1704	0.109605	-14.0608	0.992265
Delftia tsuruhatensis	40.8349	26.8453	-13.9896	0.34259
Pseudomonas sp. RW409	15.8818	1.92492	-13.9569	0.878797
Flavobacterium chungangense	18.1525	4.1978	-13.9547	0.768748
Acidovorax sp. 17-64-282	21.6003	7.6647	-13.9356	0.645158
Holophaga foetida	17.8872	3.96687	-13.9203	0.778228
Pseudomonas sp. NFACC04-2	15.098	1.18938	-13.9086	0.921222
Pseudomonas sp. F51	16.8667	2.9852	-13.8815	0.823012
Pseudomonas sp. NFACC45	16.4002	2.56635	-13.8338	0.843517
Alistipes sp. AF14-19	19.7846	6.04085	-13.7438	0.694669
Geofilum rhodophaeum	16.9057	3.17549	-13.7302	0.812164
Janthinobacterium sp. CG23_2	48.5052	34.8168	-13.6885	0.282206
Pseudomonas reidholzensis	17.4439	3.82252	-13.6213	0.780867
Parabacteroides timonensis	15.1428	1.54497	-13.5978	0.897974
Azotobacter chroococcum	36.0138	22.4549	-13.559	0.376494
Shigella dysenteriae	14.8516	1.32139	-13.5302	0.911027
Shewanella sp. 11B5	13.6284	0.156033	-13.4724	0.988551
Flavobacterium gillisiae	15.5221	2.08413	-13.438	0.865731
Flavobacterium sp. HYN0059	15.914	2.53358	-13.3804	0.840795
Shigella boydii	14.6434	1.29747	-13.346	0.911396
Pseudomonas sp. VLB120	17.098	3.75948	-13.3386	0.780122
Acinetobacter larvae	15.8187	2.49294	-13.3257	0.842405
Pseudomonas sp. URMO17WK12:I2	13.7969	0.488701	-13.3082	0.964579
Pseudomonas sp. ATCC 13867	14.4314	1.13709	-13.2944	0.921208
Flavobacterium seoulense	14.9831	1.73045	-13.2527	0.884507
Bacteroides sp. 1_1_30	14.2545	1.00198	-13.2525	0.929708
Megasphaera elsdenii	16.6966	3.45579	-13.2408	0.793024
Flavobacterium sp. KJJ	13.7251	0.486946	-13.2381	0.964521
Pseudomonas cremoricolorata	21.4208	8.18283	-13.238	0.617996
Ralstonia phage DU_RP_I	18.6104	5.3769	-13.2335	0.711081
Bifidobacterium adolescentis CAG:119	13.5999	0.412653	-13.1873	0.969658
Porphyromonadaceae bacterium KH3CP3RA	15.2456	2.06775	-13.1779	0.864371
Pseudomonas sp. NFR16	14.3154	1.14504	-13.1703	0.920013
Bifidobacterium bifidum	13.6681	0.545301	-13.1228	0.960104
Acidovorax sp. SCN 68-22	21.711	8.6021	-13.1089	0.60379
Pseudomonas sp. C9	33.2786	20.2264	-13.0522	0.392209
Azotobacter vinelandii	26.1725	13.1236	-13.0488	0.498571
Pseudomonas cerasi	14.4587	1.45655	-13.0021	0.899261
Vibrio sp. E4404	14.7887	1.79371	-12.995	0.878711
Sporocytophaga myxococcoides	27.0216	14.0458	-12.9758	0.480201
Comamonas sp. B-9	17.4425	4.49794	-12.9446	0.742128
Zoogloea resiniphila	15.3423	2.41899	-12.9233	0.842333
Chryseobacterium shigense	14.6362	1.72096	-12.9153	0.882418
Prevotella sp. AGR2160	13.0383	0.155617	-12.8827	0.988065
Pseudomonadales bacterium RIFCSPLOWO2_12_60_38	14.4181	1.54777	-12.8704	0.892651
Flavobacterium sp. Root420	13.513	0.655125	-12.8579	0.951519
Prevotella intermedia	13.6599	0.827498	-12.8324	0.939421
Vibrio metoecus	13.6136	0.790995	-12.8226	0.941897
Catenibacterium mitsuokai	13.6627	0.870428	-12.7922	0.936291
Hafnia alvei	14.2488	1.46934	-12.7795	0.89688
Duganella sp. CF402	16.5701	3.79598	-12.7741	0.770913
Klebsiella sp. PO552	13.2998	0.554322	-12.7455	0.958321
Pseudomonas psychrotolerans	19.6285	6.88545	-12.743	0.649211
Chryseobacterium sp. YR460	13.1093	0.36656	-12.7427	0.972038
[Ruminococcus] gnavus	22.387	9.65021	-12.7368	0.568937
Snodgrassella sp. CFCC 13594	14.5906	1.85601	-12.7346	0.872794
Chryseobacterium hungaricum	13.8964	1.21185	-12.6846	0.912794
Coprobacter secundus	14.3042	1.67487	-12.6293	0.882911
Malacobacter marinus	12.8586	0.235135	-12.6235	0.981714
Flavobacterium daejeonense	21.2767	8.68305	-12.5937	0.5919
Nitrincola sp. xg18	14.4262	1.8498	-12.5764	0.871775
Chryseobacterium sp. Hurlbut01	13.5986	1.04743	-12.5512	0.922975
Bilophila_unclassified	13.0164	0.477911	-12.5385	0.963284
Pseudomonas sp. MT-1	14.0123	1.53145	-12.4809	0.890707
Chryseobacterium indologenes	21.0416	8.64028	-12.4014	0.589372
Nitritalea halalkaliphila	13.7189	1.33297	-12.3859	0.902837
Pseudomonas sp. s211(2017)	13.6728	1.30484	-12.3679	0.904567
Plasmopara halstedii	13.7096	1.3649	-12.3447	0.900442
Chryseobacterium treverense	13.5042	1.16565	-12.3385	0.913682
Flavobacterium limnosediminis	17.6898	5.38995	-12.2998	0.695308
Bacteroidetes bacterium GWA2_40_14	17.8178	5.5206	-12.2972	0.690164
Bacteroidetes bacterium HGW-Bacteroidetes-8	14.1771	1.89985	-12.2772	0.865992
Bacteroides sp. An322	13.3068	1.14261	-12.1642	0.914133
Prevotella sp. CAG:891	13.344	1.20175	-12.1422	0.909941
Acidovorax sp. 32-64-7	13.4413	1.30758	-12.1337	0.902719
Soonwooa buanensis	13.482	1.35678	-12.1252	0.899364
Prevotella sp. P2-180	14.5448	2.42148	-12.1234	0.833516
Flavobacterium antarcticum	13.9018	1.78928	-12.1125	0.871292
Massilia sp. GV045	15.2372	3.15802	-12.0792	0.792742
Pseudomonas phage VCM	13.1651	1.09701	-12.0681	0.916673
Draconibacterium orientale	18.3427	6.27755	-12.0651	0.657763
Massilia psychrophila	15.8994	3.83685	-12.0625	0.758679
Sulfurospirillum halorespirans	14.3687	2.31121	-12.0574	0.839149
Pseudomonas sp. MPBD4-3	13.4297	1.39086	-12.0388	0.896434
Bacteroides sp. CAG:98	13.5681	1.52995	-12.0382	0.88724
Pseudomonas sp. B10	15.036	3.00167	-12.0343	0.800367
Mangrovibacterium marinum	19.9534	7.92401	-12.0294	0.602874
Bacteroides sp. D22	13.1957	1.16723	-12.0285	0.911545
Bacteroides sp. Marseille-P3684	12.9719	0.949657	-12.0223	0.926791
Prevotella paludivivens	12.7681	0.759193	-12.0089	0.94054
Firmicutes bacterium AF16-15	12.6564	0.664852	-11.9916	0.947469
Bacteroides heparinolyticus	12.7332	0.752229	-11.981	0.940924
Pseudomonas sp. Irchel 3H7	17.1208	5.17448	-11.9463	0.697766
Megamonas hypermegale	13.1369	1.20117	-11.9358	0.908566
Pseudomonas sp. S9	12.1333	0.226774	-11.9066	0.98131
Halomonas beimenensis	15.5439	3.64117	-11.9028	0.76575
Pseudomonas sp. 11BF10	13.1822	1.34873	-11.8335	0.897686
Moheibacter sediminis	14.3833	2.55651	-11.8268	0.822259
Aeromonas sp. RU34C	12.5511	0.738432	-11.8126	0.941166
Synergistetes bacterium HGW-Synergistetes-1	12.794	0.993281	-11.8007	0.922363
Bacteroides helcogenes	13.4309	1.63306	-11.7979	0.878411
Acetoanaerobium noterae	12.2891	0.491435	-11.7977	0.960011
Blautia sp. AM28-36	12.2454	0.484712	-11.7607	0.960417
Malacobacter mytili	12.4764	0.723002	-11.7534	0.94205
Rheinheimera_unclassified	11.923	0.17272	-11.7503	0.985514
Bacteroidetes bacterium HGW-Bacteroidetes-4	24.5273	12.8085	-11.7188	0.477786
Pseudomonas sp. BICA1-14	14.0961	2.40104	-11.6951	0.829666
[Flavobacterium] sp. 29	14.5025	2.81882	-11.6836	0.805632
Chryseobacterium sp. Leaf404	12.8592	1.20269	-11.6565	0.906472
Alistipes sp. 56_sp_Nov_56_25	12.3532	0.701664	-11.6516	0.9432
Chryseobacterium limigenitum	13.4067	1.77035	-11.6363	0.86795
Pseudomonas sp. T	12.0436	0.432269	-11.6114	0.964108
Flavobacterium sp. MEB061	18.5899	6.98318	-11.6067	0.624357
Polaromonas naphthalenivorans	47.2303	35.647	-11.5833	0.245252
Odoribacter laneus	12.7155	1.17073	-11.5448	0.907929
Verminephrobacter eiseniae	18.6316	7.09281	-11.5388	0.619314
Janthinobacterium sp. HH01	15.4391	3.90054	-11.5385	0.747359
Desulfovibrio sp. MES5	14.3799	2.84545	-11.5344	0.802123
Bilophila sp. 4_1_30	16.5806	5.06819	-11.5124	0.694331
Vibrio sp. HA2012	12.3964	0.893087	-11.5033	0.927956
Shewanella sp. CG_4_10_14_0_8_um_filter_42_13	17.8698	6.38723	-11.4826	0.642568
Oxalobacteraceae bacterium IMCC9480	33.1346	21.6564	-11.4782	0.346411
Pseudomonas bauzanensis	14.2347	2.75769	-11.477	0.80627
Pseudomonas sp. GM84	12.2494	0.781732	-11.4677	0.936182
Algoriella xinjiangensis	14.4203	2.95342	-11.4669	0.79519
Alistipes_unclassified	13.6155	2.16207	-11.4534	0.841205
Prevotella oryzae	12.9409	1.4876	-11.4533	0.885047
Delftia sp. JD2	12.7253	1.27504	-11.4503	0.899803
Pseudomonas sp. NFACC05-1	13.8097	2.37318	-11.4365	0.828151
Chryseobacterium taiwanense	12.0078	0.5754	-11.4324	0.952081
Chryseobacterium palustre	14.0456	2.61659	-11.429	0.813708
Pseudomonas flexibilis	13.6521	2.27151	-11.3806	0.833615
Acidovorax sp. 107	132.097	120.765	-11.3315	0.0857818
Pseudomonas sp. NFACC19-2	11.6722	0.354704	-11.3175	0.969611
Proteobacteria bacterium ST_bin12	16.0314	4.7477	-11.2837	0.70385
Alkalitalea saponilacus	14.1546	2.87609	-11.2785	0.796809
Clostridium sp. CAG:568	11.2506	0.0103195	-11.2403	0.999083
Delftia sp. 60	18.1071	6.88782	-11.2193	0.619606
Pluralibacter gergoviae	12.3776	1.17621	-11.2014	0.904973
Vibrio rotiferianus	12.4589	1.27016	-11.1887	0.898052
Massilia sp. Root418	24.3343	13.1755	-11.1588	0.458564
Pseudomonas hussainii	14.8191	3.7086	-11.1105	0.749742
Prevotella histicola	13.4883	2.37788	-11.1104	0.823708
Prevotella sp. P5-92	11.4742	0.424968	-11.0492	0.962963
Burkholderiales bacterium 12-64-5	79.4128	68.3704	-11.0424	0.139051
Rheinheimera nanhaiensis	11.6537	0.643508	-11.0102	0.944781
Pseudomonas sp. NFACC09-4	14.1237	3.19054	-10.9332	0.7741
Chryseobacterium vrystaatense	11.142	0.222307	-10.9197	0.980048
Iodobacter fluviatilis	13.1751	2.26749	-10.9076	0.827896
Escherichia albertii	12.2858	1.38553	-10.9003	0.887225
Pseudomonas pelagia	21.5988	10.7079	-10.8909	0.504238
Vogesella sp. LIG4	23.6065	12.7166	-10.8899	0.46131
Ralstonia pickettii	183.68	172.799	-10.8803	0.0592352
Brenneria roseae	11.6811	0.841389	-10.8397	0.92797
Dysgonomonas sp. HGC4	11.4978	0.66165	-10.8362	0.942454
Nephila clavipes	13.9359	3.17728	-10.7586	0.772008
Pseudomonas sp. RIT-PI-a	13.309	2.56027	-10.7488	0.807629
Flavobacteriaceae bacterium JJC	12.9043	2.1776	-10.7267	0.83125
Oceanisphaera arctica	27.5834	16.8727	-10.7107	0.388304
Vibrio quintilis	11.8213	1.1591	-10.6622	0.901948
Flavobacterium segetis	14.3232	3.67159	-10.6516	0.743661
Bacteroidetes bacterium HGW-Bacteroidetes-7	17.8628	7.21637	-10.6464	0.59601
Yersinia frederiksenii	15.8882	5.24836	-10.6399	0.66967
Phascolarctobacterium succinatutens	11.2019	0.582278	-10.6196	0.94802
Photobacterium aquimaris	11.7018	1.11209	-10.5897	0.904964
Parabacteroides sp. 426-9	12.6429	2.09573	-10.5472	0.834237
Pseudomonas oceani	13.2138	2.70326	-10.5106	0.795422
alpha proteobacterium Mf 1.05b.01	10.8676	0.385963	-10.4817	0.964485
Flavobacterium sp. HYN0049	12.1062	1.68096	-10.4252	0.861149
Draconibacterium sediminis	19.3273	8.9028	-10.4245	0.539366
Pseudomonas sp. BIOMIG1BAC	13.5742	3.15225	-10.422	0.767777
Superficieibacter electus	11.6956	1.28056	-10.4151	0.89051
Bacteroidales bacterium 55_9	11.176	0.793982	-10.382	0.928956
Acinetobacter sp. SWBY1	11.486	1.11069	-10.3753	0.9033
Bacteroides congonensis	12.7464	2.37327	-10.3732	0.813809
Ralstonia virus RSL2	10.6142	0.254419	-10.3598	0.97603
Massilia niastensis	16.552	6.21903	-10.333	0.624273
Bacteroidetes bacterium GWF2_33_38	13.6412	3.32133	-10.3198	0.756522
Pseudomonas sp. NFACC02	11.9282	1.60943	-10.3188	0.865074
Flavobacterium gilvum	17.7627	7.44576	-10.317	0.580821
Flavobacterium sp. ABG	11.9228	1.60869	-10.3141	0.865074
Empedobacter falsenii	12.9243	2.67281	-10.2515	0.793196
Vibrio splendidus	13.8139	3.56687	-10.2471	0.741792
Cronobacter phage vB_CsaP_Ss1	14.9596	4.75858	-10.201	0.681905
Shigella sp. SF-2015	11.318	1.12626	-10.1917	0.900489
Acidovorax wautersii	41.7424	31.5531	-10.1893	0.244099
Vibrio mangrovi	11.0009	0.813973	-10.187	0.926009
Parabacteroides sp. HGS0025	13.0503	2.89791	-10.1524	0.777943
Photobacterium leiognathi	11.4233	1.35255	-10.0707	0.881596
Pseudomonas avellanae	11.8461	1.80673	-10.0394	0.847484
Pseudomonas sp. NDM	12.0105	1.99394	-10.0166	0.833984
Yersinia enterocolitica	14.5793	4.57147	-10.0078	0.686441
Alishewanella sp. HH-ZS	10.5957	0.593013	-10.0027	0.944033
Edwardsiella piscicida	11.4189	1.45302	-9.96589	0.872753
Lipotes vexillifer	11.1988	1.24633	-9.9525	0.888709
Chryseobacterium carnipullorum	10.3427	0.399314	-9.94334	0.961392
Burkholderiales bacterium RIFCSPLOWO2_12_FULL_64_33	12.8973	2.96926	-9.92804	0.769776
Rahnella_unclassified	10.116	0.187974	-9.92802	0.981418
Flavobacterium faecale	12.3029	2.38166	-9.92119	0.806414
Ruminococcaceae_unclassified	10.5447	0.635878	-9.90887	0.939697
Virgibacillus profundi	14.3012	4.40901	-9.89218	0.691703
Chryseobacterium sp. YR005	9.89289	0.0163873	-9.87651	0.998344
Chryseobacterium sp. CCH4-E10	10.4387	0.567239	-9.87144	0.94566
Prevotella bivia	11.9797	2.10885	-9.87089	0.823966
Ferrimonas kyonanensis	10.1826	0.318626	-9.86399	0.968709
gamma proteobacterium HdN1	17.2106	7.35095	-9.8597	0.572884
Sulfurospirillum sp. JPD-1	11.0571	1.22163	-9.83551	0.889517
Thalassolituus oleivorans	11.4288	1.59744	-9.83141	0.860227
Bacteroidetes bacterium GWE2_32_14	15.6589	5.8297	-9.82923	0.627708
Acinetobacter sp. NFM2	10.0552	0.2331	-9.82212	0.976818
Vibrio phage pVa-21	11.3905	1.57639	-9.81414	0.861605
Geofilum rubicundum	12.2253	2.4152	-9.81014	0.802443
Marinilabilia sp. WTE	11.3609	1.56193	-9.79895	0.862517
Flavobacterium enshiense	21.5489	11.7646	-9.78435	0.454053
Pseudomonas sp. Irchel s3a12	12.7436	2.98956	-9.75408	0.765408
Mediterranea sp. An20	10.5202	0.782157	-9.73803	0.925652
Acidovorax sp. 12322-1	13.01	3.28965	-9.72034	0.747145
Pseudomonas sp. NFPP33	10.7617	1.04509	-9.71666	0.902889
Bacteroides ndongoniae	10.4999	0.791404	-9.70845	0.924627
Pseudomonas rhizosphaerae	11.9941	2.2895	-9.70459	0.809115
Telmatospirillum siberiense	16.7155	7.01199	-9.7035	0.580509
Proteiniphilum acetatigenes	19.9356	10.2468	-9.68878	0.486005
Coprococcus comes	10.6224	0.95793	-9.66449	0.90982
Gaetbulibacter sp. 5U11	9.74427	0.084582	-9.65968	0.99132
Brumimicrobium aurantiacum	14.1422	4.49809	-9.64408	0.681938
Streptomyces cinnamoneus	22.7929	13.1708	-9.62212	0.422154
Gabonia massiliensis	11.2431	1.6589	-9.58418	0.852451
Bacteroides gallinarum	11.8583	2.28373	-9.57458	0.807415
Sulfuricurvum kujiense	10.3049	0.739073	-9.56588	0.92828
Pseudomonas capeferrum	12.1053	2.58442	-9.52088	0.786505
Chryseobacterium sp. YLOS41	10.7782	1.27721	-9.50098	0.8815
Pseudomonas sp. NFACC39-1	10.8364	1.34589	-9.4905	0.875799
Tangfeifania diversioriginum	20.1757	10.686	-9.48971	0.470352
Dialister sp. CAG:357	10.1753	0.699842	-9.47544	0.931221
Succinivibrionaceae bacterium WG-1	10.0922	0.626595	-9.46564	0.937913
Bacteroidetes bacterium GWA2_42_15	44.1149	34.6717	-9.44319	0.214059
Flavonifractor plautii	14.1845	4.74984	-9.43462	0.665138
Colwellia sp. TT2012	10.7361	1.33651	-9.39958	0.875512
Pseudomonas sp. ZM1	15.3205	5.9221	-9.39839	0.613452
Marinilabiliales bacterium	18.7324	9.33885	-9.39352	0.501459
Betaproteobacteria bacterium RBG_16_58_11	14.0239	4.63757	-9.38635	0.66931
Dysgonomonas mossii	11.2113	1.82518	-9.38613	0.837202
Odoribacter sp. CAG:788	10.3978	1.01354	-9.38426	0.902524
Ruminococcus sp. 5_1_39BFAA	9.96865	0.600466	-9.36819	0.939765
Ruminococcaceae bacterium D16	10.9056	1.57142	-9.33415	0.855907
Oceanisphaera profunda	9.82629	0.497918	-9.32837	0.949328
Pseudomonas sp. S1E40	9.64891	0.333382	-9.31553	0.965449
Pseudomonas sp. TAA207	10.5858	1.2817	-9.30412	0.878923
Xanthomonas gardneri	11.7474	2.44667	-9.30069	0.791726
Pseudomonas sp. FW104-15G4B	11.4506	2.15921	-9.29135	0.811432
Bacteroidales bacterium 43_8	9.80998	0.52369	-9.28629	0.946617
Prevotella bryantii	9.476	0.20043	-9.27557	0.978849
Bacteroidetes bacterium GWE2_40_15	10.8651	1.59114	-9.27393	0.853555
Haloarcobacter anaerophilus	9.68934	0.416545	-9.2728	0.95701
Pseudomonas luteola	15.6483	6.38944	-9.25881	0.591683
Acinetobacter pittii	14.103	4.8608	-9.24218	0.655335
Roseburia faecis	10.9586	1.72562	-9.233	0.842533
Alishewanella sp. WH16-1	9.33999	0.114387	-9.2256	0.987753
Parabacteroides sp. AM18-12LB	10.0633	0.866244	-9.19706	0.913921
Raoultella ornithinolytica	10.321	1.16996	-9.151	0.886642
Bacteroides sp. 9_1_42FAA	9.9506	0.816654	-9.13395	0.917929
Prevotella buccae	9.38888	0.261389	-9.12749	0.97216
Pedobacter antarcticus	11.7822	2.67546	-9.10671	0.772923
Bacteroidetes bacterium GWE2_39_28	10.4463	1.34816	-9.09815	0.870944
Roseburia intestinalis	9.72743	0.640297	-9.08713	0.934176
Marinobacter sp. ELB17	10.5355	1.45021	-9.08533	0.86235
Pseudomonas kuykendallii	25.4079	16.3313	-9.07661	0.357235
Paraprevotella clara	10.4156	1.35067	-9.06493	0.870322
Delftia sp. 67-8	16.2144	7.18949	-9.02495	0.5566
Pseudomonas sp. MB-090624	11.5845	2.56349	-9.02103	0.778714
Parabacteroides sp. An277	9.82716	0.814837	-9.01232	0.917083
Collimonas sp. OK242	13.2775	4.26797	-9.00953	0.678556
Acidovorax sp. Root275	14.3355	5.33034	-9.00515	0.628172
Bacteroidetes bacterium 38_7	11.0682	2.1035	-8.96474	0.809952
Flavobacterium subsaxonicum	14.0219	5.10486	-8.91704	0.635937
Pseudomonas meliae	9.96372	1.04715	-8.91657	0.894903
Flavobacterium sp. ACAM 123	9.45528	0.538913	-8.91637	0.943004
Bacteroidetes bacterium GWA2_31_9b	11.2909	2.39289	-8.89797	0.788069
Bacteroides faecichinchillae	18.8697	9.9722	-8.89754	0.471524
Plesiomonas_unclassified	9.4189	0.54019	-8.87871	0.942648
Rheinheimera perlucida	10.174	1.32738	-8.84666	0.869533
Massilia eurypsychrophila	32.3918	23.5554	-8.83637	0.272797
Pseudomonas sp. LM12	9.91447	1.07984	-8.83462	0.891084
Pedobacter sp. JDX94	12.7119	3.88105	-8.8309	0.694693
uncultured organism	21.2377	12.4221	-8.81567	0.415095
Roseburia hominis	9.18888	0.382805	-8.80608	0.95834
Alistipes sp. CAG:831	9.42899	0.626919	-8.80207	0.933512
Flavobacterium sp. AG291	12.3884	3.58959	-8.79877	0.710245
Parabacteroides sp. Marseille-P3668	9.59146	0.816357	-8.7751	0.914887
Tannerella sp. CAG:118	9.68469	0.913896	-8.77079	0.905635
Dysgonomonas capnocytophagoides	15.5038	6.74384	-8.76	0.565021
Sulfurospirillum sp. UBA12182	9.31719	0.584627	-8.73256	0.937253
Aliiarcobacter lanthieri	8.80182	0.0778948	-8.72393	0.99115
Bacteroidetes bacterium HGW-Bacteroidetes-5	10.1654	1.44804	-8.71736	0.857552
Pseudopedobacter saltans	21.3363	12.6249	-8.71137	0.408289
Fermentimonas caenicola	9.84681	1.15397	-8.69284	0.882808
Pedobacter sp. R20-19	9.96707	1.30301	-8.66405	0.869268
Nitrincola nitratireducens	10.0557	1.40476	-8.65092	0.860302
Pseudomonas sp. HMSC08G10	8.82347	0.183621	-8.63985	0.979189
Chryseobacterium hispalense	10.821	2.18234	-8.63861	0.798323
Marinobacter sp. DSM 26291	9.03348	0.423454	-8.61003	0.953124
Acinetobacter sp. YT-02	8.97506	0.371273	-8.60378	0.958633
Chryseobacterium taichungense	10.3624	1.76504	-8.5974	0.82967
Bacteroides sp. An19	9.55126	0.986615	-8.56464	0.896703
Chryseobacterium sp. FH1	9.77857	1.22389	-8.55468	0.874839
Pseudomonas sp. MR 02	10.0698	1.52934	-8.54045	0.848126
Herminiimonas fonticola	19.1989	10.6652	-8.53379	0.444493
Pseudomonas furukawaii	17.5671	9.03558	-8.53152	0.485653
Gammaproteobacteria bacterium HGW-Gammaproteobacteria-9	10.9812	2.4909	-8.49029	0.773166
Pseudomonas sp. HMWF034	9.16861	0.68635	-8.48226	0.925141
Pseudomonas sp. Irchel 3A18	9.18833	0.716967	-8.47136	0.92197
Ottowia sp. Marseille-P4747	11.4309	2.96266	-8.46826	0.740821
Shewanella amazonensis	9.66632	1.205	-8.46132	0.875341
Chryseobacterium polytrichastri	8.68433	0.23467	-8.44966	0.972978
Pseudomonas sp. NFACC37-1	9.60642	1.16845	-8.43797	0.878368
Photobacterium ganghwense	8.97296	0.545271	-8.42769	0.939232
Bacteroidetes bacterium HGW-Bacteroidetes-22	10.363	1.93803	-8.42493	0.812985
Pseudomonas sp. Choline-3u-10	9.30356	0.892418	-8.41114	0.904078
Photobacterium profundum	9.04671	0.638303	-8.40841	0.929444
Bacteroides coprophilus CAG:333	8.64192	0.238739	-8.40318	0.972374
Flavobacteriales bacterium CG_4_8_14_3_um_filter_35_10	8.96238	0.563399	-8.39898	0.937137
Eisenbergiella tayi	8.90428	0.553035	-8.35125	0.937891
Colwellia aestuarii	8.99264	0.658193	-8.33444	0.926808
Marinobacterium rhizophilum	9.52372	1.19051	-8.33321	0.874995
Thiomonas sp. CB2	43.3816	35.0612	-8.32046	0.191797
Arcobacter sp. FW59	8.42697	0.121572	-8.30539	0.985573
Cronobacter sakazakii	14.7918	6.48744	-8.30438	0.561417
Stenotrophomonas sp. BIIR7	15.2547	6.96218	-8.29253	0.543604
Agarivorans gilvus	10.87	2.59244	-8.27761	0.761506
Clostridiales bacterium Choco116	8.69026	0.418142	-8.27211	0.951884
Bacteroidetes bacterium GWA2_31_9	12.046	3.78666	-8.25932	0.68565
Paraglaciecola hydrolytica	8.28168	0.026102	-8.25557	0.996848
Paraburkholderia terricola	10.2334	1.98238	-8.25107	0.806284
Sulfurimonas sp.	8.88499	0.637977	-8.24702	0.928196
Prevotella sp. CAG:1092	16.8618	8.62803	-8.23382	0.488311
Lactobacillus fermentum	17.6386	9.41073	-8.22787	0.466469
Acinetobacter sp. MYb10	8.33873	0.123794	-8.21494	0.985154
Pseudomonas sp. 63_8	8.27704	0.0642015	-8.21284	0.992243
Salinicola salarius	12.1286	3.91695	-8.21162	0.677048
Porphyromonadaceae bacterium KHP3R9	9.30433	1.09396	-8.21036	0.882424
Vibrio furnissii	8.55818	0.365322	-8.19286	0.957313
Barnesiella sp. An22	8.89087	0.701914	-8.18896	0.921052
Sunxiuqinia dokdonensis	21.0461	12.8674	-8.1787	0.388608
Pseudomonas sp. MPBD7-1	9.27614	1.12303	-8.15312	0.878934
Bacteroides sp. 3_1_19	9.14552	1.00334	-8.14218	0.890292
[truncated: 1,046,576+ more rows]
