# Supplementary material for: Metagenomics Insights Into the Microbial Diversity and Microbiome Network Analysis on the Heterogeneity of Influent to Effluent Water
Source: Front Microbiol. 2022 Apr 14;13:779196. doi: 10.3389/fmicb.2022.779196 (PMC9048743; doi:10.3389/fmicb.2022.779196)
Supplement: Supplementary file 3 [file Table_2.XLSX]

## Sheet: Sheet1
AROid	Protein	geneID	species	DNA Accession	AMR Gene Family	Drug Class	Resistance Mechanism
ARO:3002524	AAC44793.1	AAC(2')-Ib	Mycolicibacterium fortuitum	U41471	AAC(2')	aminoglycoside	inactivation
ARO:3002525	CCP42991.1	AAC(2')-Ic	Mycobacterium tuberculosis H37Rv	AL123456.3	AAC(2')	aminoglycoside	inactivation
ARO:3004628	BAM16262.1	AAC(2')-IIa	Burkholderia glumae	AB669090.1	AAC(2')	aminoglycoside	inactivation
ARO:3002528	AAG15269.1	AAC(3)-Ia	Pseudomonas aeruginosa	U12338	AAC(3)	aminoglycoside	inactivation
ARO:3002530	AAA88422.1	AAC(3)-Ib	Pseudomonas aeruginosa	L06157	AAC(3)	aminoglycoside	inactivation
ARO:3002531	CAD53575.1	AAC(3)-Ic	Pseudomonas aeruginosa	AJ511268	AAC(3)	aminoglycoside	inactivation
ARO:3002534	AAA26548.1	AAC(3)-IIb	Serratia marcescens	M97172	AAC(3)	aminoglycoside	inactivation
ARO:3002537	KSC15183.1	AAC(3)-IIIb	Pseudomonas aeruginosa	LLLC01000048.1	AAC(3)	aminoglycoside	inactivation
ARO:3002539	ABB43029.1	AAC(3)-IV	Escherichia coli	DQ241380.1	AAC(3)	aminoglycoside	inactivation
ARO:3002540	AAA16194.1	AAC(3)-VIa	Enterobacter cloacae	M88012	AAC(3)	aminoglycoside	inactivation
ARO:3002544	BAA78619.1	AAC(3)-Xa	Streptomyces griseus	AB028210.1	AAC(3)	aminoglycoside	inactivation
ARO:3002599	CAE48335.2	AAC(6')-30/AAC(6')-Ib' fusion protein	Pseudomonas aeruginosa	AJ584652	AAC(6')	aminoglycoside	inactivation
ARO:3002585	CAK55557.1	AAC(6')-31	Pseudomonas putida	AM283489	AAC(6')	aminoglycoside	inactivation
ARO:3002586	ABR10839.1	AAC(6')-32	Pseudomonas aeruginosa	EF614235	AAC(6')	aminoglycoside	inactivation
ARO:3002587	AEZ05106.1	AAC(6')-33	Escherichia coli	JN596280	AAC(6')	aminoglycoside	inactivation
ARO:3003989	APB03223.1	AAC(6')-34	Paenibacillus sp. LC231	KX531053.1	AAC(6')	aminoglycoside	inactivation
ARO:3002545	AAA98298.1	AAC(6')-Ia	Plasmid R	M18967	AAC(6')	aminoglycoside	inactivation
ARO:3002571	AAL20537.1	AAC(6')-Iaa	Salmonella enterica subsp. enterica serovar Typhimurium str. LT2	AE006468.2	AAC(6')	aminoglycoside	inactivation
ARO:3002572	BAD12078.1	AAC(6')-Iad	Acinetobacter pittii	AB119105	AAC(6')	aminoglycoside	inactivation
ARO:3004638	BAN78519.1	AAC(6')-Iag	Pseudomonas aeruginosa	AB472901.2	AAC(6')	aminoglycoside	inactivation
ARO:3002575	ACI28880.1	AAC(6')-Iai	Pseudomonas aeruginosa	EU886977	AAC(6')	aminoglycoside	inactivation
ARO:3003677	BAM46120.1	AAC(6')-Iaj	Pseudomonas aeruginosa	AB709942	AAC(6')	aminoglycoside	inactivation
ARO:3003199	BAO21229.1	AAC(6')-Iak	Stenotrophomonas maltophilia	AB894482.1	AAC(6')	aminoglycoside	inactivation
ARO:3003200	BAQ22025.1	AAC(6')-Ian	Serratia marcescens	AP014611	AAC(6')	aminoglycoside	inactivation
ARO:3002546	AFJ11384.1	AAC(6')-Ib	Klebsiella pneumoniae	JQ808129	AAC(3);AAC(6')	aminoglycoside	inactivation
ARO:3002581	AAC46343.1	AAC(6')-Ib10	Pseudomonas aeruginosa	U59183	AAC(6')	aminoglycoside	inactivation
ARO:3002582	AAN41403.1	AAC(6')-Ib11	Salmonella enterica subsp. enterica serovar Typhimurium	AY136758	AAC(6')	aminoglycoside	inactivation
ARO:3002578	AKN19287.1	AAC(6')-Ib7	Salmonella enterica subsp. enterica serovar Corvallis	Y11946.1	AAC(6')	aminoglycoside	inactivation
ARO:3002579	AIK02012.1	AAC(6')-Ib8	Enterobacter cloacae	KF998105.1	AAC(6')	aminoglycoside	inactivation
ARO:3002547	ABC17627.1	AAC(6')-Ib-cr	Escherichia coli	DQ303918	AAC(6')	fluoroquinolone ;aminoglycoside	inactivation
ARO:3002593	BAD11815.1	AAC(6')-Ib-SK	Streptomyces kanamyceticus	AB164230	AAC(6')	aminoglycoside	inactivation
ARO:3002549	AAA26549.1	AAC(6')-Ic	Serratia marcescens	M94066	AAC(6')	aminoglycoside	inactivation
ARO:3002597	AAA88548.1	AAC(6')-Ie-APH(2'')-Ia	Staphylococcus aureus	GU565967.1	APH(2'');AAC(6')	aminoglycoside	inactivation
ARO:3002553	CAA39038.1	AAC(6')-If	Enterobacter cloacae	X55353	AAC(6')	aminoglycoside	inactivation
ARO:3002554	AAA21889.1	AAC(6')-Ig	Acinetobacter haemolyticus	L09246	AAC(6')	aminoglycoside	inactivation
ARO:3002555	AAC41391.1	AAC(6')-Ih	Acinetobacter baumannii	L29044	AAC(6')	aminoglycoside	inactivation
ARO:3002594	AAM92464.1	AAC(6')-IIa	Salmonella enterica subsp. enterica serovar Typhi	AY123251	AAC(6')	aminoglycoside	inactivation
ARO:3002595	AAA25680.1	AAC(6')-IIb	Pseudomonas fluorescens	L06163	AAC(6')	aminoglycoside	inactivation
ARO:3002596	AAD46626.1	AAC(6')-IIc	Pseudomonas aeruginosa	AF162771	AAC(6')	aminoglycoside	inactivation
ARO:3002557	AAC41392.1	AAC(6')-Ij	Acinetobacter genomosp. 13	L29045	AAC(6')	aminoglycoside	inactivation
ARO:3002558	AAA87229.1	AAC(6')-Ik	Acinetobacter sp. CIP-A165	L29510	AAC(6')	aminoglycoside	inactivation
ARO:3004635	AAA90937.1	AAC(6')-Il	Klebsiella aerogenes Partial	U13880.2	AAC(6')	aminoglycoside	inactivation
ARO:3004629	AAK63041.1	AAC(6')-Im	Escherichia coli	AF337947.1	AAC(6')	aminoglycoside	inactivation
ARO:3002559	CAA91010.1	AAC(6')-Ip	Citrobacter freundii	Z54241.1	AAC(6')	aminoglycoside	inactivation
ARO:3002563	BAD10948.2	AAC(6')-Isa	Streptomyces albulus	AB116646	AAC(6')	aminoglycoside	inactivation
ARO:3002564	AAD03492.1	AAC(6')-It	Acinetobacter genomosp. 16BJ	AF031328	AAC(6')	aminoglycoside	inactivation
ARO:3002566	AAD03494.1	AAC(6')-Iv	Acinetobacter sp. 631	AF031330	AAC(6')	aminoglycoside	inactivation
ARO:3002567	AAD03495.1	AAC(6')-Iw	Acinetobacter sp. 640	AF031331	AAC(6')	aminoglycoside	inactivation
ARO:3002568	AAD03496.1	AAC(6')-Ix	Acinetobacter sp. BM2722	AF031332	AAC(6')	aminoglycoside	inactivation
ARO:3002569	AAF03531.1	AAC(6')-Iy	Salmonella enterica subsp. enterica serovar Enteritidis	AF144880	AAC(6')	aminoglycoside	inactivation
ARO:3002570	AAD52985.1	AAC(6')-Iz	Stenotrophomonas maltophilia	AF140221	AAC(6')	aminoglycoside	inactivation
ARO:3004641	AEA07977.1	aacA43	Klebsiella pneumoniae	HQ247816.1	AAC(6')	aminoglycoside	inactivation
ARO:3004692	AAL36430.1	aadA10	Pseudomonas aeruginosa	U37105.2	ANT(3'')	aminoglycoside	inactivation
ARO:3002613	ABW91178.1	aadA13	Pseudomonas aeruginosa	EU746499.1	ANT(3'')	aminoglycoside	inactivation
ARO:3002616	ACF17980.1	aadA16	Escherichia coli	EU675686	ANT(3'')	aminoglycoside	inactivation
ARO:3002617	ACK43806.1	aadA17	Aeromonas media	FJ460181	ANT(3'')	aminoglycoside	inactivation
ARO:3004682	CTQ57092.1	aadA27	Acinetobacter lwoffii	LN873256.1	ANT(3'')	aminoglycoside	inactivation
ARO:3002604	AAN34365.1	aadA4	Acinetobacter baumannii	AY138986	ANT(3'')	aminoglycoside	inactivation
ARO:3002605	AAF17880.1	aadA5	Escherichia coli	AF137361	ANT(3'')	aminoglycoside	inactivation
ARO:3002606	CAJ32504.1	aadA6	Pseudomonas aeruginosa	AM087411	ANT(3'')	aminoglycoside	inactivation
ARO:3002607	BAD00739.1	aadA7	Vibrio fluvialis	AB114632	ANT(3'')	aminoglycoside	inactivation
ARO:3002627	CAB14620.1	aadK	Bacillus subtilis subsp. subtilis str. 168	AL009126	ANT(6)	aminoglycoside	inactivation
ARO:3004683	AAA27459.1	aadS	Transposon Tn4551	M72415.1	ANT(6)	aminoglycoside	inactivation
ARO:3003942	XP_753111.1	abcA	Aspergillus fumigatus Af293	XM_748018.1	ATP-binding cassette (ABC) efflux pump	macrolide ;fluoroquinolone ;cephalosporin;penam;tetracycline ;peptide ;acridine dye;rifamycin ;pleuromutilin ;nitroimidazole	efflux
ARO:3000753	BAD89844.2	abeM	Acinetobacter baumannii	AB204810	multidrug and toxic compound extrusion (MATE) transporter	fluoroquinolone ;glycylcycline;tetracycline ;acridine dye;triclosan	efflux
ARO:3000768	ACJ59254.1	abeS	Acinetobacter baumannii AB307-0294	CP001172.1	small multidrug resistance (SMR) efflux pump	macrolide ;aminoglycoside ;tetracycline ;aminocoumarin ;phenicol	efflux
ARO:3001815	CAB46491.1	ACC-1	Klebsiella pneumoniae	AJ133121	ACC beta-lactamase	monobactam;cephalosporin;penam	inactivation
ARO:3001816	AAF86691.1	ACC-2	Hafnia alvei	AF180952	ACC beta-lactamase	monobactam;cephalosporin;penam	inactivation
ARO:3001817	AAF86697.1	ACC-3	Hafnia alvei	AF180958	ACC beta-lactamase	monobactam;cephalosporin;penam	inactivation
ARO:3001818	ABP49606.1	ACC-4	Escherichia coli	EF504260	ACC beta-lactamase	monobactam;cephalosporin;penam	inactivation
ARO:3001819	CCK86740.1	ACC-5	Hafnia alvei	HE819401	ACC beta-lactamase	monobactam;cephalosporin;penam	inactivation
ARO:3004359	CAB51471.1	ACI-1	Acidaminococcus fermentans	AJ007350.1	ACI beta-lactamase	cephalosporin;penam;penem	inactivation
ARO:3004573	ABO11759.2	Acinetobacter baumannii AbaF	Acinetobacter baumannii ATCC 17978	CP000521.1	major facilitator superfamily (MFS) efflux pump	macrolide ;fluoroquinolone ;lincosamide ;fosfomycin;cephalosporin;glycylcycline;bicyclomycin;penam;nucleoside ;tetracycline ;peptide ;acridine dye;oxazolidinone ;rifamycin ;diaminopyrimidine ;phenicol ;isoniazid;benzalkonium chloride;rhodamine;antibacterial free fatty acids;nitroimidazole	efflux
ARO:3004574	ACJ41547.2	Acinetobacter baumannii AbaQ	Acinetobacter baumannii AB0057	CP001182.2	major facilitator superfamily (MFS) efflux pump	macrolide ;fluoroquinolone ;lincosamide ;fosfomycin;cephalosporin;glycylcycline;bicyclomycin;penam;nucleoside ;tetracycline ;peptide ;acridine dye;oxazolidinone ;rifamycin ;diaminopyrimidine ;phenicol ;isoniazid;benzalkonium chloride;rhodamine;antibacterial free fatty acids;nitroimidazole	efflux
ARO:3004578	WP_001985623.1	Acinetobacter baumannii AbuO	Acinetobacter baumannii	NC_010410.1	resistance-nodulation-cell division (RND) efflux pump	macrolide ;fluoroquinolone ;monobactam;aminoglycoside ;carbapenem;cephalosporin;glycylcycline;penam;tetracycline ;acridine dye;aminocoumarin ;diaminopyrimidine ;phenicol ;triclosan;benzalkonium chloride;antibacterial free fatty acids	efflux
ARO:3004577	ACQ82816.1	Acinetobacter baumannii AmvA	Acinetobacter baumannii	FJ911554.1	major facilitator superfamily (MFS) efflux pump	macrolide ;fluoroquinolone ;lincosamide ;fosfomycin;cephalosporin;glycylcycline;bicyclomycin;penam;nucleoside ;tetracycline ;peptide ;acridine dye;oxazolidinone ;rifamycin ;diaminopyrimidine ;phenicol ;isoniazid;benzalkonium chloride;rhodamine;antibacterial free fatty acids;nitroimidazole	efflux
ARO:3003817	AJF82744.1	Acinetobacter baumannii gyrA conferring resistance to fluoroquinolones	Acinetobacter baumannii	CP010781.1	fluoroquinolone resistant gyrA	fluoroquinolone ;nybomycin	target alteration
ARO:3003818	ALJ89624.1	Acinetobacter baumannii parC conferring resistance to fluoroquinolone	Acinetobacter baumannii	CP012952.1	fluoroquinolone resistant parC	fluoroquinolone	target alteration
ARO:3003809	AHB92962.1	Acinetobacter OprD conferring resistance to imipenem	Acinetobacter baumannii ZW85-1	CP006768.1	Outer Membrane Porin (Opr)	monobactam;carbapenem;cephalosporin;cephamycin;penam;penem	reduced permeability to ;resistance by absence
ARO:3000216	AAC73564.1	acrB	Escherichia coli str. K-12 substr. MG1655	U00096.3	resistance-nodulation-cell division (RND) efflux pump	macrolide ;fluoroquinolone ;monobactam;aminoglycoside ;carbapenem;cephalosporin;glycylcycline;penam;tetracycline ;acridine dye;aminocoumarin ;rifamycin ;diaminopyrimidine ;phenicol ;triclosan;antibacterial free fatty acids	efflux
ARO:3000491	BAA16344.1	acrD	Escherichia coli str. K-12 substr. W3110	AP009048.1	resistance-nodulation-cell division (RND) efflux pump	macrolide ;fluoroquinolone ;monobactam;aminoglycoside ;carbapenem;glycylcycline;penam;tetracycline ;acridine dye;aminocoumarin ;diaminopyrimidine ;phenicol ;triclosan;antibacterial free fatty acids	efflux
ARO:3000499	AAC76297.1	acrE	Escherichia coli str. K-12 substr. MG1655	U00096	resistance-nodulation-cell division (RND) efflux pump	macrolide ;fluoroquinolone ;monobactam;aminoglycoside ;carbapenem;cephalosporin;glycylcycline;cephamycin;penam;tetracycline ;acridine dye;aminocoumarin ;diaminopyrimidine ;phenicol ;triclosan;antibacterial free fatty acids	efflux
ARO:3000502	AAC76298.1	acrF	Escherichia coli str. K-12 substr. MG1655	U00096	resistance-nodulation-cell division (RND) efflux pump	macrolide ;fluoroquinolone ;monobactam;aminoglycoside ;carbapenem;cephalosporin;glycylcycline;cephamycin;penam;tetracycline ;acridine dye;aminocoumarin ;diaminopyrimidine ;phenicol ;triclosan;antibacterial free fatty acids	efflux
ARO:3000656	AAC76296.1	acrS	Escherichia coli str. K-12 substr. MG1655	U00096	resistance-nodulation-cell division (RND) efflux pump	macrolide ;fluoroquinolone ;monobactam;aminoglycoside ;carbapenem;cephalosporin;glycylcycline;cephamycin;penam;tetracycline ;acridine dye;aminocoumarin ;rifamycin ;diaminopyrimidine ;phenicol ;triclosan;antibacterial free fatty acids	efflux
ARO:3001821	AAC45086.2	ACT-1	Klebsiella pneumoniae	U58495	ACT beta-lactamase	carbapenem;cephalosporin;cephamycin;penam	inactivation
ARO:3001834	AFU25650.1	ACT-12	Enterobacter cloacae	JX440355	ACT beta-lactamase	carbapenem;cephalosporin;cephamycin;penam	inactivation
ARO:3001836	AFU25647.1	ACT-14	Enterobacter cloacae	JX440354	ACT beta-lactamase	carbapenem;cephalosporin;cephamycin;penam	inactivation
ARO:3001827	BAM34463.1	ACT-16	Enterobacter cloacae	AB737978	ACT beta-lactamase	carbapenem;cephalosporin;cephamycin;penam	inactivation
ARO:3001838	AHM76771.1	ACT-17	Enterobacter cloacae	KF992026	ACT beta-lactamase	carbapenem;cephalosporin;cephamycin;penam	inactivation
ARO:3001839	AHM76777.1	ACT-18	Enterobacter cloacae	KF992028	ACT beta-lactamase	carbapenem;cephalosporin;cephamycin;penam	inactivation
ARO:3001840	AHM76779.1	ACT-19	Enterobacter cloacae	KF992029	ACT beta-lactamase	carbapenem;cephalosporin;cephamycin;penam	inactivation
ARO:3001841	AHA80105.1	ACT-20	Enterobacter hormaechei	KF526117	ACT beta-lactamase	carbapenem;cephalosporin;cephamycin;penam	inactivation
ARO:3001842	AHA80106.1	ACT-21	Enterobacter hormaechei	KF526118	ACT beta-lactamase	carbapenem;cephalosporin;cephamycin;penam	inactivation
ARO:3001843	AHM76774.1	ACT-22	Enterobacter cloacae	KF992027	ACT beta-lactamase	carbapenem;cephalosporin;cephamycin;penam	inactivation
ARO:3001828	AGU38146.1	ACT-23	Enterobacter cloacae	KF515536	ACT beta-lactamase	carbapenem;cephalosporin;cephamycin;penam	inactivation
ARO:3001844	AHL39336.1	ACT-24	Enterobacter cloacae	KJ207207	ACT beta-lactamase	carbapenem;cephalosporin;cephamycin;penam	inactivation
ARO:3001845	AHL39338.1	ACT-25	Enterobacter cloacae	KJ207208	ACT beta-lactamase	carbapenem;cephalosporin;cephamycin;penam	inactivation
ARO:3001847	AHL39340.1	ACT-27	Enterobacter cloacae	KJ207209	ACT beta-lactamase	carbapenem;cephalosporin;cephamycin;penam	inactivation
ARO:3001848	AHL39333.1	ACT-28	Enterobacter cloacae	KJ207206	ACT beta-lactamase	carbapenem;cephalosporin;cephamycin;penam	inactivation
ARO:3001850	AIT76086.1	ACT-30	Enterobacter cloacae	KM087833	ACT beta-lactamase	carbapenem;cephalosporin;cephamycin;penam	inactivation
ARO:3001851	AIT76096.1	ACT-31	Enterobacter cloacae	KM087843	ACT beta-lactamase	carbapenem;cephalosporin;cephamycin;penam	inactivation
ARO:3001853	AIT76087.1	ACT-33	Enterobacter cloacae	KM087834.1	ACT beta-lactamase	carbapenem;cephalosporin;cephamycin;penam	inactivation
ARO:3001855	BAP68758.1	ACT-35	Enterobacter cloacae	LC004922	ACT beta-lactamase	carbapenem;cephalosporin;cephamycin;penam	inactivation
ARO:3003171	AJG06170.1	ACT-36	Enterobacter cloacae	KM926621	ACT beta-lactamase	carbapenem;cephalosporin;cephamycin;penam	inactivation
ARO:3003172	AJG06172.1	ACT-37	Enterobacter cloacae	KM926622	ACT beta-lactamase	carbapenem;cephalosporin;cephamycin;penam	inactivation
ARO:3003655	AKS43590.1	ACT-38	Citrobacter freundii	KP836350.1	ACT beta-lactamase	carbapenem;cephalosporin;cephamycin;penam	inactivation
ARO:3001824	ACJ05689.1	ACT-5	Escherichia coli	FJ237369	ACT beta-lactamase	carbapenem;cephalosporin;cephamycin;penam	inactivation
ARO:3001830	ACJ05688.1	ACT-7	Klebsiella pneumoniae	FJ237368	ACT beta-lactamase	carbapenem;cephalosporin;cephamycin;penam	inactivation
ARO:3001831	CBI75448.1	ACT-8	Escherichia coli	FN645445.1	ACT beta-lactamase	carbapenem;cephalosporin;cephamycin;penam	inactivation
ARO:3001826	AEI70575.1	ACT-9	Pantoea agglomerans	HQ693810	ACT beta-lactamase	carbapenem;cephalosporin;cephamycin;penam	inactivation
ARO:3003847	CAB77444.1	ADC-1	Acinetobacter baumannii	AJ009979.1	ADC beta-lactamase without carbapenemase activity	cephalosporin	inactivation
ARO:3003855	ABI18382.1	ADC-10	Acinetobacter baumannii	DQ883640.1	ADC beta-lactamase without carbapenemase activity	cephalosporin	inactivation
ARO:3003862	CAK95243.1	ADC-18	Acinetobacter pittii	AM283523.1	ADC beta-lactamase without carbapenemase activity	cephalosporin	inactivation
ARO:3003867	CAK95238.1	ADC-23	Acinetobacter pittii	AM283518.1	ADC beta-lactamase without carbapenemase activity	cephalosporin	inactivation
ARO:3003849	AAO59456.1	ADC-3	Acinetobacter baumannii	AY178995.1	ADC beta-lactamase without carbapenemase activity	cephalosporin	inactivation
ARO:3003876	ACN62073.1	ADC-44	Acinetobacter pittii	FJ744163.1	ADC beta-lactamase without carbapenemase activity	cephalosporin	inactivation
ARO:3003880	ALA14809.1	ADC-74	Acinetobacter baumannii	KP881234.1	ADC beta-lactamase without carbapenemase activity	cephalosporin	inactivation
ARO:3003854	CAL25116.3	ADC-8	Acinetobacter baylyi ADP1	AM293332.3	ADC beta-lactamase without carbapenemase activity	cephalosporin	inactivation
ARO:3003887	ALA14816.1	ADC-81	Acinetobacter baumannii	KP881241.1	ADC beta-lactamase without carbapenemase activity	cephalosporin	inactivation
ARO:3000774	AAL14439.1	adeA	Acinetobacter baumannii	AF370885.1	resistance-nodulation-cell division (RND) efflux pump	macrolide ;fluoroquinolone ;monobactam;aminoglycoside ;carbapenem;glycylcycline;penam;tetracycline ;acridine dye;aminocoumarin ;diaminopyrimidine ;phenicol ;triclosan;antibacterial free fatty acids	efflux
ARO:3000775	AAL14440.1	adeB	Acinetobacter baumannii	AF370885.1	resistance-nodulation-cell division (RND) efflux pump	macrolide ;fluoroquinolone ;monobactam;aminoglycoside ;carbapenem;glycylcycline;penam;tetracycline ;acridine dye;aminocoumarin ;diaminopyrimidine ;phenicol ;triclosan;antibacterial free fatty acids	efflux
ARO:3003811	ALX99516.1	adeC	Acinetobacter baumannii	CP013924.1	resistance-nodulation-cell division (RND) efflux pump	macrolide ;fluoroquinolone ;monobactam;aminoglycoside ;carbapenem;glycylcycline;penam;tetracycline ;acridine dye;aminocoumarin ;diaminopyrimidine ;phenicol ;triclosan;antibacterial free fatty acids	efflux
ARO:3000777	CAJ77856.1	adeF	Acinetobacter baumannii AYE	CT025801.2	resistance-nodulation-cell division (RND) efflux pump	macrolide ;fluoroquinolone ;monobactam;aminoglycoside ;carbapenem;glycylcycline;penam;tetracycline ;acridine dye;aminocoumarin ;diaminopyrimidine ;phenicol ;triclosan;antibacterial free fatty acids	efflux
ARO:3000778	CAJ77857.1	adeG	Acinetobacter baumannii AYE	CT025800.2	resistance-nodulation-cell division (RND) efflux pump	macrolide ;fluoroquinolone ;monobactam;aminoglycoside ;carbapenem;glycylcycline;penam;tetracycline ;acridine dye;aminocoumarin ;diaminopyrimidine ;phenicol ;triclosan;antibacterial free fatty acids	efflux
ARO:3000779	CAJ77855.1	adeH	Acinetobacter baumannii AYE	CT025802.2	resistance-nodulation-cell division (RND) efflux pump	macrolide ;fluoroquinolone ;monobactam;aminoglycoside ;carbapenem;glycylcycline;penam;tetracycline ;acridine dye;aminocoumarin ;diaminopyrimidine ;phenicol ;triclosan;antibacterial free fatty acids	efflux
ARO:3000780	ACJ41739.1	adeI	Acinetobacter baumannii AB0057	CP001182.2	resistance-nodulation-cell division (RND) efflux pump	macrolide ;fluoroquinolone ;monobactam;aminoglycoside ;lincosamide ;carbapenem;cephalosporin;glycylcycline;penam;tetracycline ;acridine dye;aminocoumarin ;rifamycin ;diaminopyrimidine ;phenicol ;triclosan;penem;antibacterial free fatty acids	efflux
ARO:3000781	AAX14802.1	adeJ	Acinetobacter baumannii	AY769962	resistance-nodulation-cell division (RND) efflux pump	macrolide ;fluoroquinolone ;monobactam;aminoglycoside ;lincosamide ;carbapenem;cephalosporin;glycylcycline;penam;tetracycline ;acridine dye;aminocoumarin ;rifamycin ;diaminopyrimidine ;phenicol ;triclosan;penem;antibacterial free fatty acids	efflux
ARO:3000782	AAX14803.1	adeK	Acinetobacter baumannii	AY769962	resistance-nodulation-cell division (RND) efflux pump	macrolide ;fluoroquinolone ;monobactam;aminoglycoside ;lincosamide ;carbapenem;cephalosporin;glycylcycline;penam;tetracycline ;acridine dye;aminocoumarin ;rifamycin ;diaminopyrimidine ;phenicol ;triclosan;penem;antibacterial free fatty acids	efflux
ARO:3000620	ALH22601.1	adeL	Acinetobacter baumannii	KR297239.1	resistance-nodulation-cell division (RND) efflux pump	macrolide ;fluoroquinolone ;monobactam;aminoglycoside ;carbapenem;glycylcycline;penam;tetracycline ;acridine dye;aminocoumarin ;diaminopyrimidine ;phenicol ;triclosan;antibacterial free fatty acids	efflux
ARO:3000559	AGV28567.1	adeN	Acinetobacter baumannii	KF147862	resistance-nodulation-cell division (RND) efflux pump	macrolide ;fluoroquinolone ;monobactam;aminoglycoside ;lincosamide ;carbapenem;cephalosporin;glycylcycline;penam;tetracycline ;acridine dye;aminocoumarin ;rifamycin ;diaminopyrimidine ;phenicol ;triclosan;penem;antibacterial free fatty acids	efflux
ARO:3000553	ADM92605.1	adeR	Acinetobacter baumannii	HM440348	resistance-nodulation-cell division (RND) efflux pump	macrolide ;fluoroquinolone ;monobactam;aminoglycoside ;carbapenem;glycylcycline;penam;tetracycline ;acridine dye;aminocoumarin ;diaminopyrimidine ;phenicol ;triclosan;antibacterial free fatty acids	efflux
ARO:3000549	ADM92606.1	adeS	Acinetobacter baumannii	HM440348	resistance-nodulation-cell division (RND) efflux pump	macrolide ;fluoroquinolone ;monobactam;aminoglycoside ;carbapenem;glycylcycline;penam;tetracycline ;acridine dye;aminocoumarin ;diaminopyrimidine ;phenicol ;triclosan;antibacterial free fatty acids	efflux
ARO:3002481	AAC09015.1	AER-1	Aeromonas hydrophila	U14748	AER beta-lactamase	penam	inactivation
ARO:3004451	AAA22081.1	Agrobacterium fabrum chloramphenicol acetyltransferase	Agrobacterium fabrum str. C58	M58472.1	chloramphenicol acetyltransferase (CAT)	phenicol	inactivation
ARO:3000853	CAQ53840.1	AIM-1	Pseudomonas aeruginosa	AM998375	AIM beta-lactamase	cephalosporin;cephamycin;penam	inactivation
ARO:3004364	AAF94731.1	almG	Vibrio cholerae O1 biovar El Tor str. N16961	AE003852.1	lipid A acyltransferase	peptide	target alteration
ARO:3004614	CBI75871.1	ampS	Bartonella clarridgeiae 73	FN645454.1	ampC-type beta-lactamase	cephalosporin;penam	inactivation
ARO:3002982	CAH35803.1	amrA	Burkholderia pseudomallei K96243	BX571965.1	resistance-nodulation-cell division (RND) efflux pump	macrolide ;fluoroquinolone ;monobactam;aminoglycoside ;carbapenem;glycylcycline;penam;tetracycline ;acridine dye;aminocoumarin ;diaminopyrimidine ;phenicol ;triclosan;antibacterial free fatty acids	efflux
ARO:3002983	CAH35802.1	amrB	Burkholderia pseudomallei K96243	BX571965.1	resistance-nodulation-cell division (RND) efflux pump	macrolide ;fluoroquinolone ;monobactam;aminoglycoside ;carbapenem;glycylcycline;penam;tetracycline ;acridine dye;aminocoumarin ;diaminopyrimidine ;phenicol ;triclosan;antibacterial free fatty acids	efflux
ARO:3000230	AAC64365.1	ANT(2'')-Ia	Pseudomonas aeruginosa	AF078527	ANT(2'')	aminoglycoside	inactivation
ARO:3004089	CAA26199.1	ANT(3'')-IIa	Escherichia coli	X02340.1	ANT(3'')	aminoglycoside	inactivation
ARO:3002598	AAL51021.2	ANT(3'')-Ii-AAC(6')-IId fusion protein	Serratia marcescens	AF453998	AAC(6');ANT(3'')	aminoglycoside	inactivation
ARO:3002629	CBH51824.1	ANT(6)-Ib	Campylobacter fetus subsp. fetus	FN594949	ANT(6)	aminoglycoside	inactivation
ARO:3004045	AAC74370.1	resistant fabI	Escherichia coli str. K-12 substr. MG1655	U00096.3	resistant fabI	isoniazid;triclosan	target alteration
ARO:3002635	AAK63040.1	APH(2'')-IIa	Escherichia coli	AF337947	APH(2'')	aminoglycoside	inactivation
ARO:3002636	AAB49832.1	APH(2'')-IIIa	Enterococcus gallinarum	U51479	APH(2'')	aminoglycoside	inactivation
ARO:3002637	AAC14693.1	APH(2'')-IVa	Enterococcus casseliflavus	AF016483	APH(2'')	aminoglycoside	inactivation
ARO:3002641	CAE51638.1	APH(3')-Ia	Serratia marcescens	BX664015.1	APH(3')	aminoglycoside	inactivation
ARO:3002642	AAA26412.1	APH(3')-Ib	Plasmid RP4	M20305	APH(3')	aminoglycoside	inactivation
ARO:3002639	ABK33456.1	APH(3'')-Ib	Pseudomonas aeruginosa	AF313472	APH(3'')	aminoglycoside	inactivation
ARO:3002644	CAA23892.1	APH(3')-IIa	Escherichia coli	V00618.1	APH(3')	aminoglycoside	inactivation
ARO:3002645	CAA62365.1	APH(3')-IIb	Pseudomonas aeruginosa	X90856	APH(3')	aminoglycoside	inactivation
ARO:3002646	ADQ43421.1	APH(3')-IIc	Stenotrophomonas maltophilia	HQ424460	APH(3')	aminoglycoside	inactivation
ARO:3002647	AGV10830.1	APH(3')-IIIa	Campylobacter coli CVM N29710	CP004067	APH(3')	aminoglycoside	inactivation
ARO:3002648	CAA27061.1	APH(3')-IVa	Bacillus circulans	X03364	APH(3')	aminoglycoside	inactivation
ARO:3004087	ENV34035	APH(3')-IX	Acinetobacter gerneri DSM 14967 = CIP 107464	APPN01000061.1	APH(3')	aminoglycoside	inactivation
ARO:3002652	CAA30578.1	APH(3')-VIa	Acinetobacter baumannii	X07753	APH(3')	aminoglycoside	inactivation
ARO:3004086	EPF73263	APH(3')-VIII	Acinetobacter rudis CIP 110305	ATGI01000028.1	APH(3')	aminoglycoside	inactivation
ARO:3002655	CAA24743.1	APH(4)-Ia	Escherichia coli	V01499	APH(4)	aminoglycoside	inactivation
ARO:3002657	CAA68516.1	APH(6)-Ia	Streptomyces griseus	Y00459	APH(6)	aminoglycoside	inactivation
ARO:3002658	CAA29136.1	APH(6)-Ib	Streptomyces glaucescens	X05648	APH(6)	aminoglycoside	inactivation
ARO:3002659	CAA25854.1	APH(6)-Ic	Escherichia coli	X01702	APH(6)	aminoglycoside	inactivation
ARO:3002660	AAC23556.1	APH(6)-Id	Pseudomonas aeruginosa	AF024602	APH(6)	aminoglycoside	inactivation
ARO:3002662	AAB58447.1	APH(9)-Ia	Legionella pneumophila 130b	U94857	APH(9)	aminoglycoside	inactivation
ARO:3003918	CBL58181.1	apmA	Staphylococcus aureus	FN806789.3	amp acetyltransferase	aminoglycoside	inactivation
ARO:3002993	BAM76830.1	AQU-1	Aeromonas dhakensis	AB765395	AQU beta-lactamase	cephalosporin	inactivation
ARO:3004647	AHF82023.1	AQU-2	Aeromonas hydrophila	KF730243.1	AQU beta-lactamase	cephalosporin	inactivation
ARO:3004648	AHF82024.1	AQU-3	Aeromonas dhakensis	KF730244.1	AQU beta-lactamase	cephalosporin	inactivation
ARO:3000839	ABD30512.1	arlS	Staphylococcus aureus subsp. aureus NCTC 8325	CP000253.1	major facilitator superfamily (MFS) efflux pump	macrolide ;fluoroquinolone ;lincosamide ;fosfomycin;cephalosporin;glycylcycline;bicyclomycin;penam;nucleoside ;tetracycline ;peptide ;acridine dye;oxazolidinone ;rifamycin ;diaminopyrimidine ;phenicol ;isoniazid;benzalkonium chloride;rhodamine;antibacterial free fatty acids;nitroimidazole	efflux
ARO:3002985	AAG06942.1	arnA	Pseudomonas aeruginosa PAO1	AE004091.2	pmr phosphoethanolamine transferase	peptide	target alteration
ARO:3002846	AAC05822.1	arr-1	Mycolicibacterium smegmatis	AF001493	rifampin ADP-ribosyltransferase (Arr)	rifamycin	inactivation
ARO:3002847	AAC64366.1	arr-2	Pseudomonas aeruginosa	AF078527	rifampin ADP-ribosyltransferase (Arr)	rifamycin	inactivation
ARO:3002848	ACD56151.1	arr-3	Escherichia coli	EU675686	rifampin ADP-ribosyltransferase (Arr)	rifamycin	inactivation
ARO:3002849	ABV26705.1	arr-4	Pseudomonas aeruginosa	EF660562	rifampin ADP-ribosyltransferase (Arr)	rifamycin	inactivation
ARO:3004143	EGP45232.2	AxyX	Achromobacter insuavis AXX-A	AFRQ01000061.1	resistance-nodulation-cell division (RND) efflux pump	macrolide ;fluoroquinolone ;monobactam;aminoglycoside ;carbapenem;cephalosporin;glycylcycline;penam;tetracycline ;acridine dye;aminocoumarin ;diaminopyrimidine ;phenicol ;triclosan;antibacterial free fatty acids	efflux
ARO:3004144	EGP45231.1	AxyY	Achromobacter insuavis AXX-A	AFRQ01000061.1	resistance-nodulation-cell division (RND) efflux pump	macrolide ;fluoroquinolone ;monobactam;aminoglycoside ;carbapenem;cephalosporin;glycylcycline;penam;tetracycline ;acridine dye;aminocoumarin ;diaminopyrimidine ;phenicol ;triclosan;antibacterial free fatty acids	efflux
ARO:3004145	EGP45233.1	AxyZ	Achromobacter insuavis AXX-A	AFRQ01000061.1	resistance-nodulation-cell division (RND) efflux pump	macrolide ;fluoroquinolone ;monobactam;aminoglycoside ;carbapenem;cephalosporin;glycylcycline;penam;tetracycline ;acridine dye;aminocoumarin ;diaminopyrimidine ;phenicol ;triclosan;antibacterial free fatty acids	target alteration; efflux
ARO:3002986	AAC76093.1	bacA	Escherichia coli str. K-12 substr. MG1655	U00096.3	undecaprenyl pyrophosphate related proteins	peptide	target alteration
ARO:3002672	AAA22289.1	Bacillus pumilus cat86	Bacillus pumilus	K00544	chloramphenicol acetyltransferase (CAT)	phenicol	inactivation
ARO:3003324	CAX52582.1	Bacillus subtilis mprF	Bacillus subtilis subsp. subtilis str. 168	AL009126	defensin resistant mprF	peptide	target alteration
ARO:3003788	BAA85265	Bacillus subtilis pgsA mutations conferring resistance to daptomycin	Bacillus subtilis	AB016245	daptomycin resistant pgsA	peptide	target alteration
ARO:3000828	BAA15935.1	baeR	Escherichia coli str. K-12 substr. W3110	AP009048.1	resistance-nodulation-cell division (RND) efflux pump	macrolide ;fluoroquinolone ;monobactam;aminoglycoside ;carbapenem;glycylcycline;penam;tetracycline ;acridine dye;aminocoumarin ;diaminopyrimidine ;phenicol ;triclosan;antibacterial free fatty acids	efflux
ARO:3000829	BAA15934.1	baeS	Escherichia coli str. K-12 substr. W3110	AP009048	resistance-nodulation-cell division (RND) efflux pump	macrolide ;fluoroquinolone ;monobactam;aminoglycoside ;carbapenem;glycylcycline;penam;tetracycline ;acridine dye;aminocoumarin ;diaminopyrimidine ;phenicol ;triclosan;antibacterial free fatty acids	efflux
ARO:3003984	APB03218.1	BahA	Paenibacillus sp. LC231	KX531048.1	Bah amidohydrolase	peptide	inactivation
ARO:3003297	AAL82403.1	Bartonella bacilliformis gyrA conferring resistance to fluoroquinolones	Bartonella bacilliformis	AF469609	fluoroquinolone resistant gyrA	fluoroquinolone ;nybomycin	target alteration
ARO:3003302	ABM44583.1	Bartonella bacilliformis gyrB conferring resistance to aminocoumarin	Bartonella bacilliformis KC583	CP000524.1	aminocoumarin resistant gyrB	aminocoumarin	target alteration
ARO:3003582	AAG08162.1	basR	Pseudomonas aeruginosa PAO1	AE004091.2	pmr phosphoethanolamine transferase	peptide	target alteration
ARO:3003583	AEX49906.1	basS	Pseudomonas aeruginosa	JQ340365	pmr phosphoethanolamine transferase	peptide	target alteration
ARO:3002878	AAA22562.1	BcII	Bacillus cereus	M19530	Bc beta-lactamase	cephalosporin;penam	inactivation
ARO:3003801	ALV80601.1	bcr-1	Pseudomonas aeruginosa	CP012901.1	major facilitator superfamily (MFS) efflux pump	macrolide ;fluoroquinolone ;lincosamide ;fosfomycin;cephalosporin;glycylcycline;bicyclomycin;penam;nucleoside ;tetracycline ;peptide ;acridine dye;oxazolidinone ;rifamycin ;diaminopyrimidine ;phenicol ;isoniazid;benzalkonium chloride;rhodamine;antibacterial free fatty acids;nitroimidazole	efflux
ARO:3002987	AAA99504.1	bcrA	Bacillus licheniformis	L20573	ATP-binding cassette (ABC) efflux pump	macrolide ;fluoroquinolone ;cephalosporin;penam;tetracycline ;peptide ;acridine dye;rifamycin ;pleuromutilin ;nitroimidazole	efflux
ARO:3002988	AAA99505.1	bcrB	Bacillus licheniformis	L20573	ATP-binding cassette (ABC) efflux pump	macrolide ;fluoroquinolone ;cephalosporin;penam;tetracycline ;peptide ;acridine dye;rifamycin ;pleuromutilin ;nitroimidazole	efflux
ARO:3003250	AAA99503.1	bcrC	Bacillus licheniformis	L20573	undecaprenyl pyrophosphate related proteins	peptide	target alteration
ARO:3002385	AAZ04368.1	BEL-1	Pseudomonas aeruginosa	DQ089809	BEL beta-lactamase	monobactam;cephalosporin;penam	inactivation
ARO:3002386	ACV69996.1	BEL-2	Pseudomonas aeruginosa	FJ666063	BEL beta-lactamase	monobactam;cephalosporin;penam	inactivation
ARO:3002387	ACT09140.1	BEL-3	Pseudomonas aeruginosa	GQ202694	BEL beta-lactamase	monobactam;cephalosporin;penam	inactivation
ARO:3003730	ADP36409.1	Bifidobacteria intrinsic ileS conferring resistance to mupirocin	Bifidobacterium bifidum PRL2010	CP001840.1	resistant isoleucyl-tRNA synthetase (ileS)	mupirocin	target alteration
ARO:3004480	A1A317	Bifidobacterium adolescentis rpoB conferring resistance to rifampicin	Bifidobacterium adolescentis ATCC 15703	AP009256	rifamycin-resistant beta-subunit of RNA polymerase (rpoB)	peptide ;rifamycin	target alteration; target replacement
ARO:3000856	AND91341.1	BJP-1 beta-lactamase	Bradyrhizobium diazoefficiens USDA 110	CP011360.1	BJP beta-lactamase	carbapenem	inactivation
ARO:3000090	AAR20595.1	BLA1	Bacillus anthracis	AY453161	class A Bacillus anthracis Bla beta-lactamase	penam	inactivation
ARO:3004189	AAR20596.1	Bla2	Bacillus anthracis	AY453162	subclass B1 Bacillus anthracis Bla beta-lactamase	carbapenem;cephalosporin;penam	inactivation
ARO:3003562	AAA19882.1	blaF	Mycolicibacterium fortuitum	L25634	blaF family beta-lactamase	penam	inactivation
ARO:3000160	ABU39978.1	blaI	Bacillus clausii	EF540343.1	blaZ beta-lactamase	penam	inactivation
ARO:3000217	ABU39979.1	blaR1	Bacillus clausii	EF540343.1	blaZ beta-lactamase	penam	inactivation
ARO:3003006	AAC36944.1	blt	Bacillus subtilis subsp. subtilis str. 168	L32599	major facilitator superfamily (MFS) efflux pump	macrolide ;fluoroquinolone ;lincosamide ;fosfomycin;cephalosporin;glycylcycline;bicyclomycin;penam;nucleoside ;tetracycline ;peptide ;acridine dye;oxazolidinone ;rifamycin ;diaminopyrimidine ;phenicol ;isoniazid;benzalkonium chloride;rhodamine;antibacterial free fatty acids;nitroimidazole	efflux
ARO:3003007	AAA22277.1	bmr	Bacillus subtilis	M33768	major facilitator superfamily (MFS) efflux pump	macrolide ;fluoroquinolone ;lincosamide ;fosfomycin;cephalosporin;glycylcycline;bicyclomycin;penam;nucleoside ;tetracycline ;peptide ;acridine dye;oxazolidinone ;rifamycin ;diaminopyrimidine ;phenicol ;isoniazid;benzalkonium chloride;rhodamine;antibacterial free fatty acids;nitroimidazole	efflux
ARO:3003777	AAC66824.2	Borreliella burgdorferi murA with mutation conferring resistance to fosfomycin	Borreliella burgdorferi B31	AE000783.1	murA transferase	fosfomycin	target alteration
ARO:3003772	Q8FW76	Brucella suis mprF	Brucella suis	AE014292	defensin resistant mprF	peptide	target alteration
ARO:3004123	AAP82271	Burkholderia pseudomallei Omp38	Burkholderia pseudomallei	AY312416	General Bacterial Porin with reduced permeability to beta-lactams	monobactam;carbapenem;cephalosporin;cephamycin;penam;penem	reduced permeability to
ARO:3004294	AAN17791.1	BUT-1	Buttiauxella agrestis	AF440406.1	BUT beta-lactamase	cephalosporin	inactivation
ARO:3004559	AVX51087.1	CAM-1	Pseudomonas aeruginosa	MG430339.1	CAM beta-lactamase	carbapenem;cephalosporin;cephamycin;penam	inactivation
ARO:3004454	AAA23018.1	Campylobacter coli chloramphenicol acetyltransferase	Campylobacter coli	M35190.1	chloramphenicol acetyltransferase (CAT)	phenicol	inactivation
ARO:3003789	CAL35145.1	Campylobacter jejuni gyrA conferring resistance to fluoroquinolones	Campylobacter jejuni subsp. jejuni NCTC 11168 = ATCC 700819	AL111168.1	fluoroquinolone resistant gyrA	fluoroquinolone ;nybomycin	target alteration
ARO:3003931	EEK14408.1	Capnocytophaga gingivalis gyrA conferring resistance to fluoroquinolones	Capnocytophaga gingivalis ATCC 33624	ACLQ01000019.1	fluoroquinolone resistant gyrA	fluoroquinolone ;nybomycin	target alteration
ARO:3002817	AAC32027.1	carA	Streptomyces thermotolerans	M80346	ABC-F ATP-binding cassette ribosomal protection protein	macrolide ;lincosamide ;streptogramin ;tetracycline ;oxazolidinone ;phenicol ;pleuromutilin	target protection
ARO:3002240	AAK96394.1	CARB-1	Pseudomonas aeruginosa	AF313471	CARB beta-lactamase	penam	inactivation
ARO:3002243	AAC09012.1	CARB-4	Pseudomonas aeruginosa	U14749	CARB beta-lactamase	penam	inactivation
ARO:3002246	AAM74565.1	CARB-7	Vibrio cholerae non-O1/non-O139	AF409092	CARB beta-lactamase	penam	inactivation
ARO:3002248	AAP22374.1	CARB-9	Vibrio cholerae non-O1/non-O139	AY248038	CARB beta-lactamase	penam	inactivation
ARO:3003808	AKL79742.1	CarO	Acinetobacter baumannii	KP658477.1	CarO porin	carbapenem	reduced permeability to ;resistance by absence
ARO:3004657	AAA25655.1	catA4	Proteus mirabilis	M11587.1	chloramphenicol acetyltransferase (CAT)	phenicol	inactivation
ARO:3003110	CAI47810.1	catB10	Pseudomonas aeruginosa	AJ878850	chloramphenicol acetyltransferase (CAT)	phenicol	inactivation
ARO:3004660	AID93387.1	catB11	Klebsiella oxytoca KONIH1	CP008790.1	chloramphenicol acetyltransferase (CAT)	phenicol	inactivation
ARO:3002675	AAP15294.1	catB2	Pasteurella multocida	AY232670.1	chloramphenicol acetyltransferase (CAT)	phenicol	inactivation
ARO:3002676	AFQ93498.1	catB3	Enterobacter cloacae	JX101693.1	chloramphenicol acetyltransferase (CAT)	phenicol	inactivation
ARO:3002680	AAM92461.1	catB8	Salmonella enterica subsp. enterica serovar Typhi	AY123251.1	chloramphenicol acetyltransferase (CAT)	phenicol	inactivation
ARO:3002681	AAL68645.1	catB9	Vibrio cholerae	AF462019	chloramphenicol acetyltransferase (CAT)	phenicol	inactivation
ARO:3002683	CAA23899.1	catI	Escherichia coli	V00622	chloramphenicol acetyltransferase (CAT)	phenicol	inactivation
ARO:3002684	CAA37806.1	catII	Haemophilus influenzae	X53797	chloramphenicol acetyltransferase (CAT)	phenicol	inactivation
ARO:3004656	CAA37805.1	catII from Escherichia coli K-12	Escherichia coli K-12	X53796.1	chloramphenicol acetyltransferase (CAT)	phenicol	inactivation
ARO:3002685	CAA30695.1	catIII	Plasmid R387	X07848	chloramphenicol acetyltransferase (CAT)	phenicol	inactivation
ARO:3002687	AAA23215.1	catQ	Clostridium perfringens	M55620	chloramphenicol acetyltransferase (CAT)	phenicol	inactivation
ARO:3003983	APB03217.1	CatU	Paenibacillus sp. LC231	KX531047.1	chloramphenicol acetyltransferase (CAT)	phenicol	inactivation
ARO:3004357	ATL63235.1	catV	Brevibacillus brevis Vm4	KY753886.1	chloramphenicol acetyltransferase (CAT)	phenicol	inactivation
ARO:3000855	CAC87665.1	CAU-1 beta-lactamase	Caulobacter vibrioides	AJ308331	CAU beta-lactamase	carbapenem;penam	inactivation
ARO:3002999	ACT97415.1	CblA-1	mixed culture bacterium AX_gF3SD01_15	GQ343019	CblA beta-lactamase	cephalosporin	inactivation
ARO:3000578	AAA22904.1	CcrA beta-lactamase	Bacteroides fragilis	M63556	CcrA beta-lactamase	carbapenem	inactivation
ARO:3003835	CAE00499.1	cdeA	Clostridioides difficile	AJ574887.1	multidrug and toxic compound extrusion (MATE) transporter	fluoroquinolone ;glycylcycline;tetracycline ;acridine dye	efflux
ARO:3003009	AAB58160.1	ceoA	Burkholderia cepacia	U97042	resistance-nodulation-cell division (RND) efflux pump	macrolide ;fluoroquinolone ;monobactam;aminoglycoside ;carbapenem;glycylcycline;penam;tetracycline ;acridine dye;aminocoumarin ;diaminopyrimidine ;phenicol ;triclosan;antibacterial free fatty acids	efflux
ARO:3003010	AAB58161.1	ceoB	Burkholderia cepacia	U97042	resistance-nodulation-cell division (RND) efflux pump	macrolide ;fluoroquinolone ;monobactam;aminoglycoside ;carbapenem;glycylcycline;penam;tetracycline ;acridine dye;aminocoumarin ;diaminopyrimidine ;phenicol ;triclosan;antibacterial free fatty acids	efflux
ARO:3003559	AAA21532.1	cepA beta-lactamase	Bacteroides fragilis	U05883	cepA beta-lactamase	cephalosporin	inactivation
ARO:3003093	AAM63403.1	CEPH-A3	Aeromonas veronii bv. sobria	AY112998	CphA beta-lactamase	carbapenem	inactivation
ARO:3003553	CAA56561.1	CepS beta-lactamase	Aeromonas sobria	X80277	CepS beta-lactamase	cephalosporin	inactivation
ARO:3001856	BAC76072.1	CFE-1	Escherichia coli	AB107899	CMY beta-lactamase	cephamycin	inactivation
ARO:3004649	CDF47262.1	cfr(B)	Clostridioides difficile	HG002396.1	Cfr 23S ribosomal RNA methyltransferase	macrolide ;lincosamide ;streptogramin ;oxazolidinone ;phenicol	target alteration
ARO:3003441	CAL64019.1	cfrA	Staphylococcus warneri	AM408573	Cfr 23S ribosomal RNA methyltransferase	macrolide ;lincosamide ;streptogramin ;oxazolidinone ;phenicol ;pleuromutilin	target alteration
ARO:3004146	CAL84423.1	cfrC	Clostridium botulinum A str. ATCC 3502	AM412317.1	Cfr 23S ribosomal RNA methyltransferase	macrolide ;lincosamide ;streptogramin ;oxazolidinone ;phenicol	target alteration
ARO:3003002	AAD23513.1	CfxA2	Prevotella intermedia	AF118110.1	CfxA beta-lactamase	cephamycin	inactivation
ARO:3003097	ACT97371.1	CfxA6	uncultured organism	GQ342996	CfxA beta-lactamase	cephamycin	inactivation
ARO:3000841	ABS29619.1	CGB-1 beta-lactamase	Chryseobacterium gleum	EF672680	CGB beta-lactamase	carbapenem;cephalosporin;penam	inactivation
ARO:3003785	AAN28945	Chlamydia trachomatis intrinsic murA conferring resistance to fosfomycin	Chlamydia trachomatis	AY152390	murA transferase	fosfomycin	target alteration
ARO:3001302	AAS79458.1	chrB	Streptomyces bikiniensis	AY509120	non-erm 23S ribosomal RNA methyltransferase (G748)	macrolide ;lincosamide	target alteration
ARO:3003907	ACX65640.1	cipA	Paenibacillus sp. Y412MC10	CP001793.1	Cfr 23S ribosomal RNA methyltransferase	macrolide ;lincosamide ;streptogramin ;oxazolidinone ;phenicol ;pleuromutilin	target alteration
ARO:3002814	AGZ55247.1	clbA	Bacillus amyloliquefaciens CC178	CP006845.1	Cfr 23S ribosomal RNA methyltransferase	macrolide ;lincosamide ;streptogramin ;oxazolidinone ;phenicol ;pleuromutilin	target alteration
ARO:3002815	BAH45481.1	clbB	Brevibacillus brevis NBRC 100599	AP008955.1	Cfr 23S ribosomal RNA methyltransferase	macrolide ;lincosamide ;streptogramin ;oxazolidinone ;phenicol ;pleuromutilin	target alteration
ARO:3002816	BAD63613.1	clbC	Bacillus clausii KSM-K16	AP006627.1	Cfr 23S ribosomal RNA methyltransferase	macrolide ;lincosamide ;streptogramin ;oxazolidinone ;phenicol ;pleuromutilin	target alteration
ARO:3004599	AIX48090.1	clcD	Clostridioides difficile	KM359438.1	Cfr 23S ribosomal RNA methyltransferase	macrolide ;lincosamide ;streptogramin ;oxazolidinone ;phenicol ;pleuromutilin	target alteration
ARO:3003357	AXU66539.1	Clostridioides difficile EF-Tu mutants conferring resistance to elfamycin	Clostridioides difficile	CP012325.1	elfamycin resistant EF-Tu	elfamycin	target alteration
ARO:3003995	CAJ66820.1	Clostridioides difficile gyrA conferring resistance to fluoroquinolones	Clostridioides difficile 630	AM180355.1	fluoroquinolone resistant gyrA	fluoroquinolone ;nybomycin	target alteration
ARO:3004562	ADK13120.1	Clostridioides difficile gyrB conferring resistance to fluoroquinolone	Clostridium ljungdahlii DSM 13528	CP001666.1	fluoroquinolone resistant gyrB	fluoroquinolone ;aminocoumarin	target alteration
ARO:3004561	AAK80188.1	Clostridioides difficile murG with mutation conferring resistance to vancomycin	Clostridium acetobutylicum ATCC 824	AE001437.1	murG transferase	glycopeptide	target alteration
ARO:3004563	ADK17136.1	Clostridioides difficile rpoB with mutation conferring resistance to rifampicin	Clostridium ljungdahlii DSM 13528	CP001666.1	rifamycin-resistant beta-subunit of RNA polymerase (rpoB)	peptide ;rifamycin	target alteration; target replacement
ARO:3004681	AJP09758.1	Clostridioides difficile rpoC with mutation conferring resistance to vancomycin	Clostridioides difficile 630	CP010905.2	vancomycin-resistant beta prime subunit of RNA polymerase (rpoC)	glycopeptide	target alteration
ARO:3003773	ABG86067.1	Clostridium perfringens mprF	Clostridium perfringens SM101	CP000312.1	defensin resistant mprF	peptide	target alteration
ARO:3000783	ABS43901.1	cmeA	Campylobacter jejuni subsp. doylei 269.97	CP000768	resistance-nodulation-cell division (RND) efflux pump	macrolide ;fluoroquinolone ;monobactam;aminoglycoside ;carbapenem;cephalosporin;glycylcycline;penam;tetracycline ;acridine dye;aminocoumarin ;diaminopyrimidine ;phenicol ;fusidic acid;triclosan;antibacterial free fatty acids	efflux
ARO:3000784	ABS43151.1	cmeB	Campylobacter jejuni subsp. doylei 269.97	CP000768	resistance-nodulation-cell division (RND) efflux pump	macrolide ;fluoroquinolone ;monobactam;aminoglycoside ;carbapenem;cephalosporin;glycylcycline;penam;tetracycline ;acridine dye;aminocoumarin ;diaminopyrimidine ;phenicol ;fusidic acid;triclosan;antibacterial free fatty acids	efflux
ARO:3000785	BAO79432.1	cmeC	Campylobacter jejuni subsp. jejuni	AB894099	resistance-nodulation-cell division (RND) efflux pump	macrolide ;fluoroquinolone ;monobactam;aminoglycoside ;carbapenem;cephalosporin;glycylcycline;penam;tetracycline ;acridine dye;aminocoumarin ;diaminopyrimidine ;phenicol ;fusidic acid;triclosan;antibacterial free fatty acids	efflux
ARO:3000526	CAL34518.1	cmeR	Campylobacter jejuni subsp. jejuni NCTC 11168 = ATCC 700819	AL111168.1	resistance-nodulation-cell division (RND) efflux pump	macrolide ;fluoroquinolone ;monobactam;aminoglycoside ;carbapenem;cephalosporin;glycylcycline;penam;tetracycline ;acridine dye;aminocoumarin ;diaminopyrimidine ;phenicol ;fusidic acid;triclosan;antibacterial free fatty acids	efflux
ARO:3002690	CAA42594.1	cml	Streptomyces lividans 1326	X59968	major facilitator superfamily (MFS) efflux pump	macrolide ;fluoroquinolone ;lincosamide ;fosfomycin;cephalosporin;glycylcycline;bicyclomycin;penam;nucleoside ;tetracycline ;peptide ;acridine dye;oxazolidinone ;rifamycin ;diaminopyrimidine ;phenicol ;isoniazid;benzalkonium chloride;rhodamine;antibacterial free fatty acids;nitroimidazole	efflux
ARO:3002693	AAA26057.1	cmlA1	Pseudomonas aeruginosa Partial	M64556.1	major facilitator superfamily (MFS) efflux pump	macrolide ;fluoroquinolone ;lincosamide ;fosfomycin;cephalosporin;glycylcycline;bicyclomycin;penam;nucleoside ;tetracycline ;peptide ;acridine dye;oxazolidinone ;rifamycin ;diaminopyrimidine ;phenicol ;isoniazid;benzalkonium chloride;rhodamine;antibacterial free fatty acids;nitroimidazole	efflux
ARO:3002694	AAF27726.1	cmlA4	Klebsiella pneumoniae	AF156486	major facilitator superfamily (MFS) efflux pump	macrolide ;fluoroquinolone ;lincosamide ;fosfomycin;cephalosporin;glycylcycline;bicyclomycin;penam;nucleoside ;tetracycline ;peptide ;acridine dye;oxazolidinone ;rifamycin ;diaminopyrimidine ;phenicol ;isoniazid;benzalkonium chloride;rhodamine;antibacterial free fatty acids;nitroimidazole	efflux
ARO:3002695	AAM77075.1	cmlA5	uncultured bacterium	AY115475	major facilitator superfamily (MFS) efflux pump	macrolide ;fluoroquinolone ;lincosamide ;fosfomycin;cephalosporin;glycylcycline;bicyclomycin;penam;nucleoside ;tetracycline ;peptide ;acridine dye;oxazolidinone ;rifamycin ;diaminopyrimidine ;phenicol ;isoniazid;benzalkonium chloride;rhodamine;antibacterial free fatty acids;nitroimidazole	efflux
ARO:3002696	AAK52606.1	cmlA6	Pseudomonas aeruginosa	AF294653	major facilitator superfamily (MFS) efflux pump	macrolide ;fluoroquinolone ;lincosamide ;fosfomycin;cephalosporin;glycylcycline;bicyclomycin;penam;nucleoside ;tetracycline ;peptide ;acridine dye;oxazolidinone ;rifamycin ;diaminopyrimidine ;phenicol ;isoniazid;benzalkonium chloride;rhodamine;antibacterial free fatty acids;nitroimidazole	efflux
ARO:3004665	ABW91179.1	cmlA8	Pseudomonas aeruginosa	EU182575.1	major facilitator superfamily (MFS) efflux pump	macrolide ;fluoroquinolone ;lincosamide ;fosfomycin;cephalosporin;glycylcycline;bicyclomycin;penam;nucleoside ;tetracycline ;peptide ;acridine dye;oxazolidinone ;rifamycin ;diaminopyrimidine ;phenicol ;isoniazid;benzalkonium chloride;rhodamine;antibacterial free fatty acids;nitroimidazole	efflux
ARO:3002698	AAD22144.1	cmlB	Klebsiella aerogenes	AF034958	major facilitator superfamily (MFS) efflux pump	macrolide ;fluoroquinolone ;lincosamide ;fosfomycin;cephalosporin;glycylcycline;bicyclomycin;penam;nucleoside ;tetracycline ;peptide ;acridine dye;oxazolidinone ;rifamycin ;diaminopyrimidine ;phenicol ;isoniazid;benzalkonium chloride;rhodamine;antibacterial free fatty acids;nitroimidazole	efflux
ARO:3002699	CAL30186.1	cmlB1	Bordetella bronchiseptica	AM296481	major facilitator superfamily (MFS) efflux pump	macrolide ;fluoroquinolone ;lincosamide ;fosfomycin;cephalosporin;glycylcycline;bicyclomycin;penam;nucleoside ;tetracycline ;peptide ;acridine dye;oxazolidinone ;rifamycin ;diaminopyrimidine ;phenicol ;isoniazid;benzalkonium chloride;rhodamine;antibacterial free fatty acids;nitroimidazole	efflux
ARO:3002700	AAB36568.1	cmlv	Streptomyces venezuelae ATCC 10712	U09991	chloramphenicol phosphotransferase	phenicol	inactivation
ARO:3002702	AAC45805.1	cmrA	Rhodococcus rhodochrous	AF015087	major facilitator superfamily (MFS) efflux pump	macrolide ;fluoroquinolone ;lincosamide ;fosfomycin;cephalosporin;glycylcycline;bicyclomycin;penam;nucleoside ;tetracycline ;peptide ;acridine dye;oxazolidinone ;rifamycin ;diaminopyrimidine ;phenicol ;isoniazid;benzalkonium chloride;rhodamine;antibacterial free fatty acids;nitroimidazole	efflux
ARO:3002703	AAG03380.1	cmx	Corynebacterium striatum	AF024666	major facilitator superfamily (MFS) efflux pump	macrolide ;fluoroquinolone ;lincosamide ;fosfomycin;cephalosporin;glycylcycline;bicyclomycin;penam;nucleoside ;tetracycline ;peptide ;acridine dye;oxazolidinone ;rifamycin ;diaminopyrimidine ;phenicol ;isoniazid;benzalkonium chloride;rhodamine;antibacterial free fatty acids;nitroimidazole	efflux
ARO:3002012	CAA63264.1	CMY-1	Klebsiella pneumoniae	X92508	CMY beta-lactamase	cephamycin	inactivation
ARO:3002112	AHA80101.1	CMY-100	Citrobacter freundii	KF526113	CMY beta-lactamase	cephamycin	inactivation
ARO:3002115	AHA80104.1	CMY-103	Citrobacter freundii	KF526116	CMY beta-lactamase	cephamycin	inactivation
ARO:3002116	AGR82311.1	CMY-104	Citrobacter sp. OTESBL0707	KF150216	CMY beta-lactamase	cephamycin	inactivation
ARO:3002124	AIT76089.1	CMY-113	Citrobacter freundii	KM087836	CMY beta-lactamase	cephamycin	inactivation
ARO:3002125	AIT76099.1	CMY-114	Citrobacter freundii	KM087846	CMY beta-lactamase	cephamycin	inactivation
ARO:3002126	AIT76092.1	CMY-115	Citrobacter freundii	KM087839	CMY beta-lactamase	cephamycin	inactivation
ARO:3002024	AAQ16660.2	CMY-13	Escherichia coli	AY339625	CMY beta-lactamase	cephamycin	inactivation
ARO:3002034	ABF06441.1	CMY-23	Salmonella enterica subsp. enterica serovar Senftenberg	DQ463751	CMY beta-lactamase	cephamycin	inactivation
ARO:3002037	BAF56185.1	CMY-26	Klebsiella oxytoca	AB300358	CMY beta-lactamase	cephamycin	inactivation
ARO:3002039	ABQ51091.1	CMY-28	Escherichia coli	EF561644	CMY beta-lactamase	cephamycin	inactivation
ARO:3002040	ABS12248.1	CMY-29	Escherichia coli	EF685371	CMY beta-lactamase	cephamycin	inactivation
ARO:3002049	CAP60699.1	CMY-38	Proteus mirabilis	AM931008	CMY beta-lactamase	cephamycin	inactivation
ARO:3002056	CBB16411.1	CMY-45	Proteus mirabilis	FN546177	CMY beta-lactamase	cephamycin	inactivation
ARO:3002057	CBH19182.1	CMY-46	Escherichia coli	FN556186	CMY beta-lactamase	cephamycin	inactivation
ARO:3002073	AEM97672.1	CMY-60	Escherichia coli	JF460794	CMY beta-lactamase	cephamycin	inactivation
ARO:3002079	AEZ49849.1	CMY-66	Citrobacter freundii	JN714478	CMY beta-lactamase	cephamycin	inactivation
ARO:3002080	AFK08541.1	CMY-67	Citrobacter freundii	JQ711185	CMY beta-lactamase	cephamycin	inactivation
ARO:3002081	AEZ49855.1	CMY-68	Citrobacter freundii	JN714480	CMY beta-lactamase	cephamycin	inactivation
ARO:3002085	AFU25641.1	CMY-72	Citrobacter freundii	JX440352	CMY beta-lactamase	cephamycin	inactivation
ARO:3002086	ACU00152.1	CMY-73	Citrobacter freundii	GQ351345	CMY beta-lactamase	cephamycin	inactivation
ARO:3002087	AFU25632.1	CMY-74	Citrobacter braakii	JX440349	CMY beta-lactamase	cephamycin	inactivation
ARO:3002019	AAD50818.2	CMY-8	Klebsiella pneumoniae	AF167990	CMY beta-lactamase	cephamycin	inactivation
ARO:3002093	AFK73449.1	CMY-80	Citrobacter freundii	JQ733577	CMY beta-lactamase	cephamycin	inactivation
ARO:3002094	AFK73452.1	CMY-81	Citrobacter freundii	JQ733578	CMY beta-lactamase	cephamycin	inactivation
ARO:3002095	AHL39324.1	CMY-82	Citrobacter freundii	KJ207203	CMY beta-lactamase	cephamycin	inactivation
ARO:3002096	AFU25638.1	CMY-83	Citrobacter braakii	JX440351	CMY beta-lactamase	cephamycin	inactivation
ARO:3002098	AHL39322.1	CMY-85	Citrobacter freundii	KJ207202	CMY beta-lactamase	cephamycin	inactivation
ARO:3002106	AHM76768.1	CMY-93	Citrobacter freundii	KF992025	CMY beta-lactamase	cephamycin	inactivation
ARO:3002111	AGH70380.1	CMY-98	Citrobacter freundii	KC603538	CMY beta-lactamase	cephamycin	inactivation
ARO:3003994	APB03224.1	cpaA	Paenibacillus sp. LC231	KX531054.1	cpa acetyltransferase	aminoglycoside	inactivation
ARO:3003099	AAB03413.1	cphA2	Aeromonas hydrophila	U60294	CphA beta-lactamase	carbapenem	inactivation
ARO:3003100	AAP69912.1	cphA4	Aeromonas allosaccharophila	AY227050	CphA beta-lactamase	carbapenem	inactivation
ARO:3003102	AAP69914.1	cphA6	Aeromonas veronii bv. veronii	AY227052	CphA beta-lactamase	carbapenem	inactivation
ARO:3003103	CAA40386.1	cphA7	Aeromonas hydrophila	X57102	CphA beta-lactamase	carbapenem	inactivation
ARO:3003104	AAP97129.1	cphA8	Aeromonas sobria	AY261375	CphA beta-lactamase	carbapenem	inactivation
ARO:3003716	AJP77054	CPS-1	Chryseobacterium sp. Stok-1	KP109675	CPS beta-lactamase	carbapenem	inactivation
ARO:3000830	BAB38260.1	cpxA	Escherichia coli O157:H7 str. Sakai	BA000007.3	resistance-nodulation-cell division (RND) efflux pump	macrolide ;fluoroquinolone ;monobactam;aminoglycoside ;carbapenem;glycylcycline;penam;tetracycline ;acridine dye;aminocoumarin ;diaminopyrimidine ;phenicol ;triclosan;antibacterial free fatty acids	efflux
ARO:3000518	BAE77933.1	CRP	Escherichia coli str. K-12 substr. W3110	AP009048.1	resistance-nodulation-cell division (RND) efflux pump	macrolide ;fluoroquinolone ;monobactam;aminoglycoside ;carbapenem;glycylcycline;penam;tetracycline ;acridine dye;aminocoumarin ;diaminopyrimidine ;phenicol ;triclosan;antibacterial free fatty acids	efflux
ARO:3004468	AEQ93536.1	CrpP	Pseudomonas aeruginosa	HM560971.1	ciprofloxacin phosphotransferase	fluoroquinolone	inactivation
ARO:3001973	AEM44653.1	CTX-M-113	Shigella sp. SH284	JF274247	CTX-M beta-lactamase	cephalosporin	inactivation
ARO:3001981	AFA51700.1	CTX-M-122	Escherichia coli	JN790863	CTX-M beta-lactamase	cephalosporin	inactivation
ARO:3001982	AFA51701.1	CTX-M-123	Escherichia coli	JN790864	CTX-M beta-lactamase	cephalosporin	inactivation
ARO:3001985	BAL72196.1	CTX-M-126	Escherichia coli	AB703103	CTX-M beta-lactamase	cephalosporin	inactivation
ARO:3002008	BAP34782.1	CTX-M-151	Salmonella enterica	AB916359	CTX-M beta-lactamase	cephalosporin	inactivation
ARO:3001899	AAT70415.1	CTX-M-37	Enterobacter cloacae	AY649755	CTX-M beta-lactamase	cephalosporin	inactivation
ARO:3001907	BAA28282.1	CTX-M-45	Escherichia coli	D89862	CTX-M beta-lactamase	cephalosporin	inactivation
ARO:3001925	BAF63422.1	CTX-M-64	Shigella sonnei	AB284167	CTX-M beta-lactamase	cephalosporin	inactivation
ARO:3001943	ABB59946.1	CTX-M-82	Escherichia coli	DQ256091	CTX-M beta-lactamase	cephalosporin	inactivation
ARO:3001947	ACB41777.1	CTX-M-87	Escherichia coli	EU545409	CTX-M beta-lactamase	cephalosporin	inactivation
ARO:3003974	AER05434.1	Cutibacterium acnes gyrA conferring resistance to fluoroquinolones	Cutibacterium acnes subsp. defendens ATCC 11828	CP003084.1	fluoroquinolone resistant gyrA	fluoroquinolone ;nybomycin	target alteration
ARO:3003970	AAN62561.1	D-Ala-D-Ala ligase	Enterococcus gallinarum	AY168442.1	van ligase	glycopeptide	target alteration
ARO:3001205	AGH88989.1	determinant of bleomycin resistance	Acinetobacter baumannii	KC503911.1	Bleomycin resistant protein	glycopeptide	inactivation
ARO:3002854	AAP74961.2	dfrA1	Klebsiella oxytoca	KJ541681.1	trimethoprim resistant dihydrofolate reductase dfr	diaminopyrimidine	target replacement
ARO:3002858	ADG84870.1	dfrA12	Klebsiella pneumoniae	GU585907.1	trimethoprim resistant dihydrofolate reductase dfr	diaminopyrimidine	target replacement
ARO:3002859	ACI32877.1	dfrA14	Escherichia coli	EU780012	trimethoprim resistant dihydrofolate reductase dfr	diaminopyrimidine	target replacement
ARO:3003013	AHB39758.1	dfrA15	Escherichia coli	KF534911	trimethoprim resistant dihydrofolate reductase dfr	diaminopyrimidine	target replacement
ARO:3004568	AAK64581.1	dfrA18	Vibrio cholerae MO10	AY034138.1	trimethoprim resistant dihydrofolate reductase dfr	diaminopyrimidine	target replacement
ARO:3003015	CAC81324.1	dfrA19	Salmonella enterica subsp. enterica serovar Typhimurium	AJ310778	trimethoprim resistant dihydrofolate reductase dfr	diaminopyrimidine	target replacement
ARO:3003016	CAE53424.1	dfrA20	Pasteurella multocida	AJ605332	trimethoprim resistant dihydrofolate reductase dfr	diaminopyrimidine	target replacement
ARO:3003017	CAP69659.1	dfrA21	Salmonella enterica subsp. enterica serovar Bredeney	AM932669	trimethoprim resistant dihydrofolate reductase dfr	diaminopyrimidine	target replacement
ARO:3003018	CAX16467.1	dfrA22	uncultured bacterium	FM957884	trimethoprim resistant dihydrofolate reductase dfr	diaminopyrimidine	target replacement
ARO:3003019	CAG34233.2	dfrA23	Salmonella enterica subsp. enterica serovar Typhimurium	AJ746361	trimethoprim resistant dihydrofolate reductase dfr	diaminopyrimidine	target replacement
ARO:3002856	CAI99385.1	dfrA24	Escherichia coli	AJ972619	trimethoprim resistant dihydrofolate reductase dfr	diaminopyrimidine	target replacement
ARO:3002857	CAL48457.1	dfrA26	Escherichia coli	AM403715	trimethoprim resistant dihydrofolate reductase dfr	diaminopyrimidine	target replacement
ARO:3003105	AAA25550.1	dfrA3	Plasmid pAZ1	J03306	trimethoprim resistant dihydrofolate reductase dfr	diaminopyrimidine	target replacement
ARO:3004552	CAQ53849.2	dfrA30	Klebsiella sp. MB45	AM997279.2	trimethoprim resistant dihydrofolate reductase dfr	diaminopyrimidine	target replacement
ARO:3004555	ACZ52983.1	dfrA32	Salmonella enterica	GU067642.1	trimethoprim resistant dihydrofolate reductase dfr	diaminopyrimidine	target replacement
ARO:3004547	ACY06082.1	dfrA6	Vibrio cholerae	FJ905898.1	trimethoprim resistant dihydrofolate reductase dfr	diaminopyrimidine	target replacement
ARO:3002863	AHV80711.1	dfrA8	Salmonella enterica subsp. enterica serovar Typhimurium	KJ174469	trimethoprim resistant dihydrofolate reductase dfr	diaminopyrimidine	target replacement
ARO:3004548	CAA40897.1	dfrA9	Escherichia coli	X57730.1	trimethoprim resistant dihydrofolate reductase dfr	diaminopyrimidine	target replacement
ARO:3002864	AAY33960.1	dfrB1	Escherichia coli	AY970968.1	trimethoprim resistant dihydrofolate reductase dfr	diaminopyrimidine	target replacement
ARO:3003021	ABI20482.1	dfrB2	uncultured bacterium	DQ839391.1	trimethoprim resistant dihydrofolate reductase dfr	diaminopyrimidine	target replacement
ARO:3003022	ACR57831.1	dfrB3	Klebsiella oxytoca	GQ150744	trimethoprim resistant dihydrofolate reductase dfr	diaminopyrimidine	target replacement
ARO:3004498	AKF12264.1	dfrB4	Escherichia coli	KP314737.1	trimethoprim resistant dihydrofolate reductase dfr	diaminopyrimidine	target replacement
ARO:3004549	AAX46054.1	dfrB5	Pseudomonas aeruginosa Partial	AY943084.1	trimethoprim resistant dihydrofolate reductase dfr	diaminopyrimidine	target replacement
ARO:3003023	ADO00942.1	dfrB6	uncultured bacterium	GU060319	trimethoprim resistant dihydrofolate reductase dfr	diaminopyrimidine	target replacement
ARO:3004556	ADB54781.1	dfrB7	Aeromonas hydrophila Partial	GU295656.1	trimethoprim resistant dihydrofolate reductase dfr	diaminopyrimidine	target replacement
ARO:3002865	AAO04716.1	dfrC	Staphylococcus epidermidis ATCC 12228	AE015929.1	trimethoprim resistant dihydrofolate reductase dfr	diaminopyrimidine	target replacement
ARO:3002866	AAA85213.1	dfrD	Listeria monocytogenes	U43152	trimethoprim resistant dihydrofolate reductase dfr	diaminopyrimidine	target replacement
ARO:3002875	EOD99669.1	dfrE	Enterococcus faecalis EnGen0074	AIIS01000002.1	trimethoprim resistant dihydrofolate reductase dfr	diaminopyrimidine	target replacement
ARO:3002867	AAD01868.1	dfrF	Enterococcus faecalis	AF028812	trimethoprim resistant dihydrofolate reductase dfr	diaminopyrimidine	target replacement
ARO:3002868	BAE15963.1	dfrG	Staphylococcus aureus	AB205645	trimethoprim resistant dihydrofolate reductase dfr	diaminopyrimidine	target replacement
ARO:3004645	ABO40886.1	dfrI	Yersinia ruckeri	CP000602.1	trimethoprim resistant dihydrofolate reductase dfr	diaminopyrimidine	target replacement
ARO:3002869	CBL80435.1	dfrK	Staphylococcus aureus	FN812951	trimethoprim resistant dihydrofolate reductase dfr	diaminopyrimidine	target replacement
ARO:3002132	BAB43543.1	DHA-1	Staphylococcus aureus subsp. aureus N315	BA000018.3	DHA beta-lactamase	cephalosporin;cephamycin	inactivation
ARO:3002141	AJO16043.1	DHA-10	Morganella morganii	KP050490	DHA beta-lactamase	cephalosporin;cephamycin	inactivation
ARO:3002143	CDL68900.1	DHA-12	Proteus mirabilis	HG798963	DHA beta-lactamase	cephalosporin;cephamycin	inactivation
ARO:3002144	AIT76108.1	DHA-13	Morganella morganii	KM087855	DHA beta-lactamase	cephalosporin;cephamycin	inactivation
ARO:3002145	AIT76107.1	DHA-14	Morganella morganii	KM087854	DHA beta-lactamase	cephalosporin;cephamycin	inactivation
ARO:3002146	AIT76106.1	DHA-15	Klebsiella pneumoniae	KM087853	DHA beta-lactamase	cephalosporin;cephamycin	inactivation
ARO:3002147	AIT76105.1	DHA-16	Morganella morganii	KM087852	DHA beta-lactamase	cephalosporin;cephamycin	inactivation
ARO:3002150	AIT76102.1	DHA-19	Morganella morganii	KM087849	DHA beta-lactamase	cephalosporin;cephamycin	inactivation
ARO:3002133	AAG36927.1	DHA-2	Klebsiella pneumoniae	AF259520	DHA beta-lactamase	cephalosporin;cephamycin	inactivation
ARO:3002152	AIT76100.1	DHA-21	Morganella morganii	KM087847	DHA beta-lactamase	cephalosporin;cephamycin	inactivation
ARO:3002134	AAR87489.1	DHA-3	Klebsiella pneumoniae	AY494945	DHA beta-lactamase	cephalosporin;cephamycin	inactivation
ARO:3002138	AEL22919.1	DHA-5	Morganella morganii	JF273491	DHA beta-lactamase	cephalosporin;cephamycin	inactivation
ARO:3002135	ADT91161.1	DHA-6	Escherichia coli	HQ322612	DHA beta-lactamase	cephalosporin;cephamycin	inactivation
ARO:3002136	ADQ00385.1	DHA-7	Enterobacter cloacae	HQ456945	DHA beta-lactamase	cephalosporin;cephamycin	inactivation
ARO:3003761	AGQ48857.1	eatAv	Enterococcus faecium	KF010779.1	ABC-F ATP-binding cassette ribosomal protection protein	macrolide ;lincosamide ;streptogramin ;tetracycline ;oxazolidinone ;phenicol ;pleuromutilin	target protection
ARO:3000842	AAN32638.1	EBR-1 beta-lactamase	Empedobacter brevis	AF416700	EBR beta-lactamase	carbapenem;cephalosporin;penam	inactivation
ARO:3004063	AHH86051.1	EdeQ	Brevibacillus brevis	KC771276.1	Edeine acetyltransferase	peptide ;polyamine	inactivation
ARO:3003954	BAG75524.1	efmA	Enterococcus faecium	AB467372.1	major facilitator superfamily (MFS) efflux pump	macrolide ;fluoroquinolone ;lincosamide ;fosfomycin;cephalosporin;glycylcycline;bicyclomycin;penam;nucleoside ;tetracycline ;peptide ;acridine dye;oxazolidinone ;rifamycin ;diaminopyrimidine ;phenicol ;isoniazid;benzalkonium chloride;rhodamine;antibacterial free fatty acids;nitroimidazole	efflux
ARO:3003955	CCP45647.1	efpA	Mycobacterium tuberculosis H37Rv	AL123456.3	major facilitator superfamily (MFS) efflux pump	macrolide ;fluoroquinolone ;lincosamide ;fosfomycin;cephalosporin;glycylcycline;bicyclomycin;penam;nucleoside ;tetracycline ;peptide ;acridine dye;oxazolidinone ;rifamycin ;diaminopyrimidine ;phenicol ;isoniazid;benzalkonium chloride;rhodamine;antibacterial free fatty acids;nitroimidazole	efflux
ARO:3003948	CDO61513.1	efrA	Enterococcus faecium	HG970100.1	ATP-binding cassette (ABC) efflux pump	macrolide ;fluoroquinolone ;cephalosporin;penam;tetracycline ;peptide ;acridine dye;rifamycin ;pleuromutilin ;nitroimidazole	efflux
ARO:3003949	CDO61516.1	efrB	Enterococcus faecium	HG970103.1	ATP-binding cassette (ABC) efflux pump	macrolide ;fluoroquinolone ;cephalosporin;penam;tetracycline ;peptide ;acridine dye;rifamycin ;pleuromutilin ;nitroimidazole	efflux
ARO:3003551	BAC11911.1	emeA	Enterococcus faecalis ATCC 29212	AB091338	multidrug and toxic compound extrusion (MATE) transporter	fluoroquinolone ;glycylcycline;tetracycline ;acridine dye	efflux
ARO:3000027	BAA16547.1	emrA	Escherichia coli str. K-12 substr. W3110	AP009048	major facilitator superfamily (MFS) efflux pump	macrolide ;fluoroquinolone ;lincosamide ;fosfomycin;cephalosporin;glycylcycline;bicyclomycin;penam;nucleoside ;tetracycline ;peptide ;acridine dye;oxazolidinone ;rifamycin ;diaminopyrimidine ;phenicol ;isoniazid;benzalkonium chloride;rhodamine;antibacterial free fatty acids;nitroimidazole	efflux
ARO:3000074	AAC75733.1	emrB	Escherichia coli str. K-12 substr. MG1655	U00096	major facilitator superfamily (MFS) efflux pump	macrolide ;fluoroquinolone ;lincosamide ;fosfomycin;cephalosporin;glycylcycline;bicyclomycin;penam;nucleoside ;tetracycline ;peptide ;acridine dye;oxazolidinone ;rifamycin ;diaminopyrimidine ;phenicol ;isoniazid;benzalkonium chloride;rhodamine;antibacterial free fatty acids;nitroimidazole	efflux
ARO:3000206	BAA11236.1	emrK	Escherichia coli	D78168	major facilitator superfamily (MFS) efflux pump	macrolide ;fluoroquinolone ;lincosamide ;fosfomycin;cephalosporin;glycylcycline;bicyclomycin;penam;nucleoside ;tetracycline ;peptide ;acridine dye;oxazolidinone ;rifamycin ;diaminopyrimidine ;phenicol ;isoniazid;benzalkonium chloride;rhodamine;antibacterial free fatty acids;nitroimidazole	efflux
ARO:3000516	AAC75731.1	emrR	Escherichia coli str. K-12 substr. MG1655	U00096.3	major facilitator superfamily (MFS) efflux pump	macrolide ;fluoroquinolone ;lincosamide ;fosfomycin;cephalosporin;glycylcycline;bicyclomycin;penam;nucleoside ;tetracycline ;peptide ;acridine dye;oxazolidinone ;rifamycin ;diaminopyrimidine ;phenicol ;isoniazid;benzalkonium chloride;rhodamine;antibacterial free fatty acids;nitroimidazole	efflux
ARO:3000254	BAA11237.1	emrY	Escherichia coli	D78168	major facilitator superfamily (MFS) efflux pump	macrolide ;fluoroquinolone ;lincosamide ;fosfomycin;cephalosporin;glycylcycline;bicyclomycin;penam;nucleoside ;tetracycline ;peptide ;acridine dye;oxazolidinone ;rifamycin ;diaminopyrimidine ;phenicol ;isoniazid;benzalkonium chloride;rhodamine;antibacterial free fatty acids;nitroimidazole	efflux
ARO:3004669	AAL02176.1	emtA	Enterococcus faecium Partial	AF403298.1	non-erm 23S ribosomal RNA methyltransferase (G748)	macrolide ;lincosamide	target alteration
ARO:3004042	ABG77965.1	Enterobacter cloacae acrA	Enterobacter cloacae	DQ679966	resistance-nodulation-cell division (RND) efflux pump	macrolide ;fluoroquinolone ;monobactam;aminoglycoside ;carbapenem;cephalosporin;glycylcycline;penam;tetracycline ;acridine dye;aminocoumarin ;rifamycin ;diaminopyrimidine ;phenicol ;triclosan;antibacterial free fatty acids	efflux
ARO:3003760	AEA93051.1	Enterococcus faecalis cls conferring resistance to daptomycin	Enterococcus faecalis OG1RF	CP002621.1	daptomycin resistant cls	peptide	target alteration
ARO:3003805	AMR95642.1	Enterococcus faecalis gshF with mutation conferring daptomycin resistance	Enterococcus faecalis	CP014949.1	daptomycin resistant gshF	peptide	target alteration
ARO:3003792	AAO82599.1	Enterococcus faecalis liaR mutant conferring daptomycin resistance	Enterococcus faecalis V583	AE016830.1	daptomycin resistant liaR	peptide	target alteration
ARO:3003791	AAO82600.1	Enterococcus faecalis liaS mutant conferring daptomycin resistance	Enterococcus faecalis V583	AE016830.1	daptomycin resistant liaS	peptide	target alteration
ARO:3003797	AAO79895.1	Enterococcus faecalis YybT with mutation conferring daptomycin resistance	Enterococcus faecalis V583	AE016830.1	daptomycin resistant YybT	peptide	target alteration
ARO:3003092	ALL09868.1	Enterococcus faecium cls conferring resistance to daptomycin	Enterococcus faecium	CP013009.1	daptomycin resistant cls	peptide	target alteration
ARO:3003438	AFK57679.1	Enterococcus faecium EF-Tu mutants conferring resistance to GE2270A	Enterococcus faecium DO	CP003583.1	elfamycin resistant EF-Tu	elfamycin	target alteration
ARO:3003790	CUX99269.1	Enterococcus faecium liaF mutant conferring daptomycin resistance	Enterococcus faecium	LN999844.1	daptomycin resistant liaF	peptide	target alteration
ARO:3003078	AFK58562.1	Enterococcus faecium liaR mutant conferring daptomycin resistance	Enterococcus faecium DO	CP003583	daptomycin resistant liaR	peptide	target alteration
ARO:3003079	AFK58561.1	Enterococcus faecium liaS mutant conferring daptomycin resistance	Enterococcus faecium DO	CP003583	daptomycin resistant liaS	peptide	target alteration
ARO:3003576	BAE78116.1	eptA	Escherichia coli str. K-12 substr. W3110	AP009048	pmr phosphoethanolamine transferase	peptide	target alteration
ARO:3002826	AAC78336.1	EreA2	Providencia stuartii	AF099140	macrolide esterase	macrolide	inactivation
ARO:3000363	CAA27626.1	EreB	Escherichia coli	X03988.1	macrolide esterase	macrolide	inactivation
ARO:3004608	AKO71461.1	EreD	Riemerella anatipestifer	KP265721.1	macrolide esterase	macrolide	inactivation
ARO:3001265	AAC69328.1	Erm(30)	Streptomyces venezuelae	AF079138.1	Erm 23S ribosomal RNA methyltransferase	macrolide ;lincosamide ;streptogramin	target alteration
ARO:3000598	AAC69327.1	Erm(31)	Streptomyces venezuelae	AF079138	Erm 23S ribosomal RNA methyltransferase	macrolide ;lincosamide ;streptogramin	target alteration
ARO:3000599	CAC86410.1	Erm(33)	Staphylococcus sciuri	AJ313523.1	Erm 23S ribosomal RNA methyltransferase	macrolide ;lincosamide ;streptogramin	target alteration
ARO:3000600	AAP74657.1	Erm(34)	Bacillus clausii	AY234334	Erm 23S ribosomal RNA methyltransferase	macrolide ;lincosamide ;streptogramin	target alteration
ARO:3000604	AAK07612.2	Erm(35)	Bacteroides coprosuis DSM 18011	AF319779.2	Erm 23S ribosomal RNA methyltransferase	macrolide ;lincosamide ;streptogramin	target alteration
ARO:3000605	AAL68827.1	Erm(36)	Micrococcus luteus	AF462611	Erm 23S ribosomal RNA methyltransferase	macrolide ;lincosamide ;streptogramin	target alteration
ARO:3000392	CCP44758.1	Erm(37)	Mycobacterium tuberculosis H37Rv	AL123456	Erm 23S ribosomal RNA methyltransferase	macrolide ;lincosamide ;streptogramin	target alteration
ARO:3000601	AAN86837.2	Erm(38)	Mycolicibacterium smegmatis	AY154657.2	Erm 23S ribosomal RNA methyltransferase	macrolide ;lincosamide ;streptogramin	target alteration
ARO:3000602	AAR92235.1	Erm(39)	Mycolicibacterium fortuitum	AY487229	Erm 23S ribosomal RNA methyltransferase	macrolide ;lincosamide ;streptogramin	target alteration
ARO:3004606	AAS76623.1	erm(40)	Mycolicibacterium mageritense Partial	AY570506.1	Erm 23S ribosomal RNA methyltransferase	macrolide ;lincosamide ;streptogramin	target alteration
ARO:3000603	ABW06859.1	Erm(41)	Mycobacteroides abscessus	EU177504	Erm 23S ribosomal RNA methyltransferase	macrolide ;lincosamide ;streptogramin	target alteration
ARO:3003106	CBY77552.1	Erm(42)	Pasteurella multocida	FR734406	Erm 23S ribosomal RNA methyltransferase	macrolide ;lincosamide ;streptogramin	target alteration
ARO:3003205	CCF55073.1	Erm(43)	Staphylococcus lentus	HE650138	Erm 23S ribosomal RNA methyltransferase	macrolide ;lincosamide ;streptogramin	target alteration
ARO:3004596	AJF36617.1	erm(46)	Rhodococcus hoagii	KM679362.1	Erm 23S ribosomal RNA methyltransferase	macrolide ;lincosamide ;streptogramin	target alteration
ARO:3003908	ANZ79476.1	Erm(47)	Helcococcus kunzii	KU612222.1	Erm 23S ribosomal RNA methyltransferase	macrolide ;lincosamide ;streptogramin	target alteration
ARO:3004094	CZT31773.1	Erm(48)	Staphylococcus xylosus	LT223129	Erm 23S ribosomal RNA methyltransferase	macrolide ;lincosamide ;streptogramin	target alteration
ARO:3004626	OPG86592.1	Erm(49)	Bifidobacterium breve	MWVR01000009.1	Erm 23S ribosomal RNA methyltransferase	macrolide ;lincosamide ;streptogramin	target alteration
ARO:3004643	WP_010896559.1	Erm(K)	Bacillus halodurans	NG_047831.1	Erm 23S ribosomal RNA methyltransferase	macrolide ;lincosamide ;streptogramin	target alteration
ARO:3004652	AAA26779.1	Erm(O)-lrm	Streptomyces lividans	M74717.1	Erm 23S ribosomal RNA methyltransferase	macrolide ;lincosamide ;streptogramin	target alteration
ARO:3004595	CEJ95855.1	erm45	Staphylococcus fleurettii	LN680996.1	Erm 23S ribosomal RNA methyltransferase	macrolide ;lincosamide ;streptogramin	target alteration
ARO:3000347	CAA26964.1	ErmA	Staphylococcus aureus	X03216.1	Erm 23S ribosomal RNA methyltransferase	macrolide ;lincosamide ;streptogramin	target alteration
ARO:3000375	AAF86219.1	ErmB	Enterococcus faecium Partial	AF242872.1	Erm 23S ribosomal RNA methyltransferase	macrolide ;lincosamide ;streptogramin	target alteration
ARO:3000250	AAA98296.1	ErmC	Staphylococcus epidermidis	M12730	Erm 23S ribosomal RNA methyltransferase	macrolide ;lincosamide ;streptogramin	target alteration
ARO:3000495	AAA22597.1	ErmD	Bacillus anthracis	L08389	Erm 23S ribosomal RNA methyltransferase	macrolide ;lincosamide ;streptogramin	target alteration
ARO:3000326	CAB60001.1	ErmE	Saccharopolyspora erythraea NRRL 2338	X51891	Erm 23S ribosomal RNA methyltransferase	macrolide ;lincosamide ;streptogramin	target alteration
ARO:3000498	AAA88675.1	ErmF	Bacteroides fragilis	M17124	Erm 23S ribosomal RNA methyltransferase	macrolide ;lincosamide ;streptogramin	target alteration
ARO:3000522	AAC37034.1	ErmG	Bacteroides thetaiotaomicron	L42817	Erm 23S ribosomal RNA methyltransferase	macrolide ;lincosamide ;streptogramin	target alteration
ARO:3002823	AAC32026.1	ErmH	Streptomyces thermotolerans	M16503	Erm 23S ribosomal RNA methyltransferase	macrolide ;lincosamide ;streptogramin	target alteration
ARO:3000593	AAC36915.1	ErmQ	Clostridium perfringens	L22689	Erm 23S ribosomal RNA methyltransferase	macrolide ;lincosamide ;streptogramin	target alteration
ARO:3000594	AAU93796.1	ErmR	Aeromicrobium erythreum Partial	AY623658	Erm 23S ribosomal RNA methyltransferase	macrolide ;lincosamide ;streptogramin	target alteration
ARO:3001304	AAA26742.1	ErmS	Streptomyces fradiae	M19269	Erm 23S ribosomal RNA methyltransferase	macrolide ;lincosamide ;streptogramin	target alteration
ARO:3000595	AAA98096.1	ErmT	Plasmid pGT633	M64090	Erm 23S ribosomal RNA methyltransferase	macrolide ;lincosamide ;streptogramin	target alteration
ARO:3001305	CAA44667.1	ErmU	Streptomyces lincolnensis	X62867.1	Erm 23S ribosomal RNA methyltransferase	macrolide ;lincosamide ;streptogramin	target alteration
ARO:3002824	AAB51440.1	ErmV	Streptomyces viridochromogenes	U59450	Erm 23S ribosomal RNA methyltransferase	macrolide ;lincosamide ;streptogramin	target alteration
ARO:3001306	BAA03402.1	ErmW	Micromonospora griseorubida	D14532	Erm 23S ribosomal RNA methyltransferase	macrolide ;lincosamide ;streptogramin	target alteration
ARO:3000596	AAA98484.1	ErmX	Plasmid pNG2	M36726.1	Erm 23S ribosomal RNA methyltransferase	macrolide ;lincosamide ;streptogramin	target alteration
ARO:3002825	BAB20748.1	ErmY	Staphylococcus aureus	AB014481	Erm 23S ribosomal RNA methyltransferase	macrolide ;lincosamide ;streptogramin	target alteration
ARO:3004605	CAM96571.1	ermZ	Streptomyces ambofaciens	AM709783.1	Erm 23S ribosomal RNA methyltransferase	macrolide ;lincosamide ;streptogramin	target alteration
ARO:3004043	AAC73565.1	Escherichia coli acrA	Escherichia coli str. K-12 substr. MG1655	U00096.3	resistance-nodulation-cell division (RND) efflux pump	macrolide ;fluoroquinolone ;monobactam;aminoglycoside ;carbapenem;cephalosporin;glycylcycline;penam;tetracycline ;acridine dye;aminocoumarin ;rifamycin ;diaminopyrimidine ;phenicol ;triclosan;antibacterial free fatty acids	efflux
ARO:3003807	AAC73566.1	Escherichia coli acrR with mutation conferring multidrug resistance	Escherichia coli str. K-12 substr. MG1655	U00096.3	resistance-nodulation-cell division (RND) efflux pump	macrolide ;fluoroquinolone ;monobactam;aminoglycoside ;carbapenem;cephalosporin;glycylcycline;penam;tetracycline ;acridine dye;aminocoumarin ;rifamycin ;diaminopyrimidine ;phenicol ;triclosan;antibacterial free fatty acids	target alteration; efflux
ARO:3004611	CBJ02047.1	Escherichia coli ampC1 beta-lactamase	Escherichia coli ETEC H10407	FN649414.1	ampC-type beta-lactamase	cephalosporin;penam	inactivation
ARO:3004612	BAJ42218.1	Escherichia coli ampH	Escherichia coli DH1	AP012030.1	ampC-type beta-lactamase	cephalosporin;penam	inactivation
ARO:3003900	CDJ73082	Escherichia coli CyaA with mutation conferring resistance to fosfomycin	Escherichia coli str. K-12 substr. MC4100	HG738867	cya adenylate cyclase	fosfomycin	target alteration
ARO:3003368	AAA50993.1	Escherichia coli EF-Tu mutants conferring resistance to kirromycin	Escherichia coli	AH002539.2	elfamycin resistant EF-Tu	elfamycin	target alteration
ARO:3003369	AAN82549.1	Escherichia coli EF-Tu mutants conferring resistance to Pulvomycin	Escherichia coli CFT073	AE014075.1	elfamycin resistant EF-Tu	elfamycin	target alteration
ARO:3004039	CAA77936.1	Escherichia coli emrE	Escherichia coli	Z11877.1	small multidrug resistance (SMR) efflux pump	macrolide ;aminoglycoside ;tetracycline ;aminocoumarin ;phenicol	efflux
ARO:3003386	AAC76209.2	Escherichia coli folP with mutation conferring resistance to sulfonamides	Escherichia coli str. K-12 substr. MG1655	U00096.3	sulfonamide resistant dihydropteroate synthase folP	sulfonamide ;sulfone	target alteration
ARO:3003889	CDJ72593	Escherichia coli GlpT with mutation conferring resistance to fosfomycin	Escherichia coli str. K-12 substr. MC4100	HG738867	GlpT	fosfomycin	target alteration
ARO:3003294	AAC75291.1	Escherichia coli gyrA with mutation conferring resistance to triclosan	Escherichia coli str. K-12 substr. MG1655	U00096.3	triclosan resistant gyrA	triclosan	target alteration
ARO:3003303	BAE77595.1	Escherichia coli gyrB conferring resistance to aminocoumarin	Escherichia coli str. K-12 substr. W3110	AP009048	aminocoumarin resistant gyrB	aminocoumarin	target alteration
ARO:3004126	BAB38442	Escherichia coli LamB	Escherichia coli O157:H7 str. Sakai	BA000007	Sugar Porin (SP)	fluoroquinolone ;tetracycline	reduced permeability to ;resistance by absence
ARO:3003378	AAC74603.2	Escherichia coli marR mutant conferring resistance	Escherichia coli str. K-12 substr. MG1655	U00096	resistance-nodulation-cell division (RND) efflux pump	macrolide ;fluoroquinolone ;monobactam;aminoglycoside ;carbapenem;cephalosporin;glycylcycline;penam;tetracycline ;acridine dye;aminocoumarin ;rifamycin ;diaminopyrimidine ;phenicol ;triclosan;antibacterial free fatty acids	target alteration; efflux
ARO:3001328	AFH35853.1	Escherichia coli mdfA	Escherichia coli	JQ394987	major facilitator superfamily (MFS) efflux pump	macrolide ;fluoroquinolone ;lincosamide ;fosfomycin;cephalosporin;glycylcycline;bicyclomycin;penam;nucleoside ;tetracycline ;peptide ;acridine dye;oxazolidinone ;rifamycin ;diaminopyrimidine ;phenicol ;isoniazid;benzalkonium chloride;rhodamine;antibacterial free fatty acids;nitroimidazole	efflux
ARO:3004127	NP_310518	Escherichia coli MipA	Escherichia coli O157:H7 str. Sakai	NC_002695	MipA-interacting Protein	fluoroquinolone ;aminoglycoside	reduced permeability to ;resistance by absence
ARO:3003775	AIL15701	Escherichia coli murA with mutation conferring resistance to fosfomycin	Escherichia coli ATCC 25922	CP009072	murA transferase	fosfomycin	target alteration
ARO:3003751	AAC73938.1	Escherichia coli nfsA mutations conferring resistance to nitrofurantoin	Escherichia coli str. K-12 substr. MG1655	U00096.3	resistant nfsA	nitrofuran	target alteration
ARO:3003308	AAC76055.1	Escherichia coli parC conferring resistance to fluoroquinolone	Escherichia coli str. K-12 substr. MG1655	U00096.3	fluoroquinolone resistant parC;fluoroquinolone self resistant parC	fluoroquinolone	target alteration
ARO:3003316	BAE77086.1	Escherichia coli parE conferring resistance to fluoroquinolones	Escherichia coli str. K-12 substr. W3110	AP009048.1	fluoroquinolone resistant parE	fluoroquinolone	target alteration
ARO:3003899	CDJ72759	Escherichia coli PtsI with mutation conferring resistance to fosfomycin	Escherichia coli str. K-12 substr. MC4100	HG738867	PtsI phosphotransferase	fosfomycin	target alteration
ARO:3003288	BAB38333.1	Escherichia coli rpoB mutants conferring resistance to rifampicin	Escherichia coli O157:H7 str. Sakai	BA000007.3	rifamycin-resistant beta-subunit of RNA polymerase (rpoB)	peptide ;rifamycin	target alteration; target replacement
ARO:3003381	AAC77033.1	Escherichia coli soxR with mutation conferring resistance	Escherichia coli str. K-12 substr. MG1655	U00096	ATP-binding cassette (ABC) efflux pump;major facilitator superfamily (MFS) efflux pump;resistance-nodulation-cell division (RND) efflux pump	macrolide ;fluoroquinolone ;monobactam;aminoglycoside ;lincosamide ;carbapenem;fosfomycin;cephalosporin;glycylcycline;bicyclomycin;penam;nucleoside ;tetracycline ;peptide ;acridine dye;oxazolidinone ;aminocoumarin ;rifamycin ;diaminopyrimidine ;phenicol ;isoniazid;pleuromutilin ;triclosan;benzalkonium chloride;rhodamine;antibacterial free fatty acids;nitroimidazole	target alteration; efflux
ARO:3003511	AAC77032.1	Escherichia coli soxS with mutation conferring resistance	Escherichia coli str. K-12 substr. MG1655	U00096.3	ATP-binding cassette (ABC) efflux pump;major facilitator superfamily (MFS) efflux pump;resistance-nodulation-cell division (RND) efflux pump;General Bacterial Porin with reduced permeability to beta-lactams	macrolide ;fluoroquinolone ;monobactam;aminoglycoside ;lincosamide ;carbapenem;fosfomycin;cephalosporin;glycylcycline;cephamycin;bicyclomycin;penam;nucleoside ;tetracycline ;peptide ;acridine dye;oxazolidinone ;aminocoumarin ;rifamycin ;diaminopyrimidine ;phenicol ;isoniazid;pleuromutilin ;triclosan;penem;benzalkonium chloride;rhodamine;antibacterial free fatty acids;nitroimidazole	target alteration; efflux;reduced permeability to
ARO:3003893	CDJ73205	Escherichia coli UhpA with mutation conferring resistance to fosfomycin	Escherichia coli str. K-12 substr. MC4100	HG738867	UhpT;UhpA	fosfomycin	target alteration
ARO:3003890	CDJ73208	Escherichia coli UhpT with mutation conferring resistance to fosfomycin	Escherichia coli str. K-12 substr. MC4100	HG738867	UhpT	fosfomycin	target alteration
ARO:3003717	AJP77085	ESP-1	Chryseobacterium sp. Stok-2	KP109681	ESP beta-lactamase	carbapenem	inactivation
ARO:3000832	BAB36671.1	evgA	Escherichia coli O157:H7 str. Sakai	BA000007.3	major facilitator superfamily (MFS) efflux pump;resistance-nodulation-cell division (RND) efflux pump	macrolide ;fluoroquinolone ;monobactam;aminoglycoside ;lincosamide ;carbapenem;fosfomycin;cephalosporin;glycylcycline;bicyclomycin;penam;nucleoside ;tetracycline ;peptide ;acridine dye;oxazolidinone ;aminocoumarin ;rifamycin ;diaminopyrimidine ;phenicol ;isoniazid;triclosan;benzalkonium chloride;rhodamine;antibacterial free fatty acids;nitroimidazole	efflux
ARO:3000833	AAC75429.1	evgS	Escherichia coli str. K-12 substr. MG1655	U00096	major facilitator superfamily (MFS) efflux pump;resistance-nodulation-cell division (RND) efflux pump	macrolide ;fluoroquinolone ;monobactam;aminoglycoside ;lincosamide ;carbapenem;fosfomycin;cephalosporin;glycylcycline;bicyclomycin;penam;nucleoside ;tetracycline ;peptide ;acridine dye;oxazolidinone ;aminocoumarin ;rifamycin ;diaminopyrimidine ;phenicol ;isoniazid;triclosan;benzalkonium chloride;rhodamine;antibacterial free fatty acids;nitroimidazole	efflux
ARO:3003564	AAA26775.1	EXO beta-lactamase	Streptomyces albus	M28303	EXO beta-lactamase	penam	inactivation
ARO:3001313	AFK80333.1	facT	Streptomyces sp. WAC5292	JQ768046	major facilitator superfamily (MFS) efflux pump	macrolide ;fluoroquinolone ;lincosamide ;fosfomycin;cephalosporin;glycylcycline;bicyclomycin;penam;nucleoside ;tetracycline ;peptide ;acridine dye;oxazolidinone ;rifamycin ;diaminopyrimidine ;phenicol ;isoniazid;elfamycin ;benzalkonium chloride;rhodamine;antibacterial free fatty acids;nitroimidazole	efflux
ARO:3003961	AAF40763.1	farA	Neisseria meningitidis MC58	AE002098.2	major facilitator superfamily (MFS) efflux pump	macrolide ;fluoroquinolone ;lincosamide ;fosfomycin;cephalosporin;glycylcycline;bicyclomycin;penam;nucleoside ;tetracycline ;peptide ;acridine dye;oxazolidinone ;rifamycin ;diaminopyrimidine ;phenicol ;isoniazid;benzalkonium chloride;rhodamine;antibacterial free fatty acids;nitroimidazole	efflux
ARO:3003962	AAF40764.1	farB	Neisseria meningitidis MC58	AE002098.2	major facilitator superfamily (MFS) efflux pump	macrolide ;fluoroquinolone ;lincosamide ;fosfomycin;cephalosporin;glycylcycline;bicyclomycin;penam;nucleoside ;tetracycline ;peptide ;acridine dye;oxazolidinone ;rifamycin ;diaminopyrimidine ;phenicol ;isoniazid;benzalkonium chloride;rhodamine;antibacterial free fatty acids;nitroimidazole	efflux
ARO:3002704	CAD70268.1	fexA	Staphylococcus lentus	AJ549214	major facilitator superfamily (MFS) efflux pump	macrolide ;fluoroquinolone ;lincosamide ;fosfomycin;cephalosporin;glycylcycline;bicyclomycin;penam;nucleoside ;tetracycline ;peptide ;acridine dye;oxazolidinone ;rifamycin ;diaminopyrimidine ;phenicol ;isoniazid;benzalkonium chloride;rhodamine;antibacterial free fatty acids;nitroimidazole	efflux
ARO:3000606	CAB96921.1	FEZ-1 beta-lactamase	Fluoribacter gormanii	Y17896	FEZ beta-lactamase	carbapenem;cephalosporin;penam	inactivation
ARO:3002705	AAG16656.1	floR	Escherichia coli	AF231986	major facilitator superfamily (MFS) efflux pump	macrolide ;fluoroquinolone ;lincosamide ;fosfomycin;cephalosporin;glycylcycline;bicyclomycin;penam;nucleoside ;tetracycline ;peptide ;acridine dye;oxazolidinone ;rifamycin ;diaminopyrimidine ;phenicol ;isoniazid;benzalkonium chloride;rhodamine;antibacterial free fatty acids;nitroimidazole	efflux
ARO:3000423	BAA32493.1	FomA	Streptomyces wedmorensis	AB016934	Fom phosphotransferase family	fosfomycin	inactivation
ARO:3000149	AAG04518.1	fosA	Pseudomonas aeruginosa PAO1	AE004091.2	fosfomycin thiol transferase	fosfomycin	inactivation
ARO:3002804	ACC85616.1	FosA2	Enterobacter cloacae	EU487198	fosfomycin thiol transferase	fosfomycin	inactivation
ARO:3002872	AEG78825.1	FosA3	Escherichia coli	JF411006	fosfomycin thiol transferase	fosfomycin	inactivation
ARO:3003210	BAP18892.1	FosA4	Escherichia coli	AB908992	fosfomycin thiol transferase	fosfomycin	inactivation
ARO:3003209	AJE60855.1	FosA5	Escherichia coli	KP143090.1	fosfomycin thiol transferase	fosfomycin	inactivation
ARO:3004111	AMQ12811.1	FosA6	Escherichia coli	KU254579.1	fosfomycin thiol transferase	fosfomycin	inactivation
ARO:3004113	KKE03230.1	FosA7	Salmonella enterica subsp. enterica serovar Heidelberg	LAPJ01000014.1	fosfomycin thiol transferase	fosfomycin	inactivation
ARO:3000172	AAP08996.1	FosB	Bacillus cereus ATCC 14579	AE016877.1	fosfomycin thiol transferase	fosfomycin	inactivation
ARO:3004670	BAE05988.1	FosB1	Staphylococcus haemolyticus JCSC1435	AP006717.1	fosfomycin thiol transferase	fosfomycin	inactivation
ARO:3002873	ADX95999.1	FosB3	Enterococcus faecium	HQ219726	fosfomycin thiol transferase	fosfomycin	inactivation
ARO:3004671	ALM24139.1	FosB4	Staphylococcus aureus	KR870311.1	fosfomycin thiol transferase	fosfomycin	inactivation
ARO:3004673	ALM24145.1	FosB6	Staphylococcus aureus	KR870314.1	fosfomycin thiol transferase	fosfomycin	inactivation
ARO:3000380	CAA83855.1	FosC	Pseudomonas syringae	Z33413	fosC phosphotransferase family	fosfomycin	inactivation
ARO:3002874	BAJ10053.1	FosC2	Escherichia coli	AB522969	fosC phosphotransferase family	fosfomycin	inactivation
ARO:3004674	BAG12271.1	FosD	Staphylococcus aureus	AB304512.1	fosfomycin thiol transferase	fosfomycin	inactivation
ARO:3003207	BAO79518.1	FosK	Acinetobacter soli	AB917040	fosfomycin thiol transferase	fosfomycin	inactivation
ARO:3000198	CWV56762.1	FosX	Listeria monocytogenes	FFFO01000009.1	fosfomycin thiol transferase	fosfomycin	inactivation
ARO:3002155	CAA54602.1	FOX-1	Klebsiella pneumoniae	X77455	FOX beta-lactamase	cephalosporin;cephamycin	inactivation
ARO:3002162	AGE45503.1	FOX-10	Klebsiella pneumoniae	JX049131	FOX beta-lactamase	cephalosporin;cephamycin	inactivation
ARO:3002156	CAA71325.1	FOX-2	Escherichia coli	Y10282	FOX beta-lactamase	cephalosporin;cephamycin	inactivation
ARO:3002158	CAB89086.1	FOX-4	Escherichia coli	AJ277535	FOX beta-lactamase	cephalosporin;cephamycin	inactivation
ARO:3002159	AAG12974.1	FOX-5	Klebsiella pneumoniae	AY007369	FOX beta-lactamase	cephalosporin;cephamycin	inactivation
ARO:3002160	CAG28256.1	FOX-7	Klebsiella pneumoniae	AJ703795	FOX beta-lactamase	cephalosporin;cephamycin	inactivation
ARO:3002161	ADK73994.1	FOX-8	Escherichia coli	HM565917	FOX beta-lactamase	cephalosporin;cephamycin	inactivation
ARO:3002163	AEK78851.1	FOX-9	Klebsiella pneumoniae	JF896803	FOX beta-lactamase	cephalosporin;cephamycin	inactivation
ARO:3003026	CAA90432.1	fusH	Streptomyces lividans	Z50108	fusidic acid inactivation enzyme	fusidic acid	inactivation
ARO:3003838	ANK04027.1	gadW	Escherichia coli O25b:H4	CP015085.1	resistance-nodulation-cell division (RND) efflux pump	macrolide ;fluoroquinolone ;monobactam;aminoglycoside ;carbapenem;glycylcycline;penam;tetracycline ;acridine dye;aminocoumarin ;diaminopyrimidine ;phenicol ;triclosan;antibacterial free fatty acids	efflux
ARO:3000508	BAE77778.1	gadX	Escherichia coli str. K-12 substr. W3110	AP009048.1	resistance-nodulation-cell division (RND) efflux pump	macrolide ;fluoroquinolone ;monobactam;aminoglycoside ;carbapenem;glycylcycline;penam;tetracycline ;acridine dye;aminocoumarin ;diaminopyrimidine ;phenicol ;triclosan;antibacterial free fatty acids	efflux
ARO:3002330	AAF27723.1	GES-1	Klebsiella pneumoniae	AF156486	GES beta-lactamase	carbapenem;cephalosporin;penam	inactivation
ARO:3000845	CAF05908.1	GIM-1	Pseudomonas aeruginosa	AJ620678	GIM beta-lactamase	monobactam;carbapenem;cephalosporin;cephamycin;penam;penem	inactivation
ARO:3000463	CAA11707.1	gimA	Streptomyces ambofaciens	AJ223970	gimA family macrolide glycosyltransferase	macrolide	inactivation
ARO:3000850	AAF04458.1	GOB-1 beta-lactamase	Elizabethkingia meningoseptica	AF090141	GOB beta-lactamase	carbapenem;cephalosporin;penam	inactivation
ARO:3004213	AAY53478.1	GOB-18	Elizabethkingia meningoseptica	DQ004496.1	GOB beta-lactamase	carbapenem;cephalosporin;penam	inactivation
ARO:3000504	AAL19308.1	golS	Salmonella enterica subsp. enterica serovar Typhimurium str. LT2	AE006468.2	resistance-nodulation-cell division (RND) efflux pump	macrolide ;fluoroquinolone ;monobactam;aminoglycoside ;carbapenem;cephalosporin;glycylcycline;cephamycin;penam;tetracycline ;acridine dye;aminocoumarin ;diaminopyrimidine ;phenicol ;triclosan;penem;antibacterial free fatty acids	efflux
ARO:3004446	AAC22787.1	Haemophilus influenzae PBP3 conferring resistance to beta-lactam s	Haemophilus influenzae Rd KW20	L42023.1	Penicillin-binding protein mutations conferring resistance to beta-lactam s	monobactam;carbapenem;cephalosporin;cephamycin;penam	target alteration
ARO:3003924	CBW16027.1	Haemophilus parainfluenzae gyrA conferring resistance to fluoroquinolones	Haemophilus parainfluenzae T3T1	FQ312002.1	fluoroquinolone resistant gyrA	fluoroquinolone ;nybomycin	target alteration
ARO:3003925	WP_041918279.1	Haemophilus parainfluenzae parC conferring resistance to fluoroquinolones	Haemophilus parainfluenzae	NC_015964.1	fluoroquinolone resistant parC	fluoroquinolone	target alteration
ARO:3004092	AMY61250.1	HMB-1 beta-lactamase	Pseudomonas aeruginosa	KU961660	HMB beta-lactamase	carbapenem	inactivation
ARO:3003953	ADO96486.1	hmrM	Haemophilus influenzae R2846	CP002276.1	multidrug and toxic compound extrusion (MATE) transporter	fluoroquinolone ;glycylcycline;tetracycline ;acridine dye	efflux
ARO:3000676	BAB35162.1	H-NS	Escherichia coli O157:H7 str. Sakai	BA000007.3	major facilitator superfamily (MFS) efflux pump;resistance-nodulation-cell division (RND) efflux pump	macrolide ;fluoroquinolone ;monobactam;aminoglycoside ;lincosamide ;carbapenem;fosfomycin;cephalosporin;glycylcycline;cephamycin;bicyclomycin;penam;nucleoside ;tetracycline ;peptide ;acridine dye;oxazolidinone ;aminocoumarin ;rifamycin ;diaminopyrimidine ;phenicol ;isoniazid;triclosan;benzalkonium chloride;rhodamine;antibacterial free fatty acids;nitroimidazole	efflux
ARO:3003964	AAD08227.1	hp1181	Helicobacter pylori 26695	AE000511.1	major facilitator superfamily (MFS) efflux pump	macrolide ;fluoroquinolone ;lincosamide ;fosfomycin;cephalosporin;glycylcycline;bicyclomycin;penam;nucleoside ;tetracycline ;peptide ;acridine dye;oxazolidinone ;rifamycin ;diaminopyrimidine ;phenicol ;isoniazid;benzalkonium chloride;rhodamine;antibacterial free fatty acids;nitroimidazole	efflux
ARO:3004466	EGE18576.1	ICR-Mc	Moraxella catarrhalis BC1	AERH01000018.1	intrinsic colistin resistant phosphoethanolamine transferase	peptide	target alteration
ARO:3004569	WP_082741435.1	ICR-Mo	Moraxella osloensis	NZ_CP014234.1	intrinsic colistin resistant phosphoethanolamine transferase	peptide	target alteration
ARO:3003094	CAD69003.1	imiH	Aeromonas hydrophila	AJ548797	CphA beta-lactamase	carbapenem	inactivation
ARO:3003095	CAA71441.1	imiS	Aeromonas veronii	Y10415	CphA beta-lactamase	carbapenem	inactivation
ARO:3002222	AGS82587.1	IMP-31	Pseudomonas aeruginosa	KF148593	IMP beta-lactamase	carbapenem;cephalosporin;cephamycin;penam;penem	inactivation
ARO:3002226	AFO59566.1	IMP-35	Pseudomonas aeruginosa	JF816544	IMP beta-lactamase	carbapenem;cephalosporin;cephamycin;penam;penem	inactivation
ARO:3002228	AFP97028.1	IMP-37	Pseudomonas aeruginosa	JX131372	IMP beta-lactamase	carbapenem;cephalosporin;cephamycin;penam;penem	inactivation
ARO:3003659	BAQ56016.1	IMP-51	Pseudomonas aeruginosa	LC031883	IMP beta-lactamase	carbapenem;cephalosporin;cephamycin;penam;penem	inactivation
ARO:3004495	ALT53802.1	IMP-56	Pseudomonas aeruginosa	KU315553.1	IMP beta-lactamase	carbapenem;cephalosporin;cephamycin;penam;penem	inactivation
ARO:3002261	AAS78754.1	IND-5	Chryseobacterium indologenes	AY504627	IND beta-lactamase	carbapenem	inactivation
ARO:3002262	CAJ32373.2	IND-6	Chryseobacterium indologenes	AM087455	IND beta-lactamase	carbapenem	inactivation
ARO:3002884	AAB41059.1	iri	Rhodococcus hoagii	U56415	rifampin monooxygenase	rifamycin	inactivation
ARO:3000840	AAK38324.1	JOHN-1 beta-lactamase	Flavobacterium johnsoniae UW101	AY028464	JOHN beta-lactamase	carbapenem;cephalosporin;penam	inactivation
ARO:3003841	AAC73788.1	kdpE	Escherichia coli str. K-12 substr. MG1655	U00096.3	kdpDE	aminoglycoside	efflux
ARO:3000847	BAF91108.1	KHM-1 beta-lactamase	Citrobacter freundii	AB364006	KHM beta-latamase	carbapenem;cephalosporin;cephamycin;penam;penem	inactivation
ARO:3003374	CAC35723.1	Klebsiella aerogenes acrR with mutation conferring multidrug resistance	Klebsiella aerogenes	AJ306389.1	resistance-nodulation-cell division (RND) efflux pump	macrolide ;fluoroquinolone ;monobactam;aminoglycoside ;carbapenem;cephalosporin;glycylcycline;penam;tetracycline ;acridine dye;aminocoumarin ;rifamycin ;diaminopyrimidine ;phenicol ;triclosan;antibacterial free fatty acids	target alteration; efflux
ARO:3003385	AAK11270.1	Klebsiella aerogenes omp36 with mutation	Klebsiella aerogenes	AF335467	General Bacterial Porin with reduced permeability to beta-lactams	monobactam;carbapenem;cephalosporin;cephamycin;penam;penem	reduced permeability to
ARO:3003585	CDO13981.1	Klebsiella mutant PhoP conferring resistance to colistin	Klebsiella pneumoniae	FO834906.1	ATP-binding cassette (ABC) efflux pump;pmr phosphoethanolamine transferase	macrolide ;fluoroquinolone ;cephalosporin;penam;tetracycline ;peptide ;acridine dye;rifamycin ;pleuromutilin ;nitroimidazole	target alteration; efflux
ARO:3004041	CAC41008.1	Klebsiella pneumoniae acrA	Klebsiella pneumoniae	AJ318073.1	resistance-nodulation-cell division (RND) efflux pump	macrolide ;fluoroquinolone ;monobactam;aminoglycoside ;carbapenem;cephalosporin;glycylcycline;penam;tetracycline ;acridine dye;aminocoumarin ;rifamycin ;diaminopyrimidine ;phenicol ;triclosan;antibacterial free fatty acids	efflux
ARO:3003373	ABR75897.1	Klebsiella pneumoniae acrR with mutation conferring multidrug resistance	Klebsiella pneumoniae subsp. pneumoniae MGH 78578	CP000647	resistance-nodulation-cell division (RND) efflux pump	macrolide ;fluoroquinolone ;monobactam;aminoglycoside ;carbapenem;cephalosporin;glycylcycline;penam;tetracycline ;acridine dye;aminocoumarin ;rifamycin ;diaminopyrimidine ;phenicol ;triclosan;antibacterial free fatty acids	target alteration; efflux
ARO:3004580	BAH63251.1	Klebsiella pneumoniae KpnE	Klebsiella pneumoniae subsp. pneumoniae NTUH-K2044	AP006725.1	major facilitator superfamily (MFS) efflux pump	macrolide ;fluoroquinolone ;aminoglycoside ;lincosamide ;fosfomycin;cephalosporin;glycylcycline;bicyclomycin;penam;nucleoside ;tetracycline ;peptide ;acridine dye;oxazolidinone ;rifamycin ;diaminopyrimidine ;phenicol ;isoniazid;benzalkonium chloride;rhodamine;antibacterial free fatty acids;nitroimidazole	efflux
ARO:3004583	BAH63252.1	Klebsiella pneumoniae KpnF	Klebsiella pneumoniae subsp. pneumoniae NTUH-K2044	AP006725.1	major facilitator superfamily (MFS) efflux pump	macrolide ;fluoroquinolone ;aminoglycoside ;lincosamide ;fosfomycin;cephalosporin;glycylcycline;bicyclomycin;penam;nucleoside ;tetracycline ;peptide ;acridine dye;oxazolidinone ;rifamycin ;diaminopyrimidine ;phenicol ;isoniazid;benzalkonium chloride;rhodamine;antibacterial free fatty acids;nitroimidazole	efflux
ARO:3004588	EHL92831.1	Klebsiella pneumoniae KpnG	Klebsiella sp. 4_1_44FAA	ACWO01000051.1	major facilitator superfamily (MFS) efflux pump	macrolide ;fluoroquinolone ;aminoglycoside ;lincosamide ;carbapenem;fosfomycin;cephalosporin;glycylcycline;bicyclomycin;penam;nucleoside ;tetracycline ;peptide ;acridine dye;oxazolidinone ;rifamycin ;diaminopyrimidine ;phenicol ;isoniazid;penem;benzalkonium chloride;rhodamine;antibacterial free fatty acids;nitroimidazole	efflux
ARO:3004597	EOU56998.1	Klebsiella pneumoniae KpnH	Escherichia coli KTE14	ASTU01000063.1	major facilitator superfamily (MFS) efflux pump	macrolide ;fluoroquinolone ;aminoglycoside ;lincosamide ;carbapenem;fosfomycin;cephalosporin;glycylcycline;bicyclomycin;penam;nucleoside ;tetracycline ;peptide ;acridine dye;oxazolidinone ;rifamycin ;diaminopyrimidine ;phenicol ;isoniazid;penem;benzalkonium chloride;rhodamine;antibacterial free fatty acids;nitroimidazole	efflux
ARO:3003966	YP_005226137.1	Klebsiella pneumoniae OmpK35	Klebsiella pneumoniae subsp. pneumoniae HS11286	NC_016845.1	General Bacterial Porin with reduced permeability to beta-lactams	monobactam;carbapenem;cephalosporin;cephamycin;penam;penem	reduced permeability to ;resistance by absence
ARO:3003968	YP_005228001.1	Klebsiella pneumoniae OmpK36	Klebsiella pneumoniae subsp. pneumoniae HS11286	NC_016845.1	General Bacterial Porin with reduced permeability to beta-lactams	monobactam;carbapenem;cephalosporin;cephamycin;penam;penem	reduced permeability to ;resistance by absence
ARO:3004122	CAA09666.1	Klebsiella pneumoniae OmpK37	Klebsiella pneumoniae	AJ011502.1	General Bacterial Porin with reduced permeability to beta-lactams	monobactam;carbapenem;cephalosporin;cephamycin;penam;penem	reduced permeability to
ARO:3003380	ABR76005.1	Klebsiella pneumoniae ramR mutants	Klebsiella pneumoniae subsp. pneumoniae MGH 78578	CP000647.1	resistance-nodulation-cell division (RND) efflux pump	macrolide ;fluoroquinolone ;monobactam;aminoglycoside ;carbapenem;cephalosporin;glycylcycline;penam;tetracycline ;acridine dye;aminocoumarin ;rifamycin ;diaminopyrimidine ;phenicol ;triclosan;antibacterial free fatty acids	target alteration; efflux
ARO:3002317	ACE62798.1	KPC-7	Klebsiella pneumoniae	EU729727	KPC beta-lactamase	monobactam;carbapenem;cephalosporin;penam	inactivation
ARO:3000582	CAB75346.1	L1 beta-lactamase	Stenotrophomonas maltophilia	AJ272109	L1 family beta-lactamase	cephalosporin	inactivation
ARO:3004292	AAT46346.1	Laribacter hongkongensis ampC beta-lactamase	Laribacter hongkongensis	AY632076.1	ampC-type beta-lactamase	cephalosporin;penam	inactivation
ARO:3001857	CAA55007.1	LAT-1	Klebsiella pneumoniae	X78117	CMY beta-lactamase	cephamycin	inactivation
ARO:3002997	CAA40146.1	LCR-1	Pseudomonas aeruginosa	X56809	LCR beta-lactamase	cephalosporin;penam	inactivation
ARO:3002478	AAL50725.1	LEN-15	Klebsiella pneumoniae	AF452105	LEN beta-lactamase	penam;penem	inactivation
ARO:3002469	CAP12350.2	LEN-22	Klebsiella pneumoniae	AM850912	LEN beta-lactamase	penam;penem	inactivation
ARO:3002474	AGB34168.1	LEN-26	Klebsiella pneumoniae	JX124390.1	LEN beta-lactamase	penam;penem	inactivation
ARO:3002472	AAN05031.1	LEN-4	Klebsiella pneumoniae	AY130287	LEN beta-lactamase	penam;penem	inactivation
ARO:3004651	AEO25219.1	lin	Listeria monocytogenes FSL R2-561	CP002003.1	lincosamide nucleotidyltransferase (LNU)	lincosamide	inactivation
ARO:3002879	ABG65740.1	linG	Salmonella enterica subsp. enterica serovar Stanley	DQ836009.1	lincosamide nucleotidyltransferase (LNU)	lincosamide	inactivation
ARO:3003770	CAC99773.1	Listeria monocytogenes mprF	Listeria monocytogenes EGD-e	AL591981.1	defensin resistant mprF	peptide	target alteration
ARO:3003982	APB03216.1	LlmA 23S ribosomal RNA methyltransferase	Paenibacillus sp. LC231	KX531046.1	Llm 23S ribosomal RNA methyltransferase	lincosamide	target alteration
ARO:3003028	CAA42550.1	lmrA	Streptomyces lincolnensis	X59926.1	ATP-binding cassette (ABC) efflux pump	macrolide ;fluoroquinolone ;lincosamide ;cephalosporin;penam;tetracycline ;peptide ;acridine dye;rifamycin ;pleuromutilin ;nitroimidazole	target alteration; efflux
ARO:3002813	KIX81495.1	lmrB	Bacillus subtilis	JYFL01000006.1	ATP-binding cassette (ABC) efflux pump	macrolide ;fluoroquinolone ;lincosamide ;cephalosporin;penam;tetracycline ;peptide ;acridine dye;rifamycin ;pleuromutilin ;nitroimidazole	efflux
ARO:3002881	ABX00624.1	lmrC	Streptomyces lincolnensis	EU124663.1	ABC-F ATP-binding cassette ribosomal protection protein	macrolide ;lincosamide ;streptogramin ;tetracycline ;oxazolidinone ;phenicol ;pleuromutilin	target protection
ARO:3002882	AYV52072.1	lmrD	Lactococcus lactis	CP033607.1	ATP-binding cassette (ABC) efflux pump	macrolide ;fluoroquinolone ;lincosamide ;cephalosporin;penam;tetracycline ;peptide ;acridine dye;rifamycin ;pleuromutilin ;nitroimidazole	efflux
ARO:3003969	ABF33001.1	lmrP	Streptococcus pyogenes MGAS9429	CP000259.1	major facilitator superfamily (MFS) efflux pump	macrolide ;fluoroquinolone ;lincosamide ;fosfomycin;streptogramin ;cephalosporin;glycylcycline;bicyclomycin;penam;nucleoside ;tetracycline ;peptide ;acridine dye;oxazolidinone ;rifamycin ;diaminopyrimidine ;phenicol ;isoniazid;benzalkonium chloride;rhodamine;antibacterial free fatty acids;nitroimidazole	efflux
ARO:3002835	AAA26652.1	lnuA	Staphylococcus haemolyticus	M14039.1	lincosamide nucleotidyltransferase (LNU)	lincosamide	inactivation
ARO:3002837	AAY32951.1	lnuC	Streptococcus agalactiae	AY928180	lincosamide nucleotidyltransferase (LNU)	lincosamide	inactivation
ARO:3002838	ABR14060.1	lnuD	Streptococcus uberis	EF452177	lincosamide nucleotidyltransferase (LNU)	lincosamide	inactivation
ARO:3002839	CAD91132.1	lnuF	Escherichia coli	AJ561197	lincosamide nucleotidyltransferase (LNU)	lincosamide	inactivation
ARO:3004085	APU52409.1	lnuG	Enterococcus faecalis	KX470419.1	lincosamide nucleotidyltransferase (LNU)	lincosamide	inactivation
ARO:3004601	ACS83559.1	LnuP	Clostridium perfringens	FJ589781.1	lincosamide nucleotidyltransferase (LNU)	lincosamide	inactivation
ARO:3004099	CAH14032.1	LpeA	Legionella pneumophila str. Paris	CR628336.1	resistance-nodulation-cell division (RND) efflux pump	macrolide ;fluoroquinolone ;monobactam;aminoglycoside ;carbapenem;glycylcycline;penam;tetracycline ;acridine dye;aminocoumarin ;diaminopyrimidine ;phenicol ;triclosan;antibacterial free fatty acids	efflux
ARO:3004100	CAH14033.1	LpeB	Legionella pneumophila str. Paris	CR628336.1	resistance-nodulation-cell division (RND) efflux pump	macrolide ;fluoroquinolone ;monobactam;aminoglycoside ;carbapenem;glycylcycline;penam;tetracycline ;acridine dye;aminocoumarin ;diaminopyrimidine ;phenicol ;triclosan;antibacterial free fatty acids	efflux
ARO:3003573	AJF82049.1	LpxA	Acinetobacter baumannii	CP010781.1	Acinetobacter mutant Lpx gene conferring resistance to colistin	peptide	target alteration
ARO:3003574	AJF83452.1	LpxC	Acinetobacter baumannii	CP010781.1	Acinetobacter mutant Lpx gene conferring resistance to colistin	peptide	target alteration
ARO:3002482	ACH58980.1	LRA-1	uncultured bacterium BLR1	EU408346.1	class A LRA beta-lactamase	cephalosporin;penam	inactivation
ARO:3002489	ACH58999.1	LRA-10	uncultured bacterium BLR10	EU408357.1	class C LRA beta-lactamase	cephalosporin;penam	inactivation
ARO:3002511	ACH58990.1	LRA-12	uncultured bacterium BLR12	EU408351	subclass B3 LRA beta-lactamase	cephalosporin;penam	inactivation
ARO:3002484	ACH58991.1	LRA-13	uncultured bacterium BLR13	EU408352.1	class C LRA beta-lactamase;class D LRA beta-lactamase	cephalosporin;penam	inactivation
ARO:3002512	ACH58994.1	LRA-17	uncultured bacterium BLR17	EU408354.1	subclass B3 LRA beta-lactamase	cephalosporin;penam	inactivation
ARO:3002492	ACH58997.1	LRA-18	uncultured bacterium BLR18	EU408355	class C LRA beta-lactamase	cephalosporin;penam	inactivation
ARO:3002513	ACH59005.1	LRA-19	uncultured bacterium BLR19	EU408359	subclass B3 LRA beta-lactamase	cephalosporin;penam	inactivation
ARO:3002485	ACH58985.1	LRA-2	uncultured bacterium BLR2	EU408347.1	subclass B3 LRA beta-lactamase	cephalosporin;penam	inactivation
ARO:3002510	ACH58987.1	LRA-3	uncultured bacterium BLR3	EU408348	subclass B3 LRA beta-lactamase	cephalosporin;penam	inactivation
ARO:3002483	ACH59002.1	LRA-5	uncultured bacterium BLR5	EU408358	class A LRA beta-lactamase	cephalosporin;penam	inactivation
ARO:3002486	ACH58998.1	LRA-7	uncultured bacterium BLR7	EU408356.1	subclass B3 LRA beta-lactamase	cephalosporin;penam	inactivation
ARO:3002487	ACH58988.1	LRA-8	uncultured bacterium BLR8	EU408349	subclass B3 LRA beta-lactamase	cephalosporin;penam	inactivation
ARO:3002488	ACH58989.1	LRA-9	uncultured bacterium BLR9	EU408350.1	subclass B3 LRA beta-lactamase	cephalosporin;penam	inactivation
ARO:3003967	AAC43550.1	lrfA	Mycolicibacterium smegmatis MC2 155	U40487.1	major facilitator superfamily (MFS) efflux pump	macrolide ;fluoroquinolone ;lincosamide ;fosfomycin;cephalosporin;glycylcycline;bicyclomycin;penam;nucleoside ;tetracycline ;peptide ;acridine dye;oxazolidinone ;rifamycin ;diaminopyrimidine ;phenicol ;isoniazid;benzalkonium chloride;rhodamine;antibacterial free fatty acids;nitroimidazole	efflux
ARO:3000300	AAO43110.1	lsaA	Enterococcus faecalis ATCC 29212	AY225127.1	ABC-F ATP-binding cassette ribosomal protection protein	macrolide ;lincosamide ;streptogramin ;tetracycline ;oxazolidinone ;phenicol ;pleuromutilin	target protection
ARO:3003111	CAE18141.1	lsaB	Staphylococcus sciuri	AJ579365.1	ABC-F ATP-binding cassette ribosomal protection protein	macrolide ;lincosamide ;streptogramin ;tetracycline ;oxazolidinone ;phenicol ;pleuromutilin	target protection
ARO:3003112	AEA37904.1	lsaC	Streptococcus agalactiae	HM990671	ABC-F ATP-binding cassette ribosomal protection protein	macrolide ;lincosamide ;streptogramin ;tetracycline ;oxazolidinone ;phenicol ;pleuromutilin	target protection
ARO:3000533	AAV85981.1	macA	Neisseria gonorrhoeae	AY768531	ATP-binding cassette (ABC) efflux pump	macrolide ;fluoroquinolone ;cephalosporin;penam;tetracycline ;peptide ;acridine dye;rifamycin ;pleuromutilin ;nitroimidazole	efflux
ARO:3000535	AAV85982.1	macB	Neisseria gonorrhoeae	AY768532	ATP-binding cassette (ABC) efflux pump	macrolide ;fluoroquinolone ;cephalosporin;penam;tetracycline ;peptide ;acridine dye;rifamycin ;pleuromutilin ;nitroimidazole	efflux
ARO:3000263	BAA15221.2	marA	Escherichia coli str. K-12 substr. W3110	AP009048.1	resistance-nodulation-cell division (RND) efflux pump;General Bacterial Porin with reduced permeability to beta-lactams	macrolide ;fluoroquinolone ;monobactam;aminoglycoside ;carbapenem;cephalosporin;glycylcycline;cephamycin;penam;tetracycline ;acridine dye;aminocoumarin ;rifamycin ;diaminopyrimidine ;phenicol ;triclosan;penem;antibacterial free fatty acids	efflux;reduced permeability to
ARO:3004506	ASK49940.1	MCR-1.10	Moraxella sp. MSG13-C03	MF176238.1	MCR phosphoethanolamine transferase	peptide	target alteration
ARO:3004689	BBB21811.1	MCR-1.12	Escherichia coli	LC337668.1	MCR phosphoethanolamine transferase	peptide	target alteration
ARO:3004194	ANR95875.1	MCR-1.2	Klebsiella pneumoniae	KX236309.1	MCR phosphoethanolamine transferase	peptide	target alteration
ARO:3004514	ANJ15621.1	MCR-1.3	Escherichia coli	KU934208.1	MCR phosphoethanolamine transferase	peptide	target alteration
ARO:3004685	APM84488.1	MCR-1.5	Escherichia coli	KY283125.1	MCR phosphoethanolamine transferase	peptide	target alteration
ARO:3004686	AQQ11622.1	MCR-1.7	Escherichia coli	KY488488.1	MCR phosphoethanolamine transferase	peptide	target alteration
ARO:3004507	AVA31022.1	MCR-1.9	Escherichia coli	KY780959.1	MCR phosphoethanolamine transferase	peptide	target alteration
ARO:3004110	SBV31106.1	MCR-2	Escherichia coli	LT598652.1	MCR phosphoethanolamine transferase	peptide	target alteration
ARO:3004502	ASK49941.1	MCR-2.2	Moraxella pluranimalium	MF176239.1	MCR phosphoethanolamine transferase	peptide	target alteration
ARO:3004139	ASF81896.1	MCR-3	Escherichia coli	KY924928.1	MCR phosphoethanolamine transferase	peptide	target alteration
ARO:3004504	ATQ63376.1	MCR-3.10	Aeromonas caviae	MG214531.1	MCR phosphoethanolamine transferase	peptide	target alteration
ARO:3004500	AUN87920.1	MCR-3.11	Escherichia coli	MG489958.1	MCR phosphoethanolamine transferase	peptide	target alteration
ARO:3004693	AVZ47168.1	MCR-3.12	Escherichia coli	MG564491.1	MCR phosphoethanolamine transferase	peptide	target alteration
ARO:3004511	OYN70668.1	MCR-3.2	Escherichia coli	NMWW01000143.1	MCR phosphoethanolamine transferase	peptide	target alteration
ARO:3004691	SBZ31568.1	MCR-3.4	Klebsiella pneumoniae	FLXA01000011.1	MCR phosphoethanolamine transferase	peptide	target alteration
ARO:3004505	ASU04896.1	MCR-3.5	Escherichia coli	MF489760.1	MCR phosphoethanolamine transferase	peptide	target alteration
ARO:3004503	AST36140.1	MCR-3.6	Aeromonas allosaccharophila	MF598076.1	MCR phosphoethanolamine transferase	peptide	target alteration
ARO:3004510	AST36141.1	MCR-3.7	Aeromonas media	MF598077.1	MCR phosphoethanolamine transferase	peptide	target alteration
ARO:3004509	AST36143.1	MCR-3.8	Aeromonas hydrophila	MF598079.1	MCR phosphoethanolamine transferase	peptide	target alteration
ARO:3004508	AST36144.1	MCR-3.9	Aeromonas hydrophila	MF598080.1	MCR phosphoethanolamine transferase	peptide	target alteration
ARO:3004325	ASR73329.1	MCR-4	Salmonella sp.	MF543359.1	MCR phosphoethanolamine transferase	peptide	target alteration
ARO:3004694	AVK94777.1	MCR-4.2	Escherichia coli	MG822663.1	MCR phosphoethanolamine transferase	peptide	target alteration
ARO:3004695	AUI38915.1	MCR-4.3	Enterobacter cloacae	MG026621.1	MCR phosphoethanolamine transferase	peptide	target alteration
ARO:3004696	AVK94779.1	MCR-4.4	Escherichia coli	MG822665.1	MCR phosphoethanolamine transferase	peptide	target alteration
ARO:3004697	AVK94778.1	MCR-4.5	Escherichia coli	MG822664.1	MCR phosphoethanolamine transferase	peptide	target alteration
ARO:3004332	ASK40551.1	MCR-5	Salmonella enterica subsp. enterica serovar Paratyphi B	KY807920.1	MCR phosphoethanolamine transferase	peptide	target alteration
ARO:3004698	AVM85875.1	MCR-5.2	Escherichia coli	MG384740.1	MCR phosphoethanolamine transferase	peptide	target alteration
ARO:3004501	ASK49942.1	MCR-6.1	Moraxella sp. MSG47-C17	MF176240.1	MCR phosphoethanolamine transferase	peptide	target alteration
ARO:3004517	AUR80098.1	MCR-7.1	Klebsiella pneumoniae	MG267386.1	MCR phosphoethanolamine transferase	peptide	target alteration
ARO:3004516	AVX52225.1	MCR-8	Klebsiella pneumoniae	MG736312.1	MCR phosphoethanolamine transferase	peptide	target alteration
ARO:3004684	WP_001572373.1	MCR-9	Enterobacteriales	NC_021819.1	MCR phosphoethanolamine transferase	peptide	target alteration
ARO:3000789	AAL19306.1	mdsA	Salmonella enterica subsp. enterica serovar Typhimurium str. LT2	AE006468.2	resistance-nodulation-cell division (RND) efflux pump	macrolide ;fluoroquinolone ;monobactam;aminoglycoside ;carbapenem;cephalosporin;glycylcycline;cephamycin;penam;tetracycline ;acridine dye;aminocoumarin ;diaminopyrimidine ;phenicol ;triclosan;penem;antibacterial free fatty acids	efflux
ARO:3000790	AAL19305.1	mdsB	Salmonella enterica subsp. enterica serovar Typhimurium str. LT2	AE006468.2	resistance-nodulation-cell division (RND) efflux pump	macrolide ;fluoroquinolone ;monobactam;aminoglycoside ;carbapenem;cephalosporin;glycylcycline;cephamycin;penam;tetracycline ;acridine dye;aminocoumarin ;diaminopyrimidine ;phenicol ;triclosan;penem;antibacterial free fatty acids	efflux
ARO:3000791	AAL19304.1	mdsC	Salmonella enterica subsp. enterica serovar Typhimurium str. LT2	AE006468.2	resistance-nodulation-cell division (RND) efflux pump	macrolide ;fluoroquinolone ;monobactam;aminoglycoside ;carbapenem;cephalosporin;glycylcycline;cephamycin;penam;tetracycline ;acridine dye;aminocoumarin ;diaminopyrimidine ;phenicol ;triclosan;penem;antibacterial free fatty acids	efflux
ARO:3000792	AAC75135.2	mdtA	Escherichia coli str. K-12 substr. MG1655	U00096	resistance-nodulation-cell division (RND) efflux pump	macrolide ;fluoroquinolone ;monobactam;aminoglycoside ;carbapenem;glycylcycline;penam;tetracycline ;acridine dye;aminocoumarin ;diaminopyrimidine ;phenicol ;triclosan;antibacterial free fatty acids	efflux
ARO:3000793	AAC75136.1	mdtB	Escherichia coli str. K-12 substr. MG1655	U00096	resistance-nodulation-cell division (RND) efflux pump	macrolide ;fluoroquinolone ;monobactam;aminoglycoside ;carbapenem;glycylcycline;penam;tetracycline ;acridine dye;aminocoumarin ;diaminopyrimidine ;phenicol ;triclosan;antibacterial free fatty acids	efflux
ARO:3000794	AAC75137.1	mdtC	Escherichia coli str. K-12 substr. MG1655	U00096	resistance-nodulation-cell division (RND) efflux pump	macrolide ;fluoroquinolone ;monobactam;aminoglycoside ;carbapenem;glycylcycline;penam;tetracycline ;acridine dye;aminocoumarin ;diaminopyrimidine ;phenicol ;triclosan;antibacterial free fatty acids	efflux
ARO:3000795	BAE77781.1	mdtE	Escherichia coli str. K-12 substr. W3110	AP009048.1	resistance-nodulation-cell division (RND) efflux pump	macrolide ;fluoroquinolone ;monobactam;aminoglycoside ;carbapenem;glycylcycline;penam;tetracycline ;acridine dye;aminocoumarin ;diaminopyrimidine ;phenicol ;triclosan;antibacterial free fatty acids	efflux
ARO:3000796	AAC76539.1	mdtF	Escherichia coli str. K-12 substr. MG1655	U00096	resistance-nodulation-cell division (RND) efflux pump	macrolide ;fluoroquinolone ;monobactam;aminoglycoside ;carbapenem;glycylcycline;penam;tetracycline ;acridine dye;aminocoumarin ;diaminopyrimidine ;phenicol ;triclosan;antibacterial free fatty acids	efflux
ARO:3001329	ABV18113.1	mdtG	Escherichia coli O139:H28 str. E24377A	CP000800.1	major facilitator superfamily (MFS) efflux pump	macrolide ;fluoroquinolone ;lincosamide ;fosfomycin;cephalosporin;glycylcycline;bicyclomycin;penam;nucleoside ;tetracycline ;peptide ;acridine dye;oxazolidinone ;rifamycin ;diaminopyrimidine ;phenicol ;isoniazid;benzalkonium chloride;rhodamine;antibacterial free fatty acids;nitroimidazole	efflux
ARO:3001216	AAC74149.2	mdtH	Escherichia coli str. K-12 substr. MG1655	U00096	major facilitator superfamily (MFS) efflux pump	macrolide ;fluoroquinolone ;lincosamide ;fosfomycin;cephalosporin;glycylcycline;bicyclomycin;penam;nucleoside ;tetracycline ;peptide ;acridine dye;oxazolidinone ;rifamycin ;diaminopyrimidine ;phenicol ;isoniazid;benzalkonium chloride;rhodamine;antibacterial free fatty acids;nitroimidazole	efflux
ARO:3001327	AML99881.1	mdtK	Salmonella enterica subsp. enterica serovar Typhimurium	CP014358.1	multidrug and toxic compound extrusion (MATE) transporter	fluoroquinolone ;glycylcycline;tetracycline ;acridine dye	efflux
ARO:3001214	AAC77293.1	mdtM	Escherichia coli str. K-12 substr. MG1655	U00096.3	major facilitator superfamily (MFS) efflux pump	macrolide ;fluoroquinolone ;lincosamide ;fosfomycin;cephalosporin;glycylcycline;bicyclomycin;penam;nucleoside ;tetracycline ;peptide ;acridine dye;oxazolidinone ;rifamycin ;diaminopyrimidine ;phenicol ;isoniazid;benzalkonium chloride;rhodamine;antibacterial free fatty acids;nitroimidazole	efflux
ARO:3003548	BAE78084.1	mdtN	Escherichia coli str. K-12 substr. W3110	AP009048.1	major facilitator superfamily (MFS) efflux pump	macrolide ;fluoroquinolone ;lincosamide ;fosfomycin;cephalosporin;glycylcycline;bicyclomycin;penam;nucleoside ;tetracycline ;peptide ;acridine dye;oxazolidinone ;rifamycin ;diaminopyrimidine ;phenicol ;isoniazid;benzalkonium chloride;rhodamine;antibacterial free fatty acids;nitroimidazole	efflux
ARO:3003549	BAE78083.1	mdtO	Escherichia coli str. K-12 substr. W3110	AP009048.1	major facilitator superfamily (MFS) efflux pump	macrolide ;fluoroquinolone ;lincosamide ;fosfomycin;cephalosporin;glycylcycline;bicyclomycin;penam;nucleoside ;tetracycline ;peptide ;acridine dye;oxazolidinone ;rifamycin ;diaminopyrimidine ;phenicol ;isoniazid;benzalkonium chloride;rhodamine;antibacterial free fatty acids;nitroimidazole	efflux
ARO:3003550	BAE78082.1	mdtP	Escherichia coli str. K-12 substr. W3110	AP009048.1	major facilitator superfamily (MFS) efflux pump	macrolide ;fluoroquinolone ;lincosamide ;fosfomycin;cephalosporin;glycylcycline;bicyclomycin;penam;nucleoside ;tetracycline ;peptide ;acridine dye;oxazolidinone ;rifamycin ;diaminopyrimidine ;phenicol ;isoniazid;benzalkonium chloride;rhodamine;antibacterial free fatty acids;nitroimidazole	efflux
ARO:3000617	AGC51118.1	mecA	Staphylococcus aureus	KC243783	methicillin resistant PBP2	monobactam;carbapenem;cephalosporin;cephamycin;penam	target replacement
ARO:3003440	BAI83385.1	mecB	Macrococcus caseolyticus	AB498758	methicillin resistant PBP2	monobactam;carbapenem;cephalosporin;cephamycin;penam	target replacement
ARO:3001209	CCC86795.1	mecC	Staphylococcus aureus subsp. aureus LGA251	FR821779.1	methicillin resistant PBP2	monobactam;carbapenem;cephalosporin;cephamycin;penam	target replacement
ARO:3004185	AQX82857.1	mecD	Macrococcus caseolyticus	KY013611.1	methicillin resistant PBP2	monobactam;carbapenem;cephalosporin;cephamycin;penam	target replacement
ARO:3000124	BAB41258.1	mecI	Staphylococcus aureus subsp. aureus N315	BA000018.3	methicillin resistant PBP2	monobactam;carbapenem;cephalosporin;cephamycin;penam	target replacement
ARO:3000215	ABQ47844.1	mecR1	Staphylococcus aureus subsp. aureus JH9	CP000703.1	methicillin resistant PBP2	monobactam;carbapenem;cephalosporin;cephamycin;penam	target replacement
ARO:3004659	AAF74725.1	Mef(En2)	Bacteroides fragilis	AF251288.1	major facilitator superfamily (MFS) efflux pump	macrolide ;fluoroquinolone ;lincosamide ;fosfomycin;cephalosporin;glycylcycline;bicyclomycin;penam;nucleoside ;tetracycline ;peptide ;acridine dye;oxazolidinone ;rifamycin ;diaminopyrimidine ;phenicol ;isoniazid;benzalkonium chloride;rhodamine;antibacterial free fatty acids;nitroimidazole	efflux
ARO:3003107	ACJ63262.1	mefB	Escherichia coli	FJ196385.1	major facilitator superfamily (MFS) efflux pump	macrolide ;fluoroquinolone ;lincosamide ;fosfomycin;cephalosporin;glycylcycline;bicyclomycin;penam;nucleoside ;tetracycline ;peptide ;acridine dye;oxazolidinone ;rifamycin ;diaminopyrimidine ;phenicol ;isoniazid;benzalkonium chloride;rhodamine;antibacterial free fatty acids;nitroimidazole	efflux
ARO:3003745	BAL43360.1	mefC	Photobacterium damselae subsp. damselae	AB571865.1	major facilitator superfamily (MFS) efflux pump	macrolide ;fluoroquinolone ;lincosamide ;fosfomycin;cephalosporin;glycylcycline;bicyclomycin;penam;nucleoside ;tetracycline ;peptide ;acridine dye;oxazolidinone ;rifamycin ;diaminopyrimidine ;phenicol ;isoniazid;benzalkonium chloride;rhodamine;antibacterial free fatty acids;nitroimidazole	efflux
ARO:3000614	AAK99775.1	mefE	Streptococcus pneumoniae R6	AE007317.1	major facilitator superfamily (MFS) efflux pump	macrolide ;fluoroquinolone ;lincosamide ;fosfomycin;cephalosporin;glycylcycline;bicyclomycin;penam;nucleoside ;tetracycline ;peptide ;acridine dye;oxazolidinone ;rifamycin ;diaminopyrimidine ;phenicol ;isoniazid;benzalkonium chloride;rhodamine;antibacterial free fatty acids;nitroimidazole	efflux
ARO:3000616	AAL73129.1	mel	Streptococcus pyogenes	AF227521.1	ABC-F ATP-binding cassette ribosomal protection protein	macrolide ;lincosamide ;streptogramin ;tetracycline ;oxazolidinone ;phenicol ;pleuromutilin	target protection
ARO:3000026	AAU95768.1	mepA	Staphylococcus aureus	AY661734.1	multidrug and toxic compound extrusion (MATE) transporter	fluoroquinolone ;glycylcycline;tetracycline ;acridine dye	efflux
ARO:3000746	BAB56495.1	mepR	Staphylococcus aureus subsp. aureus Mu50	BA000017.4	multidrug and toxic compound extrusion (MATE) transporter	fluoroquinolone ;glycylcycline;tetracycline ;acridine dye	efflux
ARO:3000377	NP_249116.1	MexA	Pseudomonas aeruginosa PAO1	NC_002516	resistance-nodulation-cell division (RND) efflux pump	macrolide ;fluoroquinolone ;monobactam;aminoglycoside ;carbapenem;cephalosporin;glycylcycline;cephamycin;penam;tetracycline ;peptide ;acridine dye;aminocoumarin ;diaminopyrimidine ;sulfonamide ;phenicol ;triclosan;penem;antibacterial free fatty acids	efflux
ARO:3000378	AAA74437.1	MexB	Pseudomonas aeruginosa	L11616	resistance-nodulation-cell division (RND) efflux pump	macrolide ;fluoroquinolone ;monobactam;aminoglycoside ;carbapenem;cephalosporin;glycylcycline;cephamycin;penam;tetracycline ;peptide ;acridine dye;aminocoumarin ;diaminopyrimidine ;sulfonamide ;phenicol ;triclosan;penem;antibacterial free fatty acids	efflux
ARO:3000800	AAB41956.1	MexC	Pseudomonas aeruginosa	U57969	resistance-nodulation-cell division (RND) efflux pump	macrolide ;fluoroquinolone ;monobactam;aminoglycoside ;carbapenem;cephalosporin;glycylcycline;penam;tetracycline ;acridine dye;aminocoumarin ;diaminopyrimidine ;phenicol ;triclosan;antibacterial free fatty acids	efflux
ARO:3000801	AAB41957.1	MexD	Pseudomonas aeruginosa	U57969	resistance-nodulation-cell division (RND) efflux pump	macrolide ;fluoroquinolone ;monobactam;aminoglycoside ;carbapenem;cephalosporin;glycylcycline;penam;tetracycline ;acridine dye;aminocoumarin ;diaminopyrimidine ;phenicol ;triclosan;antibacterial free fatty acids	efflux
ARO:3000803	AAG05881.1	MexE	Pseudomonas aeruginosa PAO1	AE004091.2	resistance-nodulation-cell division (RND) efflux pump	macrolide ;fluoroquinolone ;monobactam;aminoglycoside ;carbapenem;glycylcycline;penam;tetracycline ;acridine dye;aminocoumarin ;diaminopyrimidine ;phenicol ;triclosan;antibacterial free fatty acids	efflux
ARO:3000804	AAG05882.1	MexF	Pseudomonas aeruginosa PAO1	AE004091.2	resistance-nodulation-cell division (RND) efflux pump	macrolide ;fluoroquinolone ;monobactam;aminoglycoside ;carbapenem;glycylcycline;penam;tetracycline ;acridine dye;aminocoumarin ;diaminopyrimidine ;phenicol ;triclosan;antibacterial free fatty acids	efflux
ARO:3000806	AAG07592.1	mexG	Pseudomonas aeruginosa PAO1	AE004091.2	resistance-nodulation-cell division (RND) efflux pump	macrolide ;fluoroquinolone ;monobactam;aminoglycoside ;carbapenem;glycylcycline;penam;tetracycline ;acridine dye;aminocoumarin ;diaminopyrimidine ;phenicol ;triclosan;antibacterial free fatty acids	efflux
ARO:3000807	AAG07593.1	mexH	Pseudomonas aeruginosa PAO1	AE004091.2	resistance-nodulation-cell division (RND) efflux pump	macrolide ;fluoroquinolone ;monobactam;aminoglycoside ;carbapenem;glycylcycline;penam;tetracycline ;acridine dye;aminocoumarin ;diaminopyrimidine ;phenicol ;triclosan;antibacterial free fatty acids	efflux
ARO:3003692	AAG07065.1	mexJ	Pseudomonas aeruginosa PAO1	AE004091.2	resistance-nodulation-cell division (RND) efflux pump	macrolide ;fluoroquinolone ;monobactam;aminoglycoside ;carbapenem;glycylcycline;penam;tetracycline ;acridine dye;aminocoumarin ;diaminopyrimidine ;phenicol ;triclosan;antibacterial free fatty acids	efflux
ARO:3003693	AAG07064.1	mexK	Pseudomonas aeruginosa PAO1	AE004091.2	resistance-nodulation-cell division (RND) efflux pump	macrolide ;fluoroquinolone ;monobactam;aminoglycoside ;carbapenem;glycylcycline;penam;tetracycline ;acridine dye;aminocoumarin ;diaminopyrimidine ;phenicol ;triclosan;antibacterial free fatty acids	efflux
ARO:3003710	AAG07066.1	mexL	Pseudomonas aeruginosa PAO1	AE004091.2	resistance-nodulation-cell division (RND) efflux pump	macrolide ;fluoroquinolone ;monobactam;aminoglycoside ;carbapenem;glycylcycline;penam;tetracycline ;acridine dye;aminocoumarin ;diaminopyrimidine ;phenicol ;triclosan;antibacterial free fatty acids	efflux
ARO:3003704	BAE06005.1	mexM	Pseudomonas aeruginosa	AB219523.1	resistance-nodulation-cell division (RND) efflux pump	macrolide ;fluoroquinolone ;monobactam;aminoglycoside ;carbapenem;glycylcycline;penam;tetracycline ;acridine dye;aminocoumarin ;diaminopyrimidine ;phenicol ;triclosan;antibacterial free fatty acids	efflux
ARO:3003705	BAE06006.1	mexN	Pseudomonas aeruginosa	AB219523.1	resistance-nodulation-cell division (RND) efflux pump	macrolide ;fluoroquinolone ;monobactam;aminoglycoside ;carbapenem;glycylcycline;penam;tetracycline ;acridine dye;aminocoumarin ;diaminopyrimidine ;phenicol ;triclosan;antibacterial free fatty acids	efflux
ARO:3003698	BAE06007.1	mexP	Pseudomonas aeruginosa	AB219524.1	resistance-nodulation-cell division (RND) efflux pump	macrolide ;fluoroquinolone ;monobactam;aminoglycoside ;carbapenem;glycylcycline;penam;tetracycline ;acridine dye;aminocoumarin ;diaminopyrimidine ;phenicol ;triclosan;antibacterial free fatty acids	efflux
ARO:3003699	BAE06008.1	mexQ	Pseudomonas aeruginosa	AB219524.1	resistance-nodulation-cell division (RND) efflux pump	macrolide ;fluoroquinolone ;monobactam;aminoglycoside ;carbapenem;glycylcycline;penam;tetracycline ;acridine dye;aminocoumarin ;diaminopyrimidine ;phenicol ;triclosan;antibacterial free fatty acids	efflux
ARO:3000506	AAG03813.1	mexR	Pseudomonas aeruginosa PAO1	AE004091.2	resistance-nodulation-cell division (RND) efflux pump	macrolide ;fluoroquinolone ;monobactam;aminoglycoside ;carbapenem;cephalosporin;glycylcycline;cephamycin;penam;tetracycline ;peptide ;acridine dye;aminocoumarin ;diaminopyrimidine ;sulfonamide ;phenicol ;triclosan;penem;antibacterial free fatty acids	target alteration; efflux
ARO:3000813	ADT64081.1	MexS	Pseudomonas aeruginosa PAK	HQ433550	resistance-nodulation-cell division (RND) efflux pump	macrolide ;fluoroquinolone ;monobactam;aminoglycoside ;carbapenem;glycylcycline;penam;tetracycline ;acridine dye;aminocoumarin ;diaminopyrimidine ;phenicol ;triclosan;antibacterial free fatty acids	efflux
ARO:3000814	AAG05880.1	MexT	Pseudomonas aeruginosa PAO1	AE004091.2	resistance-nodulation-cell division (RND) efflux pump	macrolide ;fluoroquinolone ;monobactam;aminoglycoside ;carbapenem;glycylcycline;penam;tetracycline ;acridine dye;aminocoumarin ;diaminopyrimidine ;phenicol ;triclosan;antibacterial free fatty acids	efflux
ARO:3003030	AAG07762.1	mexV	Pseudomonas aeruginosa PAO1	AE004091.2	resistance-nodulation-cell division (RND) efflux pump	macrolide ;fluoroquinolone ;monobactam;aminoglycoside ;carbapenem;glycylcycline;penam;tetracycline ;acridine dye;aminocoumarin ;diaminopyrimidine ;phenicol ;triclosan;antibacterial free fatty acids	efflux
ARO:3003031	AAG07763.1	mexW	Pseudomonas aeruginosa PAO1	NC_002516.2	resistance-nodulation-cell division (RND) efflux pump	macrolide ;fluoroquinolone ;monobactam;aminoglycoside ;carbapenem;glycylcycline;penam;tetracycline ;acridine dye;aminocoumarin ;diaminopyrimidine ;phenicol ;triclosan;antibacterial free fatty acids	efflux
ARO:3003034	BAA34299.1	mexX	Pseudomonas aeruginosa PAO1	AB015853	resistance-nodulation-cell division (RND) efflux pump	macrolide ;fluoroquinolone ;monobactam;aminoglycoside ;carbapenem;cephalosporin;glycylcycline;cephamycin;penam;tetracycline ;acridine dye;aminocoumarin ;diaminopyrimidine ;phenicol ;triclosan;antibacterial free fatty acids	efflux
ARO:3003033	BAA34300.1	mexY	Pseudomonas aeruginosa PAO1	AB015853	resistance-nodulation-cell division (RND) efflux pump	macrolide ;fluoroquinolone ;monobactam;aminoglycoside ;carbapenem;cephalosporin;glycylcycline;cephamycin;penam;tetracycline ;acridine dye;aminocoumarin ;diaminopyrimidine ;phenicol ;triclosan;antibacterial free fatty acids	efflux
ARO:3003709	AAG05408.1	mexZ	Pseudomonas aeruginosa PAO1	AE004091.2	resistance-nodulation-cell division (RND) efflux pump	macrolide ;fluoroquinolone ;monobactam;aminoglycoside ;carbapenem;cephalosporin;glycylcycline;cephamycin;penam;tetracycline ;acridine dye;aminocoumarin ;diaminopyrimidine ;phenicol ;triclosan;antibacterial free fatty acids	efflux
ARO:3003035	CCP46182.1	mfpA	Mycobacterium tuberculosis H37Rv	AL123456	quinolone resistance protein (qnr)	fluoroquinolone	target protection
ARO:3000815	BAB41874.1	mgrA	Staphylococcus aureus subsp. aureus N315	BA000018.3	ATP-binding cassette (ABC) efflux pump;major facilitator superfamily (MFS) efflux pump	macrolide ;fluoroquinolone ;lincosamide ;fosfomycin;cephalosporin;glycylcycline;bicyclomycin;penam;nucleoside ;tetracycline ;peptide ;acridine dye;oxazolidinone ;rifamycin ;diaminopyrimidine ;phenicol ;isoniazid;pleuromutilin ;benzalkonium chloride;rhodamine;antibacterial free fatty acids;nitroimidazole	efflux
ARO:3000462	ABA28305.2	mgtA	Streptomyces lividans	DQ185434	mgt macrolide glycotransferase	macrolide	inactivation
ARO:3002166	AAD22636.1	MIR-1	Klebsiella pneumoniae	M37839	MIR beta-lactamase	monobactam;cephalosporin	inactivation
ARO:3002175	AIT76111.1	MIR-10	Enterobacter asburiae	KM087858	MIR beta-lactamase	monobactam;cephalosporin	inactivation
ARO:3002177	AIT76116.1	MIR-12	Enterobacter cloacae	KM087863	MIR beta-lactamase	monobactam;cephalosporin	inactivation
ARO:3002180	AIT76104.1	MIR-15	Enterobacter kobei	KM087851	MIR beta-lactamase	monobactam;cephalosporin	inactivation
ARO:3002167	ABN69112.2	MIR-4	Escherichia coli	EF417572	MIR beta-lactamase	monobactam;cephalosporin	inactivation
ARO:3002170	AJO16037.1	MIR-5	Enterobacter asburiae	KP050484	MIR beta-lactamase	monobactam;cephalosporin	inactivation
ARO:3002174	AIT76113.1	MIR-9	Enterobacter asburiae	KM087860	MIR beta-lactamase	monobactam;cephalosporin	inactivation
ARO:3004124	AAX99225	Moraxella catarrhalis M35	Moraxella catarrhalis	AY905613	General Bacterial Porin with reduced permeability to beta-lactams	monobactam;carbapenem;cephalosporin;cephamycin;penam;penem	reduced permeability to ;resistance by absence
ARO:3003306	AGG29535.1	Morganella morganii gyrB conferring resistance to fluoroquinolone	Morganella morganii subsp. morganii KT	CP004345.1	fluoroquinolone resistant gyrB	fluoroquinolone ;aminocoumarin	target alteration
ARO:3002182	BAA02563.2	MOX-1	Klebsiella pneumoniae	D13304	MOX beta-lactamase	cephalosporin;cephamycin;penam	inactivation
ARO:3002183	CAB82578.1	MOX-2	Klebsiella pneumoniae	AJ276453	MOX beta-lactamase	cephalosporin;cephamycin;penam	inactivation
ARO:3002186	ACA30419.1	MOX-3	Aeromonas sp. HCUZ 2422275	EU515248	MOX beta-lactamase	cephalosporin;cephamycin;penam	inactivation
ARO:3002188	ACS44783.1	MOX-5	Aeromonas caviae	GQ152600	MOX beta-lactamase	cephalosporin;cephamycin;penam	inactivation
ARO:3002185	ACS44784.1	MOX-6	Aeromonas caviae	GQ152601	MOX beta-lactamase	cephalosporin;cephamycin;penam	inactivation
ARO:3002189	ACS44785.1	MOX-7	Aeromonas caviae	GQ152602	MOX beta-lactamase	cephalosporin;cephamycin;penam	inactivation
ARO:3002191	AIG22447.1	MOX-9	Citrobacter freundii	KJ746495.1	MOX beta-lactamase	cephalosporin;cephamycin;penam	inactivation
ARO:3000316	BAA03776.1	mphA	Escherichia coli	D16251.1	macrolide phosphotransferase (MPH)	macrolide	inactivation
ARO:3000318	AAG57600.1	mphB	Escherichia coli O157:H7 str. EDL933	AE005174.2	macrolide phosphotransferase (MPH)	macrolide	inactivation
ARO:3003741	ABI20451.1	mphE	uncultured bacterium	DQ839391.1	macrolide phosphotransferase (MPH)	macrolide	inactivation
ARO:3003071	CAJ98570.1	mphF	uncultured bacterium	AM260957.1	macrolide phosphotransferase (MPH)	macrolide	inactivation
ARO:3003742	BAL43359.1	mphG	Photobacterium damselae subsp. damselae	AB571865.1	macrolide phosphotransferase (MPH)	macrolide	inactivation
ARO:3003991	APB03226.1	mphI	Paenibacillus sp. LC231	KX531056.1	macrolide phosphotransferase (MPH)	macrolide	inactivation
ARO:3004541	AJE92936.1	mphK	Bacillus subtilis subsp. subtilis	CP010314.1	macrolide phosphotransferase (MPH)	macrolide	inactivation
ARO:3004543	WP_050815728.1	mphO	Brachybacterium paraconglomeratum	NZ_AGSO01000004.1	macrolide phosphotransferase (MPH)	macrolide	inactivation
ARO:3003950	AAC74000.1	msbA	Escherichia coli str. K-12 substr. MG1655	U00096.3	ATP-binding cassette (ABC) efflux pump	macrolide ;fluoroquinolone ;cephalosporin;penam;tetracycline ;peptide ;acridine dye;rifamycin ;pleuromutilin ;nitroimidazole	efflux
ARO:3003718	AJP77057	MSI-1	Massilia sp. SB1-3	KP109676	MSI beta-lactamase	carbapenem	inactivation
ARO:3003719	AJP77058	MSI-OXA	Massilia sp. SB1-3	KP109676	MSI-OXA family beta-lactamase	carbapenem	inactivation
ARO:3000251	CAA36304.1	msrA	Staphylococcus epidermidis	X52085.1	ABC-F ATP-binding cassette ribosomal protection protein	macrolide ;lincosamide ;streptogramin ;tetracycline ;oxazolidinone ;phenicol ;pleuromutilin	target protection
ARO:3002819	AAK01167.1	msrC	Enterococcus faecium	AF313494	ABC-F ATP-binding cassette ribosomal protection protein	macrolide ;lincosamide ;streptogramin ;tetracycline ;oxazolidinone ;phenicol ;pleuromutilin	target protection
ARO:3003109	ACB05808.1	msrE	Acinetobacter baumannii	EU294228.1	ABC-F ATP-binding cassette ribosomal protection protein	macrolide ;lincosamide ;streptogramin ;tetracycline ;oxazolidinone ;phenicol ;pleuromutilin	target protection
ARO:3000816	CCP46065.1	mtrA	Mycobacterium tuberculosis H37Rv	AL123456.3	resistance-nodulation-cell division (RND) efflux pump	macrolide ;fluoroquinolone ;monobactam;aminoglycoside ;carbapenem;glycylcycline;penam;tetracycline ;acridine dye;aminocoumarin ;diaminopyrimidine ;phenicol ;triclosan;antibacterial free fatty acids	efflux
ARO:3000810	AAF42063.1	mtrC	Neisseria meningitidis MC58	AE002098.2	resistance-nodulation-cell division (RND) efflux pump	macrolide ;fluoroquinolone ;monobactam;aminoglycoside ;carbapenem;glycylcycline;penam;tetracycline ;acridine dye;aminocoumarin ;diaminopyrimidine ;phenicol ;triclosan;antibacterial free fatty acids	efflux
ARO:3000811	AAF42062.1	mtrD	Neisseria meningitidis MC58	AE002098.2	resistance-nodulation-cell division (RND) efflux pump	macrolide ;fluoroquinolone ;monobactam;aminoglycoside ;carbapenem;glycylcycline;penam;tetracycline ;acridine dye;aminocoumarin ;diaminopyrimidine ;phenicol ;triclosan;antibacterial free fatty acids	efflux
ARO:3000812	CAA64891.1	mtrE	Neisseria gonorrhoeae	X95635	resistance-nodulation-cell division (RND) efflux pump	macrolide ;fluoroquinolone ;monobactam;aminoglycoside ;carbapenem;glycylcycline;penam;tetracycline ;acridine dye;aminocoumarin ;diaminopyrimidine ;phenicol ;triclosan;antibacterial free fatty acids	efflux
ARO:3000817	ACF30254.1	mtrR	Neisseria gonorrhoeae NCCP11945	CP001050.1	major facilitator superfamily (MFS) efflux pump;resistance-nodulation-cell division (RND) efflux pump	macrolide ;fluoroquinolone ;monobactam;aminoglycoside ;lincosamide ;carbapenem;fosfomycin;cephalosporin;glycylcycline;bicyclomycin;penam;nucleoside ;tetracycline ;peptide ;acridine dye;oxazolidinone ;aminocoumarin ;rifamycin ;diaminopyrimidine ;phenicol ;isoniazid;triclosan;benzalkonium chloride;rhodamine;antibacterial free fatty acids;nitroimidazole	efflux
ARO:3000521	CAA53189	mupA	Staphylococcus aureus	X75439	resistant isoleucyl-tRNA synthetase (ileS)	mupirocin	target alteration
ARO:3000510	AEY83581	mupB	Staphylococcus aureus	JQ231224	resistant isoleucyl-tRNA synthetase (ileS)	mupirocin	target alteration
ARO:3000843	AAN63647.1	MUS-1 beta-lactamase	Myroides odoratimimus	AF441286	MUS beta-lactamase	carbapenem	inactivation
ARO:3003842	AKN19901.1	MUS-2 beta-lactamase	Myroides odoratimimus	KP658209.1	MUS beta-lactamase	carbapenem	inactivation
ARO:3004073	AAG05916.1	MuxA	Pseudomonas aeruginosa PAO1	AE004091.2	resistance-nodulation-cell division (RND) efflux pump	macrolide ;fluoroquinolone ;monobactam;aminoglycoside ;carbapenem;glycylcycline;penam;tetracycline ;acridine dye;aminocoumarin ;diaminopyrimidine ;phenicol ;triclosan;antibacterial free fatty acids	efflux
ARO:3004074	AAG05915.1	MuxB	Pseudomonas aeruginosa PAO1	AE004091.2	resistance-nodulation-cell division (RND) efflux pump	macrolide ;fluoroquinolone ;monobactam;aminoglycoside ;carbapenem;glycylcycline;penam;tetracycline ;acridine dye;aminocoumarin ;diaminopyrimidine ;phenicol ;triclosan;antibacterial free fatty acids	efflux
ARO:3004075	AAG05914	MuxC	Pseudomonas aeruginosa PAO1	AE004091.2	resistance-nodulation-cell division (RND) efflux pump	macrolide ;fluoroquinolone ;monobactam;aminoglycoside ;carbapenem;glycylcycline;penam;tetracycline ;acridine dye;aminocoumarin ;diaminopyrimidine ;phenicol ;triclosan;antibacterial free fatty acids	efflux
ARO:3004069	NP_253005.1	MvaT	Pseudomonas aeruginosa PAO1	NC_002516.2	resistance-nodulation-cell division (RND) efflux pump	macrolide ;fluoroquinolone ;monobactam;aminoglycoside ;carbapenem;glycylcycline;penam;tetracycline ;acridine dye;aminocoumarin ;diaminopyrimidine ;phenicol ;triclosan;antibacterial free fatty acids	efflux
ARO:3003389	CAC29732.1	Mycobacterium leprae folP with mutation conferring resistance to dapsone	Mycobacterium leprae TN	AL450380	dapsone resistant dihydropteroate synthase folP	sulfonamide ;sulfone	target alteration
ARO:3003304	CAC29513.1	Mycobacterium leprae gyrB conferring resistance to fluoroquinolone	Mycobacterium leprae TN	AL450380	fluoroquinolone resistant gyrB	fluoroquinolone ;aminocoumarin	target alteration
ARO:3003284	CAC30845.1	Mycobacterium leprae rpoB mutations conferring resistance to rifampicin	Mycobacterium leprae	AL450380	rifamycin-resistant beta-subunit of RNA polymerase (rpoB)	peptide ;rifamycin	target alteration; target replacement
ARO:3003453	AFN51820.1	Mycobacterium tuberculosis embA mutant conferring resistance to ethambutol	Mycobacterium tuberculosis H37Rv	CP003248	ethambutol resistant arabinosyltransferase	polyamine	target alteration
ARO:3003326	CCP46624.1	Mycobacterium tuberculosis embB mutations conferring resistance to ethambutol	Mycobacterium tuberculosis H37Rv	AL123456	ethambutol resistant arabinosyltransferase	polyamine	target alteration
ARO:3003455	CCP44023.1	Mycobacterium tuberculosis embR mutant conferring resistance to ethambutol	Mycobacterium tuberculosis H37Rv	AL123456.3	ethambutol resistant arabinosyltransferase	polyamine	target alteration
ARO:3003458	AAK48336.1	Mycobacterium tuberculosis ethA with mutation conferring resistance to ethionamide	Mycobacterium tuberculosis CDC1551	AE000516.2	ethionamide resistant ethA	isoniazid;ethionamide	target alteration
ARO:3004157	CCP45240.1	Mycobacterium tuberculosis folC with mutation conferring resistance to para-aminosalicylic acid	Mycobacterium tuberculosis H37Rv	AL123456.3	aminosalicylate resistant dihydrofolate synthase	para-aminosalicylic acid	target alteration
ARO:3003470	CCP46748.1	Mycobacterium tuberculosis gidB mutation conferring resistance to streptomycin	Mycobacterium tuberculosis H37Rv	AL123456	resistant gidB	aminoglycoside	target alteration
ARO:3003295	CCP42728.1	Mycobacterium tuberculosis gyrA conferring resistance to fluoroquinolones	Mycobacterium tuberculosis H37Rv	AL123456	fluoroquinolone resistant gyrA	fluoroquinolone ;nybomycin	target alteration
ARO:3003459	CAA55486.1	Mycobacterium tuberculosis gyrB mutant conferring resistance to fluoroquinolone	Mycobacterium tuberculosis H37Ra	NC_009525.1	fluoroquinolone resistant gyrB	fluoroquinolone ;aminocoumarin	target alteration
ARO:3003393	CCP44244.1	Mycobacterium tuberculosis inhA mutations conferring resistance to isoniazid	Mycobacterium tuberculosis H37Rv	AL123456	resistant inhA	isoniazid;triclosan	target alteration
ARO:3003448	CCP43072.1	Mycobacterium tuberculosis iniA mutant conferring resistance to Ethambutol	Mycobacterium tuberculosis H37Rv	AL123456	Ethambutol resistant iniA	polyamine	target alteration; efflux
ARO:3004135	CCP43071.1	Mycobacterium tuberculosis iniB with mutation conferring resistance to ethambutol	Mycobacterium tuberculosis H37Rv	AL123456.3	Ethambutol resistant iniB	polyamine	target alteration; efflux
ARO:3003451	CCP43073.1	Mycobacterium tuberculosis iniC mutant conferring resistance to ethambutol	Mycobacterium tuberculosis H37Rv	AL123456	Ethambutol resistant iniC	polyamine	target alteration; efflux
ARO:3003784	CCE36834	Mycobacterium tuberculosis intrinsic murA conferring resistance to fosfomycin	Mycobacterium tuberculosis UT205	HE608151	murA transferase	fosfomycin	target alteration
ARO:3003463	CCP45025.1	Mycobacterium tuberculosis kasA mutant conferring resistance to isoniazid	Mycobacterium tuberculosis H37Rv	AL123456	resistant kasA	isoniazid;triclosan	target alteration
ARO:3003392	CCP44675.1	Mycobacterium tuberculosis katG mutations conferring resistance to isoniazid	Mycobacterium tuberculosis H37Rv	AL123456.3	isoniazid resistant katG	isoniazid	target alteration
ARO:3003327	AFN51819.1	Mycobacterium tuberculosis mutant embC conferring resistance to ethambutol	Mycobacterium tuberculosis H37Rv	CP003248	ethambutol resistant arabinosyltransferase	polyamine	target alteration
ARO:3003461	CCP44620.1	Mycobacterium tuberculosis ndh mutant conferring resistance to isoniazid	Mycobacterium tuberculosis H37Rv	AL123456.3	resistant ndh	isoniazid	target alteration
ARO:3003394	CCP44816.1	Mycobacterium tuberculosis pncA mutations conferring resistance to pyrazinamide	Mycobacterium tuberculosis H37Rv	AL123456	pyrazinamide resistant pncA	pyrazinamide	target alteration
ARO:3004184	CCP45469.1	Mycobacterium tuberculosis ribD with mutation conferring resistance to para-aminosalicylic acid	Mycobacterium tuberculosis H37Rv	AL123456.3	aminosalicylate resistant dihydrofolate reductase	para-aminosalicylic acid	target replacement
ARO:3003283	CCP43410.1	Mycobacterium tuberculosis rpoB mutants conferring resistance to rifampicin	Mycobacterium tuberculosis H37Rv	AL123456.3	rifamycin-resistant beta-subunit of RNA polymerase (rpoB)	peptide ;rifamycin	target alteration; target replacement
ARO:3004721	CCP44394.1	Mycobacterium tuberculosis rpsA mutations conferring resistance to Pyrazinamide	Mycobacterium tuberculosis H37Rv	AL123456.3	pyrazinamide resistant rpsA	pyrazinamide	target alteration
ARO:3003395	AAK44936.1	Mycobacterium tuberculosis rpsL mutations conferring resistance to Streptomycin	Mycobacterium tuberculosis CDC1551	AE000516	resistant rpsL	aminoglycoside	target alteration
ARO:3004153	CCP45563.1	Mycobacterium tuberculosis thyA with mutation conferring resistance to para-aminosalicylic acid	Mycobacterium tuberculosis H37Rv	AL123456.3	aminosalicylate resistant thymidylate synthase	para-aminosalicylic acid	target alteration
ARO:3003445	AAK46002.1	Mycobacterium tuberculosis tlyA mutations conferring resistance to aminoglycosides	Mycobacterium tuberculosis CDC1551	AE000516	resistant tlyA	aminoglycoside	target alteration
ARO:3003325	CDO45096.1	Mycobacterium tuberculosis variant bovis embB mutations conferring resistance to ethambutol	Mycobacterium tuberculosis variant bovis AF2122/97	BX248333	ethambutol resistant arabinosyltransferase	polyamine	target alteration
ARO:3003779	CAL71877.1	Mycobacterium tuberculosis variant bovis mutant ndh conferring resistance to isoniazid	Mycobacterium tuberculosis variant bovis BCG str. Pasteur 1173P2	AM408590.1	resistant ndh	isoniazid	target alteration
ARO:3003298	CAC29514.1	Mycobaterium leprae gyrA conferring resistance to fluoroquinolones	Mycobacterium leprae TN	AL450380	fluoroquinolone resistant gyrA	fluoroquinolone ;nybomycin	target alteration
ARO:3003778	AIU22003.1	Mycolicibacterium smegmatis mutant ndh conferring resistance to isoniazid	Mycolicibacterium smegmatis	CP009496.1	resistant ndh	isoniazid	target alteration
ARO:3004631	AAC71220.1	Mycoplasma Genitalium GyrA mutation confers resistance to fluoroquinolones	Mycoplasma genitalium G37	L43967.2	fluoroquinolone resistant gyrA	fluoroquinolone ;nybomycin	target alteration
ARO:3004630	AAC71422.1	Mycoplasma Genitalium ParC mutations confers resistance to Moxifloxacin	Mycoplasma genitalium G37	L43967.2	fluoroquinolone resistant parC	fluoroquinolone	target alteration
ARO:3003310	AKJ52802.1	Mycoplasma hominis parC conferring resistance to fluoroquinolone	Mycoplasma hominis	CP011538.1	fluoroquinolone resistant parC;fluoroquinolone self resistant parC	fluoroquinolone	target alteration
ARO:3001300	BAA03674.1	myrA	Micromonospora griseorubida	D16099	non-erm 23S ribosomal RNA methyltransferase (G748)	macrolide ;lincosamide	target alteration
ARO:3000818	AAG07108.1	nalC	Pseudomonas aeruginosa PAO1	AE004091.2	resistance-nodulation-cell division (RND) efflux pump	macrolide ;fluoroquinolone ;monobactam;aminoglycoside ;carbapenem;cephalosporin;glycylcycline;cephamycin;penam;tetracycline ;peptide ;acridine dye;aminocoumarin ;diaminopyrimidine ;sulfonamide ;phenicol ;triclosan;penem;antibacterial free fatty acids	efflux
ARO:3000819	AAG06962.1	nalD	Pseudomonas aeruginosa PAO1	AE004091.2	resistance-nodulation-cell division (RND) efflux pump	macrolide ;fluoroquinolone ;monobactam;aminoglycoside ;carbapenem;cephalosporin;glycylcycline;cephamycin;penam;tetracycline ;peptide ;acridine dye;aminocoumarin ;diaminopyrimidine ;sulfonamide ;phenicol ;triclosan;penem;antibacterial free fatty acids	efflux
ARO:3003928	AAW89357.1	Neisseria gonorrhoeae gyrA conferring resistance to fluoroquinolones	Neisseria gonorrhoeae FA 1090	AE004969.1	fluoroquinolone resistant gyrA	fluoroquinolone ;nybomycin	target alteration
ARO:3000464	AAB57788.1	Neisseria gonorrhoeae mutant porin PIB (por) with reduced permeability to	Neisseria gonorrhoeae	U75641	General Bacterial Porin with reduced permeability to beta-lactams	monobactam;carbapenem;cephalosporin;cephamycin;penam;tetracycline ;penem	reduced permeability to
ARO:3003929	AAW89918.1	Neisseria gonorrhoeae parC conferring resistance to fluoroquinolone	Neisseria gonorrhoeae FA 1090	AE004969.1	fluoroquinolone resistant parC	fluoroquinolone	target alteration
ARO:3003937	AAF40852.1	Neisseria meningititis PBP2 conferring resistance to beta-lactam	Neisseria meningitidis MC58	AE002098.2	Penicillin-binding protein mutations conferring resistance to beta-lactam s	monobactam;carbapenem;cephalosporin;cephamycin;penam	target alteration
ARO:3003589	CAA79967.1	NmcA beta-lactamase	Enterobacter cloacae	Z21956	NmcA beta-lactamase	carbapenem;cephalosporin;cephamycin;penam	inactivation
ARO:3003665	CAA79966.1	NmcR	Enterobacter cloacae	Z21956.1	NmcA beta-lactamase	carbapenem;cephalosporin;cephamycin;penam	inactivation
ARO:3000501	BAD59497.1	Nocardia rifampin resistant beta-subunit of RNA polymerase (rpoB2)	Nocardia farcinica IFM 10152	AP006618.1	rifamycin-resistant beta-subunit of RNA polymerase (rpoB)	peptide ;rifamycin	target alteration; target replacement
ARO:3000391	AAS68233.1	norA	Staphylococcus epidermidis	AY566250	major facilitator superfamily (MFS) efflux pump	macrolide ;fluoroquinolone ;lincosamide ;fosfomycin;cephalosporin;glycylcycline;bicyclomycin;penam;nucleoside ;tetracycline ;peptide ;acridine dye;oxazolidinone ;rifamycin ;diaminopyrimidine ;phenicol ;isoniazid;benzalkonium chloride;rhodamine;antibacterial free fatty acids;nitroimidazole	efflux
ARO:3000421	CCQ22388.1	norB	Listeria monocytogenes	HE999704.1	major facilitator superfamily (MFS) efflux pump	macrolide ;fluoroquinolone ;lincosamide ;fosfomycin;cephalosporin;glycylcycline;bicyclomycin;penam;nucleoside ;tetracycline ;peptide ;acridine dye;oxazolidinone ;rifamycin ;diaminopyrimidine ;phenicol ;isoniazid;benzalkonium chloride;rhodamine;antibacterial free fatty acids;nitroimidazole	efflux
ARO:3002522	AAF67494.2	novA	Streptomyces niveus	AF170880	ATP-binding cassette (ABC) efflux pump	macrolide ;fluoroquinolone ;cephalosporin;penam;tetracycline ;peptide ;acridine dye;aminocoumarin ;rifamycin ;pleuromutilin ;nitroimidazole	efflux
ARO:3004239	AAK14791	NPS-1	Pseudomonas aeruginosa	AY027589	NPS beta-lactamase	cephalosporin;penam	inactivation
ARO:3002514	CAC04522.1	OCH-1	Ochrobactrum anthropi	AJ401618	OCH beta-lactamase	monobactam;cephalosporin;cephamycin;penam;penem	inactivation
ARO:3002515	CAC17622.1	OCH-2	Ochrobactrum anthropi	AJ295340	OCH beta-lactamase	monobactam;cephalosporin;cephamycin;penam;penem	inactivation
ARO:3002516	CAC17623.1	OCH-3	Ochrobactrum anthropi	AJ295341	OCH beta-lactamase	monobactam;cephalosporin;cephamycin;penam;penem	inactivation
ARO:3002517	CAC17624.1	OCH-4	Ochrobactrum anthropi	AJ295342	OCH beta-lactamase	monobactam;cephalosporin;cephamycin;penam;penem	inactivation
ARO:3002518	CAC17625.1	OCH-5	Ochrobactrum anthropi	AJ295343	OCH beta-lactamase	monobactam;cephalosporin;cephamycin;penam;penem	inactivation
ARO:3002519	CAC17626.1	OCH-6	Ochrobactrum anthropi	AJ295344	OCH beta-lactamase	monobactam;cephalosporin;cephamycin;penam;penem	inactivation
ARO:3002520	CAC17627.1	OCH-7	Ochrobactrum anthropi	AJ295345	OCH beta-lactamase	monobactam;cephalosporin;cephamycin;penam;penem	inactivation
ARO:3002521	ABF50909.1	OCH-8	Ochrobactrum anthropi	DQ489307	OCH beta-lactamase	monobactam;cephalosporin;cephamycin;penam;penem	inactivation
ARO:3002445	CAG25831.1	OKP-B-12	Klebsiella pneumoniae	AJ635420	OKP beta-lactamase	cephalosporin;penam	inactivation
ARO:3002441	CAJ19616.1	OKP-B-8	Klebsiella pneumoniae	AM051157	OKP beta-lactamase	cephalosporin;penam	inactivation
ARO:3003036	AAA50325.1	oleB	Streptomyces us	L36601	ABC-F ATP-binding cassette ribosomal protection protein	macrolide ;lincosamide ;streptogramin ;tetracycline ;oxazolidinone ;phenicol ;pleuromutilin	target protection
ARO:3003748	AAA26793	oleC	Streptomyces us	L06249	ATP-binding cassette (ABC) efflux pump	macrolide ;fluoroquinolone ;cephalosporin;penam;tetracycline ;peptide ;acridine dye;rifamycin ;pleuromutilin ;nitroimidazole	efflux
ARO:3000865	ABA42119.2	oleD	Streptomyces us	DQ195536.2	ole glycosyltransferase	macrolide	inactivation
ARO:3000866	ABA42118.2	oleI	Streptomyces us	DQ195535	ole glycosyltransferase	macrolide	inactivation
ARO:3003037	AAC43969.1	opcM	Burkholderia cepacia	U38944.1	resistance-nodulation-cell division (RND) efflux pump	macrolide ;fluoroquinolone ;monobactam;aminoglycoside ;carbapenem;glycylcycline;penam;tetracycline ;acridine dye;aminocoumarin ;diaminopyrimidine ;phenicol ;triclosan;antibacterial free fatty acids	efflux
ARO:3004072	AAG05913.1	OpmB	Pseudomonas aeruginosa PAO1	AE004091.2	resistance-nodulation-cell division (RND) efflux pump	macrolide ;fluoroquinolone ;monobactam;aminoglycoside ;carbapenem;glycylcycline;penam;tetracycline ;acridine dye;aminocoumarin ;diaminopyrimidine ;phenicol ;triclosan;antibacterial free fatty acids	efflux
ARO:3000809	AAG07595.1	opmD	Pseudomonas aeruginosa PAO1	AE004091.2	resistance-nodulation-cell division (RND) efflux pump	macrolide ;fluoroquinolone ;monobactam;aminoglycoside ;carbapenem;glycylcycline;penam;tetracycline ;acridine dye;aminocoumarin ;diaminopyrimidine ;phenicol ;triclosan;antibacterial free fatty acids	efflux
ARO:3003700	BAE06009.1	opmE	Pseudomonas aeruginosa	AB219524.1	resistance-nodulation-cell division (RND) efflux pump	macrolide ;fluoroquinolone ;monobactam;aminoglycoside ;carbapenem;glycylcycline;penam;tetracycline ;acridine dye;aminocoumarin ;diaminopyrimidine ;phenicol ;triclosan;antibacterial free fatty acids	efflux
ARO:3003682	AAG08359.1	OpmH	Pseudomonas aeruginosa PAO1	AE004091.2	resistance-nodulation-cell division (RND) efflux pump	macrolide ;fluoroquinolone ;monobactam;aminoglycoside ;carbapenem;glycylcycline;penam;tetracycline ;acridine dye;aminocoumarin ;diaminopyrimidine ;phenicol ;triclosan;antibacterial free fatty acids	efflux
ARO:3003039	BAM10414.1	oprA	Pseudomonas aeruginosa	AB639410	resistance-nodulation-cell division (RND) efflux pump	macrolide ;fluoroquinolone ;monobactam;aminoglycoside ;carbapenem;glycylcycline;penam;tetracycline ;acridine dye;aminocoumarin ;diaminopyrimidine ;phenicol ;triclosan;antibacterial free fatty acids	efflux
ARO:3000802	AAB41958.1	OprJ	Pseudomonas aeruginosa	U57969	resistance-nodulation-cell division (RND) efflux pump	macrolide ;fluoroquinolone ;monobactam;aminoglycoside ;carbapenem;cephalosporin;glycylcycline;penam;tetracycline ;acridine dye;aminocoumarin ;diaminopyrimidine ;phenicol ;triclosan;antibacterial free fatty acids	efflux
ARO:3000379	AAG03816.1	OprM	Pseudomonas aeruginosa PAO1	AE004091.2	resistance-nodulation-cell division (RND) efflux pump	macrolide ;fluoroquinolone ;monobactam;aminoglycoside ;carbapenem;cephalosporin;glycylcycline;cephamycin;penam;tetracycline ;peptide ;acridine dye;aminocoumarin ;diaminopyrimidine ;sulfonamide ;phenicol ;triclosan;penem;antibacterial free fatty acids	efflux
ARO:3000805	AAG05883.1	OprN	Pseudomonas aeruginosa PAO1	AE004091.2	resistance-nodulation-cell division (RND) efflux pump	macrolide ;fluoroquinolone ;monobactam;aminoglycoside ;carbapenem;glycylcycline;penam;tetracycline ;acridine dye;aminocoumarin ;diaminopyrimidine ;phenicol ;triclosan;antibacterial free fatty acids	efflux
ARO:3004142	EGP45230	OprZ	Achromobacter insuavis AXX-A	AFRQ01000061.1	resistance-nodulation-cell division (RND) efflux pump	macrolide ;fluoroquinolone ;monobactam;aminoglycoside ;carbapenem;cephalosporin;glycylcycline;penam;tetracycline ;acridine dye;aminocoumarin ;diaminopyrimidine ;phenicol ;triclosan;antibacterial free fatty acids	efflux
ARO:3003746	AKA86814	optrA	Enterococcus faecalis	KP399637	ABC-F ATP-binding cassette ribosomal protection protein	macrolide ;lincosamide ;streptogramin ;tetracycline ;oxazolidinone ;phenicol ;pleuromutilin	target protection
ARO:3003922	AAP43109.1	oqxA	Escherichia coli	EU370913.1	resistance-nodulation-cell division (RND) efflux pump	macrolide ;fluoroquinolone ;monobactam;aminoglycoside ;carbapenem;glycylcycline;penam;tetracycline ;acridine dye;aminocoumarin ;diaminopyrimidine ;phenicol ;triclosan;antibacterial free fatty acids;nitrofuran	efflux
ARO:3003923	AAP43110.2	oqxB	Escherichia coli	EU370913.1	resistance-nodulation-cell division (RND) efflux pump	macrolide ;fluoroquinolone ;monobactam;aminoglycoside ;carbapenem;glycylcycline;penam;tetracycline ;acridine dye;aminocoumarin ;diaminopyrimidine ;phenicol ;triclosan;antibacterial free fatty acids;nitrofuran	efflux
ARO:3002891	CAA37477.1	otr(A)	Streptomyces rimosus	X53401	tetracycline-resistant ribosomal protection protein	tetracycline	target protection
ARO:3002892	AAD04032.1	otr(B)	Streptomyces rimosus	AF079900	major facilitator superfamily (MFS) efflux pump	macrolide ;fluoroquinolone ;lincosamide ;fosfomycin;cephalosporin;glycylcycline;bicyclomycin;penam;nucleoside ;tetracycline ;peptide ;acridine dye;oxazolidinone ;rifamycin ;diaminopyrimidine ;phenicol ;isoniazid;benzalkonium chloride;rhodamine;antibacterial free fatty acids;nitroimidazole	efflux
ARO:3002894	AAR96051.1	otrC	Streptomyces rimosus	AY509111	ATP-binding cassette (ABC) efflux pump	macrolide ;fluoroquinolone ;cephalosporin;penam;tetracycline ;peptide ;acridine dye;rifamycin ;pleuromutilin ;nitroimidazole	efflux
ARO:3001405	AAG45720.1	OXA-10	Escherichia coli	AF205943	OXA beta-lactamase	cephalosporin;penam	inactivation
ARO:3001609	ABX38721.1	OXA-114a	Achromobacter xylosoxidans	EU188842	OXA beta-lactamase	cephalosporin;penam	inactivation
ARO:3001407	AAA83417.1	OXA-12	Aeromonas sobria	U10251	OXA beta-lactamase	cephalosporin;penam	inactivation
ARO:3001672	CCJ32595.1	OXA-120	Acinetobacter baumannii	HE963768	OXA beta-lactamase	cephalosporin;penam	inactivation
ARO:3001811	CAP69660.1	OXA-129	Salmonella enterica subsp. enterica serovar Bredeney	AM932669	OXA beta-lactamase	cephalosporin;penam	inactivation
ARO:3001410	AAB05874.1	OXA-15	Pseudomonas aeruginosa	U63835	OXA beta-lactamase	cephalosporin;penam	inactivation
ARO:3001776	ADG27454.1	OXA-162	Klebsiella pneumoniae	HM015773	OXA beta-lactamase	cephalosporin;penam	inactivation
ARO:3001783	ADY06444.1	OXA-163	Enterobacter cloacae	HQ700343	OXA beta-lactamase	cephalosporin;penam	inactivation
ARO:3001469	ADK35873.1	OXA-169	Acinetobacter baumannii	HM488990	OXA beta-lactamase	cephalosporin;penam	inactivation
ARO:3001784	AEP16366.1	OXA-181	Klebsiella pneumoniae	JN205800	OXA beta-lactamase	cephalosporin;penam	inactivation
ARO:3001475	ADV41666.1	OXA-183	Pseudomonas aeruginosa	HQ111474	OXA beta-lactamase	cephalosporin;penam	inactivation
ARO:3001414	AAD02245.1	OXA-19	Pseudomonas aeruginosa	AF043381	OXA beta-lactamase	cephalosporin;penam	inactivation
ARO:3001766	ADZ54048.1	OXA-192	Brachyspira pilosicoli	JF273470	OXA beta-lactamase	cephalosporin;penam	inactivation
ARO:3001805	ADT70779.1	OXA-198	Pseudomonas aeruginosa	HQ634775	OXA beta-lactamase	cephalosporin;penam	inactivation
ARO:3001397	AAB59082.1	OXA-2	Plasmid R46	M95287.4	OXA beta-lactamase	carbapenem;cephalosporin;penam	inactivation
ARO:3001415	ACC55538.1	OXA-20	Acinetobacter baumannii ACICU	CP000863.1	OXA beta-lactamase	cephalosporin;penam	inactivation
ARO:3001788	AFU91598.1	OXA-204	Klebsiella pneumoniae	JQ809466	OXA beta-lactamase	cephalosporin;penam	inactivation
ARO:3001483	AEO92079.1	OXA-205	Pseudomonas aeruginosa	JF800667	OXA beta-lactamase	cephalosporin;penam	inactivation
ARO:3001809	AEM66528.1	OXA-209	Riemerella anatipestifer	JF268688.1	OXA beta-lactamase	cephalosporin;penam	inactivation
ARO:3001416	CAA71699.2	OXA-21	Acinetobacter baumannii	Y10693	OXA beta-lactamase	cephalosporin;penam	inactivation
ARO:3001417	AAD12233.1	OXA-22	Ralstonia pickettii	AF064820	OXA beta-lactamase	cephalosporin;penam	inactivation
ARO:3001807	AHC31001.1	OXA-246	Pseudomonas aeruginosa	KF711993	OXA beta-lactamase	cephalosporin;penam	inactivation
ARO:3001791	AGC70814.1	OXA-247	Klebsiella pneumoniae	JX893517	OXA beta-lactamase	cephalosporin;penam	inactivation
ARO:3001741	EPH31616.1	OXA-286	Acinetobacter gyllenbergii MTCC 11365	ASQH01000019.1	OXA beta-lactamase	cephalosporin;penam	inactivation
ARO:3001424	CAC35728.1	OXA-29	Fluoribacter gormanii	AJ400619	OXA beta-lactamase	cephalosporin;penam	inactivation
ARO:3001751	ENU21024.1	OXA-296	Acinetobacter bohemicus ANC 3994	APOH01000009.1	OXA beta-lactamase	cephalosporin;penam	inactivation
ARO:3001398	AAC41449.1	OXA-3	Pseudomonas aeruginosa	L07945	OXA beta-lactamase	cephalosporin;penam	inactivation
ARO:3001777	AET35493.1	OXA-347	uncultured bacterium	JN086160	OXA beta-lactamase	cephalosporin;penam	inactivation
ARO:3001431	AAG33665.1	OXA-37	Acinetobacter baumannii	AY007784	OXA beta-lactamase	cephalosporin;penam	inactivation
ARO:3001774	AHF71363.1	OXA-370	Enterobacter sp. 87F-2	KF900153	OXA beta-lactamase	cephalosporin;penam	inactivation
ARO:3001769	CAD32564.1	OXA-42	Burkholderia pseudomallei	AJ488302	OXA beta-lactamase	cephalosporin;penam	inactivation
ARO:3001797	AFP97030.1	OXA-46	Pseudomonas aeruginosa	JX131372	OXA beta-lactamase	cephalosporin;penam	inactivation
ARO:3001781	AAP69225.1	OXA-47	Klebsiella pneumoniae	AY237830	OXA beta-lactamase	cephalosporin;penam	inactivation
ARO:3001782	AAP70012.1	OXA-48	Klebsiella pneumoniae	AY236073	OXA beta-lactamase	cephalosporin;penam	inactivation
ARO:3001671	AAP40270.1	OXA-49	Acinetobacter baumannii	AY288523	OXA beta-lactamase	cephalosporin;penam	inactivation
ARO:3001400	CAA41211.1	OXA-5	Pseudomonas aeruginosa	X58272	OXA beta-lactamase	cephalosporin;penam	inactivation
ARO:3001796	AAQ76277.1	OXA-50	Pseudomonas aeruginosa	AY306130	OXA beta-lactamase	cephalosporin;penam	inactivation
ARO:3001810	AAP43641.1	OXA-53	Salmonella enterica subsp. enterica serovar Agona	AY289608	OXA beta-lactamase	cephalosporin;penam	inactivation
ARO:3001812	AAR89917.1	OXA-54	Shewanella oneidensis	AY500137	OXA beta-lactamase	cephalosporin;penam	inactivation
ARO:3001813	AAR03105.1	OXA-55	Shewanella algae	AY343493	OXA beta-lactamase	cephalosporin;penam	inactivation
ARO:3001795	AAR32651.1	OXA-56	Pseudomonas aeruginosa	AY445080	OXA beta-lactamase	cephalosporin;penam	inactivation
ARO:3001771	CAF74882.1	OXA-57	Burkholderia pseudomallei 576	AJ631966	OXA beta-lactamase	cephalosporin;penam	inactivation
ARO:3001772	CAG15145.1	OXA-59	Burkholderia pseudomallei	AJ632249	OXA beta-lactamase	cephalosporin;penam	inactivation
ARO:3001808	AAQ08905.1	OXA-60	Ralstonia pickettii	AF525303	OXA beta-lactamase	cephalosporin;penam	inactivation
ARO:3004478	EPF70268.1	OXA-665	Acinetobacter rudis CIP 110305	ATGI01000038.1	OXA beta-lactamase	cephalosporin;penam	inactivation
ARO:3001780	AAP69916.1	OXA-85	Fusobacterium nucleatum	AY227054	OXA beta-lactamase	cephalosporin;penam	inactivation
ARO:3001404	AAA98406.1	OXA-9	Klebsiella pneumoniae	M55547	OXA beta-lactamase	cephalosporin;penam	inactivation
ARO:3002389	CAA82916.1	OXY-1-1	Klebsiella oxytoca	Z30177	OXY beta-lactamase	monobactam;cephalosporin;penam	inactivation
ARO:3002399	CAB42614.1	OXY-2-4	Klebsiella oxytoca	Y17714	OXY beta-lactamase	monobactam;cephalosporin;penam	inactivation
ARO:3000024	AAK76137.1	patA	Streptococcus pneumoniae TIGR4	AE005672.3	ATP-binding cassette (ABC) efflux pump	macrolide ;fluoroquinolone ;cephalosporin;penam;tetracycline ;peptide ;acridine dye;rifamycin ;pleuromutilin ;nitroimidazole	efflux
ARO:3000025	AAK76136.1	patB	Streptococcus pneumoniae TIGR4	AE005672.3	ATP-binding cassette (ABC) efflux pump	macrolide ;fluoroquinolone ;cephalosporin;penam;tetracycline ;peptide ;acridine dye;rifamycin ;pleuromutilin ;nitroimidazole	efflux
ARO:3002509	ACQ82815.1	PDC-10	Pseudomonas aeruginosa	FJ666073	PDC beta-lactamase	monobactam;carbapenem;cephalosporin	inactivation
ARO:3002498	ACQ82806.1	PDC-2	Pseudomonas aeruginosa	FJ666064	PDC beta-lactamase	monobactam;carbapenem;cephalosporin	inactivation
ARO:3002502	ACQ82810.1	PDC-5	Pseudomonas aeruginosa	FJ666068	PDC beta-lactamase	monobactam;carbapenem;cephalosporin	inactivation
ARO:3002506	ACQ82812.1	PDC-7	Pseudomonas aeruginosa	FJ666070	PDC beta-lactamase	monobactam;carbapenem;cephalosporin	inactivation
ARO:3004336	AKR18013.1	PDC-73	Pseudomonas aeruginosa	KR057742.1	PDC beta-lactamase	monobactam;carbapenem;cephalosporin	inactivation
ARO:3004337	AKR18014.1	PDC-74	Pseudomonas aeruginosa	KR057743.1	PDC beta-lactamase	monobactam;carbapenem;cephalosporin	inactivation
ARO:3004339	AKR18016.1	PDC-76	Pseudomonas aeruginosa	KR057745.1	PDC beta-lactamase	monobactam;carbapenem;cephalosporin	inactivation
ARO:3002507	ACQ82813.1	PDC-8	Pseudomonas aeruginosa	FJ666071	PDC beta-lactamase	monobactam;carbapenem;cephalosporin	inactivation
ARO:3004343	AKR18020.1	PDC-80	Pseudomonas aeruginosa	KR057749.1	PDC beta-lactamase	monobactam;carbapenem;cephalosporin	inactivation
ARO:3004348	AKR18025.1	PDC-85	Pseudomonas aeruginosa	KR057754.1	PDC beta-lactamase	monobactam;carbapenem;cephalosporin	inactivation
ARO:3004350	AKR18027.1	PDC-87	Pseudomonas aeruginosa	KR057756.1	PDC beta-lactamase	monobactam;carbapenem;cephalosporin	inactivation
ARO:3002508	ACQ82814.1	PDC-9	Pseudomonas aeruginosa	FJ666072	PDC beta-lactamase	monobactam;carbapenem;cephalosporin	inactivation
ARO:3004353	AKR18030.1	PDC-90	Pseudomonas aeruginosa	KR057759.1	PDC beta-lactamase	monobactam;carbapenem;cephalosporin	inactivation
ARO:3004355	AKR18032.1	PDC-92	Pseudomonas aeruginosa	KR057761.1	PDC beta-lactamase	monobactam;carbapenem;cephalosporin	inactivation
ARO:3003670	AJP77059	PEDO-1	Pedobacter sp. SI-33	KP109677	subclass B3 PEDO beta-lactamase	carbapenem	inactivation
ARO:3003714	AJP77071	PEDO-2	Pedobacter sp. ALS-14	KP109678	subclass B3 PEDO beta-lactamase	carbapenem	inactivation
ARO:3003715	AJP77076	PEDO-3	Pedobacter sp. Stok-3	KP109679	subclass B1 PEDO beta-lactamase	carbapenem	inactivation
ARO:3002363	CAA79968.1	PER-1	Pseudomonas aeruginosa	Z21957.1	PER beta-lactamase	monobactam;carbapenem;cephalosporin;penam;penem	inactivation
ARO:3002364	CAA63714.1	PER-2	Salmonella enterica subsp. enterica serovar Typhimurium	X93314	PER beta-lactamase	monobactam;carbapenem;cephalosporin;penam;penem	inactivation
ARO:3002366	ACE77058.1	PER-4	Proteus vulgaris	EU748544	PER beta-lactamase	monobactam;carbapenem;cephalosporin;penam;penem	inactivation
ARO:3002369	AEI54993.1	PER-7	Acinetobacter baumannii	HQ713678	PER beta-lactamase	monobactam;carbapenem;cephalosporin;penam;penem	inactivation
ARO:3004666	ADI87853.1	pexA	uncultured bacterium Ak20-3	HM537013.1	major facilitator superfamily (MFS) efflux pump	macrolide ;fluoroquinolone ;lincosamide ;fosfomycin;cephalosporin;glycylcycline;bicyclomycin;penam;nucleoside ;tetracycline ;peptide ;acridine dye;oxazolidinone ;rifamycin ;diaminopyrimidine ;phenicol ;isoniazid;benzalkonium chloride;rhodamine;antibacterial free fatty acids;nitroimidazole	efflux
ARO:3003920	BAG33043.1	pgpB	Porphyromonas gingivalis ATCC 33277	AP009380.1	lipid A phosphatase	peptide	target alteration
ARO:3003361	AAB39605.1	Planobispora rosea EF-Tu mutants conferring resistance to inhibitor GE2270A	Planobispora rosea	U67308.1	elfamycin resistant EF-Tu	elfamycin	target alteration
ARO:3002689	BAA03718.1	plasmid-encoded cat (pp-cat)	Photobacterium damselae subsp. piscicida	D16171	chloramphenicol acetyltransferase (CAT)	phenicol	inactivation
ARO:3004077	AAG04750.1	PmpM	Pseudomonas aeruginosa PAO1	AE004091.2	multidrug and toxic compound extrusion (MATE) transporter	fluoroquinolone ;aminoglycoside ;glycylcycline;tetracycline ;acridine dye;benzalkonium chloride	efflux
ARO:3000822	AAK99679.1	pmrA	Streptococcus pneumoniae R6	AE007317.1	major facilitator superfamily (MFS) efflux pump	macrolide ;fluoroquinolone ;lincosamide ;fosfomycin;cephalosporin;glycylcycline;bicyclomycin;penam;nucleoside ;tetracycline ;peptide ;acridine dye;oxazolidinone ;rifamycin ;diaminopyrimidine ;phenicol ;isoniazid;benzalkonium chloride;rhodamine;antibacterial free fatty acids;nitroimidazole	efflux
ARO:3003578	AAC75314.1	pmrF	Escherichia coli str. K-12 substr. MG1655	U00096	pmr phosphoethanolamine transferase	peptide	target alteration
ARO:3004571	AWN09461.1	PNGM-1	uncultured bacterium	MF445022.1	PNGM beta-lactamase	carbapenem;cephalosporin;penam	inactivation
ARO:3004114	APB87301	porin OmpC	Escherichia coli	KY086517	General Bacterial Porin with reduced permeability to beta-lactams	monobactam;carbapenem;cephalosporin;cephamycin;penam;penem	reduced permeability to
ARO:3004470	AVI44920.1	poxtA	Staphylococcus aureus	MF095097.1	ABC-F ATP-binding cassette ribosomal protection protein	macrolide ;lincosamide ;streptogramin ;tetracycline ;oxazolidinone ;phenicol ;pleuromutilin	target protection
ARO:3002812	BAA07072.1	pp-flo	Photobacterium damselae subsp. piscicida	D37826	major facilitator superfamily (MFS) efflux pump	macrolide ;fluoroquinolone ;lincosamide ;fosfomycin;cephalosporin;glycylcycline;bicyclomycin;penam;nucleoside ;tetracycline ;peptide ;acridine dye;oxazolidinone ;rifamycin ;diaminopyrimidine ;phenicol ;isoniazid;benzalkonium chloride;rhodamine;antibacterial free fatty acids;nitroimidazole	efflux
ARO:3002678	CAA11473.1	Pseudomonas aeruginos catB6	Pseudomonas aeruginosa	AJ223604	chloramphenicol acetyltransferase (CAT)	phenicol	inactivation
ARO:3004054	SIP52035.1	Pseudomonas aeruginosa CpxR	Pseudomonas aeruginosa	LT673656.1	resistance-nodulation-cell division (RND) efflux pump	macrolide ;fluoroquinolone ;monobactam;aminoglycoside ;carbapenem;cephalosporin;glycylcycline;cephamycin;penam;tetracycline ;peptide ;acridine dye;aminocoumarin ;diaminopyrimidine ;sulfonamide ;phenicol ;triclosan;penem;antibacterial free fatty acids	efflux
ARO:3004038	AAG08375.1	Pseudomonas aeruginosa emrE	Pseudomonas aeruginosa PAO1	AE004091.2	small multidrug resistance (SMR) efflux pump	macrolide ;aminoglycoside ;tetracycline ;aminocoumarin ;phenicol	efflux
ARO:3003702	BAA37152.1	Pseudomonas aeruginosa gyrA and parC conferring resistance to fluoroquinolone	Pseudomonas aeruginosa	AB003428.1	fluoroquinolone resistant parC;fluoroquinolone resistant gyrA	fluoroquinolone ;nybomycin	target alteration
ARO:3003684	AAG06556.1	Pseudomonas aeruginosa gyrA conferring resistance to fluoroquinolones	Pseudomonas aeruginosa PAO1	AE004091.2	fluoroquinolone resistant gyrA	fluoroquinolone ;nybomycin	target alteration
ARO:3003390	AAC74015.1	Pseudomonas aeruginosa ompF with mutation	Escherichia coli str. K-12 substr. MG1655	U00096.3	General Bacterial Porin with reduced permeability to beta-lactams	monobactam;carbapenem;cephalosporin;cephamycin;penam;penem	reduced permeability to
ARO:3003686	NP_249649.1	Pseudomonas aeruginosa oprD with mutation conferring resistance to imipenem	Pseudomonas aeruginosa PAO1	NC_002516.2	Outer Membrane Porin (Opr)	monobactam;carbapenem;cephalosporin;cephamycin;penam;penem	reduced permeability to
ARO:3003685	AAG08352.1	Pseudomonas aeruginosa parE conferring resistance to fluoroquinolones	Pseudomonas aeruginosa PAO1	AE004091.2	fluoroquinolone resistant parE	fluoroquinolone	target alteration
ARO:3004107	AAG05661.1	Pseudomonas aeruginosa soxR	Pseudomonas aeruginosa PAO1	AE004091.2	ATP-binding cassette (ABC) efflux pump;major facilitator superfamily (MFS) efflux pump;resistance-nodulation-cell division (RND) efflux pump	macrolide ;fluoroquinolone ;monobactam;aminoglycoside ;lincosamide ;carbapenem;fosfomycin;cephalosporin;glycylcycline;bicyclomycin;penam;nucleoside ;tetracycline ;peptide ;acridine dye;oxazolidinone ;aminocoumarin ;rifamycin ;diaminopyrimidine ;phenicol ;isoniazid;pleuromutilin ;triclosan;benzalkonium chloride;rhodamine;antibacterial free fatty acids;nitroimidazole	target alteration; efflux
ARO:3003895	AAG04568.1	Pseudomonas mutant PhoP conferring resistance to colistin	Pseudomonas aeruginosa PAO1	AE004091.2	ATP-binding cassette (ABC) efflux pump;pmr phosphoethanolamine transferase	macrolide ;fluoroquinolone ;cephalosporin;penam;tetracycline ;peptide ;acridine dye;rifamycin ;pleuromutilin ;nitroimidazole	target alteration; efflux
ARO:3003896	AAG04569.1	Pseudomonas mutant PhoQ conferring resistance to colistin	Pseudomonas aeruginosa PAO1	AE004091.2	ATP-binding cassette (ABC) efflux pump;pmr phosphoethanolamine transferase	macrolide ;fluoroquinolone ;cephalosporin;penam;tetracycline ;peptide ;acridine dye;rifamycin ;pleuromutilin ;nitroimidazole	target alteration; efflux
ARO:3003688	AAM15533.1	PvrR	Pseudomonas aeruginosa	AF482691.2	phenotypic variant regulator	aminoglycoside	resistance by absence
ARO:3003046	BAJ09383.1	qacA	Staphylococcus aureus	AB566411	major facilitator superfamily (MFS) efflux pump	macrolide ;fluoroquinolone ;lincosamide ;fosfomycin;cephalosporin;glycylcycline;bicyclomycin;penam;nucleoside ;tetracycline ;peptide ;acridine dye;oxazolidinone ;rifamycin ;diaminopyrimidine ;phenicol ;isoniazid;benzalkonium chloride;rhodamine;antibacterial free fatty acids;nitroimidazole	efflux
ARO:3003047	AAQ10694.1	qacB	Staphylococcus aureus	AF535087	major facilitator superfamily (MFS) efflux pump	macrolide ;fluoroquinolone ;lincosamide ;fosfomycin;cephalosporin;glycylcycline;bicyclomycin;penam;nucleoside ;tetracycline ;peptide ;acridine dye;oxazolidinone ;rifamycin ;diaminopyrimidine ;phenicol ;isoniazid;benzalkonium chloride;rhodamine;antibacterial free fatty acids;nitroimidazole	efflux
ARO:3003836	AAZ42322.1	qacH	Vibrio cholerae	DQ149925.1	small multidrug resistance (SMR) efflux pump	macrolide ;fluoroquinolone ;aminoglycoside ;tetracycline ;aminocoumarin ;phenicol	efflux
ARO:3000448	AEZ36150.1	qepA	Klebsiella aerogenes	JQ064560.1	major facilitator superfamily (MFS) efflux pump	macrolide ;fluoroquinolone ;lincosamide ;fosfomycin;cephalosporin;glycylcycline;bicyclomycin;penam;nucleoside ;tetracycline ;peptide ;acridine dye;oxazolidinone ;rifamycin ;diaminopyrimidine ;phenicol ;isoniazid;benzalkonium chloride;rhodamine;antibacterial free fatty acids;nitroimidazole	efflux
ARO:3004103	ACF70723.1	QepA2	Escherichia coli Partial	EU847537.1	major facilitator superfamily (MFS) efflux pump	macrolide ;fluoroquinolone ;lincosamide ;fosfomycin;cephalosporin;glycylcycline;bicyclomycin;penam;nucleoside ;tetracycline ;peptide ;acridine dye;oxazolidinone ;rifamycin ;diaminopyrimidine ;phenicol ;isoniazid;benzalkonium chloride;rhodamine;antibacterial free fatty acids;nitroimidazole	efflux
ARO:3004379	AQX36338.1	QepA4	Escherichia coli	KX686116.1	major facilitator superfamily (MFS) efflux pump	macrolide ;fluoroquinolone ;lincosamide ;fosfomycin;cephalosporin;glycylcycline;bicyclomycin;penam;nucleoside ;tetracycline ;peptide ;acridine dye;oxazolidinone ;rifamycin ;diaminopyrimidine ;phenicol ;isoniazid;benzalkonium chloride;rhodamine;antibacterial free fatty acids;nitroimidazole	efflux
ARO:3002707	ABI50486.1	QnrA1	Klebsiella pneumoniae	DQ831141	quinolone resistance protein (qnr)	fluoroquinolone	target protection
ARO:3002708	ADU33193.1	QnrA2	Shewanella algae	HQ449669	quinolone resistance protein (qnr)	fluoroquinolone	target protection
ARO:3002709	AAZ04782.1	QnrA3	Shewanella algae	DQ058661	quinolone resistance protein (qnr)	fluoroquinolone	target protection
ARO:3002710	AAZ04783.1	QnrA4	Shewanella algae	DQ058662	quinolone resistance protein (qnr)	fluoroquinolone	target protection
ARO:3002711	AAZ04784.1	QnrA5	Shewanella algae	DQ058663	quinolone resistance protein (qnr)	fluoroquinolone	target protection
ARO:3002712	AAZ78355.1	QnrA6	Proteus mirabilis	DQ151889	quinolone resistance protein (qnr)	fluoroquinolone	target protection
ARO:3002713	ACV83303.2	QnrA7	Shewanella algae	GQ463707	quinolone resistance protein (qnr)	fluoroquinolone	target protection
ARO:3002728	ABX72044.1	QnrB14	Citrobacter freundii	EU273757	quinolone resistance protein (qnr)	fluoroquinolone	target protection
ARO:3002730	ABX72227.1	QnrB15	Citrobacter freundii	EU302865	quinolone resistance protein (qnr)	fluoroquinolone	target protection
ARO:3002731	ABV66096.1	QnrB16	Citrobacter freundii	EU136183	quinolone resistance protein (qnr)	fluoroquinolone	target protection
ARO:3002715	ABO93588.1	QnrB2	Proteus mirabilis	EF488762	quinolone resistance protein (qnr)	fluoroquinolone	target protection
ARO:3002735	BAG55487.1	QnrB20	Escherichia coli	AB379831	quinolone resistance protein (qnr)	fluoroquinolone	target protection
ARO:3002738	ACS71747.1	QnrB23	Citrobacter freundii	FJ981622	quinolone resistance protein (qnr)	fluoroquinolone	target protection
ARO:3002740	ADN94685.1	QnrB25	Citrobacter freundii	HQ172108	quinolone resistance protein (qnr)	fluoroquinolone	target protection
ARO:3002741	AEH59666.1	QnrB26	Proteus vulgaris	HQ386846	quinolone resistance protein (qnr)	fluoroquinolone	target protection
ARO:3002742	ADM52186.1	QnrB27	Citrobacter braakii	HM439641	quinolone resistance protein (qnr)	fluoroquinolone	target protection
ARO:3002744	ADM52193.1	QnrB29	Citrobacter freundii	HM439649	quinolone resistance protein (qnr)	fluoroquinolone	target protection
ARO:3002746	ADQ43424.1	QnrB31	Klebsiella pneumoniae	HQ418999	quinolone resistance protein (qnr)	fluoroquinolone	target protection
ARO:3002747	AEL00450.1	QnrB32	Citrobacter freundii	JN173054	quinolone resistance protein (qnr)	fluoroquinolone	target protection
ARO:3002750	AEL00456.1	QnrB35	Citrobacter freundii	JN173057	quinolone resistance protein (qnr)	fluoroquinolone	target protection
ARO:3002718	ABC17630.2	QnrB4	Escherichia coli	DQ303921	quinolone resistance protein (qnr)	fluoroquinolone	target protection
ARO:3002755	AEL31271.1	QnrB40	Citrobacter braakii	JN166689	quinolone resistance protein (qnr)	fluoroquinolone	target protection
ARO:3002756	AEL31272.1	QnrB41	Citrobacter freundii	JN166690	quinolone resistance protein (qnr)	fluoroquinolone	target protection
ARO:3002757	AEQ94272.1	QnrB42	Klebsiella pneumoniae	JN680743	quinolone resistance protein (qnr)	fluoroquinolone	target protection
ARO:3002760	AFA52644.1	QnrB45	Escherichia coli	JQ349152	quinolone resistance protein (qnr)	fluoroquinolone	target protection
ARO:3002761	ADW54092.1	QnrB46	Klebsiella pneumoniae	HQ704413	quinolone resistance protein (qnr)	fluoroquinolone	target protection
ARO:3002762	AFU25658.1	QnrB47	Citrobacter freundii	JX440358	quinolone resistance protein (qnr)	fluoroquinolone	target protection
ARO:3002763	AFH88686.1	QnrB48	Citrobacter freundii	JQ762640	quinolone resistance protein (qnr)	fluoroquinolone	target protection
ARO:3002764	AFD54601.1	QnrB49	Citrobacter freundii	JQ582718	quinolone resistance protein (qnr)	fluoroquinolone	target protection
ARO:3002719	ABC17628.1	QnrB5	Salmonella enterica subsp. enterica serovar Berta	DQ303919	quinolone resistance protein (qnr)	fluoroquinolone	target protection
ARO:3002768	AHE41343.1	QnrB55	Raoultella terrigena	KF730650	quinolone resistance protein (qnr)	fluoroquinolone	target protection
ARO:3002770	AFR46588.1	QnrB57	Citrobacter freundii	JX259318	quinolone resistance protein (qnr)	fluoroquinolone	target protection
ARO:3002773	BAN04743.1	QnrB60	Citrobacter freundii	AB734055	quinolone resistance protein (qnr)	fluoroquinolone	target protection
ARO:3002777	AGL43626.1	QnrB65	Citrobacter freundii	KC580654	quinolone resistance protein (qnr)	fluoroquinolone	target protection
ARO:3002786	AHX97725.1	QnrB74	Escherichia coli	KJ415247	quinolone resistance protein (qnr)	fluoroquinolone	target protection
ARO:3002722	ABW03157.2	QnrB8	Citrobacter freundii	EU043312	quinolone resistance protein (qnr)	fluoroquinolone	target protection
ARO:3002787	ACK75961.1	QnrC	Proteus mirabilis	EU917444	quinolone resistance protein (qnr)	fluoroquinolone	target protection
ARO:3002788	ACG70184.1	QnrD1	Salmonella enterica subsp. enterica serovar Bovismorbificans	FJ228229	quinolone resistance protein (qnr)	fluoroquinolone	target protection
ARO:3002789	AHY03238.1	QnrD2	Salmonella enterica subsp. enterica serovar Hadar	KJ158441	quinolone resistance protein (qnr)	fluoroquinolone	target protection
ARO:3004636	APC93960.1	qnrE1	Klebsiella pneumoniae	KY073238.1	quinolone resistance protein (qnr)	fluoroquinolone	target protection
ARO:3004637	AQV34023.1	qnrE2	Escherichia coli	CP018961.1	quinolone resistance protein (qnr)	fluoroquinolone	target protection
ARO:3002790	ABF47469.1	QnrS1	Salmonella enterica subsp. enterica serovar Bovismorbificans	DQ485529.1	quinolone resistance protein (qnr)	fluoroquinolone	target protection
ARO:3004622	AEU11363.1	QnrS10	Klebsiella pneumoniae	JN836269.1	quinolone resistance protein (qnr)	fluoroquinolone	target protection
ARO:3004624	AFM45990.1	QnrS11	Escherichia coli	JQ269335.1	quinolone resistance protein (qnr)	fluoroquinolone	target protection
ARO:3004625	OIZ71829.1	QnrS12	Escherichia coli	MKQI01000097.1	quinolone resistance protein (qnr)	fluoroquinolone	target protection
ARO:3004627	AZP56652.1	QnrS15	Escherichia coli	MK303617.1	quinolone resistance protein (qnr)	fluoroquinolone	target protection
ARO:3002791	ABF47470.1	QnrS2	Salmonella enterica subsp. enterica serovar Anatum	DQ485530	quinolone resistance protein (qnr)	fluoroquinolone	target protection
ARO:3002792	ABU52984.1	QnrS3	Escherichia coli	EU077611	quinolone resistance protein (qnr)	fluoroquinolone	target protection
ARO:3002793	ACJ24509.1	QnrS4	Salmonella enterica subsp. enterica serovar Stanley	FJ418153	quinolone resistance protein (qnr)	fluoroquinolone	target protection
ARO:3002794	AEG74319.1	QnrS5	Aeromonas sobria	HQ631377	quinolone resistance protein (qnr)	fluoroquinolone	target protection
ARO:3002795	AEG74318.1	QnrS6	Aeromonas hydrophila	HQ631376	quinolone resistance protein (qnr)	fluoroquinolone	target protection
ARO:3002796	AHE41344.1	QnrS7	Escherichia coli	KF730651	quinolone resistance protein (qnr)	fluoroquinolone	target protection
ARO:3002797	AHE41345.1	QnrS8	Klebsiella pneumoniae	KF730652	quinolone resistance protein (qnr)	fluoroquinolone	target protection
ARO:3002798	AHF20043.1	QnrS9	Klebsiella pneumoniae	KF732714	quinolone resistance protein (qnr)	fluoroquinolone	target protection
ARO:3002799	ACC54440.2	QnrVC1	Vibrio cholerae	EU436855	quinolone resistance protein (qnr)	fluoroquinolone	target protection
ARO:3002800	ADI81040.1	QnrVC3	Vibrio cholerae non-O1/non-O139	HM015626	quinolone resistance protein (qnr)	fluoroquinolone	target protection
ARO:3002801	ADI55014.1	QnrVC4	Aeromonas caviae	GQ891757	quinolone resistance protein (qnr)	fluoroquinolone	target protection
ARO:3002802	AEM62764.1	QnrVC5	Vibrio fluvialis	JN408080	quinolone resistance protein (qnr)	fluoroquinolone	target protection
ARO:3002803	AGH08253.1	QnrVC6	Vibrio parahaemolyticus	KC202804	quinolone resistance protein (qnr)	fluoroquinolone	target protection
ARO:3003193	AJA36815.1	QnrVC7	Vibrio cholerae	KM555152	quinolone resistance protein (qnr)	fluoroquinolone	target protection
ARO:3000823	AFK13828.1	ramA	Enterobacter cloacae	JQ727668	resistance-nodulation-cell division (RND) efflux pump;General Bacterial Porin with reduced permeability to beta-lactams	macrolide ;fluoroquinolone ;monobactam;aminoglycoside ;carbapenem;cephalosporin;glycylcycline;cephamycin;penam;tetracycline ;acridine dye;aminocoumarin ;rifamycin ;diaminopyrimidine ;phenicol ;triclosan;penem;antibacterial free fatty acids	efflux;reduced permeability to
ARO:3000245	ADV91011.1	RbpA	Mycolicibacterium smegmatis MC2 155	HQ203032	RbpA bacterial RNA polymerase-binding protein	rifamycin	target protection
ARO:3003563	CAA33795.1	RCP-1	Rhodobacter capsulatus	X15791	RCP beta-lactamase	penam	inactivation
ARO:3002883	AFO53532.1	rgt1438	Streptomyces sp. WAC1438	JX028276.1	rifampin glycosyltransferase	rifamycin	inactivation
ARO:3004291	ABA81355.1	Rhodobacter sphaeroides ampC beta-lactamase	Rhodobacter sphaeroides 2.4.1	CP000144.2	ampC-type beta-lactamase	cephalosporin;penam	inactivation
ARO:3002701	CAA78046.1	Rhodococcus fascians cmr	Rhodococcus fascians	Z12001	major facilitator superfamily (MFS) efflux pump	macrolide ;fluoroquinolone ;lincosamide ;fosfomycin;cephalosporin;glycylcycline;bicyclomycin;penam;nucleoside ;tetracycline ;peptide ;acridine dye;oxazolidinone ;rifamycin ;diaminopyrimidine ;phenicol ;isoniazid;benzalkonium chloride;rhodamine;antibacterial free fatty acids;nitroimidazole	efflux
ARO:3001301	AJD73064.1	RlmA(II)	Streptococcus pneumoniae	CP007593.1	non-erm 23S ribosomal RNA methyltransferase (G748)	macrolide ;lincosamide	target alteration
ARO:3003894	AGU01679.2	Rm3 beta-lactamase	uncultured bacterium	KF485393.2	Rm3 family beta-lactamase	carbapenem;cephalosporin;penam	inactivation
ARO:3002995	CAA37052.1	ROB-1	Mannheimia haemolytica	X52872	ROB beta-lactamase	cephalosporin;penam	inactivation
ARO:3003048	AAC60781.1	rosA	Yersinia enterocolitica (type O:8)	U46859.1	major facilitator superfamily (MFS) efflux pump	macrolide ;fluoroquinolone ;lincosamide ;fosfomycin;cephalosporin;glycylcycline;bicyclomycin;penam;nucleoside ;tetracycline ;peptide ;acridine dye;oxazolidinone ;rifamycin ;diaminopyrimidine ;phenicol ;isoniazid;benzalkonium chloride;rhodamine;antibacterial free fatty acids;nitroimidazole	efflux
ARO:3003049	AAC60780.1	rosB	Yersinia enterocolitica (type O:8)	U46859	major facilitator superfamily (MFS) efflux pump	macrolide ;fluoroquinolone ;lincosamide ;fosfomycin;cephalosporin;glycylcycline;bicyclomycin;penam;nucleoside ;tetracycline ;peptide ;acridine dye;oxazolidinone ;rifamycin ;diaminopyrimidine ;phenicol ;isoniazid;benzalkonium chloride;rhodamine;antibacterial free fatty acids;nitroimidazole	efflux
ARO:3000444	AIA08936.1	rphA	Streptomyces sp. WAC4747	KJ151292	rifampin phosphotransferase	rifamycin	inactivation
ARO:3003992	APB03222.1	rphB	Paenibacillus sp. LC231	KX531052.1	rifampin phosphotransferase	rifamycin	inactivation
ARO:3003930	AAW90462.1	rpsJ	Neisseria gonorrhoeae FA 1090	AE004969.1	tetracycline-resistant ribosomal protection protein	tetracycline	target protection
ARO:3004444	AUW34365.1	RSA-1	uncultured bacterium	MG739510.1	RSA beta-lactamase	carbapenem;cephalosporin	inactivation
ARO:3003749	AGN74946	salA	Staphylococcus sciuri subsp. sciuri	KC693025	ABC-F ATP-binding cassette ribosomal protection protein	macrolide ;lincosamide ;streptogramin ;tetracycline ;oxazolidinone ;phenicol ;pleuromutilin	target protection
ARO:3002691	CAD31707.1	Salmonella enterica cmlA	Salmonella enterica subsp. enterica serovar Typhimurium	AJ487033	major facilitator superfamily (MFS) efflux pump	macrolide ;fluoroquinolone ;lincosamide ;fosfomycin;cephalosporin;glycylcycline;bicyclomycin;penam;nucleoside ;tetracycline ;peptide ;acridine dye;oxazolidinone ;rifamycin ;diaminopyrimidine ;phenicol ;isoniazid;benzalkonium chloride;rhodamine;antibacterial free fatty acids;nitroimidazole	efflux
ARO:3003926	AAL21173.1	Salmonella enterica gyrA with mutation conferring resistance to triclosan	Salmonella enterica subsp. enterica serovar Typhimurium str. LT2	AE006468.2	triclosan resistant gyrA	triclosan	target alteration
ARO:3003939	AAL22048.1	Salmonella enterica parC conferring resistance to fluoroquinolones	Salmonella enterica subsp. enterica serovar Typhimurium str. LT2	AE006468.2	fluoroquinolone resistant parC	fluoroquinolone	target alteration
ARO:3003379	ACH50230.1	Salmonella enterica ramR mutants	Salmonella enterica subsp. enterica serovar Agona str. SL483	CP001138.1	resistance-nodulation-cell division (RND) efflux pump	macrolide ;fluoroquinolone ;monobactam;aminoglycoside ;carbapenem;cephalosporin;glycylcycline;penam;tetracycline ;acridine dye;aminocoumarin ;rifamycin ;diaminopyrimidine ;phenicol ;triclosan;antibacterial free fatty acids	target alteration; efflux
ARO:3003382	CAD09250.1	Salmonella enterica soxR with mutation conferring resistance	Salmonella enterica subsp. enterica serovar Typhi str. CT18	AL513382.1	ATP-binding cassette (ABC) efflux pump;major facilitator superfamily (MFS) efflux pump;resistance-nodulation-cell division (RND) efflux pump	macrolide ;fluoroquinolone ;monobactam;aminoglycoside ;lincosamide ;carbapenem;fosfomycin;cephalosporin;glycylcycline;bicyclomycin;penam;nucleoside ;tetracycline ;peptide ;acridine dye;oxazolidinone ;aminocoumarin ;rifamycin ;diaminopyrimidine ;phenicol ;isoniazid;pleuromutilin ;triclosan;benzalkonium chloride;rhodamine;antibacterial free fatty acids;nitroimidazole	target alteration; efflux
ARO:3003307	AAL22694.1	Salmonella serovars gyrB conferring resistance to fluoroquinolone	Salmonella enterica subsp. enterica serovar Typhimurium str. LT2	AE006468.2	fluoroquinolone resistant gyrB	fluoroquinolone ;aminocoumarin	target alteration
ARO:3003317	AAL22055.1	Salmonella serovars parE conferring resistance to fluoroquinolones	Salmonella enterica subsp. enterica serovar Typhimurium str. LT2	AE006468.2	fluoroquinolone resistant parE	fluoroquinolone	target alteration
ARO:3003383	AAL23089.1	Salmonella serovars soxS with mutation conferring resistance	Salmonella enterica subsp. enterica serovar Typhimurium str. LT2	AE006468.2	ATP-binding cassette (ABC) efflux pump;major facilitator superfamily (MFS) efflux pump;resistance-nodulation-cell division (RND) efflux pump;General Bacterial Porin with reduced permeability to beta-lactams	macrolide ;fluoroquinolone ;monobactam;aminoglycoside ;lincosamide ;carbapenem;fosfomycin;cephalosporin;glycylcycline;cephamycin;bicyclomycin;penam;nucleoside ;tetracycline ;peptide ;acridine dye;oxazolidinone ;aminocoumarin ;rifamycin ;diaminopyrimidine ;phenicol ;isoniazid;pleuromutilin ;triclosan;penem;benzalkonium chloride;rhodamine;antibacterial free fatty acids;nitroimidazole	target alteration; efflux;reduced permeability to
ARO:3002895	BAD95494.1	SAT-1	Escherichia coli	AB211124	streptothricin acetyltransferase (SAT)	nucleoside	inactivation
ARO:3002898	CAA88265.1	SAT-3	Escherichia coli	Z48231	streptothricin acetyltransferase (SAT)	nucleoside	inactivation
ARO:3002897	AAB53445.1	SAT-4	Campylobacter coli	U01945	streptothricin acetyltransferase (SAT)	nucleoside	inactivation
ARO:3000826	AAL20862.1	sdiA	Salmonella enterica subsp. enterica serovar Typhimurium str. LT2	AE006468.2	resistance-nodulation-cell division (RND) efflux pump	macrolide ;fluoroquinolone ;monobactam;aminoglycoside ;carbapenem;cephalosporin;glycylcycline;penam;tetracycline ;acridine dye;aminocoumarin ;rifamycin ;diaminopyrimidine ;phenicol ;triclosan;antibacterial free fatty acids	efflux
ARO:3003561	AAK63223.1	Sed1 beta-lactamase	Citrobacter sedlakii	AF321608	Sed beta-lactamase	cephalosporin;penam	inactivation
ARO:3004128	AIA49384.1	Serratia marcescens Omp1	Serratia sp. FS14	CP005927.1	General Bacterial Porin with reduced permeability to beta-lactams	fluoroquinolone ;monobactam;carbapenem;cephalosporin;cephamycin;penam;tetracycline ;phenicol ;penem	reduced permeability to ;resistance by absence
ARO:3000849	AAF09244.1	SFH-1	Serratia fonticola	AF197943	SFH beta-lactamase	carbapenem	inactivation
ARO:3001075	AAC98092.2	SHV-16	Klebsiella pneumoniae	AF072684	SHV beta-lactamase	carbapenem;cephalosporin;penam	inactivation
ARO:3001119	ABA06586.1	SHV-64	Klebsiella pneumoniae	DQ174304	SHV beta-lactamase	carbapenem;cephalosporin;penam	inactivation
ARO:3003556	AAT90846.1	SLB-1	Shewanella livingstonensis	AY590118	SHW beta-lactamase	cephalosporin;penam	inactivation
ARO:3000854	BAL14456.1	SMB-1 beta-lactamase	Serratia marcescens	AB636283	SMB beta-lactamase	carbapenem;cephalosporin;penam	inactivation
ARO:3002380	AAG29813.1	SME-2	Serratia marcescens	AF275256	SME beta-lactamase	carbapenem	inactivation
ARO:3002381	AAS92558.1	SME-3	Serratia marcescens	AY584237	SME beta-lactamase	carbapenem	inactivation
ARO:3002383	AHV85514.1	SME-5	Serratia marcescens	KJ188748	SME beta-lactamase	carbapenem	inactivation
ARO:3003051	AAD51344.1	smeA	Stenotrophomonas maltophilia	AF173226	resistance-nodulation-cell division (RND) efflux pump	macrolide ;fluoroquinolone ;monobactam;aminoglycoside ;carbapenem;cephalosporin;glycylcycline;cephamycin;penam;tetracycline ;acridine dye;aminocoumarin ;diaminopyrimidine ;phenicol ;triclosan;antibacterial free fatty acids	efflux
ARO:3003052	AAD51345.1	smeB	Stenotrophomonas maltophilia	AF173226	resistance-nodulation-cell division (RND) efflux pump	macrolide ;fluoroquinolone ;monobactam;aminoglycoside ;carbapenem;cephalosporin;glycylcycline;cephamycin;penam;tetracycline ;acridine dye;aminocoumarin ;diaminopyrimidine ;phenicol ;triclosan;antibacterial free fatty acids	efflux
ARO:3003053	AAD51346.1	smeC	Stenotrophomonas maltophilia	AF173226	resistance-nodulation-cell division (RND) efflux pump	macrolide ;fluoroquinolone ;monobactam;aminoglycoside ;carbapenem;cephalosporin;glycylcycline;cephamycin;penam;tetracycline ;acridine dye;aminocoumarin ;diaminopyrimidine ;phenicol ;triclosan;antibacterial free fatty acids	efflux
ARO:3003055	CAC14594.1	smeD	Stenotrophomonas maltophilia	AJ252200	resistance-nodulation-cell division (RND) efflux pump	macrolide ;fluoroquinolone ;monobactam;aminoglycoside ;carbapenem;glycylcycline;penam;tetracycline ;acridine dye;aminocoumarin ;diaminopyrimidine ;phenicol ;triclosan;antibacterial free fatty acids	efflux
ARO:3003056	CAC14595.1	smeE	Stenotrophomonas maltophilia	AJ252200	resistance-nodulation-cell division (RND) efflux pump	macrolide ;fluoroquinolone ;monobactam;aminoglycoside ;carbapenem;glycylcycline;penam;tetracycline ;acridine dye;aminocoumarin ;diaminopyrimidine ;phenicol ;triclosan;antibacterial free fatty acids	efflux
ARO:3003057	CAC14596.1	smeF	Stenotrophomonas maltophilia	AJ252200	resistance-nodulation-cell division (RND) efflux pump	macrolide ;fluoroquinolone ;monobactam;aminoglycoside ;carbapenem;glycylcycline;penam;tetracycline ;acridine dye;aminocoumarin ;diaminopyrimidine ;phenicol ;triclosan;antibacterial free fatty acids	efflux
ARO:3003066	AAD51348.1	smeR	Stenotrophomonas maltophilia	AF173226.1	resistance-nodulation-cell division (RND) efflux pump	macrolide ;fluoroquinolone ;monobactam;aminoglycoside ;carbapenem;cephalosporin;glycylcycline;cephamycin;penam;tetracycline ;acridine dye;aminocoumarin ;diaminopyrimidine ;phenicol ;triclosan;antibacterial free fatty acids	efflux
ARO:3003067	AAD51347.1	smeS	Stenotrophomonas maltophilia	AF173226	resistance-nodulation-cell division (RND) efflux pump	macrolide ;fluoroquinolone ;monobactam;aminoglycoside ;carbapenem;cephalosporin;glycylcycline;cephamycin;penam;tetracycline ;acridine dye;aminocoumarin ;diaminopyrimidine ;phenicol ;triclosan;antibacterial free fatty acids	efflux
ARO:3003720	AJP77080	SPG-1	Sphingomonas sp. ALS-13	KP109680	SPG beta-lacatamase	carbapenem	inactivation
ARO:3003793	CAD37801.1	SPM-1	Pseudomonas aeruginosa	AJ492820.1	SPM beta-lactamase	carbapenem	inactivation
ARO:3002828	CAA45050.1	srmB	Streptomyces ambofaciens	X63451	ABC-F ATP-binding cassette ribosomal protection protein	macrolide ;lincosamide ;streptogramin ;tetracycline ;oxazolidinone ;phenicol ;pleuromutilin	target protection
ARO:3002493	BAA23130.1	SRT-1	Serratia marcescens	AB008454	SRT beta-lactamase	cephalosporin	inactivation
ARO:3002494	AAS07017.3	SRT-2	Serratia marcescens	AY524276	SRT beta-lactamase	cephalosporin	inactivation
ARO:3004699	AAA88560.1	sta	Streptomyces lavendulae	M16183.1	streptothricin acetyltransferase (SAT)	nucleoside	inactivation
ARO:3003074	ABD31357.1	Staphylococcus aureus cls conferring resistance to daptomycin	Staphylococcus aureus subsp. aureus NCTC 8325	CP000253.1	daptomycin resistant cls	peptide	target alteration
ARO:3003901	CAG39357	Staphylococcus aureus GlpT with mutation conferring resistance to fosfomycin	Staphylococcus aureus subsp. aureus MRSA252	BX571856.1	GlpT	fosfomycin	target alteration
ARO:3003296	YP_039483.1	Staphylococcus aureus gyrA conferring resistance to fluoroquinolones	Staphylococcus aureus subsp. aureus MRSA252	NC_002952	fluoroquinolone resistant gyrA	fluoroquinolone ;nybomycin	target alteration
ARO:3003301	CAG39033.1	Staphylococcus aureus gyrB conferring resistance to aminocoumarin	Staphylococcus aureus subsp. aureus MRSA252	BX571856.1	aminocoumarin resistant gyrB	aminocoumarin	target alteration
ARO:3003729	CAA52296.1	Staphylococcus aureus ileS with mutation conferring resistance to mupirocin	Staphylococcus aureus	X74219	resistant isoleucyl-tRNA synthetase (ileS)	mupirocin	target alteration
ARO:3003917	ABD30105.1	Staphylococcus aureus menA with mutation conferring resistance to lysocin	Staphylococcus aureus subsp. aureus NCTC 8325	CP000253.1	lysocin resistant menA	peptide	target alteration
ARO:3003319	ADJ67256	Staphylococcus aureus mprF mutations conferring resistance to daptomycin	Staphylococcus aureus	HM140977	daptomycin resistant mprF	peptide	target alteration
ARO:3003776	CAG41169.1	Staphylococcus aureus murA with mutation conferring resistance to fosfomycin	Staphylococcus aureus subsp. aureus MRSA252	BX571856.1	murA transferase	fosfomycin	target alteration
ARO:3004667	BAA14147.1	Staphylococcus aureus norA	Staphylococcus aureus	D90119.1	major facilitator superfamily (MFS) efflux pump	macrolide ;fluoroquinolone ;lincosamide ;fosfomycin;cephalosporin;glycylcycline;bicyclomycin;penam;nucleoside ;tetracycline ;peptide ;acridine dye;oxazolidinone ;rifamycin ;diaminopyrimidine ;phenicol ;isoniazid;benzalkonium chloride;rhodamine;antibacterial free fatty acids;nitroimidazole	efflux
ARO:3003312	CAG40365.1	Staphylococcus aureus parC conferring resistance to fluoroquinolone	Staphylococcus aureus subsp. aureus MRSA252	BX571856.1	fluoroquinolone resistant parC;fluoroquinolone self resistant parC	fluoroquinolone	target alteration
ARO:3003315	CAG40364.1	Staphylococcus aureus parE conferring resistance to fluoroquinolones	Staphylococcus aureus subsp. aureus MRSA252	BX571856.1	fluoroquinolone resistant parE	fluoroquinolone	target alteration
ARO:3003323	BAB95031.1	Staphylococcus aureus pgsA mutations conferring resistance to daptomycin	Staphylococcus aureus subsp. aureus MW2	BA000033.2	daptomycin resistant pgsA	peptide	target alteration
ARO:3003285	CAG39568.1	Staphylococcus aureus rpoB mutants conferring resistance to daptomycin	Staphylococcus aureus subsp. aureus MRSA252	BX571856.1	rifamycin-resistant beta-subunit of RNA polymerase (rpoB)	peptide ;rifamycin	target alteration; target replacement
ARO:3003291	CAG39569.1	Staphylococcus aureus rpoC conferring resistance to daptomycin	Staphylococcus aureus subsp. aureus MRSA252	BX571856.1	daptomycin-resistant beta prime subunit of RNA polymerase (rpoC)	peptide	target alteration
ARO:3003902	CAG39240	Staphylococcus aureus UhpT with mutation conferring resistance to fosfomycin	Staphylococcus aureus subsp. aureus MRSA252	BX571856.1	UhpT	fosfomycin	target alteration
ARO:3003794	CAG39047	Staphylococcus aureus walK with mutation conferring daptomycin resistance	Staphylococcus aureus subsp. aureus MRSA252	BX571856	daptomycin resistant walK	peptide	target alteration
ARO:3003735	CAG39573	Staphylococcus mutant fusA gene conferring resistance to fusidic acid	Staphylococcus aureus subsp. aureus MRSA252	BX571856	resistant fusA	fusidic acid	target alteration
ARO:3003737	ADL24064.1	Staphylococcus mutant fusE gene conferring resistance to fusidic acid	Staphylococcus aureus subsp. aureus JKD6159	CP002114.2	resistant fusE	fusidic acid	target alteration
ARO:3004572	AAW38464.1	Staphylococcys aureus LmrS	Staphylococcus aureus subsp. aureus COL	CP000046.1	major facilitator superfamily (MFS) efflux pump	macrolide ;fluoroquinolone ;aminoglycoside ;lincosamide ;fosfomycin;cephalosporin;glycylcycline;bicyclomycin;penam;nucleoside ;tetracycline ;peptide ;acridine dye;oxazolidinone ;rifamycin ;diaminopyrimidine ;phenicol ;isoniazid;benzalkonium chloride;rhodamine;antibacterial free fatty acids;nitroimidazole	efflux
ARO:3003774	AAN00989.1	Streptococcus agalactiae mprF	Streptococcus agalactiae 2603V/R	AE009948.1	defensin resistant mprF	peptide	target alteration
ARO:3004097	AQA08261.1	Streptococcus mitis CdsA with mutation conferring daptomycin resistance	Streptococcus oralis	CP019562.1	daptomycin resistant CdsA	peptide	target alteration
ARO:3003311	AAK74984.1	Streptococcus pneumoniae parC conferring resistance to fluoroquinolone	Streptococcus pneumoniae TIGR4	AE005672	fluoroquinolone resistant parC;fluoroquinolone self resistant parC	fluoroquinolone	target alteration
ARO:3003041	AFC91828.1	Streptococcus pneumoniae PBP1a conferring resistance to amoxicillin	Streptococcus pneumoniae	JN645776	Penicillin-binding protein mutations conferring resistance to beta-lactam s	monobactam;carbapenem;cephalosporin;cephamycin;penam	target alteration
ARO:3003043	AFC91898.1	Streptococcus pneumoniae PBP2x conferring resistance to amoxicillin	Streptococcus pneumoniae	JN645706	Penicillin-binding protein mutations conferring resistance to beta-lactam s	monobactam;carbapenem;cephalosporin;cephamycin;penam	target alteration
ARO:3003387	AAL97684.1	Streptococcus pyogenes folP with mutation conferring resistance to sulfonamides	Streptococcus pyogenes MGAS8232	AE009949	sulfonamide resistant dihydropteroate synthase folP	sulfonamide ;sulfone	target alteration
ARO:3003359	CAA67349.1	Streptomyces cinnamoneus EF-Tu mutants conferring resistance to elfamycin	Streptomyces cinnamoneus	X98831.1	elfamycin resistant EF-Tu;kirromycin self resistant EF-Tu	elfamycin	target alteration
ARO:3003318	AAO47226.2	Streptomyces rishiriensis parY mutant conferring resistance to aminocoumarin	Streptomyces rishiriensis	AF235050.4	aminocoumarin resistant parY;aminocoumarin self resistant parY	aminocoumarin	target alteration
ARO:3000410	AEJ33969.1	sul1	Vibrio fluvialis	JF969163	sulfonamide resistant sul	sulfonamide ;sulfone	target replacement
ARO:3000412	AAL59753.1	sul2	Vibrio cholerae	AY055428.1	sulfonamide resistant sul	sulfonamide ;sulfone	target replacement
ARO:3000413	ACJ63260.1	sul3	Escherichia coli	FJ196385	sulfonamide resistant sul	sulfonamide ;sulfone	target replacement
ARO:3004361	AUI09862.1	sul4	uncultured bacterium Partial	MG649393.1	sulfonamide resistant sul	sulfonamide	target replacement
ARO:3003986	APB03219.1	TaeA	Paenibacillus sp. LC231	KX531049.1	ATP-binding cassette (ABC) efflux pump	macrolide ;fluoroquinolone ;cephalosporin;penam;tetracycline ;peptide ;acridine dye;rifamycin ;pleuromutilin ;nitroimidazole	efflux
ARO:3000343	CAA03986.1	tap	Mycolicibacterium fortuitum	AJ000283	major facilitator superfamily (MFS) efflux pump	macrolide ;fluoroquinolone ;lincosamide ;fosfomycin;cephalosporin;glycylcycline;bicyclomycin;penam;nucleoside ;tetracycline ;peptide ;acridine dye;oxazolidinone ;rifamycin ;diaminopyrimidine ;phenicol ;isoniazid;benzalkonium chloride;rhodamine;antibacterial free fatty acids;nitroimidazole	efflux
ARO:3002893	BAA07390.1	tcr3	Kitasatospora aureofaciens	D38215	major facilitator superfamily (MFS) efflux pump	macrolide ;fluoroquinolone ;lincosamide ;fosfomycin;cephalosporin;glycylcycline;bicyclomycin;penam;nucleoside ;tetracycline ;peptide ;acridine dye;oxazolidinone ;rifamycin ;diaminopyrimidine ;phenicol ;isoniazid;benzalkonium chloride;rhodamine;antibacterial free fatty acids;nitroimidazole	efflux
ARO:3000873	CAD09800.1	TEM-1	Salmonella enterica subsp. enterica serovar Typhi str. CT18	AL513383	TEM beta-lactamase	monobactam;cephalosporin;penam;penem	inactivation
ARO:3000983	AAQ01671.1	TEM-121	Escherichia coli	AY271267	TEM beta-lactamase	monobactam;cephalosporin;penam;penem	inactivation
ARO:3000963	AAM22276.1	TEM-96	Escherichia coli	AY092401	TEM beta-lactamase	monobactam;cephalosporin;penam;penem	inactivation
ARO:3000561	AAD09860.1	tet(30)	Agrobacterium fabrum str. C58	AF090987	major facilitator superfamily (MFS) efflux pump	macrolide ;fluoroquinolone ;lincosamide ;fosfomycin;cephalosporin;glycylcycline;bicyclomycin;penam;nucleoside ;tetracycline ;peptide ;acridine dye;oxazolidinone ;rifamycin ;diaminopyrimidine ;phenicol ;isoniazid;benzalkonium chloride;rhodamine;antibacterial free fatty acids;nitroimidazole	efflux
ARO:3000476	CAC80727.1	tet(31)	Aeromonas salmonicida subsp. salmonicida	AJ250203	major facilitator superfamily (MFS) efflux pump	macrolide ;fluoroquinolone ;lincosamide ;fosfomycin;cephalosporin;glycylcycline;bicyclomycin;penam;nucleoside ;tetracycline ;peptide ;acridine dye;oxazolidinone ;rifamycin ;diaminopyrimidine ;phenicol ;isoniazid;benzalkonium chloride;rhodamine;antibacterial free fatty acids;nitroimidazole	efflux
ARO:3000478	CAD12227.2	tet(33)	Corynebacterium glutamicum	AJ420072.1	major facilitator superfamily (MFS) efflux pump	macrolide ;fluoroquinolone ;lincosamide ;fosfomycin;cephalosporin;glycylcycline;bicyclomycin;penam;nucleoside ;tetracycline ;peptide ;acridine dye;oxazolidinone ;rifamycin ;diaminopyrimidine ;phenicol ;isoniazid;benzalkonium chloride;rhodamine;antibacterial free fatty acids;nitroimidazole	efflux
ARO:3000481	AAK37619.1	tet(35)	Vibrio harveyi	AF353562.1	ATP-binding cassette (ABC) efflux pump	macrolide ;fluoroquinolone ;cephalosporin;penam;tetracycline ;peptide ;acridine dye;rifamycin ;pleuromutilin ;nitroimidazole	efflux
ARO:3000565	AAV80464.1	tet(38)	Staphylococcus aureus	AY825285	major facilitator superfamily (MFS) efflux pump	macrolide ;fluoroquinolone ;lincosamide ;fosfomycin;cephalosporin;glycylcycline;bicyclomycin;penam;nucleoside ;tetracycline ;peptide ;acridine dye;oxazolidinone ;rifamycin ;diaminopyrimidine ;phenicol ;isoniazid;benzalkonium chloride;rhodamine;antibacterial free fatty acids;nitroimidazole	efflux
ARO:3000566	AAW66497.1	tet(39)	Acinetobacter sp. LUH5605	AY743590	major facilitator superfamily (MFS) efflux pump	macrolide ;fluoroquinolone ;lincosamide ;fosfomycin;cephalosporin;glycylcycline;bicyclomycin;penam;nucleoside ;tetracycline ;peptide ;acridine dye;oxazolidinone ;rifamycin ;diaminopyrimidine ;phenicol ;isoniazid;benzalkonium chloride;rhodamine;antibacterial free fatty acids;nitroimidazole	efflux
ARO:3000567	CAM12479.1	tet(40)	uncultured bacterium	AM419751	major facilitator superfamily (MFS) efflux pump	macrolide ;fluoroquinolone ;lincosamide ;fosfomycin;cephalosporin;glycylcycline;bicyclomycin;penam;nucleoside ;tetracycline ;peptide ;acridine dye;oxazolidinone ;rifamycin ;diaminopyrimidine ;phenicol ;isoniazid;benzalkonium chloride;rhodamine;antibacterial free fatty acids;nitroimidazole	efflux
ARO:3000569	AAP93922.1	tet(41)	Serratia marcescens	AY264780.2	major facilitator superfamily (MFS) efflux pump	macrolide ;fluoroquinolone ;lincosamide ;fosfomycin;cephalosporin;glycylcycline;bicyclomycin;penam;nucleoside ;tetracycline ;peptide ;acridine dye;oxazolidinone ;rifamycin ;diaminopyrimidine ;phenicol ;isoniazid;benzalkonium chloride;rhodamine;antibacterial free fatty acids;nitroimidazole	efflux
ARO:3000572	ACD35503.1	tet(42)	Micrococcus sp. SMCC G887	EU523697	major facilitator superfamily (MFS) efflux pump	macrolide ;fluoroquinolone ;lincosamide ;fosfomycin;cephalosporin;glycylcycline;bicyclomycin;penam;nucleoside ;tetracycline ;peptide ;acridine dye;oxazolidinone ;rifamycin ;diaminopyrimidine ;phenicol ;isoniazid;benzalkonium chloride;rhodamine;antibacterial free fatty acids;nitroimidazole	efflux
ARO:3000573	ACS83748.1	tet(43)	uncultured bacterium AOTet43	GQ244501.1	major facilitator superfamily (MFS) efflux pump	macrolide ;fluoroquinolone ;lincosamide ;fosfomycin;cephalosporin;glycylcycline;bicyclomycin;penam;nucleoside ;tetracycline ;peptide ;acridine dye;oxazolidinone ;rifamycin ;diaminopyrimidine ;phenicol ;isoniazid;benzalkonium chloride;rhodamine;antibacterial free fatty acids;nitroimidazole	efflux
ARO:3003196	AEM62948.1	tet(45)	Bhargavaea cecembensis	JF837330.1	major facilitator superfamily (MFS) efflux pump	macrolide ;fluoroquinolone ;lincosamide ;fosfomycin;cephalosporin;glycylcycline;bicyclomycin;penam;nucleoside ;tetracycline ;peptide ;acridine dye;oxazolidinone ;rifamycin ;diaminopyrimidine ;phenicol ;isoniazid;benzalkonium chloride;rhodamine;antibacterial free fatty acids;nitroimidazole	efflux
ARO:3004581	AKQ05892.1	tet(48)	uncultured bacterium	KR857682.1	tetracycline-resistant ribosomal protection protein	tetracycline	target protection
ARO:3004582	AKQ05893.1	tet(49)	uncultured bacterium	KR857683.1	tetracycline-resistant ribosomal protection protein	tetracycline	target protection
ARO:3004584	AKQ05894.1	tet(50)	uncultured bacterium	KR857684.1	tetracycline-resistant ribosomal protection protein	tetracycline	target protection
ARO:3004586	AKQ05895.1	tet(51)	uncultured bacterium	KR857685.1	tetracycline-resistant ribosomal protection protein	tetracycline	target protection
ARO:3004587	AKQ05896.1	tet(52)	uncultured bacterium	KR857686.1	tetracycline-resistant ribosomal protection protein	tetracycline	target protection
ARO:3004589	AKQ05897.1	tet(53)	uncultured bacterium	KR857687.1	tetracycline-resistant ribosomal protection protein	tetracycline	target protection
ARO:3004590	AKQ05898.1	tet(54)	uncultured bacterium	KR857688.1	tetracycline-resistant ribosomal protection protein	tetracycline	target protection
ARO:3004591	AKQ05899.1	tet(55)	uncultured bacterium	KR857689.1	tetracycline-resistant ribosomal protection protein	tetracycline	target protection
ARO:3004603	ARB93503.1	tet(56)	Legionella longbeachae	CP020412.2	tetracycline-resistant ribosomal protection protein	tetracycline	target protection
ARO:3004441	AMP42492.1	tet(59)	uncultured bacterium IN-14	KU736879.1	major facilitator superfamily (MFS) efflux pump	macrolide ;fluoroquinolone ;lincosamide ;fosfomycin;cephalosporin;glycylcycline;bicyclomycin;penam;nucleoside ;tetracycline ;peptide ;acridine dye;oxazolidinone ;rifamycin ;diaminopyrimidine ;phenicol ;isoniazid;benzalkonium chloride;rhodamine;antibacterial free fatty acids;nitroimidazole	efflux
ARO:3000165	AAN06707.1	tet(A)	Shigella sonnei	AF534183.1	major facilitator superfamily (MFS) efflux pump	macrolide ;fluoroquinolone ;lincosamide ;fosfomycin;cephalosporin;glycylcycline;bicyclomycin;penam;nucleoside ;tetracycline ;peptide ;acridine dye;oxazolidinone ;rifamycin ;diaminopyrimidine ;phenicol ;isoniazid;benzalkonium chloride;rhodamine;antibacterial free fatty acids;nitroimidazole	efflux
ARO:3000166	BAC67143.1	tet(B)	Gram-negative bacterium TC71	AB089595	major facilitator superfamily (MFS) efflux pump	macrolide ;fluoroquinolone ;lincosamide ;fosfomycin;cephalosporin;glycylcycline;bicyclomycin;penam;nucleoside ;tetracycline ;peptide ;acridine dye;oxazolidinone ;rifamycin ;diaminopyrimidine ;phenicol ;isoniazid;benzalkonium chloride;rhodamine;antibacterial free fatty acids;nitroimidazole	efflux
ARO:3000167	AAK97755.1	tet(C)	Aeromonas salmonicida	AY043299.1	major facilitator superfamily (MFS) efflux pump	macrolide ;fluoroquinolone ;lincosamide ;fosfomycin;cephalosporin;glycylcycline;bicyclomycin;penam;nucleoside ;tetracycline ;peptide ;acridine dye;oxazolidinone ;rifamycin ;diaminopyrimidine ;phenicol ;isoniazid;benzalkonium chloride;rhodamine;antibacterial free fatty acids;nitroimidazole	efflux
ARO:3000168	AAL75563.1	tet(D)	Shigella flexneri Y	AF467077.1	major facilitator superfamily (MFS) efflux pump	macrolide ;fluoroquinolone ;lincosamide ;fosfomycin;cephalosporin;glycylcycline;bicyclomycin;penam;nucleoside ;tetracycline ;peptide ;acridine dye;oxazolidinone ;rifamycin ;diaminopyrimidine ;phenicol ;isoniazid;benzalkonium chloride;rhodamine;antibacterial free fatty acids;nitroimidazole	efflux
ARO:3000173	AAA71915.1	tet(E)	Escherichia coli	L06940	major facilitator superfamily (MFS) efflux pump	macrolide ;fluoroquinolone ;lincosamide ;fosfomycin;cephalosporin;glycylcycline;bicyclomycin;penam;nucleoside ;tetracycline ;peptide ;acridine dye;oxazolidinone ;rifamycin ;diaminopyrimidine ;phenicol ;isoniazid;benzalkonium chloride;rhodamine;antibacterial free fatty acids;nitroimidazole	efflux
ARO:3000174	AAD25538.1	tet(G)	Pseudomonas sp.	AF133139	major facilitator superfamily (MFS) efflux pump	macrolide ;fluoroquinolone ;lincosamide ;fosfomycin;cephalosporin;glycylcycline;bicyclomycin;penam;nucleoside ;tetracycline ;peptide ;acridine dye;oxazolidinone ;rifamycin ;diaminopyrimidine ;phenicol ;isoniazid;benzalkonium chloride;rhodamine;antibacterial free fatty acids;nitroimidazole	efflux
ARO:3000175	CAA75663.1	tet(H)	Pasteurella multocida	Y15510	major facilitator superfamily (MFS) efflux pump	macrolide ;fluoroquinolone ;lincosamide ;fosfomycin;cephalosporin;glycylcycline;bicyclomycin;penam;nucleoside ;tetracycline ;peptide ;acridine dye;oxazolidinone ;rifamycin ;diaminopyrimidine ;phenicol ;isoniazid;benzalkonium chloride;rhodamine;antibacterial free fatty acids;nitroimidazole	efflux
ARO:3000177	AAD12753.1	tet(J)	Proteus mirabilis	AF038993	major facilitator superfamily (MFS) efflux pump	macrolide ;fluoroquinolone ;lincosamide ;fosfomycin;cephalosporin;glycylcycline;bicyclomycin;penam;nucleoside ;tetracycline ;peptide ;acridine dye;oxazolidinone ;rifamycin ;diaminopyrimidine ;phenicol ;isoniazid;benzalkonium chloride;rhodamine;antibacterial free fatty acids;nitroimidazole	efflux
ARO:3000178	AAB28795.1	tet(K)	Staphylococcus aureus	S67449.1	major facilitator superfamily (MFS) efflux pump	macrolide ;fluoroquinolone ;lincosamide ;fosfomycin;cephalosporin;glycylcycline;bicyclomycin;penam;nucleoside ;tetracycline ;peptide ;acridine dye;oxazolidinone ;rifamycin ;diaminopyrimidine ;phenicol ;isoniazid;benzalkonium chloride;rhodamine;antibacterial free fatty acids;nitroimidazole	efflux
ARO:3000179	AAA22851.1	tet(L)	Geobacillus stearothermophilus	M11036	major facilitator superfamily (MFS) efflux pump	macrolide ;fluoroquinolone ;lincosamide ;fosfomycin;cephalosporin;glycylcycline;bicyclomycin;penam;nucleoside ;tetracycline ;peptide ;acridine dye;oxazolidinone ;rifamycin ;diaminopyrimidine ;phenicol ;isoniazid;benzalkonium chloride;rhodamine;antibacterial free fatty acids;nitroimidazole	efflux
ARO:3000181	AAB84282.1	tet(V)	Mycolicibacterium smegmatis MC2 155	AF030344.1	major facilitator superfamily (MFS) efflux pump	macrolide ;fluoroquinolone ;lincosamide ;fosfomycin;cephalosporin;glycylcycline;bicyclomycin;penam;nucleoside ;tetracycline ;peptide ;acridine dye;oxazolidinone ;rifamycin ;diaminopyrimidine ;phenicol ;isoniazid;benzalkonium chloride;rhodamine;antibacterial free fatty acids;nitroimidazole	efflux
ARO:3004442	AMP42147.1	tet(W/N/W)	uncultured bacterium IN-02	KU736867.1	tetracycline-resistant ribosomal protection protein	tetracycline	target protection
ARO:3004719	QBQ85438.1	Tet(X3)	Acinetobacter baumannii	MK134375.1	tetracycline inactivation enzyme	glycylcycline;tetracycline	inactivation
ARO:3004720	QBQ69719.1	Tet(X4)	Escherichia coli	MK134376.1	tetracycline inactivation enzyme	glycylcycline;tetracycline	inactivation
ARO:3000182	AAC72341.1	tet(Y)	IncQ plasmid pIE1120	AF070999	major facilitator superfamily (MFS) efflux pump	macrolide ;fluoroquinolone ;lincosamide ;fosfomycin;cephalosporin;glycylcycline;bicyclomycin;penam;nucleoside ;tetracycline ;peptide ;acridine dye;oxazolidinone ;rifamycin ;diaminopyrimidine ;phenicol ;isoniazid;benzalkonium chloride;rhodamine;antibacterial free fatty acids;nitroimidazole	efflux
ARO:3000183	AAD25063.1	tet(Z)	Corynebacterium glutamicum	AF121000.1	major facilitator superfamily (MFS) efflux pump	macrolide ;fluoroquinolone ;lincosamide ;fosfomycin;cephalosporin;glycylcycline;bicyclomycin;penam;nucleoside ;tetracycline ;peptide ;acridine dye;oxazolidinone ;rifamycin ;diaminopyrimidine ;phenicol ;isoniazid;benzalkonium chloride;rhodamine;antibacterial free fatty acids;nitroimidazole	efflux
ARO:3000196	ACH87088.1	tet32	Escherichia coli	EU722333.1	tetracycline-resistant ribosomal protection protein	tetracycline	target protection
ARO:3000197	CAD55718.1	tet36	Bacteroides coprosuis DSM 18011	AJ514254	tetracycline-resistant ribosomal protection protein	tetracycline	target protection
ARO:3002871	AAN28721.1	tet37	uncultured bacterium	AF540889	tetracycline inactivation enzyme	tetracycline	inactivation
ARO:3000556	CBH51823.1	tet44	Campylobacter fetus subsp. fetus	FN594949	tetracycline-resistant ribosomal protection protein	tetracycline	target protection
ARO:3004032	AET10444.1	tetA(46)	Streptococcus australis	HQ652506.1	ATP-binding cassette (ABC) efflux pump	macrolide ;fluoroquinolone ;cephalosporin;penam;tetracycline ;peptide ;acridine dye;rifamycin ;pleuromutilin ;nitroimidazole	efflux
ARO:3003980	APB03214.1	tetA(48)	Paenibacillus sp. LC231	KX531044.1	major facilitator superfamily (MFS) efflux pump	macrolide ;fluoroquinolone ;lincosamide ;fosfomycin;cephalosporin;glycylcycline;bicyclomycin;penam;nucleoside ;tetracycline ;peptide ;acridine dye;oxazolidinone ;rifamycin ;diaminopyrimidine ;phenicol ;isoniazid;benzalkonium chloride;rhodamine;antibacterial free fatty acids;nitroimidazole	efflux
ARO:3004035	ANZ79240.1	tetA(60)	uncultured bacterium	KX000272.1	ATP-binding cassette (ABC) efflux pump	macrolide ;fluoroquinolone ;cephalosporin;penam;tetracycline ;peptide ;acridine dye;rifamycin ;pleuromutilin ;nitroimidazole	efflux
ARO:3000180	AAA20116.1	tetA(P)	Clostridium perfringens	L20800	major facilitator superfamily (MFS) efflux pump	macrolide ;fluoroquinolone ;lincosamide ;fosfomycin;cephalosporin;glycylcycline;bicyclomycin;penam;nucleoside ;tetracycline ;peptide ;acridine dye;oxazolidinone ;rifamycin ;diaminopyrimidine ;phenicol ;isoniazid;benzalkonium chloride;rhodamine;antibacterial free fatty acids;nitroimidazole	efflux
ARO:3004033	AET10445.1	tetB(46)	Streptococcus australis	HQ652506.1	ATP-binding cassette (ABC) efflux pump	macrolide ;fluoroquinolone ;cephalosporin;penam;tetracycline ;peptide ;acridine dye;rifamycin ;pleuromutilin ;nitroimidazole	efflux
ARO:3003981	APB03215.1	tetB(48)	Paenibacillus sp. LC231	KX531045.1	major facilitator superfamily (MFS) efflux pump	macrolide ;fluoroquinolone ;lincosamide ;fosfomycin;cephalosporin;glycylcycline;bicyclomycin;penam;nucleoside ;tetracycline ;peptide ;acridine dye;oxazolidinone ;rifamycin ;diaminopyrimidine ;phenicol ;isoniazid;benzalkonium chloride;rhodamine;antibacterial free fatty acids;nitroimidazole	efflux
ARO:3004036	ANZ79241.1	tetB(60)	uncultured bacterium	KX000273.1	ATP-binding cassette (ABC) efflux pump	macrolide ;fluoroquinolone ;cephalosporin;penam;tetracycline ;peptide ;acridine dye;rifamycin ;pleuromutilin ;nitroimidazole	efflux
ARO:3000195	AAA20117.1	tetB(P)	Clostridium perfringens	L20800	tetracycline-resistant ribosomal protection protein	tetracycline	target protection
ARO:3000186	CAQ49384.1	tetM	Staphylococcus aureus subsp. aureus ST398	AM990992.1	tetracycline-resistant ribosomal protection protein	tetracycline	target protection
ARO:3000190	AAA23033.2	tetO	Campylobacter jejuni	M18896.2	tetracycline-resistant ribosomal protection protein	tetracycline	target protection
ARO:3000191	CAA79727.1	tetQ	Bacteroides fragilis	Z21523	tetracycline-resistant ribosomal protection protein	tetracycline	target protection
ARO:3003479	CAD09823.1	tetR	Salmonella enterica subsp. enterica serovar Typhi str. CT18	AL513383	major facilitator superfamily (MFS) efflux pump	macrolide ;fluoroquinolone ;lincosamide ;fosfomycin;cephalosporin;glycylcycline;bicyclomycin;penam;nucleoside ;tetracycline ;peptide ;acridine dye;oxazolidinone ;rifamycin ;diaminopyrimidine ;phenicol ;isoniazid;benzalkonium chloride;rhodamine;antibacterial free fatty acids;nitroimidazole	target alteration; efflux
ARO:3000192	AAA25293.1	tetS	Listeria monocytogenes	L09756	tetracycline-resistant ribosomal protection protein	tetracycline	target protection
ARO:3000193	AAF01499.1	tetT	Streptococcus pyogenes	L42544	tetracycline-resistant ribosomal protection protein	tetracycline	target protection
ARO:3000194	CAA10975.1	tetW	Butyrivibrio fibrisolvens	AJ222769.3	tetracycline-resistant ribosomal protection protein	tetracycline	target protection
ARO:3000205	AAA27471.1	tetX	Bacteroides fragilis	M37699	tetracycline inactivation enzyme	glycylcycline;tetracycline	inactivation
ARO:3000851	CAC33832.1	THIN-B beta-lactamase	Janthinobacterium lividum	AJ250876	THIN-B beta-lactamase	carbapenem;cephalosporin;penam	inactivation
ARO:3003202	AAD37403.1	TLA-1	Escherichia coli	AF148067	TLA beta-lactamase	fluoroquinolone ;monobactam;cephalosporin	inactivation
ARO:3003203	CAG27800.1	TLA-2	uncultured bacterium	AJ698325.1	TLA beta-lactamase	fluoroquinolone ;monobactam;cephalosporin	inactivation
ARO:3003204	BAQ22139.1	TLA-3	Serratia marcescens	AP014611.1	TLA beta-lactamase	fluoroquinolone ;monobactam;cephalosporin	inactivation
ARO:3001299	AAD12162.1	tlrB conferring tylosin resistance	Streptomyces fradiae	AF055922	non-erm 23S ribosomal RNA methyltransferase (G748)	macrolide ;lincosamide	target alteration
ARO:3002827	AAA26832.1	tlrC	Streptomyces fradiae	M57437	ABC-F ATP-binding cassette ribosomal protection protein	macrolide ;lincosamide ;streptogramin ;tetracycline ;oxazolidinone ;phenicol ;pleuromutilin	target protection
ARO:3003059	CAB12108.2	tmrB	Bacillus subtilis subsp. subtilis str. 168	AL009126.3	tunicamycin resistance protein	nucleoside	reduced permeability to
ARO:3000237	ACN32294.1	tolC	Escherichia coli	FJ768952	ATP-binding cassette (ABC) efflux pump;major facilitator superfamily (MFS) efflux pump;resistance-nodulation-cell division (RND) efflux pump	macrolide ;fluoroquinolone ;monobactam;aminoglycoside ;lincosamide ;carbapenem;fosfomycin;cephalosporin;glycylcycline;cephamycin;bicyclomycin;penam;nucleoside ;tetracycline ;peptide ;acridine dye;oxazolidinone ;aminocoumarin ;rifamycin ;diaminopyrimidine ;phenicol ;isoniazid;pleuromutilin ;triclosan;penem;benzalkonium chloride;rhodamine;antibacterial free fatty acids;nitroimidazole	efflux
ARO:3003679	AAG03546.1	TriA	Pseudomonas aeruginosa PAO1	AE004091.2	resistance-nodulation-cell division (RND) efflux pump	macrolide ;fluoroquinolone ;monobactam;aminoglycoside ;carbapenem;glycylcycline;penam;tetracycline ;acridine dye;aminocoumarin ;diaminopyrimidine ;phenicol ;triclosan;antibacterial free fatty acids	efflux
ARO:3003680	AAG03547.1	TriB	Pseudomonas aeruginosa PAO1	AE004091.2	resistance-nodulation-cell division (RND) efflux pump	macrolide ;fluoroquinolone ;monobactam;aminoglycoside ;carbapenem;glycylcycline;penam;tetracycline ;acridine dye;aminocoumarin ;diaminopyrimidine ;phenicol ;triclosan;antibacterial free fatty acids	efflux
ARO:3003681	AAG03548.1	TriC	Pseudomonas aeruginosa PAO1	AE004091.2	resistance-nodulation-cell division (RND) efflux pump	macrolide ;fluoroquinolone ;monobactam;aminoglycoside ;carbapenem;glycylcycline;penam;tetracycline ;acridine dye;aminocoumarin ;diaminopyrimidine ;phenicol ;triclosan;antibacterial free fatty acids	efflux
ARO:3003060	AAA99931.1	tsnR	Streptomyces laurentii	L39157.1	non-erm 23S ribosomal RNA methyltransferase (A1067)	peptide	target alteration
ARO:3000844	AAN63648.1	TUS-1 beta-lactamase	Myroides odoratus DSM 2801	AF441287	TUS beta-lactamase	carbapenem;cephalosporin;cephamycin	inactivation
ARO:3004059	NP_253290.1	Type A NfxB	Pseudomonas aeruginosa PAO1	NC_002516.2	resistance-nodulation-cell division (RND) efflux pump	macrolide ;fluoroquinolone ;monobactam;aminoglycoside ;carbapenem;cephalosporin;glycylcycline;penam;tetracycline ;acridine dye;aminocoumarin ;diaminopyrimidine ;phenicol ;triclosan;antibacterial free fatty acids	efflux
ARO:3003577	AAC75089.1	ugd	Escherichia coli str. K-12 substr. MG1655	U00096	pmr phosphoethanolamine transferase	peptide	target alteration
ARO:3003305	ACI60160.1	Ureaplasma urealyticum gyrB conferring resistance to fluoroquinolone	Ureaplasma urealyticum serovar 10 str. ATCC 33699	CP001184.1	fluoroquinolone resistant gyrB	fluoroquinolone ;aminocoumarin	target alteration
ARO:3003309	AAF30879.1	Ureaplasma urealyticum parC conferring resistance to fluoroquinolone	Ureaplasma parvum serovar 3 str. ATCC 700970	AF222894.1	fluoroquinolone resistant parC;fluoroquinolone self resistant parC	fluoroquinolone	target alteration
ARO:3000010	AAA65956.1	vanA	Enterococcus faecium	M97297	glycopeptide resistance gene cluster;van ligase	glycopeptide	target alteration
ARO:3000013	AHH83938.1	vanB	Enterococcus faecium	KF823969	glycopeptide resistance gene cluster;van ligase	glycopeptide	target alteration
ARO:3000368	AAA24786.1	vanC	Enterococcus gallinarum	AF162694	glycopeptide resistance gene cluster;van ligase	glycopeptide	target alteration
ARO:3000005	AAM09849.1	vanD	Enterococcus faecium	AY082011	glycopeptide resistance gene cluster;van ligase	glycopeptide	target alteration
ARO:3002907	AAL27442.1	vanE	Enterococcus faecalis	FJ872411	glycopeptide resistance gene cluster;van ligase	glycopeptide	target alteration
ARO:3002908	AAF36803.1	vanF	Paenibacillus popilliae ATCC 14706	AF155139	glycopeptide resistance gene cluster;van ligase	glycopeptide	target alteration
ARO:3002909	ABA71731.1	vanG	Enterococcus faecalis	DQ212986	glycopeptide resistance gene cluster;van ligase	glycopeptide	target alteration
ARO:3002942	AAA65955.1	vanHA	Enterococcus faecium	M97297	vanH;glycopeptide resistance gene cluster	glycopeptide	target alteration
ARO:3002943	AAB05626.1	vanHB	Enterococcus faecalis	U35369	vanH;glycopeptide resistance gene cluster	glycopeptide	target alteration
ARO:3002944	AAM09850.1	vanHD	Enterococcus faecium	AY082011	vanH;glycopeptide resistance gene cluster	glycopeptide	target alteration
ARO:3002945	AAF36802.1	vanHF	Paenibacillus popilliae ATCC 14706	AF155139	vanH;glycopeptide resistance gene cluster	glycopeptide	target alteration
ARO:3002947	ACL82960.1	vanHM	Enterococcus faecium	FJ349556	vanH;glycopeptide resistance gene cluster	glycopeptide	target alteration
ARO:3002948	AHA41499.1	vanHO	Rhodococcus hoagii	KF478993	vanH;glycopeptide resistance gene cluster	glycopeptide	target alteration
ARO:3003723	KTE89608.1	vanI	Desulfitobacterium hafniense	LOCK01000072.1	glycopeptide resistance gene cluster;van ligase	glycopeptide	target alteration
ARO:3002914	CAB45459.1	vanJ	Streptomyces coelicolor A3(2)	AL939117.1	vanJ membrane protein	glycopeptide	target alteration
ARO:3003727	WP_011461306.1	vanKI	Desulfitobacterium hafniense	NC_007907.1	glycopeptide resistance gene cluster;vanK	glycopeptide	target alteration
ARO:3002910	ABX54687.1	vanL	Enterococcus faecalis	EU250284	glycopeptide resistance gene cluster;van ligase	glycopeptide	target alteration
ARO:3002911	ACL82961.1	vanM	Enterococcus faecium	FJ349556	glycopeptide resistance gene cluster;van ligase	glycopeptide	target alteration
ARO:3002912	AEP40500.1	vanN	Enterococcus faecium	JF802084	glycopeptide resistance gene cluster;van ligase	glycopeptide	target alteration
ARO:3002913	AHA41500.1	vanO	Rhodococcus hoagii	KF478993	glycopeptide resistance gene cluster;van ligase	glycopeptide	target alteration
ARO:3002919	AAA65953.1	vanRA	Enterococcus faecium	M97297	glycopeptide resistance gene cluster;vanR	glycopeptide	target alteration
ARO:3002921	AAB05622.1	vanRB	Enterococcus faecalis	U35369	glycopeptide resistance gene cluster;vanR	glycopeptide	target alteration
ARO:3002922	AAF86641.1	vanRC	Enterococcus gallinarum	AF162694	glycopeptide resistance gene cluster;vanR	glycopeptide	target alteration
ARO:3002923	AAM09851.1	vanRD	Enterococcus faecium	AY082011	glycopeptide resistance gene cluster;vanR	glycopeptide	target alteration
ARO:3002924	AAL27445.1	vanRE	Enterococcus faecalis	FJ872411	glycopeptide resistance gene cluster;vanR	glycopeptide	target alteration
ARO:3002925	AAR84672.1	vanRF	Paenibacillus popilliae ATCC 14706	AF155139	glycopeptide resistance gene cluster;vanR	glycopeptide	target alteration
ARO:3002926	ABA71727.1	vanRG	Enterococcus faecalis	DQ212986	glycopeptide resistance gene cluster;vanR	glycopeptide	target alteration
ARO:3003728	BAE85478.1	vanRI	Desulfitobacterium hafniense Y51	AP008230.1	glycopeptide resistance gene cluster;vanR	glycopeptide	target alteration
ARO:3002927	ABX54691.1	vanRL	Enterococcus faecalis	EU250284	glycopeptide resistance gene cluster;vanR	glycopeptide	target alteration
ARO:3002928	ACL82957.1	vanRM	Enterococcus faecium	FJ349556	glycopeptide resistance gene cluster;vanR	glycopeptide	target alteration
ARO:3002929	AEP40503.1	vanRN	Enterococcus faecium	JF802084	glycopeptide resistance gene cluster;vanR	glycopeptide	target alteration
ARO:3002930	AHA41505.1	vanRO	Rhodococcus hoagii	KF478993.1	glycopeptide resistance gene cluster;vanR	glycopeptide	target alteration
ARO:3002931	AAA65954.1	vanSA	Enterococcus faecium	M97297	vanS;glycopeptide resistance gene cluster	glycopeptide	target alteration
ARO:3002932	AAB05623.1	vanSB	Enterococcus faecalis	U35369	vanS;glycopeptide resistance gene cluster	glycopeptide	target alteration
ARO:3002933	AAF86642.1	vanSC	Enterococcus gallinarum	AF162694	vanS;glycopeptide resistance gene cluster	glycopeptide	target alteration
ARO:3002934	ACM47284	vanSD	Enterococcus faecium	EU999036	vanS;glycopeptide resistance gene cluster	glycopeptide	target alteration
ARO:3002935	AAL27446.1	vanSE	Enterococcus faecalis	FJ872411	vanS;glycopeptide resistance gene cluster	glycopeptide	target alteration
ARO:3002936	AAR84673.1	vanSF	Paenibacillus popilliae ATCC 14706	AF155139	vanS;glycopeptide resistance gene cluster	glycopeptide	target alteration
ARO:3002937	ABA71728.1	vanSG	Enterococcus faecalis	DQ212986	vanS;glycopeptide resistance gene cluster	glycopeptide	target alteration
ARO:3002938	ABX54692.1	vanSL	Enterococcus faecalis	EU250284	vanS;glycopeptide resistance gene cluster	glycopeptide	target alteration
ARO:3002939	ACL82958.1	vanSM	Enterococcus faecium	FJ349556	vanS;glycopeptide resistance gene cluster	glycopeptide	target alteration
ARO:3002940	AEP40504.1	vanSN	Enterococcus faecium	JF802084	vanS;glycopeptide resistance gene cluster	glycopeptide	target alteration
ARO:3002941	AHA41504.1	vanSO	Rhodococcus hoagii	KF478993	vanS;glycopeptide resistance gene cluster	glycopeptide	target alteration
ARO:3002970	AAD22403.1	vanTC	Enterococcus gallinarum	AF162694	glycopeptide resistance gene cluster;vanT	glycopeptide	target alteration
ARO:3002971	AAL27444.1	vanTE	Enterococcus faecalis	FJ872411	glycopeptide resistance gene cluster;vanT	glycopeptide	target alteration
ARO:3002972	ABA71733.1	vanTG	Enterococcus faecalis	DQ212986	glycopeptide resistance gene cluster;vanT	glycopeptide	target alteration
ARO:3002973	ABX54689.1	vanTmL	Enterococcus faecalis	EU250284	glycopeptide resistance gene cluster;vanT	glycopeptide	target alteration
ARO:3002975	AEP40502.2	vanTN	Enterococcus faecium	JF802084	glycopeptide resistance gene cluster;vanT	glycopeptide	target alteration
ARO:3002974	ABX54690.1	vanTrL	Enterococcus faecalis	EU250284	glycopeptide resistance gene cluster;vanT	glycopeptide	target alteration
ARO:3004253	ABA71726.1	vanUG	Enterococcus faecalis	DQ212986	glycopeptide resistance gene cluster;vanU	glycopeptide	target alteration
ARO:3004254	AAO82019.1	vanVB	Enterococcus faecalis V583	AE016830	glycopeptide resistance gene cluster;vanV	glycopeptide	target alteration
ARO:3002964	AAB05625.1	vanWB	Enterococcus faecalis	U35369	vanW;glycopeptide resistance gene cluster	glycopeptide	target alteration
ARO:3002965	ABA71730.1	vanWG	Enterococcus faecalis	DQ212986	vanW;glycopeptide resistance gene cluster	glycopeptide	target alteration
ARO:3003724	BAE83690.1	vanWI	Desulfitobacterium hafniense Y51	AP008230.1	vanW;glycopeptide resistance gene cluster	glycopeptide	target alteration
ARO:3002949	AAA65957.1	vanXA	Enterococcus faecium	M97297	vanX;glycopeptide resistance gene cluster	glycopeptide	target alteration
ARO:3002950	AAB05628.1	vanXB	Enterococcus faecalis	U35369	vanX;glycopeptide resistance gene cluster	glycopeptide	target alteration
ARO:3003070	AAM09852.1	vanXD	Enterococcus faecium	AY082011	vanX;glycopeptide resistance gene cluster	glycopeptide	target alteration
ARO:3002952	AAF36804.1	vanXF	Paenibacillus popilliae ATCC 14706	AF155139	vanX;glycopeptide resistance gene cluster	glycopeptide	target alteration
ARO:3003725	ACL19707.1	vanXI	Desulfitobacterium hafniense DCB-2	CP001336.1	vanX;glycopeptide resistance gene cluster	glycopeptide	target alteration
ARO:3002953	ACL82962.1	vanXM	Enterococcus faecium	FJ349556	vanX;glycopeptide resistance gene cluster	glycopeptide	target alteration
ARO:3002954	AHA41501.1	vanXO	Rhodococcus hoagii	KF478993	vanX;glycopeptide resistance gene cluster	glycopeptide	target alteration
ARO:3002966	AAF61331.1	vanXYC	Enterococcus gallinarum	AF162694	glycopeptide resistance gene cluster;vanXY	glycopeptide	target alteration
ARO:3002967	AAL27443.1	vanXYE	Enterococcus faecalis	FJ872411	glycopeptide resistance gene cluster;vanXY	glycopeptide	target alteration
ARO:3003069	ABA71732.1	vanXYG	Enterococcus faecalis	DQ212986	glycopeptide resistance gene cluster;vanXY	glycopeptide	target alteration
ARO:3002968	ABX54688.1	vanXYL	Enterococcus faecalis	EU250284	glycopeptide resistance gene cluster;vanXY	glycopeptide	target alteration
ARO:3002969	AEP40501.1	vanXYN	Enterococcus faecium	JF802084	glycopeptide resistance gene cluster;vanXY	glycopeptide	target alteration
ARO:3002955	AAA65958.1	vanYA	Enterococcus faecium	M97297	vanY;glycopeptide resistance gene cluster	glycopeptide	target alteration
ARO:3002956	AAB05624.1	vanYB	Enterococcus faecalis	U35369	vanY;glycopeptide resistance gene cluster	glycopeptide	target alteration
ARO:3002958	AAF36805.1	vanYF	Paenibacillus popilliae ATCC 14706	AF155139	vanY;glycopeptide resistance gene cluster	glycopeptide	target alteration
ARO:3002959	ABA71729.1	vanYG1	Enterococcus faecalis	DQ212986	vanY;glycopeptide resistance gene cluster	glycopeptide	target alteration
ARO:3002961	ACL82959.1	vanYM	Enterococcus faecium	FJ349556	vanY;glycopeptide resistance gene cluster	glycopeptide	target alteration
ARO:3002962	AAA65959.1	vanZA	Enterococcus faecium	M97297	vanZ;glycopeptide resistance gene cluster	glycopeptide	target alteration
ARO:3002963	AAF36806.1	vanZF	Paenibacillus popilliae ATCC 14706	AF155139	vanZ;glycopeptide resistance gene cluster	glycopeptide	target alteration
ARO:3002840	AAA26683.1	vatA	Staphylococcus aureus	L07778	streptogramin vat acetyltransferase	streptogramin	inactivation
ARO:3002841	AAA86871.1	vatB	Staphylococcus aureus	U19459	streptogramin vat acetyltransferase	streptogramin	inactivation
ARO:3002842	AAC61671.1	vatC	Staphylococcus cohnii	AF015628	streptogramin vat acetyltransferase	streptogramin	inactivation
ARO:3002843	AAK84316.1	vatD	Enterococcus faecium	AF368302	streptogramin vat acetyltransferase	streptogramin	inactivation
ARO:3002844	AAF86220.1	vatE	Enterococcus faecium	AF242872	streptogramin vat acetyltransferase	streptogramin	inactivation
ARO:3003744	AAF63432	vatF	Yersinia enterocolitica	AF170730	streptogramin vat acetyltransferase	streptogramin	inactivation
ARO:3002845	ACX92987.1	vatH	Enterococcus faecium	GQ205627	streptogramin vat acetyltransferase	streptogramin	inactivation
ARO:3003987	APB03220.1	VatI	Paenibacillus sp. LC231	KX531050.1	streptogramin vat acetyltransferase	streptogramin	inactivation
ARO:3003712	AAK14294.1	VEB-1b	Pseudomonas aeruginosa	AF324834.1	VEB beta-lactamase	monobactam;cephalosporin	inactivation
ARO:3002372	AAS48620.1	VEB-3	Enterobacter cloacae	AY536519	VEB beta-lactamase	monobactam;cephalosporin	inactivation
ARO:3002373	ABM54868.1	VEB-4	Proteus mirabilis	EF136375	VEB beta-lactamase	monobactam;cephalosporin	inactivation
ARO:3002375	ABN80430.1	VEB-5	Escherichia coli	EF420108	VEB beta-lactamase	monobactam;cephalosporin	inactivation
ARO:3002374	ACA34904.1	VEB-6	Proteus mirabilis	EU259884.2	VEB beta-lactamase	monobactam;cephalosporin	inactivation
ARO:3002376	ACO56763.1	VEB-7	Acinetobacter baumannii	FJ825622	VEB beta-lactamase	monobactam;cephalosporin	inactivation
ARO:3002377	AGH33739.1	VEB-8	Escherichia coli	JX679208	VEB beta-lactamase	monobactam;cephalosporin	inactivation
ARO:3002378	AAK14293.1	VEB-9	Pseudomonas aeruginosa	AF324833.1	VEB beta-lactamase	monobactam;cephalosporin	inactivation
ARO:3004715	AHB37625.1	vga(E) Staphylococcus cohnii	Staphylococcus cohnii	KF540226.1	ABC-F ATP-binding cassette ribosomal protection protein	macrolide ;lincosamide ;streptogramin ;tetracycline ;oxazolidinone ;phenicol ;pleuromutilin	target protection
ARO:3002829	AAA26684.1	vgaA	Staphylococcus aureus	M90056.1	ABC-F ATP-binding cassette ribosomal protection protein	macrolide ;lincosamide ;streptogramin ;tetracycline ;oxazolidinone ;phenicol ;pleuromutilin	target protection
ARO:3002830	ABH10964.1	vgaALC	Staphylococcus haemolyticus	DQ823382	ABC-F ATP-binding cassette ribosomal protection protein	macrolide ;lincosamide ;streptogramin ;tetracycline ;oxazolidinone ;phenicol ;pleuromutilin	target protection
ARO:3000118	AAB95639.1	vgaB	Staphylococcus aureus	U82085	ABC-F ATP-binding cassette ribosomal protection protein	macrolide ;lincosamide ;streptogramin ;tetracycline ;oxazolidinone ;phenicol ;pleuromutilin	target protection
ARO:3002831	CBL58195.1	vgaC	Staphylococcus aureus	FN806792.1	ABC-F ATP-binding cassette ribosomal protection protein	macrolide ;lincosamide ;streptogramin ;tetracycline ;oxazolidinone ;phenicol ;pleuromutilin	target protection
ARO:3002832	ACX92986.2	vgaD	Enterococcus faecium	GQ205627	ABC-F ATP-binding cassette ribosomal protection protein	macrolide ;lincosamide ;streptogramin ;tetracycline ;oxazolidinone ;phenicol ;pleuromutilin	target protection
ARO:3002833	CBY88983.1	vgaE	Staphylococcus aureus subsp. aureus ST398	FR772051	ABC-F ATP-binding cassette ribosomal protection protein	macrolide ;lincosamide ;streptogramin ;tetracycline ;oxazolidinone ;phenicol ;pleuromutilin	target protection
ARO:3001307	AAA98349.1	VgbA	Staphylococcus aureus	M20129	streptogramin vgb lyase	streptogramin	inactivation
ARO:3001308	AAC61670.1	VgbB	Staphylococcus cohnii	AF015628	streptogramin vgb lyase	streptogramin	inactivation
ARO:3003990	APB03225.1	VgbC	Paenibacillus sp. LC231	KX531055.1	streptogramin vgb lyase	streptogramin	inactivation
ARO:3004117	AID70696	Vibrio cholerae OmpU	Vibrio cholerae	KJ699300	General Bacterial Porin with reduced permeability to peptide s	peptide	reduced permeability to
ARO:3004289	AAF94716.1	Vibrio cholerae varG	Vibrio cholerae O1 biovar El Tor str. N16961	AE003852.1	subclass B1 Vibrio cholerae varG beta-lactamase	carbapenem	inactivation
ARO:3002283	ABC94518.1	VIM-13	Pseudomonas aeruginosa	DQ365886	VIM beta-lactamase	carbapenem;cephalosporin;cephamycin;penam;penem	inactivation
ARO:3002285	ACB54702.1	VIM-15	Pseudomonas aeruginosa	EU419745	VIM beta-lactamase	carbapenem;cephalosporin;cephamycin;penam;penem	inactivation
ARO:3002289	ACY29468.1	VIM-19	Escherichia coli	FJ822963	VIM beta-lactamase	carbapenem;cephalosporin;cephamycin;penam;penem	inactivation
ARO:3002293	ACT33323.1	VIM-23	Enterobacter cloacae	GQ242167	VIM beta-lactamase	carbapenem;cephalosporin;cephamycin;penam;penem	inactivation
ARO:3002294	ADL27533.1	VIM-24	Klebsiella pneumoniae	HM855205	VIM beta-lactamase	carbapenem;cephalosporin;cephamycin;penam;penem	inactivation
ARO:3002273	AAG27703.1	VIM-3	Pseudomonas aeruginosa	AF300454	VIM beta-lactamase	carbapenem;cephalosporin;cephamycin;penam;penem	inactivation
ARO:3002302	AEZ49857.1	VIM-32	Klebsiella oxytoca	JN676230	VIM beta-lactamase	carbapenem;cephalosporin;cephamycin;penam;penem	inactivation
ARO:3002303	AFP99175.1	VIM-33	Klebsiella pneumoniae	JX258134	VIM beta-lactamase	carbapenem;cephalosporin;cephamycin;penam;penem	inactivation
ARO:3003061	CAA26235.1	viomycin phosphotransferase	Streptomyces vinaceus	X02393	viomycin phosphotransferase	peptide	inactivation
ARO:3004476	NP_388442.1	vmlR	Bacillus subtilis subsp. subtilis str. 168	NC_000964.3	ABC-F ATP-binding cassette ribosomal protection protein	macrolide ;lincosamide ;streptogramin ;tetracycline ;oxazolidinone ;phenicol ;pleuromutilin	target protection
ARO:3003558	AAX55643.1	y56 beta-lactamase	Yersinia enterocolitica	AY954728	BlaA beta-lactamase	cephalosporin;penam	inactivation
ARO:3003063	CAB13166.1	ykkC	Bacillus subtilis subsp. subtilis str. 168	AL009126	small multidrug resistance (SMR) efflux pump	macrolide ;aminoglycoside ;tetracycline ;aminocoumarin ;phenicol	efflux
ARO:3003064	CAB13167.1	ykkD	Bacillus subtilis subsp. subtilis str. 168	AL009126	small multidrug resistance (SMR) efflux pump	macrolide ;aminoglycoside ;tetracycline ;aminocoumarin ;phenicol	efflux
ARO:3003952	AAC75271.1	yojI	Escherichia coli str. K-12 substr. MG1655	U00096.3	ATP-binding cassette (ABC) efflux pump	macrolide ;fluoroquinolone ;cephalosporin;penam;tetracycline ;peptide ;acridine dye;rifamycin ;pleuromutilin ;nitroimidazole	efflux
