# Supplementary material for: Metagenomics Insights Into the Microbial Diversity and Microbiome Network Analysis on the Heterogeneity of Influent to Effluent Water
Source: Front Microbiol. 2022 Apr 14;13:779196. doi: 10.3389/fmicb.2022.779196 (PMC9048743; doi:10.3389/fmicb.2022.779196)
Supplement: Supplementary file 4 [file Table_3.XLSX]

## Sheet: Sheet2
Sample	Influent Mean	Effluent Mean	Mean difference %
Other (Species-specific mutated ARG gene)	574.325	362.547	-211.779	0.368744
macB	133.503	55.7245	-77.7785	0.582597
PvrR	67.6037	12.2643	-55.3394	0.818586
evgS	72.141	18.1082	-54.0327	0.748988
adeL	60.2573	13.1375	-47.1198	0.781977
NmcR	30.3974	6.06486	-24.3326	0.800481
cpxA	30.6675	7.76705	-22.9005	0.746734
bcrA	38.356	19.9113	-18.4447	0.480882
tetA(48)	45.7438	28.7292	-17.0146	0.371954
msbA	26.9275	14.395	-12.5326	0.465418
MexT	15.0512	2.60184	-12.4493	0.827134
vanRF	15.097	3.76484	-11.3322	0.750624
bcr-1	13.4089	3.05	-10.3589	0.772539
basR	16.5786	6.67387	-9.90476	0.597441
cmlv	11.5779	1.8846	-9.69327	0.837224
MexS	16.075	6.40886	-9.66612	0.601315
baeR	12.9516	4.1866	-8.76496	0.676749
baeS	13.3134	4.77524	-8.53817	0.641321
evgA	9.7643	1.95476	-7.80954	0.799805
golS	9.54637	1.75352	-7.79285	0.816315
smeS	11.3253	3.98733	-7.33793	0.647926
basS	14.4181	7.26231	-7.15582	0.496307
vanRI	10.69	4.39538	-6.29463	0.588833
mexK	8.65019	2.54454	-6.10565	0.70584
optrA	13.0107	7.20036	-5.81038	0.446583
adeR	7.81778	2.07174	-5.74603	0.734996
OprN	7.10256	1.46899	-5.63357	0.793175
mdtN	6.58042	1.22957	-5.35085	0.813147
OprM	8.51736	3.20955	-5.30781	0.623176
OpmH	7.17596	2.00926	-5.1667	0.720002
arlS	9.13582	4.1337	-5.00212	0.547528
ramA	6.22478	1.31856	-4.90623	0.788176
novA	17.1047	12.4483	-4.65637	0.272227
farB	6.34821	1.73432	-4.6139	0.726802
rosB	12.0785	7.59909	-4.47938	0.370857
vanHB	7.15422	2.68483	-4.46939	0.624721
PmpM	6.40896	2.29003	-4.11892	0.642682
rosA	4.80532	1.00113	-3.80419	0.791661
MvaT	4.48676	0.690446	-3.79632	0.846115
mexW	6.15151	2.36337	-3.78814	0.615807
MexB	4.64563	0.93186	-3.71377	0.799411
mexV	8.24235	4.54907	-3.69327	0.448085
vanRM	6.34894	2.71655	-3.63239	0.572126
oleC	16.5935	13.0323	-3.56114	0.214611
TriC	4.5305	0.99831	-3.53219	0.779647
TaeA	14.2672	10.8375	-3.42977	0.240395
vanRN	4.49456	1.08272	-3.41183	0.759103
iri	6.49898	3.09456	-3.40442	0.52384
MexA	4.74485	1.35199	-3.39286	0.715062
mexJ	4.6645	1.28482	-3.37967	0.724552
vanRE	5.07729	1.70798	-3.36931	0.663603
emrA	4.30939	1.01277	-3.29662	0.764985
mdtC	7.03847	3.76274	-3.27573	0.465404
mexL	4.72853	1.54509	-3.18343	0.67324
arnA	20.5776	17.3944	-3.18319	0.154692
mepA	3.67784	0.528973	-3.14887	0.856173
adeB	4.89579	1.76131	-3.13448	0.640241
sdiA	3.7899	0.664653	-3.12525	0.824625
OpmB	7.13446	4.0284	-3.10606	0.43536
MexF	4.26776	1.18809	-3.07967	0.721612
adeS	3.95994	0.88464	-3.0753	0.776602
mexH	4.16741	1.10626	-3.06116	0.734546
tcr3	5.46474	2.4134	-3.05135	0.55837
CRP	4.65829	1.65255	-3.00574	0.645245
TriA	3.67593	0.79685	-2.87908	0.783225
mdtP	5.02899	2.20812	-2.82088	0.560923
vanTG	7.25051	4.45518	-2.79533	0.385536
macA	3.6358	0.858363	-2.77744	0.763914
vanRB	4.38613	1.66455	-2.72158	0.620496
vanHO	3.76998	1.10417	-2.66581	0.707115
mexN	6.53075	3.98663	-2.54412	0.389561
kdpE	6.58609	4.04317	-2.54292	0.386105
vanHD	5.87938	3.37198	-2.5074	0.426473
MuxB	6.2599	3.7666	-2.4933	0.398297
vanHF	3.64215	1.19163	-2.45053	0.672824
lmrC	3.73613	1.29943	-2.4367	0.6522
emrB	3.91191	1.53065	-2.38126	0.608721
gadW	2.84983	0.489228	-2.36061	0.828331
LpxC	5.35247	2.99617	-2.35631	0.440228
tetB(48)	4.8894	2.59808	-2.29132	0.46863
tetA(60)	3.5278	1.26959	-2.2582	0.640117
marA	2.69514	0.490837	-2.2043	0.81788
mtrR	4.14646	1.95136	-2.1951	0.529392
TriB	2.83294	0.676403	-2.15654	0.761237
tetB(60)	4.77336	2.64554	-2.12783	0.445771
tet(35)	2.24851	0.140499	-2.10802	0.937515
MexE	2.5327	0.502965	-2.02974	0.801412
nalD	2.76502	0.751559	-2.01346	0.72819
cfrC	3.67124	1.66111	-2.01013	0.547534
MuxC	3.03121	1.02312	-2.00808	0.66247
vanSC	2.64238	0.649759	-1.99262	0.754101
MuxA	4.16393	2.27834	-1.88559	0.452838
gadX	2.19673	0.325544	-1.87119	0.851805
salA	2.68834	0.900468	-1.78787	0.665047
mexM	2.25805	0.499899	-1.75815	0.778615
acrD	2.6034	0.871477	-1.73192	0.665254
vanRG	2.96725	1.26501	-1.70224	0.573677
tetR	2.07385	0.383308	-1.69054	0.815171
vanHA	3.99149	2.30672	-1.68478	0.422092
cdeA	1.80472	0.134516	-1.6702	0.925464
emrK	2.128	0.457849	-1.67016	0.784846
mdtA	2.35156	0.710247	-1.64132	0.697968
hp1181	3.66688	2.06838	-1.59851	0.435931
nalC	2.23287	0.665435	-1.56743	0.701982
vanSN	2.15726	0.592988	-1.56427	0.72512
adeG	2.3873	0.83204	-1.55526	0.651473
vanSA	2.08839	0.578808	-1.50958	0.722845
SAT-3	1.95865	0.45421	-1.50444	0.7681
mgrA	1.76659	0.265806	-1.50079	0.849538
DHA-1	2.38793	0.927613	-1.46032	0.611541
efmA	2.05862	0.603406	-1.45521	0.706888
yojI	2.11309	0.66879	-1.4443	0.683501
ugd	7.34503	6.00119	-1.34384	0.182959
MCR-3.11	1.63443	0.294083	-1.34035	0.82007
acrB	1.55915	0.234692	-1.32445	0.849474
adeH	1.71673	0.396006	-1.32073	0.769325
chrB	1.58359	0.322815	-1.26077	0.796149
acrE	1.54472	0.284412	-1.26031	0.815881
cmx	3.03591	1.80237	-1.23355	0.406318
vanRC	1.79189	0.561701	-1.23019	0.686531
vanHM	2.42984	1.2303	-1.19954	0.49367
tet(56)	1.50743	0.324832	-1.1826	0.784513
SRT-2	1.59609	0.417416	-1.17867	0.738476
fexA	1.67365	0.523083	-1.15057	0.68746
emrY	1.74355	0.600034	-1.14351	0.655855
opmD	1.30812	0.223831	-1.08429	0.828892
tetB(46)	2.32728	1.28547	-1.04181	0.447653
AxyY	2.46592	1.42446	-1.04146	0.422342
OprZ	1.52193	0.491648	-1.03028	0.676956
MexC	1.40128	0.391069	-1.01021	0.72092
tet(43)	1.52376	0.529393	-0.99437	0.652575
MIR-9	1.34442	0.353142	-0.991275	0.737327
eptA	1.20011	0.219959	-0.980153	0.816718
dfrA3	2.83999	1.87735	-0.962635	0.338958
vanE	1.60458	0.643202	-0.961381	0.599147
mdtG	1.20355	0.273478	-0.930076	0.772775
vanRA	1.35433	0.452446	-0.901883	0.665926
LpxA	7.08918	6.19549	-0.893697	0.126065
tolC	1.28173	0.405877	-0.875855	0.683337
Erm(47)	1.0953	0.225159	-0.870145	0.794432
vgaD	1.12562	0.264806	-0.860816	0.764747
mdtB	1.84208	0.986158	-0.855924	0.46465
Tet(X3)	1.37032	0.521523	-0.8488	0.619416
oprA	1.09456	0.253169	-0.841394	0.768703
MCR-8	0.938582	0.098539	-0.840043	0.895013
LRA-8	1.57966	0.741053	-0.838611	0.53088
farA	2.63576	1.81071	-0.825056	0.313023
abeM	1.0894	0.318568	-0.770828	0.707574
sta	3.09167	2.32199	-0.769675	0.248952
tet(41)	2.64227	1.88609	-0.756175	0.286184
LpeB	1.03206	0.282284	-0.749777	0.726485
vanRL	0.944991	0.195367	-0.749624	0.793261
vanXA	0.894273	0.167854	-0.726419	0.812301
cmeB	4.20303	3.47731	-0.725713	0.172665
RlmA(II)	1.09034	0.391416	-0.698921	0.641014
smeR	3.04618	2.35122	-0.694958	0.228141
patA	1.85817	1.17272	-0.68545	0.368885
tetB(P)	3.59664	2.91183	-0.684814	0.190404
vanSE	0.928737	0.244063	-0.684673	0.737209
ykkD	1.38682	0.708156	-0.678668	0.489368
pgpB	0.852826	0.182917	-0.66991	0.785517
mdtK	0.771537	0.104156	-0.66738	0.865001
mtrD	1.77574	1.11523	-0.660513	0.371965
ErmE	1.06596	0.408828	-0.657136	0.616471
hmrM	1.64195	0.998288	-0.643665	0.392012
vmlR	1.17899	0.558248	-0.62074	0.526503
abeS	1.00937	0.394991	-0.614377	0.608675
tet37	0.647604	0.0462796	-0.601324	0.928537
patB	3.31909	2.72491	-0.594186	0.179021
AER-1	0.766184	0.178621	-0.587563	0.766869
adeA	0.727662	0.166856	-0.560806	0.770695
ANT(3'')-IIa	0.641946	0.0815309	-0.560415	0.872994
tet(A)	0.649809	0.102681	-0.547128	0.841983
SAT-1	0.694616	0.166671	-0.527945	0.760053
smeE	0.707851	0.179973	-0.527878	0.745747
adeF	0.773485	0.250916	-0.522569	0.675604
lmrB	1.0939	0.575882	-0.518018	0.473552
smeD	0.684712	0.175312	-0.509401	0.743963
catB8	0.731542	0.23472	-0.496821	0.679143
sul1	0.680934	0.184461	-0.496473	0.729106
vanSO	0.726018	0.229667	-0.496351	0.683662
ACC-1	0.704789	0.209679	-0.495111	0.702494
facT	1.93359	1.46215	-0.471441	0.243816
ceoB	0.827333	0.357589	-0.469744	0.567781
LRA-13	0.537487	0.0725118	-0.464975	0.865091
efrA	2.91412	2.45261	-0.461514	0.158372
CMY-45	0.554529	0.0978732	-0.456656	0.823502
adeJ	0.992516	0.549362	-0.443154	0.446496
mtrE	0.493355	0.0506128	-0.442742	0.897411
PNGM-1	1.03419	0.591538	-0.442657	0.428021
MexD	0.618333	0.181637	-0.436697	0.706248
cmeA	0.766574	0.341695	-0.42488	0.554258
almG	0.569897	0.165091	-0.404807	0.710315
MCR-3.4	0.455625	0.0532292	-0.402396	0.883173
adeN	1.84631	1.44523	-0.401081	0.217234
mexZ	0.482727	0.0845487	-0.398178	0.824852
tet(42)	0.631459	0.2369	-0.39456	0.624838
acrF	0.59537	0.200817	-0.394553	0.662702
vanTC	0.744406	0.352639	-0.391767	0.526282
APH(6)-Ic	0.616507	0.228961	-0.387546	0.628615
mdsB	0.840472	0.457336	-0.383136	0.455858
SRT-1	0.488113	0.109528	-0.378584	0.775609
vanSG	0.440537	0.0624917	-0.378046	0.858147
mtrA	8.06572	7.69419	-0.371525	0.0460623
pmrA	1.13131	0.769635	-0.361678	0.319698
vanSM	0.554047	0.194766	-0.359281	0.648467
catIII	0.392135	0.0332854	-0.358849	0.915117
vatC	0.466353	0.11376	-0.352594	0.756065
mexP	0.413947	0.0691926	-0.344754	0.832847
adeK	0.403279	0.0596154	-0.343663	0.852173
smeC	0.475196	0.140379	-0.334817	0.704587
mdtE	0.511063	0.179116	-0.331947	0.649522
AIM-1	0.610729	0.27972	-0.331009	0.54199
tet(52)	0.487982	0.16047	-0.327512	0.671156
SAT-4	0.491513	0.176613	-0.3149	0.640675
tet(C)	0.438028	0.130523	-0.307505	0.702022
smeA	0.376458	0.0764719	-0.299986	0.796865
OprJ	0.505512	0.20983	-0.295682	0.584916
mexQ	0.390338	0.0978498	-0.292489	0.749321
MCR-5	0.359404	0.0755075	-0.283897	0.789909
tet(B)	0.448868	0.16591	-0.282958	0.630382
ACC-4	0.316491	0.0358767	-0.280614	0.886642
Erm(30)	0.481913	0.204101	-0.277812	0.576478
dfrA26	1.18788	0.913301	-0.274581	0.231152
emeA	0.600795	0.327784	-0.273011	0.454416
tet(W/N/W)	0.789896	0.517378	-0.272518	0.345005
mdtO	0.31408	0.0479482	-0.266132	0.847338
GES-1	0.299321	0.0333282	-0.265993	0.888654
vgaALC	0.373535	0.118482	-0.255053	0.682809
qacH	0.744377	0.491162	-0.253215	0.340171
ACT-36	0.280442	0.0283623	-0.252079	0.898865
cmeC	0.302599	0.0526974	-0.249901	0.825851
ErmC	0.2983	0.0522251	-0.246075	0.824924
adeC	0.383472	0.140727	-0.242745	0.633018
MCR-3.8	0.262552	0.0232243	-0.239328	0.911544
blaR1	0.303863	0.0682374	-0.235625	0.775433
opmE	0.290438	0.0565771	-0.233861	0.805201
msrE	0.272564	0.0437932	-0.228771	0.839329
vanL	0.433452	0.212408	-0.221044	0.509962
pexA	0.28853	0.0679247	-0.220606	0.764584
CMY-23	0.261888	0.0423264	-0.219561	0.83838
mdsC	0.362857	0.144126	-0.218731	0.602801
dfrI	0.414273	0.195747	-0.218526	0.527493
cmlA5	0.233725	0.0153071	-0.218418	0.934508
MCR-5.2	0.303521	0.0871587	-0.216362	0.712841
QnrVC4	0.323304	0.109442	-0.213862	0.66149
MCR-4.3	0.226554	0.0129472	-0.213607	0.942852
MCR-7.1	0.218975	0.00589728	-0.213078	0.973069
mefC	0.640533	0.428746	-0.211786	0.330641
OXA-42	0.227671	0.0171454	-0.210525	0.924692
ACT-19	0.254489	0.0445933	-0.209896	0.824773
mexY	0.414818	0.206892	-0.207926	0.501246
oleB	1.65985	1.45344	-0.206418	0.124359
ErmF	0.242173	0.0361996	-0.205974	0.850522
catB9	0.234856	0.0334252	-0.20143	0.857678
catV	0.221152	0.0204522	-0.2007	0.90752
dfrA15	0.202055	0.00275598	-0.199299	0.98636
tetM	0.688802	0.492789	-0.196013	0.284571
lin	0.248507	0.0532011	-0.195306	0.785917
OCH-6	0.206253	0.0116433	-0.19461	0.943549
AAC(6')-Ib7	0.209743	0.0170196	-0.192723	0.918855
cipA	0.585377	0.39362	-0.191756	0.327578
tet(L)	0.243707	0.0522975	-0.191409	0.785408
cmrA	0.81637	0.626427	-0.189944	0.232669
Tet(X4)	0.250455	0.065016	-0.185439	0.740409
tet(51)	0.582223	0.398569	-0.183655	0.315437
OXA-10	0.204762	0.0211229	-0.183639	0.896842
qacA	1.67574	1.49229	-0.183457	0.109478
LRA-1	0.252731	0.0692937	-0.183437	0.72582
ACC-3	0.258962	0.0800656	-0.178896	0.690821
oqxA	0.52761	0.353594	-0.174016	0.329819
clbB	1.28812	1.11518	-0.172939	0.134257
eatAv	0.190842	0.0179254	-0.172917	0.906072
QnrS2	0.300028	0.127184	-0.172844	0.576094
efpA	1.26134	1.09287	-0.168469	0.133564
lsaC	0.454202	0.286775	-0.167427	0.368618
Erm(39)	0.183056	0.0177459	-0.16531	0.903058
otrC	0.407656	0.24351	-0.164146	0.402659
lmrA	0.253864	0.089993	-0.163871	0.645508
APH(6)-Id	0.182494	0.0256837	-0.15681	0.859263
dfrA14	0.165187	0.00856097	-0.156626	0.948174
mphG	0.189865	0.0354812	-0.154383	0.813124
CMY-29	0.194723	0.0415592	-0.153163	0.786572
APH(3'')-Ib	0.17222	0.019067	-0.153153	0.889287
mdtM	0.172681	0.0212709	-0.15141	0.876819
efrB	0.787487	0.636209	-0.151278	0.192102
vanSB	0.232729	0.0824363	-0.150293	0.645784
DHA-6	0.195527	0.0453396	-0.150187	0.768115
emrR	0.244085	0.0943404	-0.149745	0.613494
vanRD	0.389579	0.24195	-0.147629	0.378945
AAC(6')-Ib8	0.152171	0.0047776	-0.147393	0.968604
PDC-7	0.184881	0.0378028	-0.147078	0.795528
tet(31)	0.201849	0.0553585	-0.146491	0.725743
smeF	0.191078	0.0448188	-0.146259	0.765442
H-NS	0.565066	0.422854	-0.142212	0.251673
MCR-4.5	0.156781	0.0147963	-0.141985	0.905625
LpeA	0.243919	0.105301	-0.138618	0.568294
cmlA8	0.176857	0.0384972	-0.13836	0.782327
cmlB1	0.178251	0.0405301	-0.137721	0.772624
catB2	0.177942	0.0413935	-0.136548	0.767376
vanXM	0.411472	0.275417	-0.136055	0.330654
vanUG	0.165683	0.0319905	-0.133693	0.806918
tetQ	0.622405	0.490744	-0.131661	0.211536
vatE	0.416867	0.285448	-0.131419	0.315254
APH(3')-Ia	0.147996	0.0182321	-0.129763	0.876806
aadS	0.14661	0.0186001	-0.12801	0.873133
cmlB	0.172588	0.0450463	-0.127542	0.738996
ACT-23	0.157618	0.0302629	-0.127355	0.807998
myrA	0.141062	0.0171182	-0.123944	0.878648
mphE	0.132783	0.00957298	-0.12321	0.927905
AAC(3)-IIb	0.133312	0.01138	-0.121932	0.914636
AAC(6')-Ia	0.197277	0.0757386	-0.121538	0.61608
FosA3	0.143949	0.0239956	-0.119953	0.833305
bacA	5.47253	5.35589	-0.116646	0.0213148
Erm(35)	0.12375	0.0074677	-0.116283	0.939655
blaI	0.155689	0.0418474	-0.113842	0.731212
vatA	0.217243	0.104093	-0.11315	0.520844
emtA	0.181088	0.0694267	-0.111661	0.616612
vanTN	0.145575	0.03458	-0.110995	0.762459
OXA-48	0.110819	0.00135305	-0.109466	0.987791
vanG	0.936926	0.828127	-0.108799	0.116123
oqxB	0.477878	0.369092	-0.108786	0.227644
CMY-74	0.124531	0.016083	-0.108448	0.870851
FosD	0.118445	0.0101326	-0.108313	0.914453
tetX	0.21152	0.103943	-0.107577	0.508591
OXA-209	0.124145	0.0182399	-0.105905	0.853075
mexR	0.319825	0.214517	-0.105308	0.329267
lmrP	0.120317	0.0154162	-0.1049	0.87187
AAC(6')-Ic	0.109594	0.00608156	-0.103512	0.944508
tet(54)	0.148411	0.0476221	-0.100789	0.67912
ACT-30	0.104918	0.00621898	-0.0986995	0.940726
FosC2	0.524682	0.426501	-0.0981811	0.187125
TLA-1	0.117339	0.0196496	-0.0976896	0.83254
CMY-26	0.0997595	0.00274354	-0.097016	0.972499
clbA	0.144541	0.047807	-0.0967338	0.669249
tet(45)	0.123247	0.0268928	-0.0963538	0.781797
catB3	0.21214	0.11604	-0.0960994	0.453
APH(3')-IIc	0.116317	0.0207778	-0.0955389	0.821369
VgbB	0.104072	0.00989926	-0.0941732	0.904881
OXA-12	0.104239	0.0105407	-0.093698	0.898879
mepR	0.131151	0.0409584	-0.0901928	0.687701
ACC-2	0.101114	0.0109341	-0.0901801	0.891864
BUT-1	0.137884	0.0479932	-0.0898909	0.651931
floR	0.124228	0.0347707	-0.0894573	0.720106
vgaE	0.259639	0.171915	-0.0877239	0.33787
mdsA	0.134297	0.0501587	-0.0841379	0.626508
MCR-3.12	0.0942489	0.0124745	-0.0817744	0.867643
CMY-113	0.0843316	0.00401055	-0.080321	0.952443
OCH-7	0.087327	0.00811414	-0.0792129	0.907083
PDC-9	0.0850139	0.00636014	-0.0786538	0.925187
FOX-2	0.0806566	0.00321686	-0.0774397	0.960117
vgaA	0.108284	0.0325691	-0.075715	0.699225
tet(53)	0.0898	0.0157618	-0.0740382	0.824479
catII	0.0783685	0.0052422	-0.0731263	0.933108
lsaB	0.108002	0.0356433	-0.0723587	0.669976
PDC-8	0.0994856	0.0278388	-0.0716467	0.720172
PEDO-3	0.0758752	0.00492073	-0.0709545	0.935147
dfrA24	0.0898129	0.0189131	-0.0708998	0.789417
OXA-50	0.07201	0.0011552	-0.0708548	0.983958
AQU-3	0.0702877	0	-0.0702877	1
ErmD	0.157431	0.0876866	-0.0697448	0.443017
MCR-4.4	0.0779772	0.00875822	-0.069219	0.887682
dfrA19	0.108888	0.0398146	-0.0690737	0.634353
MCR-9	0.0938976	0.0278049	-0.0660927	0.70388
AAC(6')-It	0.07653	0.0104531	-0.0660769	0.863412
tetA(46)	0.273356	0.207315	-0.0660411	0.241594
EreD	0.110451	0.044582	-0.0658692	0.596365
SME-3	0.0861603	0.020321	-0.0658393	0.764149
catB11	0.20915	0.144848	-0.0643019	0.307443
tet(55)	0.113215	0.0491094	-0.0641056	0.566229
MCR-1.9	0.0720616	0.0088281	-0.0632335	0.877492
lnuG	0.0900438	0.0281918	-0.061852	0.68691
lnuF	0.0797946	0.0183428	-0.0614518	0.770124
QnrB74	0.0769903	0.0156847	-0.0613056	0.796277
catA4	0.0902801	0.0292258	-0.0610544	0.676277
mphB	0.0649933	0.00476383	-0.0602295	0.926703
MCR-3.10	0.0624612	0.00482031	-0.0576409	0.922827
LRA-18	0.0680656	0.0122313	-0.0558343	0.820301
APH(3')-IX	0.059902	0.00428804	-0.055614	0.928416
CrpP	0.0633334	0.0077347	-0.0555987	0.877873
tet(Y)	0.0722535	0.0167132	-0.0555403	0.768687
aadA13	0.0590402	0.00365936	-0.0553809	0.938019
tet(49)	0.259074	0.204445	-0.0546293	0.210864
MCR-4.2	0.0554012	0.00103522	-0.054366	0.981314
catB10	0.230716	0.176691	-0.0540252	0.234163
CMY-82	0.0602804	0.00629983	-0.0539805	0.895491
EreA2	0.0909976	0.0377238	-0.0532738	0.585442
CfxA6	0.0536091	0.000792158	-0.0528169	0.985223
ACT-14	0.0604794	0.00783056	-0.0526489	0.870525
vanZF	0.0568643	0.00481293	-0.0520514	0.915361
opcM	0.086509	0.0349621	-0.0515469	0.595856
AAC(6')-32	0.0588326	0.00750913	-0.0513235	0.872364
mdtF	0.140346	0.0895284	-0.0508174	0.362087
tet(E)	0.0608931	0.0100798	-0.0508133	0.834467
carA	1.06807	1.01769	-0.0503723	0.0471622
vatF	0.81579	0.765574	-0.0502157	0.0615547
MCR-3.6	0.0584497	0.0089908	-0.0494589	0.846179
ICR-Mo	0.0698727	0.0204613	-0.0494114	0.707163
AAC(6')-Iag	0.060282	0.0112976	-0.0489845	0.812588
ICR-Mc	0.0707711	0.021996	-0.0487751	0.689195
OXA-181	0.0481928	0	-0.0481928	1
tet(H)	0.225654	0.178247	-0.0474078	0.21009
VEB-9	0.0574867	0.0105422	-0.0469445	0.816615
acrS	0.230628	0.186202	-0.0444265	0.192632
FosA6	0.0672872	0.0229096	-0.0443776	0.659525
LRA-17	0.202142	0.15786	-0.044282	0.219063
vanXYN	0.057954	0.0139208	-0.0440332	0.759796
dfrA23	0.0645804	0.0212615	-0.0433189	0.670774
MCR-2.2	0.0525393	0.0105302	-0.0420091	0.799574
Erm(48)	0.0931492	0.0513437	-0.0418054	0.448801
FOX-7	0.0972579	0.0556078	-0.0416501	0.428244
tet(G)	0.0727288	0.0338207	-0.038908	0.534974
aadA5	0.0466684	0.00865644	-0.038012	0.814512
CPS-1	0.0477934	0.0101265	-0.0376669	0.788119
vanTmL	0.0377076	0.000527174	-0.0371804	0.986019
OXA-129	0.045545	0.00855471	-0.0369902	0.81217
ANT(2'')-Ia	0.0447613	0.00807043	-0.0366909	0.819701
AAC(6')-Ik	0.0683868	0.0317542	-0.0366326	0.535668
CAM-1	0.0350525	0	-0.0350525	1
MCR-1.10	0.0358705	0.0010296	-0.0348409	0.971297
catQ	0.0426419	0.00844569	-0.0341962	0.801939
cmlA6	0.0444079	0.0102314	-0.0341765	0.769604
lnuA	0.0358263	0.00249714	-0.0333291	0.930299
CatU	0.0338029	0.000598614	-0.0332043	0.982291
ACT-28	0.0348109	0.00177404	-0.0330369	0.949038
VEB-8	0.0373808	0.0043871	-0.0329937	0.882638
ACC-5	0.0436895	0.0119164	-0.0317731	0.727248
cml	0.0364463	0.00514023	-0.031306	0.858964
ACT-9	0.0735727	0.0424469	-0.0311258	0.423062
APH(3')-VIII	0.0306228	0	-0.0306228	1
OXA-204	0.0341112	0.00363414	-0.0304771	0.893462
amrA	0.0391611	0.00890988	-0.0302512	0.772481
pp-flo	0.0329359	0.00322401	-0.0297119	0.902113
MCR-3	0.0307788	0.00167107	-0.0291077	0.945707
CfxA2	0.0311035	0.00232211	-0.0287814	0.925342
PDC-10	0.0425072	0.0141506	-0.0283566	0.667101
AAC(6')-Ian	0.0328239	0.00481223	-0.0280117	0.853393
ceoA	0.0323301	0.0051517	-0.0271784	0.840653
OXA-2	0.0385468	0.0118628	-0.026684	0.69225
OXA-15	0.0368825	0.0106232	-0.0262593	0.711971
AAC(3)-VIa	0.0259704	0	-0.0259704	1
OXA-347	0.0376835	0.0117396	-0.0259438	0.688468
CMY-1	0.0290325	0.00320661	-0.0258259	0.889551
DHA-2	0.0489996	0.0232744	-0.0257252	0.525009
mecR1	0.197978	0.172293	-0.025685	0.129737
CMY-100	0.0255582	0	-0.0255582	1
QnrB29	0.0335518	0.00808293	-0.0254689	0.759091
qnrE2	0.0278794	0.00248525	-0.0253941	0.910857
ADC-74	0.0252306	0	-0.0252306	1
OXA-47	0.026299	0.0013874	-0.0249116	0.947245
vanXO	0.0326836	0.00787216	-0.0248114	0.75914
SFH-1	0.0682618	0.0440843	-0.0241775	0.354187
QnrD1	0.0405823	0.0168229	-0.0237594	0.585462
vanF	0.124098	0.100693	-0.0234055	0.188604
ADC-8	0.0231995	0	-0.0231995	1
FOX-10	0.0325896	0.00980773	-0.0227819	0.699053
OXA-59	0.0320563	0.00931415	-0.0227422	0.709444
ACT-17	0.0240369	0.00132687	-0.0227101	0.944799
ACT-24	0.0225649	0	-0.0225649	1
CMY-46	0.0224629	0	-0.0224629	1
MSI-1	1.26763	1.24523	-0.022402	0.0176724
AAC(6')-Iz	0.0437065	0.0216582	-0.0220483	0.504463
vanZA	0.0295899	0.0078453	-0.0217446	0.734866
AAC(6')-Iw	0.0729066	0.0512508	-0.0216558	0.297034
dfrA6	0.0215247	0	-0.0215247	1
ADC-44	0.0214828	0	-0.0214828	1
CMY-80	0.0223793	0.00110271	-0.0212766	0.950726
PDC-87	0.0246413	0.00368953	-0.0209518	0.850271
OXA-55	0.0233604	0.00240942	-0.020951	0.896859
aacA43	0.0358935	0.0149665	-0.020927	0.583029
vanVB	0.0211905	0.000522888	-0.0206676	0.975324
cmlA1	0.0212161	0.000849774	-0.0203663	0.959947
CMY-8	0.0264933	0.00624618	-0.0202471	0.764236
QnrB46	0.0385415	0.0186769	-0.0198646	0.515408
MOX-7	0.0211644	0.00145044	-0.0197139	0.931468
QnrVC3	0.12668	0.107136	-0.019544	0.154279
APH(3')-IIIa	0.0218295	0.0022945	-0.019535	0.89489
aadA6	0.0254913	0.0066456	-0.0188457	0.7393
OXA-3	0.0228172	0.0045938	-0.0182234	0.79867
Erm(41)	0.0190028	0.00118379	-0.017819	0.937704
CARB-1	0.0175985	0.000402958	-0.0171956	0.977103
AAC(6')-Ip	0.0351211	0.0183376	-0.0167835	0.477876
APH(3')-VIa	0.0169746	0.000841153	-0.0161334	0.950446
ACT-5	0.0361225	0.020115	-0.0160075	0.443144
CMY-83	0.0193335	0.00337319	-0.0159603	0.825526
AAC(3)-Ia	0.0285562	0.0126372	-0.015919	0.557461
OCH-8	0.0251977	0.00929238	-0.0159054	0.631222
dfrA18	0.0173382	0.00149314	-0.0158451	0.913882
LRA-10	0.0161549	0.00062521	-0.0155297	0.961299
MCR-3.9	0.0161316	0.000652772	-0.0154788	0.959535
tlrC	0.872135	0.856666	-0.015469	0.0177369
OXA-20	0.0226442	0.00723403	-0.0154102	0.680535
ACT-20	0.020441	0.00568633	-0.0147547	0.721817
OXA-53	0.0197837	0.00503152	-0.0147522	0.745673
ACT-18	0.014391	0	-0.014391	1
ANT(6)-Ib	0.0159037	0.00164988	-0.0142538	0.896258
QnrS3	0.0142108	0.000485242	-0.0137256	0.965854
TEM-1	0.0167594	0.00316175	-0.0135976	0.811344
MIR-5	0.0134561	0	-0.0134561	1
TEM-96	0.0131379	0	-0.0131379	1
MCR-1.7	0.0304155	0.0173871	-0.0130284	0.428346
MCR-3.7	0.0133061	0.000401978	-0.0129041	0.96979
vanXYC	0.0147628	0.0023998	-0.012363	0.837443
dfrF	0.0256127	0.0134313	-0.0121814	0.475599
dfrB5	0.0121464	0	-0.0121464	1
OXA-162	0.015494	0.00341852	-0.0120755	0.779365
dfrA1	0.013982	0.00211838	-0.0118636	0.848492
QnrB20	0.0112119	0	-0.0112119	1
NPS-1	0.0173388	0.00652488	-0.010814	0.623684
QnrS15	0.0110587	0.000386436	-0.0106723	0.965056
vanJ	0.0269948	0.0163548	-0.01064	0.394149
AAC(6')-Ib-SK	0.0178038	0.0072561	-0.0105477	0.592442
PER-7	0.0103599	0	-0.0103599	1
MCR-3.2	0.0113658	0.00101187	-0.010354	0.910972
LCR-1	0.0184077	0.00815437	-0.0102534	0.557014
arr-2	0.0112949	0.00107289	-0.010222	0.905011
lnuC	0.0165361	0.00636268	-0.0101734	0.615224
ACT-1	0.0204191	0.0104958	-0.00992328	0.485981
OXY-1-1	0.0104673	0.000593073	-0.00987424	0.943341
cfr(B)	0.137622	0.127975	-0.00964696	0.0700977
LEN-22	0.0104243	0.000871454	-0.00955285	0.916402
imiS	0.0120683	0.00258366	-0.00948469	0.785915
msrC	0.0521642	0.0428706	-0.00929354	0.17816
QnrB26	0.00909838	0	-0.00909838	1
DHA-3	0.00989243	0.000845567	-0.00904686	0.914524
linG	0.0123258	0.00360177	-0.00872399	0.707786
fosA	0.0195899	0.0109003	-0.0086896	0.443577
AAC(6')-IIa	0.0194499	0.0109541	-0.00849582	0.436805
MCR-3.5	0.035585	0.0271177	-0.00846733	0.237946
PER-1	0.00845351	0	-0.00845351	1
MCR-1.5	0.0139991	0.00559793	-0.00840121	0.600124
QnrB45	0.00992509	0.00162774	-0.00829735	0.835997
CMY-66	0.00843313	0.000372395	-0.00806074	0.955841
OKP-B-8	0.00835657	0.000297571	-0.008059	0.964391
ACT-38	0.00802574	0	-0.00802574	1
ACT-16	0.0105554	0.00278026	-0.00777518	0.736604
OXA-21	0.0130633	0.00570482	-0.00735845	0.563293
CMY-93	0.00731319	0.000134279	-0.00717892	0.981639
CMY-68	0.0117384	0.00475576	-0.00698267	0.594856
OCH-5	0.00877722	0.00191915	-0.00685807	0.781349
cphA7	0.014237	0.00754016	-0.00669688	0.470384
ADC-18	0.00668779	0	-0.00668779	1
OCH-2	0.00876029	0.00214579	-0.0066145	0.755055
MOX-5	0.00968579	0.00318554	-0.00650025	0.671112
ACT-7	0.00823464	0.00203425	-0.00620039	0.752965
cpaA	0.00619331	0	-0.00619331	1
PER-2	0.00613549	0	-0.00613549	1
AQU-2	0.00609048	0	-0.00609048	1
PDC-74	0.0060187	0	-0.0060187	1
CMY-60	0.00600411	0	-0.00600411	1
CMY-28	0.00613684	0.000296536	-0.0058403	0.951679
MIR-1	0.00578675	0	-0.00578675	1
ADC-23	0.00578408	0	-0.00578408	1
ErmT	0.0329062	0.0271851	-0.00572118	0.173863
CMY-81	0.00569312	0	-0.00569312	1
MIR-10	0.00548778	0	-0.00548778	1
vanXYL	0.00877924	0.00332218	-0.00545706	0.621587
APH(3')-Ib	0.00624303	0.000787869	-0.00545516	0.8738
aadA7	0.00544601	0	-0.00544601	1
VIM-23	0.0063389	0.00101234	-0.00532656	0.840297
CarO	0.00522291	0	-0.00522291	1
APH(3')-IIa	0.00901036	0.00380236	-0.005208	0.578001
CTX-M-37	0.00568709	0.000593338	-0.00509375	0.895669
PDC-73	0.00503882	0	-0.00503882	1
VIM-13	0.00681921	0.00178494	-0.00503427	0.738249
AxyX	0.0459306	0.0411764	-0.00475424	0.103509
FOX-5	0.00493989	0.000190546	-0.00474934	0.961427
CARB-9	0.00474561	0	-0.00474561	1
vanSD	0.00515244	0.000410586	-0.00474185	0.920312
PDC-92	0.00473443	0	-0.00473443	1
dfrA30	0.00468594	0	-0.00468594	1
aadA16	0.00503444	0.000572514	-0.00446193	0.886281
CARB-7	0.00505661	0.000697163	-0.00435945	0.862128
OXA-22	0.00430669	0	-0.00430669	1
AAC(6')-Ix	0.00427137	0	-0.00427137	1
MIR-12	0.00494315	0.000817683	-0.00412547	0.834583
QnrB32	0.00459393	0.000469243	-0.00412468	0.897856
QnrS1	0.00539457	0.00135697	-0.0040376	0.748456
VIM-3	0.00499606	0.000968906	-0.00402715	0.806066
OXA-370	0.00397361	0	-0.00397361	1
OXA-37	0.00650255	0.00253361	-0.00396893	0.610366
ADC-3	0.00396845	0	-0.00396845	1
QnrB60	0.00396457	0	-0.00396457	1
OXA-9	0.00390495	0	-0.00390495	1
QnrB5	0.00413379	0.00023433	-0.00389946	0.943314
MCR-4	0.00387994	0	-0.00387994	1
ACI-1	0.00408494	0.000213666	-0.00387128	0.947694
VIM-32	0.00366433	0	-0.00366433	1
OXA-114a	0.0035662	0	-0.0035662	1
MCR-1.12	0.00352034	0	-0.00352034	1
ACT-33	0.00348013	0	-0.00348013	1
VIM-24	0.00359834	0.000149831	-0.00344851	0.958361
MCR-1.2	0.00342762	0	-0.00342762	1
aadA17	0.0034126	0	-0.0034126	1
OXA-286	0.00331212	0	-0.00331212	1
OXA-46	0.00331029	0	-0.00331029	1
AAC(6')-Ih	0.00478823	0.00148957	-0.00329865	0.688909
dfrB2	0.00378532	0.000540523	-0.0032448	0.857206
tet(30)	0.0342347	0.0310107	-0.00322399	0.0941732
CMY-67	0.00347548	0.000269407	-0.00320607	0.922483
CARB-4	0.00330261	0.000179172	-0.00312344	0.945748
AAC(6')-Ib-cr	0.00299982	0	-0.00299982	1
ADC-1	0.00297502	0	-0.00297502	1
CTX-M-113	0.00296664	0	-0.00296664	1
OCH-1	0.00281584	0	-0.00281584	1
AAC(2')-IIa	0.00274402	0	-0.00274402	1
DHA-15	0.00401193	0.00137746	-0.00263448	0.65666
cphA6	0.00737186	0.0047559	-0.00261596	0.354858
OKP-B-12	0.00248239	0	-0.00248239	1
MOX-1	0.00286412	0.000399075	-0.00246505	0.860664
PDC-2	0.00227391	0	-0.00227391	1
DHA-10	0.00213371	0	-0.00213371	1
VEB-5	0.0021225	0	-0.0021225	1
ErmG	0.00209021	0	-0.00209021	1
OXA-205	0.00209013	0	-0.00209013	1
PDC-85	0.00205058	0	-0.00205058	1
BEL-2	0.0020159	0	-0.0020159	1
CTX-M-64	0.00197783	0	-0.00197783	1
OXA-19	0.0019142	0	-0.0019142	1
OCH-3	0.0111584	0.0095618	-0.00159663	0.143088
VIM-19	0.00194982	0.000449484	-0.00150034	0.769475
LEN-4	0.00146754	0	-0.00146754	1
PDC-5	0.00137824	0	-0.00137824	1
AAC(3)-IV	0.0055489	0.00417978	-0.00136911	0.246736
RSA-1	0.00602927	0.00479986	-0.00122941	0.203907
GIM-1	0.019346	0.0181812	-0.00116482	0.06021
Erm(43)	0.00484165	0.00377402	-0.00106763	0.22051
dfrE	0.016257	0.0152409	-0.00101616	0.0625056
OXA-57	0.000901356	0	-0.000901356	1
AAC(6')-Ib11	0.00407894	0.00321177	-0.000867167	0.212596
aadA10	0.000837968	0	-0.000837968	1
dfrA12	0.00939235	0.00858853	-0.00080382	0.0855824
BEL-3	0.000782704	0	-0.000782704	1
aadA4	0.000781175	0	-0.000781175	1
MOX-6	0.00162199	0.00100869	-0.000613302	0.378117
AAC(3)-IIIb	0.00573365	0.00514551	-0.000588131	0.102575
CMY-13	0.00279668	0.00224049	-0.000556186	0.198874
SME-5	0.00102214	0.000561858	-0.00046028	0.450311
vanTrL	0.157654	0.157233	-0.000421023	0.00267055
catI	0.00510921	0.00506437	-4.48404e-05	0.00877638
OXA-54	0.0211484	0.0212423	9.39259e-05	-0.00444128
lnuD	0.0069969	0.00724932	0.00025242	-0.036076
QnrS4	0	0.000449498	0.000449498	#DIV/0!
Erm(38)	0.00211757	0.00289975	0.000782188	-0.36938
mexX	0.0359954	0.0369499	0.000954426	-0.0265152
PDC-90	0.000161155	0.00135559	0.00119444	-7.41171
AxyZ	0.37808	0.379325	0.00124549	-0.00329425
AAC(6')-Ie-APH(2'')-Ia	0.0108082	0.0123577	0.00154948	-0.143361
QnrB15	0.0201886	0.0218261	0.00163751	-0.0811106
BEL-1	0	0.00165529	0.00165529	#DIV/0!
vanXB	0.0422083	0.0439605	0.00175222	-0.0415135
OXA-169	0	0.00175527	0.00175527	#DIV/0!
ADC-81	0	0.00182142	0.00182142	#DIV/0!
SLB-1	0.00895222	0.0107797	0.00182743	-0.204132
MCR-2	0.00261579	0.00445003	0.00183424	-0.701218
APH(3')-IVa	0	0.00186598	0.00186598	#DIV/0!
MSI-OXA	0	0.00187992	0.00187992	#DIV/0!
cmeR	0.014746	0.0166954	0.00194939	-0.132198
KPC-7	0	0.00195864	0.00195864	#DIV/0!
AAC(6')-Iai	0	0.0019861	0.0019861	#DIV/0!
CMY-104	0.0034777	0.00556578	0.00208808	-0.600421
qnrE1	0	0.0021688	0.0021688	#DIV/0!
QnrS12	0	0.00219049	0.00219049	#DIV/0!
CMY-98	0.0139198	0.0161615	0.0022417	-0.161044
AAC(6')-Ib	0	0.00234212	0.00234212	#DIV/0!
OXA-5	0	0.00234332	0.00234332	#DIV/0!
PER-4	0	0.00235365	0.00235365	#DIV/0!
LRA-3	0.0426832	0.0451097	0.00242645	-0.056848
AAC(6')-IIc	0.0157383	0.0181734	0.00243505	-0.154721
FosB4	0	0.0025055	0.0025055	#DIV/0!
arr-3	0	0.00258902	0.00258902	#DIV/0!
QnrB14	0	0.00259477	0.00259477	#DIV/0!
smeB	0.0487233	0.0513496	0.00262625	-0.0539012
imiH	0.00839545	0.0110898	0.00269432	-0.320926
MIR-15	0	0.00270229	0.00270229	#DIV/0!
dfrA21	0.00938782	0.0121075	0.00271968	-0.289703
cmlA4	0.0102363	0.0131279	0.00289164	-0.282489
CMY-115	0	0.00290873	0.00290873	#DIV/0!
OXA-49	0	0.00293015	0.00293015	#DIV/0!
DHA-14	0	0.00307835	0.00307835	#DIV/0!
AAC(6')-Ib10	0	0.00307864	0.00307864	#DIV/0!
OXA-247	0.000417098	0.00352432	0.00310722	-7.44961
IMP-51	0	0.00322368	0.00322368	#DIV/0!
CTX-M-151	0	0.00323878	0.00323878	#DIV/0!
mecI	0.0252188	0.0284585	0.00323973	-0.128465
QnrS10	0.00108869	0.00451424	0.00342555	-3.14647
erm(40)	0	0.00358205	0.00358205	#DIV/0!
VEB-4	0	0.00358794	0.00358794	#DIV/0!
MCR-1.3	0	0.00359823	0.00359823	#DIV/0!
OXA-163	0	0.00362446	0.00362446	#DIV/0!
OXA-56	0	0.00380752	0.00380752	#DIV/0!
OXA-246	0	0.00392161	0.00392161	#DIV/0!
CTX-M-123	0	0.00402135	0.00402135	#DIV/0!
IND-5	0	0.00410836	0.00410836	#DIV/0!
OXY-2-4	0	0.00411476	0.00411476	#DIV/0!
BcII	0.0300623	0.0342023	0.00414001	-0.137714
CTX-M-82	0	0.00414232	0.00414232	#DIV/0!
oleD	0	0.00416283	0.00416283	#DIV/0!
CMY-38	0	0.0042055	0.0042055	#DIV/0!
LEN-26	0	0.00422738	0.00422738	#DIV/0!
AAC(6')-Ig	0.000174241	0.00442731	0.00425307	-24.4091
ADC-10	0	0.00426767	0.00426767	#DIV/0!
DHA-19	0.0451508	0.0494513	0.00430043	-0.0952457
FosB3	0	0.00437107	0.00437107	#DIV/0!
OXA-192	0	0.00437848	0.00437848	#DIV/0!
VEB-6	0	0.00443832	0.00443832	#DIV/0!
QnrB31	0.000396404	0.00501232	0.00461591	-11.6445
ACT-35	0	0.00467936	0.00467936	#DIV/0!
AAC(2')-Ic	0	0.00471216	0.00471216	#DIV/0!
mphK	0	0.0047367	0.0047367	#DIV/0!
ermZ	0	0.00490611	0.00490611	#DIV/0!
ACT-8	0	0.00491452	0.00491452	#DIV/0!
IMP-37	0	0.00501136	0.00501136	#DIV/0!
VIM-15	0.000222487	0.00524358	0.00502109	-22.5681
FOX-8	0.000633385	0.00567692	0.00504353	-7.96282
QnrB42	0.00068376	0.00579001	0.00510625	-7.4679
VEB-1b	0.00154195	0.00674159	0.00519964	-3.37211
DHA-21	0	0.00523085	0.00523085	#DIV/0!
CMY-72	0.00033124	0.00556824	0.005237	-15.8103
VIM-33	0	0.00534004	0.00534004	#DIV/0!
OXA-183	0	0.00535819	0.00535819	#DIV/0!
ACT-31	0	0.00558282	0.00558282	#DIV/0!
AAC(6')-Iv	0	0.00564675	0.00564675	#DIV/0!
AAC(6')-31	0.00651533	0.0122249	0.00570959	-0.876332
IMP-31	0	0.00586643	0.00586643	#DIV/0!
QnrS7	0.000542212	0.00648121	0.005939	-10.9533
tet(38)	0.0134354	0.0194007	0.00596537	-0.444005
SHV-16	0	0.00612273	0.00612273	#DIV/0!
MOX-9	0.0189522	0.0251537	0.0062015	-0.327218
CTX-M-122	0	0.00632673	0.00632673	#DIV/0!
AAC(2')-Ib	0	0.00641136	0.00641136	#DIV/0!
PDC-80	9.35535e-05	0.00658813	0.00649457	-69.4209
CMY-85	0	0.00656243	0.00656243	#DIV/0!
IMP-56	0	0.00661094	0.00661094	#DIV/0!
OXA-120	0	0.00670533	0.00670533	#DIV/0!
ACT-25	0	0.00677081	0.00677081	#DIV/0!
DHA-13	0.00398919	0.0109181	0.0069289	-1.73692
aadA27	0	0.00732947	0.00732947	#DIV/0!
SHV-64	0.000401289	0.00779948	0.00739819	-18.4361
MOX-2	0.0119519	0.019487	0.00753508	-0.630449
dfrA22	0.0199566	0.0277243	0.0077677	-0.389229
tmrB	0	0.00784835	0.00784835	#DIV/0!
ESP-1	0.00645095	0.0143385	0.00788751	-1.22269
APH(2'')-IIIa	0.000154143	0.00808429	0.00793015	-51.4467
FosB	0.0225285	0.0304804	0.00795191	-0.35297
aadK	0	0.00799152	0.00799152	#DIV/0!
QnrB4	0.000221578	0.00821972	0.00799815	-36.0964
AAC(6')-Iak	0.0174791	0.0257671	0.00828801	-0.474167
CTX-M-45	0	0.00855587	0.00855587	#DIV/0!
OXA-665	0	0.00873875	0.00873875	#DIV/0!
CMY-114	0.00511104	0.0140496	0.00893859	-1.74888
ErmS	0.000614507	0.00961284	0.00899833	-14.6432
vgaC	0.102534	0.111601	0.00906684	-0.0884279
APH(2'')-IVa	0	0.00914529	0.00914529	#DIV/0!
AAC(6')-Im	0.000307256	0.00954642	0.00923917	-30.07
BLA1	0	0.00925034	0.00925034	#DIV/0!
APH(3')-IIb	0	0.00929128	0.00929128	#DIV/0!
LAT-1	0	0.00944973	0.00944973	#DIV/0!
CTX-M-126	0	0.0095185	0.0095185	#DIV/0!
AAC(6')-Iy	0.0320341	0.0417276	0.00969352	-0.3026
PDC-76	0.000283207	0.0106219	0.0103387	-36.5057
ROB-1	0	0.0104192	0.0104192	#DIV/0!
ACT-12	0	0.0105453	0.0105453	#DIV/0!
bcrB	0	0.0107334	0.0107334	#DIV/0!
FosB6	0	0.0107929	0.0107929	#DIV/0!
dfrA32	0.00142541	0.0127663	0.0113409	-7.95627
dfrB7	0	0.0115428	0.0115428	#DIV/0!
FOX-1	0.00405787	0.0158613	0.0118035	-2.90878
AAC(6')-Iaj	0	0.0123134	0.0123134	#DIV/0!
CFE-1	0.00286182	0.0151761	0.0123143	-4.30296
OXA-60	0.00027685	0.012942	0.0126651	-45.7472
QnrB49	0	0.0128329	0.0128329	#DIV/0!
OXA-296	0	0.0129425	0.0129425	#DIV/0!
CMY-73	0.0320668	0.0450442	0.0129774	-0.404698
QnrS9	0.000731085	0.0137304	0.0129993	-17.7808
AAC(6')-Iad	0.00762651	0.0207402	0.0131137	-1.71949
ErmU	0.000447458	0.0138247	0.0133772	-29.896
CTX-M-87	0.000239746	0.0139689	0.0137292	-57.2655
arr-4	0.0011078	0.0148566	0.0137488	-12.4109
AQU-1	0.00653523	0.0204686	0.0139334	-2.13205
QnrB40	8.77715e-05	0.0141608	0.014073	-160.337
QnrB2	0	0.0145457	0.0145457	#DIV/0!
AAC(3)-Ib	0.014747	0.029508	0.014761	-1.00095
OXA-85	0.00219143	0.0172145	0.0150231	-6.85539
QnrB25	0.000837968	0.016247	0.0154091	-18.3886
MOX-3	0.00444377	0.0200017	0.0155579	-3.50106
tet(D)	0.00449973	0.0203242	0.0158245	-3.51677
mgtA	0	0.0159162	0.0159162	#DIV/0!
AAC(3)-Ic	0	0.0164592	0.0164592	#DIV/0!
VEB-7	0	0.0175143	0.0175143	#DIV/0!
vanO	0.143683	0.161249	0.0175658	-0.122254
OXA-29	0	0.0175919	0.0175919	#DIV/0!
mecC	0.921347	0.939129	0.0177819	-0.0192999
Bla2	0.0173784	0.0354927	0.0181143	-1.04234
LRA-12	0.065794	0.0841727	0.0183786	-0.279336
lsaA	0.0331976	0.051589	0.0183914	-0.553997
QnrB47	0.000229991	0.0186241	0.0183941	-79.9776
tet(48)	0.0225345	0.0413706	0.0188361	-0.835877
ErmB	0.0457349	0.0647676	0.0190327	-0.416153
FosB1	0	0.0192131	0.0192131	#DIV/0!
vanB	0.00309855	0.0224834	0.0193849	-6.2561
Erm(O)-lrm	0.0006208	0.0202834	0.0196626	-31.6731
DHA-12	0.068522	0.0887736	0.0202516	-0.295548
vanA	0.190237	0.210594	0.0203577	-0.107013
DHA-16	0.00710263	0.0280092	0.0209066	-2.9435
AAC(6')-33	0.00170487	0.0227034	0.0209985	-12.3168
QnrB8	0.000768137	0.0219522	0.021184	-27.5785
vanXD	0.0256595	0.0468839	0.0212244	-0.827154
FomA	0	0.0212329	0.0212329	#DIV/0!
AAC(6')-Il	0.0757412	0.0970736	0.0213324	-0.281648
FOX-9	0.00526401	0.0267561	0.0214921	-4.08284
EreB	0.0722468	0.0937743	0.0215275	-0.297971
QepA4	0.0859997	0.10763	0.0216308	-0.251521
QnrB41	0	0.0216796	0.0216796	#DIV/0!
RCP-1	0.000948362	0.0227971	0.0218487	-23.0384
Erm(42)	0.0146821	0.0365877	0.0219055	-1.49198
tet(J)	0.0183437	0.0405764	0.0222327	-1.21201
dfrD	0.0692172	0.091562	0.0223447	-0.32282
ACT-21	0.00022376	0.0228573	0.0226335	-101.151
QnrVC7	0.0434396	0.0662653	0.0228257	-0.525457
APH(2'')-IIa	0	0.0228526	0.0228526	#DIV/0!
AAC(3)-Xa	0.00351109	0.0264665	0.0229555	-6.53799
APH(9)-Ia	0	0.0230036	0.0230036	#DIV/0!
QnrB23	0.000615441	0.0244847	0.0238692	-38.7839
QnrB27	0.000542883	0.0245597	0.0240168	-44.2393
cphA2	0.000281504	0.0246469	0.0243654	-86.5541
dfrA9	0.0124264	0.0368429	0.0244166	-1.9649
dfrB1	0	0.0246707	0.0246707	#DIV/0!
tetA(P)	0.00607633	0.0308989	0.0248226	-4.08513
LRA-7	0.00722588	0.0323027	0.0250769	-3.47042
LRA-2	0.512419	0.538228	0.0258093	-0.0503675
FosX	0.039232	0.0656418	0.0264098	-0.67317
blaF	0.000162485	0.027019	0.0268565	-165.286
LRA-9	0.000413201	0.0277836	0.0273704	-66.2398
erm45	1.41391	1.44178	0.0278664	-0.0197088
IMP-35	0.016852	0.0448596	0.0280076	-1.66197
dfrK	0.00759893	0.0357083	0.0281094	-3.69912
QnrD2	0.00562662	0.0342514	0.0286248	-5.08739
FOX-4	0.0140836	0.0428122	0.0287286	-2.03986
dfrC	0.100262	0.129094	0.0288322	-0.287569
OCH-4	0.00012302	0.0293056	0.0291826	-237.217
sul3	0.00819502	0.0375411	0.029346	-3.58096
ErmV	0	0.0295794	0.0295794	#DIV/0!
CMY-103	0.000463305	0.0301005	0.0296372	-63.969
QnrB48	0.00128023	0.0312406	0.0299604	-23.4024
mphA	0.25921	0.290024	0.0308136	-0.118875
DHA-7	0.000206477	0.0314697	0.0312632	-151.413
TEM-121	0.000302	0.0319665	0.0316645	-104.85
LEN-15	0.000316693	0.0320043	0.0316876	-100.058
cphA4	0.00966931	0.0418257	0.0321564	-3.32562
tet(K)	0.000834199	0.0330093	0.0321751	-38.5701
vanRO	0.0634379	0.0964687	0.0330309	-0.520681
QnrB35	0.0221431	0.0551763	0.0330332	-1.49181
ErmW	0.0107609	0.0438468	0.0330859	-3.07465
vanM	0.0269271	0.0605276	0.0336005	-1.24783
ACT-22	0.00868284	0.042698	0.0340151	-3.91751
gimA	0.0327744	0.0668035	0.0340291	-1.03829
TLA-3	0.0133818	0.0476861	0.0343043	-2.56351
IND-6	0.000627167	0.0349389	0.0343118	-54.7091
ACT-27	0.0218396	0.0576055	0.0357659	-1.63766
LRA-5	0.000461368	0.0370099	0.0365485	-79.2179
tet(33)	0.0935335	0.130382	0.0368486	-0.393961
AAC(6')-IIb	0.000368093	0.0377883	0.0374202	-101.66
vanWB	0.00338899	0.0408395	0.0374505	-11.0506
vatB	1.25825	1.2959	0.0376431	-0.029917
cfrA	0.160444	0.198143	0.0376989	-0.234967
vanWG	0.0639171	0.102181	0.0382635	-0.598642
QnrB16	0.000637694	0.0389233	0.0382856	-60.0376
Erm(49)	0.000557981	0.0389632	0.0384052	-68.8289
MCR-6.1	0.0186945	0.0574238	0.0387293	-2.07169
ErmY	0.00606518	0.0456907	0.0396255	-6.53328
VEB-3	0	0.040905	0.040905	#DIV/0!
QnrB57	0.00341249	0.0448396	0.0414271	-12.1399
FosA4	0.00203986	0.043506	0.0414662	-20.3279
TLA-2	0.000362589	0.0420041	0.0416415	-114.845
LnuP	0	0.0417858	0.0417858	#DIV/0!
APH(6)-Ib	0	0.0420256	0.0420256	#DIV/0!
ErmA	0.0062557	0.0486826	0.0424269	-6.78211
vanXYE	0.000345282	0.043567	0.0432218	-125.178
MIR-4	0.00127739	0.0445048	0.0432274	-33.8403
FosA7	0.00506199	0.0487382	0.0436762	-8.62826
tetS	0.335906	0.380478	0.0445716	-0.132691
FosC	0	0.0447078	0.0447078	#DIV/0!
dfrG	0.0709497	0.115964	0.045014	-0.634449
AAC(6')-Ij	0.0228285	0.0684151	0.0455866	-1.99691
AAC(6')-If	0.0309548	0.0771248	0.0461699	-1.49153
vatD	0.124746	0.171505	0.0467585	-0.374829
QnrVC1	0.0753766	0.122379	0.0470024	-0.623568
QnrS8	0.00226145	0.0506024	0.048341	-21.3761
ACT-37	0	0.0485562	0.0485562	#DIV/0!
QnrS11	0	0.0490183	0.0490183	#DIV/0!
tet(40)	0.0318103	0.0808601	0.0490497	-1.54194
Erm(31)	0.0137071	0.0656284	0.0519213	-3.78792
DHA-5	0.00172251	0.0541272	0.0524047	-30.4234
Erm(33)	0.000389496	0.0531086	0.0527191	-135.352
VgbA	0.00108666	0.0545166	0.0534299	-49.169
QnrVC6	0.0430671	0.0990792	0.056012	-1.30057
QnrB55	0.000585882	0.0583734	0.0577875	-98.6334
VgbC	0.144985	0.203004	0.0580191	-0.400174
CblA-1	0.0299671	0.0887437	0.0587766	-1.96137
CEPH-A3	0.0355139	0.0943925	0.0588786	-1.6579
mphF	0.0718656	0.131362	0.0594966	-0.827888
ErmH	0.00357958	0.0642636	0.060684	-16.9528
APH(6)-Ia	0.00167123	0.0629535	0.0612822	-36.669
tet36	0.367957	0.433144	0.0651868	-0.177159
clcD	0.0565471	0.122729	0.0661822	-1.17039
SME-2	0.00351929	0.0699848	0.0664656	-18.8861
Erm(37)	0.0658616	0.13308	0.0672181	-1.0206
dfrB3	0.00297885	0.0708941	0.0679153	-22.7992
QnrS5	0.00993718	0.0805196	0.0705824	-7.10286
FosA2	0.0104792	0.0816658	0.0711867	-6.79315
PEDO-1	0.322167	0.39385	0.0716827	-0.222502
vanXF	0.0451014	0.117215	0.0721136	-1.59892
sul4	0.00977261	0.0831107	0.0733381	-7.50445
QnrB65	0.0092102	0.0826427	0.0734325	-7.97295
bmr	0.0144205	0.0917313	0.0773108	-5.36117
vanYF	0.00499608	0.0836411	0.078645	-15.7413
AAC(6')-34	0.0144889	0.0946414	0.0801524	-5.53198
bcrC	0.751809	0.833935	0.0821258	-0.109238
dfrB6	0.000937267	0.0831841	0.0822469	-87.7518
vanTE	0.172992	0.25549	0.0824974	-0.476885
SPM-1	0.0107416	0.0940874	0.0833457	-7.75912
tet(50)	0.0805894	0.164963	0.0843736	-1.04696
rgt1438	0.0910705	0.175989	0.0849188	-0.932452
vanC	0.0449803	0.131108	0.0861276	-1.91478
qepA	0.00338484	0.0903954	0.0870106	-25.7059
mphI	0.000140332	0.0876524	0.087512	-623.608
vanXYG	0.0147878	0.107268	0.0924805	-6.25384
arr-1	0.120323	0.218271	0.0979479	-0.814041
oleI	0.00704474	0.105397	0.0983519	-13.961
mdtH	0.550831	0.652583	0.101753	-0.184726
dfrA20	0.0679169	0.169736	0.101819	-1.49917
AAC(6')-Iaa	0	0.102488	0.102488	#DIV/0!
FosA5	0.17182	0.276868	0.105048	-0.611382
APH(4)-Ia	0.0393292	0.145398	0.106069	-2.69695
mphO	0.0175932	0.125652	0.108059	-6.1421
LRA-19	0.0893032	0.20204	0.112737	-1.26241
GOB-18	0.0117313	0.126999	0.115267	-9.82566
vanYA	0.00177588	0.119157	0.117381	-66.0976
dfrB4	0.0011978	0.122586	0.121389	-101.343
tet(59)	0.036304	0.166277	0.129973	-3.58012
QnrA4	0.0974484	0.232164	0.134715	-1.38243
vanSL	1.1659	1.30286	0.136962	-0.117473
ErmQ	0.000230746	0.140542	0.140311	-608.077
EdeQ	0.0769575	0.217847	0.140889	-1.83074
mexG	0.0765493	0.220423	0.143874	-1.87949
Erm(34)	0.173632	0.317711	0.144079	-0.829794
ErmX	0.0671652	0.217159	0.149993	-2.2332
QnrS6	0.0185949	0.170256	0.151661	-8.15607
vanYG1	0.003086	0.156727	0.153641	-49.7863
tet(Z)	0.0397234	0.201758	0.162035	-4.07907
FosK	0.0515147	0.214803	0.163288	-3.16975
ErmR	0.0520814	0.21899	0.166909	-3.20477
AAC(6')-Isa	0.0344779	0.202355	0.167878	-4.86914
fusH	0.033912	0.202004	0.168092	-4.9567
QepA2	0.0100668	0.17827	0.168203	-16.7087
VatI	0.2134	0.382451	0.169052	-0.792183
lrfA	0.657696	0.829818	0.172122	-0.261704
erm(46)	0.00377972	0.181264	0.177484	-46.957
tet32	0.765955	0.946901	0.180946	-0.236235
abcA	0.164548	0.354417	0.189869	-1.15389
mefE	0.00932193	0.212291	0.202969	-21.7732
Mef(En2)	0.0571928	0.265654	0.208461	-3.64489
mefB	0.521844	0.73108	0.209237	-0.400956
norA	0.0855968	0.29598	0.210384	-2.45784
vanD	0.0496531	0.260799	0.211146	-4.25243
srmB	0.238556	0.456583	0.218027	-0.913943
vanI	0.0868182	0.305558	0.21874	-2.51952
vatH	0.486361	0.705119	0.218758	-0.449786
blt	0.21644	0.439888	0.223448	-1.03238
vanSF	1.47757	1.70255	0.224982	-0.152264
QnrA1	0.183904	0.413198	0.229294	-1.24682
vgaB	0.0678693	0.31	0.242131	-3.56761
SPG-1	0.577478	0.845264	0.267786	-0.463716
BahA	0.0143462	0.290522	0.276175	-19.2508
ykkC	0.2005	0.479264	0.278765	-1.39035
mecA	0.840346	1.1221	0.281755	-0.335284
QnrVC5	0.0654399	0.348368	0.282928	-4.32348
lmrD	3.00422	3.29818	0.293961	-0.0978495
rphA	0.578329	0.878918	0.300589	-0.519755
apmA	0.685801	0.987371	0.301569	-0.439733
mecB	0.935022	1.24171	0.306689	-0.328001
tetW	0.169465	0.476917	0.307451	-1.81424
tetO	0.153417	0.467102	0.313685	-2.04466
vanXI	0.0374873	0.369055	0.331567	-8.84479
amrB	0.255908	0.595252	0.339344	-1.32604
Erm(K)	0.0614305	0.401945	0.340515	-5.54309
vanYM	0.0262133	0.372612	0.346399	-13.2146
norB	0.127685	0.47492	0.347235	-2.71946
mecD	0.626465	0.987516	0.36105	-0.57633
mtrC	1.02941	1.39365	0.364239	-0.353834
dfrA8	0.0065089	0.370818	0.364309	-55.9709
ampS	0.0650995	0.435373	0.370273	-5.6878
vanYB	0.219219	0.611089	0.391869	-1.78757
rphB	4.12114	4.51433	0.39319	-0.095408
sul2	0.120231	0.522994	0.402762	-3.34989
cphA8	0.00671388	0.412589	0.405875	-60.4531
otr(A)	4.60596	5.02173	0.415771	-0.090268
tet44	0.431927	0.860809	0.428882	-0.99295
msrA	0.0885503	0.523301	0.434751	-4.90965
OXA-198	0.131796	0.574737	0.442941	-3.36082
PEDO-2	0.078156	0.540971	0.462815	-5.92168
qacB	0.206472	0.670678	0.464206	-2.24827
Erm(36)	0.145226	0.621334	0.476108	-3.2784
RbpA	0.0188638	0.548163	0.529299	-28.059
otr(B)	0.450474	1.01415	0.563681	-1.25131
vanN	0.994564	1.56788	0.573319	-0.576452
QnrA2	0.0452578	0.633018	0.587761	-12.9869
QnrA7	0.143847	0.732665	0.588818	-4.09337
tet(39)	0.143955	0.737341	0.593386	-4.12203
vanWI	0.0504773	0.807681	0.757203	-15.0009
adeI	0.12874	0.955072	0.826331	-6.41859
mel	0.335738	1.20793	0.872192	-2.59784
tap	0.638104	1.54634	0.908234	-1.42333
vanKI	0.296155	1.21352	0.917363	-3.09757
tetT	1.16961	2.10796	0.938349	-0.802272
mupB	5.59629	6.55842	0.962131	-0.171923
rpsJ	3.44326	4.47854	1.03528	-0.30067
QnrA6	0.285644	1.4505	1.16486	-4.07799
QnrC	0.477566	1.68947	1.2119	-2.53767
QnrA3	0.144442	1.42769	1.28325	-8.88421
tet(V)	0.500005	1.97242	1.47242	-2.9448
tsnR	2.02893	3.54009	1.51117	-0.744811
pmrF	6.75051	8.29518	1.54467	-0.228823
clbC	0.270619	1.84755	1.57693	-5.82712
mfpA	0.0652842	1.65409	1.58881	-24.3368
mupA	2.49778	4.80121	2.30342	-0.922186
QnrA5	0.028868	2.52665	2.49778	-86.5241
poxtA	0.959646	3.63923	2.67959	-2.79227
